# Supplementary material for: Asymmetric double-conjugate addition of alkenylboronic acids to dienones catalyzed by chiral diols
Source: Royal Society of Chemistry journal article supplement (doi:10.1039/d0qo01599g), 2021-01-01
Supplement: d0qo01599g1.pdf [file d0qo01599g1.pdf]

*Electronic Supplementary Information for*

**Asymmetric Double-Conjugate Addition of Alkenylboronic Acid to  
Dienones Catalyzed by Chiral Diols**

Ping Zhang, Guo-Li Chai,\* En-Ze Yao, Li-Xiao Guo, Xue-Yu Liu, Junbiao Chang\*

*Henan Key Laboratory of Organic Functional Molecules and Drug Innovation,  
School of Chemistry and Chemical Engineering, Henan Normal University, Xinxiang, Henan 453007, China*

E-mail: guolichai@126.com; changjunbiao@zzu.edu.cn

**Contents:**

|                                                                                                                            |     |
|----------------------------------------------------------------------------------------------------------------------------|-----|
| 1. General information .....                                                                                               | S2  |
| 2. Preparation of starting materials .....                                                                                 | S2  |
| 3. Detailed optimization of reaction conditions.....                                                                       | S5  |
| 4. General procedures for the preparation of racemic products.....                                                         | S9  |
| 5. General procedures for the catalytic asymmetric conjugate addition of boronic acid to dienones using <b>Cat 5</b> ..... | S9  |
| 6. General procedures for the catalytic asymmetric conjugate addition of boronic acid to dienones using <b>Cat 9</b> ..... | S24 |
| 7. General procedures for scale-up reaction.....                                                                           | S28 |
| 8. General procedures for transformation of the product <b>4ai</b> .....                                                   | S29 |
| 9. References .....                                                                                                        | S30 |
| 10. Copies of <sup>1</sup> H, <sup>13</sup> C, and <sup>19</sup> F NMR spectra.....                                        | S32 |
| 11. HPLC traces of optically active compounds .....                                                                        | S71 |

## 1. General information

All reactions were carried out under an atmosphere of nitrogen using standard Schlenk techniques. All the reactions that require heating were heated by oil bath. All solvents and reagents were obtained from commercial sources and purified according to established procedures before use. Flash chromatography (FC) was carried out using silica gel (300-400 mesh). HPLC analysis was performed on a Dionex UltiMate 3000, ThermoScientific. Chiral HPLC data for the products could be obtained using Chiralpak IB, Chiralpak ID, Chiralpak IE, Chiralpak IF, and Chiralpak IG column. These chiral columns were purchased from Daicel Chemical Industries Ltd. Optical rotations were measured on an Insmark polarimeter (IP-digi 300). <sup>1</sup>H NMR spectra were measured on a 400 MHz (Bruker, AVANCE NEO) or a 600 MHz spectrometer (Bruker, AVANCE III HD). Chemical shifts are reported in ppm from tetramethylsilane with the solvent resonance as the internal standard (CDCl<sub>3</sub>, δ = 7.26). Data are presented as follows: chemical shift (ppm), multiplicity (s = singlet, d = doublet, t = triplet, q = quartet, m = multiplet, brs = broad singlet), coupling constants in hertz (Hz), integration. <sup>13</sup>C NMR spectra were measured at 100 MHz (Bruker, AVANCE NEO) or 150 MHz (Bruker, AVANCE III HD). Chemical shifts are reported in ppm from tetramethylsilane with the solvent resonance as the internal standard (CDCl<sub>3</sub>, δ = 77.16). High-resolution mass spectra (HRMS) were recorded with a Bruker (Compact, TOF) mass spectrometer. All melting points were determined using a digital melting point apparatus (Shanghai INESA Physico-Optical Instrument Co., Ltd. SGW® X-4B) and were uncorrected. TLC was performed on glass-backed silica gel plate.

(*R*)-BINOL **Cat 1**, (*R*)-3,3'-Br<sub>2</sub>-BINOL **Cat 2**, (*R*)-3,3'-I<sub>2</sub>-BINOL **Cat 3**, (*R*)-3,3'-Ph<sub>2</sub>-BINOL **Cat 4**, and **Cat 5** bearing two 3,5-bis(trifluoromethyl)phenyl groups were purchased from Daicel Chemical Industries Ltd. (*S,S*)-1,8,9,16-tetrahydroxytetraphenylene **Cat 6** [(*S,S*)-THTP] and (*S*)-1,16-dihydroxytetraphenylene **Cat 7** [(*S*)-DHTP] were prepared according to the literature.<sup>1</sup> Chiral ligand (*S*)-2,15-dichlorotetraphenylene-1,16-diol **Cat 8**, (*S*)-2,15-dibromotetraphenylene-1,16-diol **Cat 9** [(*S*)-2,15-Br<sub>2</sub>-DHTP] and (*S*)-2,15-diphenyltetraphenylene-1,16-diol **Cat 10** [(*S*)-2,15-Ph<sub>2</sub>-DHTP] were prepared according to the procedure previously reported.<sup>2</sup>

## 2. Preparation of starting materials

Symmetrical dienones **1a-1q** were prepared following the literature procedure<sup>3a</sup> with starting acetone and appropriate aromatic aldehyde, using typical procedures for the aldol condensation.

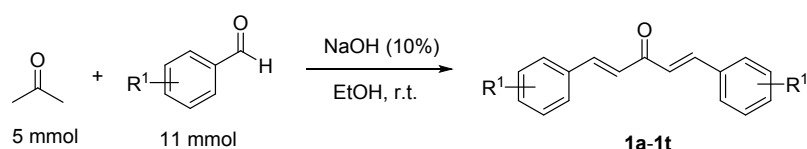

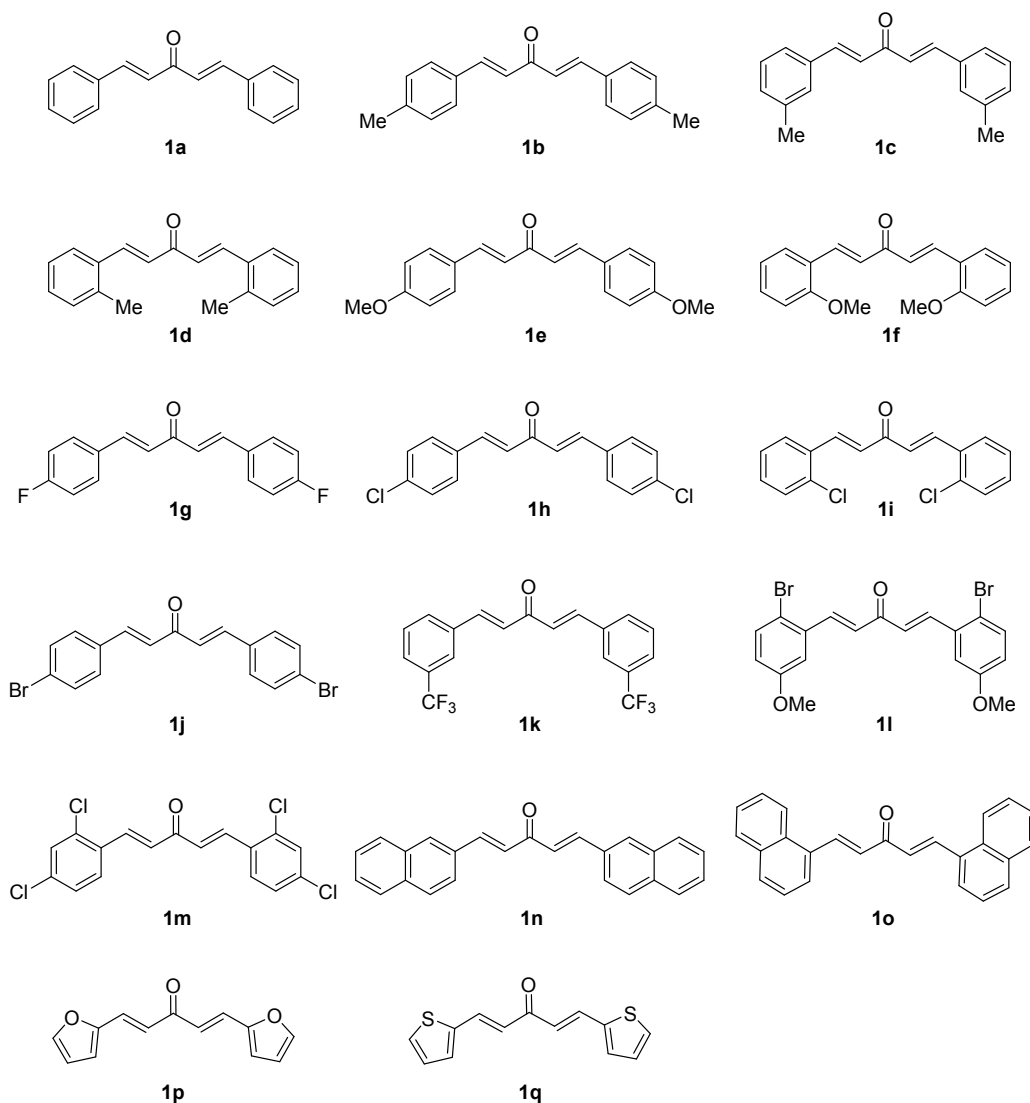

Symmetrical dienones **1a-1b**,<sup>3a</sup> **1d-1f**,<sup>3a</sup> **1g**,<sup>3b</sup> **1h-1j**,<sup>3a</sup> **1m**,<sup>3c</sup> **1n**,<sup>3d</sup> **1o-1p**,<sup>3a</sup> and **1q**<sup>3e</sup> are known compounds. The <sup>1</sup>H NMR spectral data match those previously reported for these compounds. The <sup>1</sup>H NMR, <sup>13</sup>C {<sup>1</sup>H} NMR, <sup>19</sup>F {<sup>1</sup>H} NMR, HRMS spectra and the corresponding characterization data of starting materials **1c**, **1k**, and **1l** not reported previously are provided.

*(1E,4E)-1,5-di-m-tolylpenta-1,4-dien-3-one (1c)*

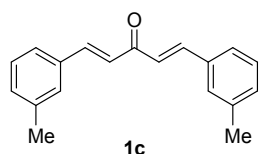

Yellow solid (686.5 mg, 52% yield); mp 66-67 °C;

<sup>1</sup>H NMR (400 MHz, CDCl<sub>3</sub>) δ 7.71 (d, *J* = 16.0 Hz, 2H), 7.44-7.42 (m, 4H), 7.33-7.29 (m, 2H), 7.24-7.22 (m, 2H), 7.07 (d, *J* = 16.0 Hz, 2H), 2.40 (s, 6H);

<sup>13</sup>C {<sup>1</sup>H} NMR (100 MHz, CDCl<sub>3</sub>) δ 189.2, 143.6, 138.8, 134.9, 131.5, 129.2, 129.0, 125.8, 125.4, 21.5;

HRMS (ESI)  $m/z$ :  $[M + Na]^+$  Calcd for  $C_{19}H_{18}ONa$  285.1250; Found 285.1236.

(1*E*,4*E*)-1,5-bis(3-(trifluoromethyl)phenyl)penta-1,4-dien-3-one (**1k**)

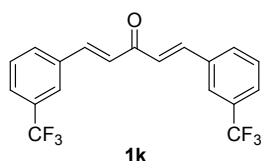

Yellow solid (256.4 mg, 14% yield); mp 114-115 °C;

$^1H$  NMR (400 MHz,  $CDCl_3$ )  $\delta$  7.88 (s, 2H), 7.79-7.75 (m, 4H), 7.68-7.67 (m, 2H), 7.58-7.54 (m, 2H), 7.14 (d,  $J = 16.0$  Hz, 2H);

$^{13}C$   $\{^1H\}$  NMR (100 MHz,  $CDCl_3$ )  $\delta$  188.2, 142.1, 135.6, 131.72 (q,  $J = 33.0$  Hz), 131.73, 129.7, 127.1 (q,  $J = 3.0$  Hz), 126.8, 124.9 (q,  $J = 3.0$  Hz), 123.9 (q,  $J = 271.0$  Hz);

$^{19}F$   $\{^1H\}$  NMR (376 MHz,  $CDCl_3$ )  $\delta$  -62.9;

HRMS (ESI)  $m/z$ :  $[M + Na]^+$  Calcd for  $C_{19}H_{12}F_6ONa$  393.0685; Found 393.0674.

(1*E*,4*E*)-1,5-bis(2-bromo-5-methoxyphenyl)penta-1,4-dien-3-one (**1l**)

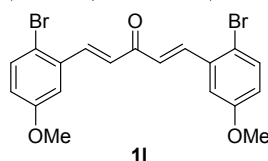

Yellow solid (699.2 mg, 31% yield); mp 129-131 °C;

$^1H$  NMR (400 MHz,  $CDCl_3$ )  $\delta$  8.03 (d,  $J = 16.0$  Hz, 2H), 7.52 (d,  $J = 8.8$  Hz, 2H), 7.21 (d,  $J = 3.2$  Hz, 2H), 7.00 (d,  $J = 16.0$  Hz, 2H), 6.85 (dd,  $J = 2.8, 8.8$  Hz, 2H); 3.85 (s, 6H);

$^{13}C$   $\{^1H\}$  NMR (100 MHz,  $CDCl_3$ )  $\delta$  188.9, 159.2, 142.3, 135.6, 134.3, 127.9, 117.9, 116.7, 112.9, 55.8;

HRMS (ESI)  $m/z$ :  $[M + Na]^+$  Calcd for  $C_{19}H_{16}Br_2O_3Na$  472.9358; Found 472.9340.

Unsymmetrical dienones **1r**<sup>4a</sup> and **1s**<sup>4b</sup> were prepared according to the literature procedures.<sup>4a</sup>

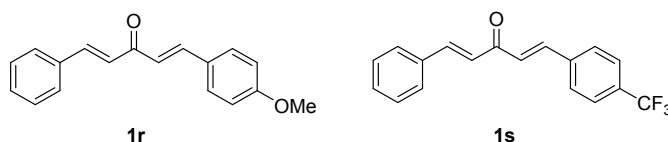

Dienones **1t** and **1u**<sup>5</sup> were synthesized according to the reported procedures.<sup>3a</sup> The analytic data of the **1t** is provided below.

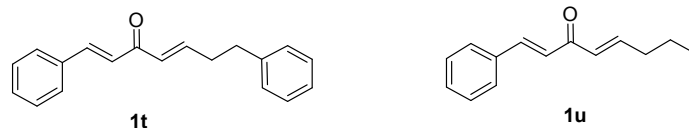

(1E,4E)-1,7-diphenylhepta-1,4-dien-3-one (**1t**)

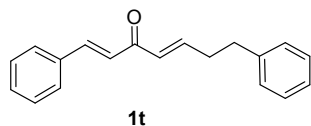

Yellow oil (308.8 mg, 65% yield);

$^1\text{H}$  NMR (400 MHz,  $\text{CDCl}_3$ )  $\delta$  7.61 (d,  $J = 16.0$  Hz, 1H), 7.58-7.56 (m, 2H), 7.41-7.39 (m, 3H), 7.33-7.29 (m, 2H), 7.24-7.20 (m, 3H), 7.07-6.99 (m, 1H), 6.94 (d,  $J = 16.0$  Hz, 1H), 6.48-6.43 (m, 1H), 2.84 (t,  $J = 8.0$  Hz, 2H), 2.63-2.60 (m, 2H);

$^{13}\text{C}$   $\{^1\text{H}\}$  NMR (150 MHz,  $\text{CDCl}_3$ )  $\delta$  189.1, 146.8, 143.1, 140.8, 134.8, 130.4, 129.7, 128.9, 128.5, 128.4, 128.3, 126.2, 124.9, 34.5, 34.4;

HRMS (ESI)  $m/z$ :  $[\text{M} + \text{Na}]^+$  Calcd for  $\text{C}_{19}\text{H}_{18}\text{ONa}$  285.1250; Found 285.1241.

Boronic acid **2a-2j** were purchased from commercial suppliers and used without further purification.

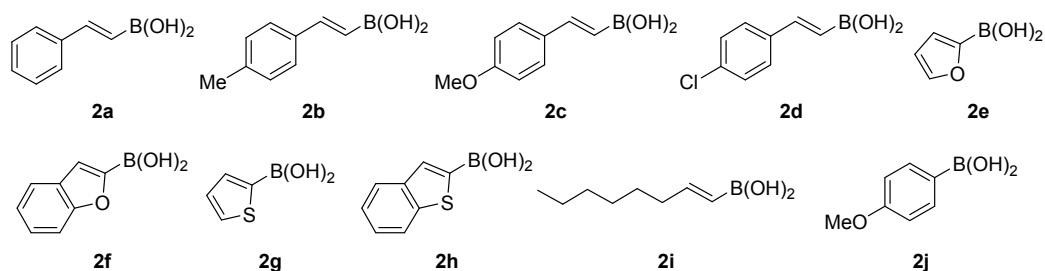

### 3. Detailed Optimization of Reaction Conditions

Table S1. Screening of Additives.<sup>a</sup>

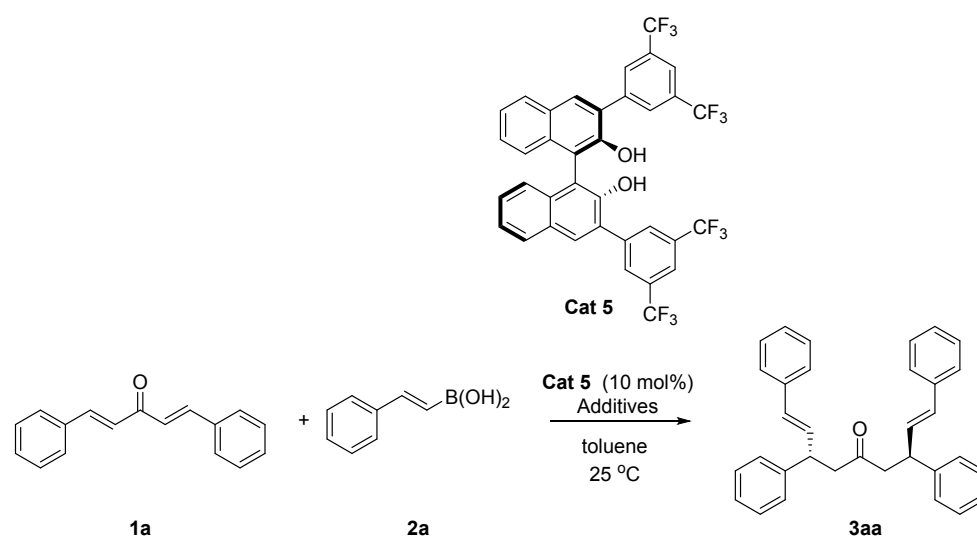

| entry <sup>a</sup> | Additives                                                      | time (h) | yield (%) <sup>b</sup> | dl-/meso- <sup>c</sup> | ee (%) <sup>d</sup> |
|--------------------|----------------------------------------------------------------|----------|------------------------|------------------------|---------------------|
| 1                  | 4 Å MS(100 mg),<br>Mg(O <sup>t</sup> Bu) <sub>2</sub> (0.1 eq) | 24       | 94                     | 94.8:5.2               | >99                 |
| 2                  | 4 Å MS(100 mg)                                                 | 24       | 91                     | 95.5:4.5               | >99                 |
| 3                  | -                                                              | 36       | trace                  | -                      | -                   |
| 4                  | 4 Å MS(100 mg),<br>LiO <sup>t</sup> Bu(0.1 eq)                 | 24       | 96                     | 94.2:5.8               | >99                 |
| 5                  | 4 Å MS(100 mg),<br>1-Adamantanol (0.1 eq)                      | 24       | 98                     | 95.8:4.2               | >99                 |
| 6                  | 4 Å MS(100 mg),<br>1-Adamantanol (1 eq)                        | 48       | 72                     | 96.1:3.9               | >99                 |
| 7                  | 4 Å MS(100 mg),<br>1-Adamantanol (2 eq)                        | 48       | 63                     | 96.3:3.7               | >99                 |
| 8                  | 4 Å MS(100 mg),<br>MeOH (2 eq)                                 | 36       | 88                     | 95.6:4.4               | >99                 |
| 9                  | 4 Å MS(100 mg),<br>HO <sup>t</sup> Bu (2 eq)                   | 48       | 89                     | 96.3:3.7               | >99                 |
| 10                 | 4 Å MS(100 mg),<br>HO <sup>t</sup> Bu (0.1 eq)                 | 24       | 90                     | 95.5:4.5               | >99                 |
| 11                 | 4 Å MS(100 mg),<br><sup>i</sup> PrOH (2 eq)                    | 48       | 79                     | 96.3:3.7               | >99                 |
| 12                 | 4 Å MS(100 mg),<br><sup>i</sup> PrOH (0.1 eq)                  | 24       | 96                     | 95.1:4.9               | >99                 |
| 13                 | 4 Å MS(100 mg),<br>HFIP (0.1 eq)                               | 24       | 96                     | 85.0:15.0              | >99                 |
| 14 <sup>e</sup>    | 4 Å MS(100 mg)<br>0 °C                                         | 48       | 66                     | 96.0:4.0               | >99                 |
| 15                 | 3 Å MS(100 mg)                                                 | 24       | 98                     | 95.5:4.5               | >99                 |

|                 |                |    |    |          |     |
|-----------------|----------------|----|----|----------|-----|
| 16              | 5 Å MS(100 mg) | 24 | 97 | 95.8:4.2 | >99 |
| 17 <sup>f</sup> | 4 Å MS(100 mg) | 36 | 89 | 92.9:7.1 | >99 |

<sup>a</sup>Unless otherwise stated, reactions were performed with **1a** (0.1 mmol), **2a** (0.3 mmol), 10 mol% Cat **5** in a dry toluene (1.0 mL) at 25 °C under N<sub>2</sub>. <sup>b</sup>Isolated yield. <sup>c</sup>*dl/meso* ratios were determined by chiral HPLC. <sup>d</sup>Determined by HPLC on a chiral stationary phase. <sup>e</sup>At 0 °C. <sup>f</sup>Using 5 mol% Cat **5**.

In the optimization of the reaction conditions, we used other additives such as LiO<sup>t</sup>Bu, 1-Adamantanol, MeOH, HO<sup>t</sup>Bu, <sup>i</sup>PrOH, HFIP and molecular sieves to improve the ratio of *dl/meso*, as shown in Table S1. In most cases, except for molecule sieves, the effect of other additives are not obvious.

**Table S2. Screening of Solvent Using Cat 9 as Catalyst.<sup>a</sup>**

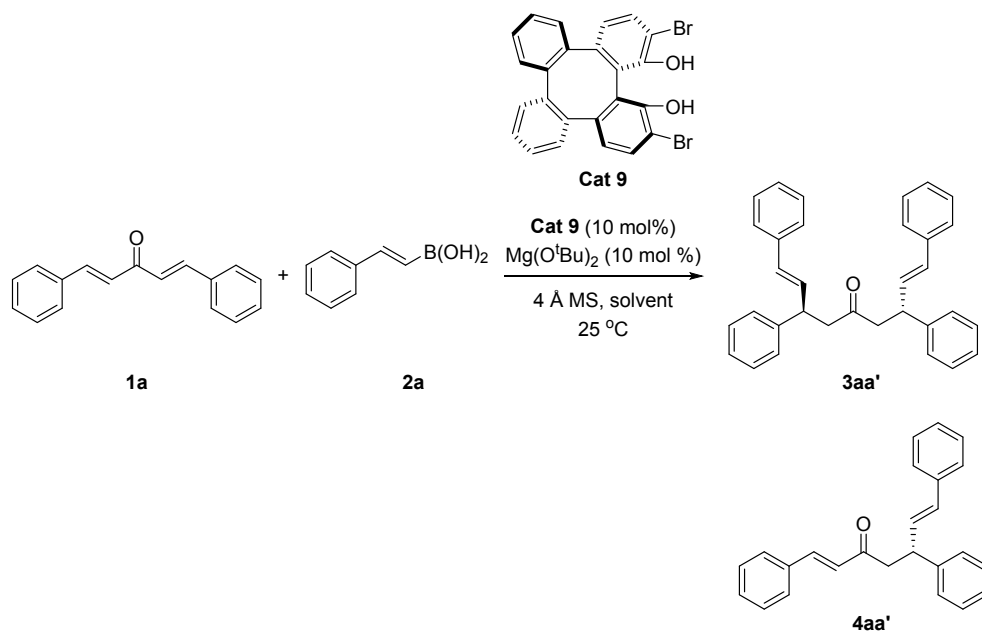

| entry <sup>a</sup> | solvent                        | time | yield of <b>3aa'</b> (%) <sup>b</sup> | <b>3aa'</b> <i>dl</i> -/ <i>meso</i> - <sup>c</sup> | ee of <b>3aa'</b> (%) <sup>d</sup> | yield of <b>4aa'</b> (%) <sup>b</sup> | ee of <b>4aa'</b> (%) <sup>d</sup> |
|--------------------|--------------------------------|------|---------------------------------------|-----------------------------------------------------|------------------------------------|---------------------------------------|------------------------------------|
| 1 <sup>e</sup>     | PhCF <sub>3</sub>              | 48   | 85                                    | 95.7:4.3                                            | >99                                | -                                     | -                                  |
| 2                  | PhCF <sub>3</sub>              | 24   | 87                                    | 95.9:4.1                                            | >99                                | -                                     | -                                  |
| 3                  | Toluene                        | 24   | 92                                    | 96.3:3.7                                            | >99                                | -                                     | -                                  |
| 4                  | DCM                            | 24   | 96                                    | 94:6                                                | 92                                 | -                                     | -                                  |
| 5                  | DCE                            | 24   | 95                                    | 92.7:7.3                                            | >99                                | -                                     | -                                  |
| 6                  | <i>o</i> -xylene               | 24   | 84                                    | 96.2:3.8                                            | >99                                | -                                     | -                                  |
| 7                  | PhCl                           | 24   | 88                                    | 94.4:5.6                                            | >99                                | -                                     | -                                  |
| 8                  | C <sub>6</sub> HF <sub>5</sub> | 48   | 84                                    | 93.4:6.6                                            | >99                                | -                                     | -                                  |

|    |                                    |    |    |           |     |    |    |
|----|------------------------------------|----|----|-----------|-----|----|----|
| 9  | MTBE                               | 24 | 87 | 96.2:3.8  | >99 | -  | -  |
| 10 | THF                                | 48 | -  | -         | -   | 36 | 62 |
| 11 | MeCN                               | 72 | 7  | 79.4:20.6 | 98  | 25 | 60 |
| 12 | Et <sub>2</sub> O                  | 48 | 79 | 96.6:3.4  | >99 | -  | -  |
| 13 | CF <sub>3</sub> CH <sub>2</sub> OH | 72 | 15 | 82.5:17.5 | 99  | 31 | 78 |

<sup>a</sup>Unless otherwise stated, reactions were performed with **1a** (0.1 mmol), **2a** (0.3 mmol), 10 mol% **Cat 9**, 10 mol% Mg(O<sup>t</sup>Bu)<sub>2</sub>, 4 Å MS (100 mg) in a dry solvent (1.0 mL) at 25 °C under N<sub>2</sub>. <sup>b</sup>Isolated yield. <sup>c</sup>dl/meso ratios were determined by chiral HPLC. <sup>d</sup>Determined by HPLC on a chiral stationary phase. <sup>e</sup>Using 2.0 eq of **2a**.

As shown in Table S2, the result in entry 3 was the best in terms of enantioselectivity and yield, and toluene was thus selected as the optimal solvent to further optimize the reaction conditions.

**Table S3. Screening of Additives Using Cat 9 as Catalyst.<sup>a</sup>**

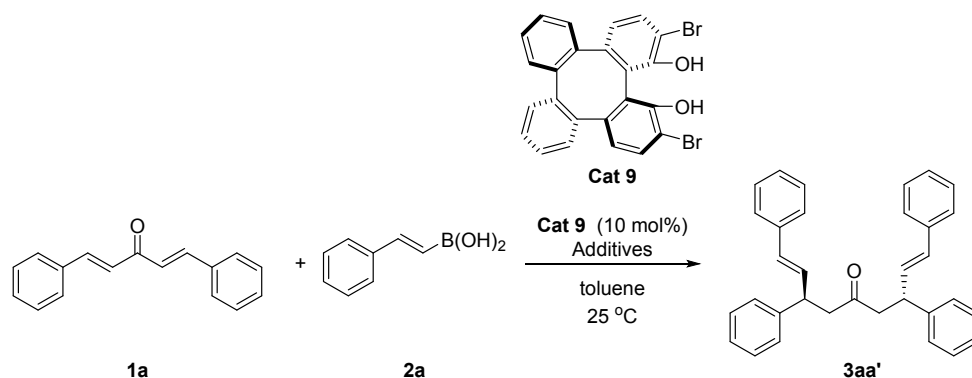

| entry <sup>a</sup> | Additives                                                   | time (h) | yield of <b>3aa'</b> (%) <sup>b</sup> | <b>3aa'</b> dl-/meso- <sup>c</sup> | ee of <b>3aa'</b> (%) <sup>d</sup> |
|--------------------|-------------------------------------------------------------|----------|---------------------------------------|------------------------------------|------------------------------------|
| 1                  | 4 Å MS(100 mg), Mg(O <sup>t</sup> Bu) <sub>2</sub> (0.1 eq) | 24       | 92                                    | 96.3:3.7                           | >99                                |
| 2                  | 3 Å MS(100 mg), Mg(O <sup>t</sup> Bu) <sub>2</sub> (0.1 eq) | 18       | 91                                    | 95.8:4.2                           | >99                                |
| 3                  | 5 Å MS(100 mg), Mg(O <sup>t</sup> Bu) <sub>2</sub> (0.1 eq) | 20       | 90                                    | 94.8:5.2                           | >99                                |
| 4                  | 4 Å MS(100 mg)                                              | 12       | 94                                    | 96.2:3.8                           | >99                                |
| 5                  | Mg(O <sup>t</sup> Bu) <sub>2</sub> (0.1 eq)                 | 28       | trace                                 | -                                  | -                                  |
| 6                  | 4 Å MS(100 mg), LiO <sup>t</sup> Bu(0.1 eq)                 | 24       | 93                                    | 96.1:3.9                           | >99                                |
| 7                  | 4 Å MS(100 mg), HO <sup>t</sup> Bu(2 eq)                    | 24       | 90                                    | 97.2:2.8                           | >99                                |
| 8                  | 4 Å MS(100 mg),                                             | 24       | 91                                    | 96.2:3.8                           | >99                                |



| MeOH (2 eq)     |                                         |    |    |           |     |
|-----------------|-----------------------------------------|----|----|-----------|-----|
| 9               | 4 Å MS(100 mg),<br><i>i</i> PrOH (2 eq) | 24 | 85 | 97.1:2.9  | >99 |
| 10              | 4 Å MS(100 mg),<br>HFIP (2 eq)          | 24 | 93 | 71.2:28.8 | 95  |
| 11              | 4 Å MS(100 mg),<br>1-Adamantanol (2 eq) | 24 | 91 | 97.2:2.8  | >99 |
| 12              | 4 Å MS(100 mg),<br>1-Adamantanol (1 eq) | 16 | 95 | 97.2:2.8  | >99 |
| 13 <sup>e</sup> | 4 Å MS(100 mg),<br>1-Adamantanol (1 eq) | 23 | 96 | 96.6:3.4  | >99 |
| 14 <sup>e</sup> | 4 Å MS(100 mg)                          | 24 | 92 | 96.1:3.9  | >99 |

<sup>a</sup>Unless otherwise stated, reactions were performed with **1a** (0.1 mmol), **2a** (0.3 mmol), 10 mol% Cat **9**, 4 Å MS (100 mg) in a dry toluene (1.0 mL) at 25 °C under N<sub>2</sub>. <sup>b</sup>Isolated yield. <sup>c</sup>*dl/meso* ratios were determined by chiral HPLC. <sup>d</sup>Determined by HPLC on a chiral stationary phase. <sup>e</sup>Using 5 mol% Cat **9**.

As shown in Table S3, the result in entry 14 was the best in terms of catalyst loading, enantioselectivity and yield, and was thus selected as the optimal conditions.

#### 4. General procedures for the preparation of racemic products

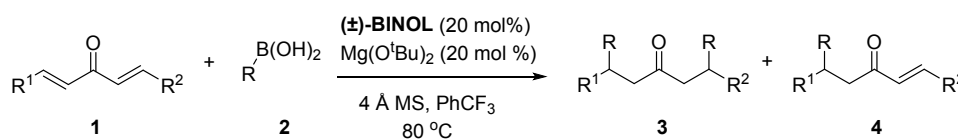

To a 10 mL Schlenk tube equipped with a stirring bar was added 4 Å MS (100 mg), and the tube was flamed-dried under high vacuum. After cooling to r.t., the tube was then backed-filled with nitrogen. Then boronic acid **2a–2i** (0.3 mmol, 3.0 equiv), Mg(O<sup>t</sup>Bu)<sub>2</sub> (0.02 mmol, 20 mol %), (±)-BINOL (0.02 mmol, 20 mol %), dienones **1a–1u** (0.1 mmol, 1.0 equiv), and dry PhCF<sub>3</sub> (1.0 mL) were successively added to the test tube under N<sub>2</sub>. The tube was capped, sealed and allowed to stir at 80 °C in an oil bath for 24 h. After the removal of solvents via rotary evaporation, the residue was purified through flash column chromatography on silica gel (eluent: petroleum ether/DCM = 3:1–1:1) to give pure bis-adduct **3** (a mixture of the *dl*- and *meso*-isomers) and mono-adduct **4**.

#### 5. General procedures for the catalytic asymmetric conjugate addition of boronic acid to dienones using Cat **5**

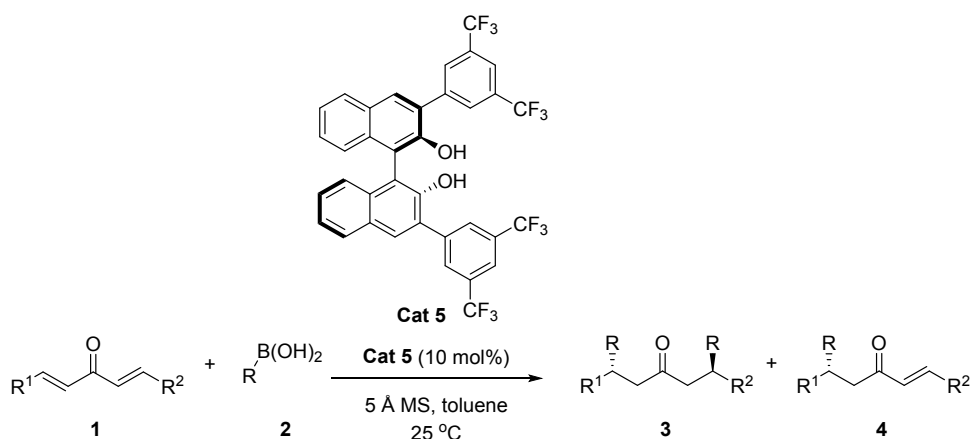

To a 10 mL Schlenk tube equipped with a stirring bar was added 5 Å MS (100 mg), and the tube was flamed-dried under high vacuum. After cooling to r.t., the tube was then backed-filled with nitrogen. Then boronic acid **2a-2i** (0.3 mmol, 3.0 equiv), **Cat 5** (0.01 mmol, 10 mol %), dienones **1a-1u** (0.1 mmol, 1.0 equiv), and dry toluene (1.0 mL) were successively added to the test tube under N<sub>2</sub>. The tube was capped, sealed and allowed to stir at 25 °C for 24-72 h. After the removal of solvents via rotary evaporation, the residue was purified through flash column chromatography on silica gel (eluent: petroleum ether/DCM = 3:1-1:1) to give pure bis-adduct **3** (a mixture of the *dl*- and *meso*-isomers) and mono-adduct **4**.

*(1E,3S,7S,8E)*-1,3,7,9-tetraphenylnona-1,8-dien-5-one (**3aa**)<sup>6</sup>

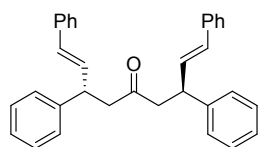

Eluent: hexane/DCM = 3:1-1:1; Colorless solid (42.8 mg, 97% yield); mp 102-103 °C;

HPLC (Daicel Chiralpak IB, hexane/*i*-PrOH = 90:10, flow rate 0.8 mL/min, λ = 254 nm) *t<sub>R</sub>* (1) = 15.4 min, *t<sub>R</sub>* (2) = 18.6 min, *t<sub>R</sub>* (3) = 26.2 min, *dl*-/*meso*- = 95.8:4.2, >99% *ee*; [α]<sub>D</sub><sup>25</sup> = -8.2 (*c* 2.0, CHCl<sub>3</sub>);

<sup>1</sup>H NMR (400 MHz, CDCl<sub>3</sub>) δ 7.29-7.16 (m, 20H), 6.31-6.20 (m, 4H), 4.05 (q, *J* = 6.8 Hz, 2H), 2.89-2.85 (m, 4H);

<sup>13</sup>C{<sup>1</sup>H} NMR (100 MHz, CDCl<sub>3</sub>) δ 206.9, 143.1, 137.2, 132.4, 130.1, 128.8, 128.6, 127.8, 127.4, 126.8, 126.4, 49.5, 43.8;

HRMS (ESI) *m/z*: [M + Na]<sup>+</sup> Calcd for C<sub>33</sub>H<sub>30</sub>ONa 465.2189; Found 465.2168.

*(1E,3S,7S,8E)*-1,9-diphenyl-3,7-di-*p*-tolylnona-1,8-dien-5-one (**3ba**)

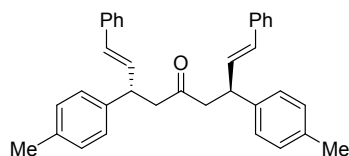

Eluent: hexane/DCM = 3:1-1:1; Colorless solid (46.8 mg, 99% yield); mp 75-77 °C;

HPLC (Daicel Chiralpak IB, hexane/*i*-PrOH = 90:10, flow rate 0.8 mL/min,  $\lambda$  = 254 nm)  $t_R$  (1) = 12.5 min,  $t_R$  (2) = 13.8 min,  $t_R$  (3) = 16.7 min, *dl*-/*meso*- = 97.0:3.0, >99% *ee*;  $[\alpha]_D^{25} = -10.1$  (*c* 2.0, CHCl<sub>3</sub>);

<sup>1</sup>H NMR (400 MHz, CDCl<sub>3</sub>)  $\delta$  7.25-7.21 (m, 8H), 7.19-7.16 (m, 2H), 7.10-7.05 (m, 8H), 6.29-6.18 (m, 4H), 4.02 (q, *J* = 6.8 Hz, 2H), 2.91-2.79 (m, 4H), 2.29 (s, 6H);

<sup>13</sup>C{<sup>1</sup>H} NMR (100 MHz, CDCl<sub>3</sub>)  $\delta$  207.1, 140.0, 137.3, 136.3, 132.7, 129.9, 129.5, 128.5, 127.6, 127.3, 126.4, 49.5, 43.4, 21.1;

HRMS (ESI) *m/z*: [M + Na]<sup>+</sup> Calcd for C<sub>35</sub>H<sub>34</sub>ONa 493.2502; Found 493.2500.

**(1E,3S,7S,8E)-1,9-diphenyl-3,7-di-*m*-tolylnona-1,8-dien-5-one (3ca)**

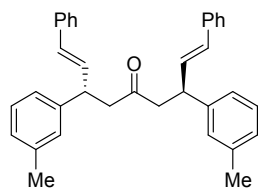

Eluent: hexane/DCM = 2:1-1:1; Colorless solid (43.6 mg, 93% yield); mp 90-93 °C;

HPLC (Daicel Chiralpak IB, hexane/*i*-PrOH = 90:10, flow rate 0.8 mL/min,  $\lambda$  = 254 nm)  $t_R$  (1) = 10.4 min,  $t_R$  (2) = 12.9 min,  $t_R$  (3) = 17.7 min, *dl*-/*meso*- = 95.5:4.5, >99% *ee*;  $[\alpha]_D^{27} = -8.1$  (*c* 2.0, CHCl<sub>3</sub>);

<sup>1</sup>H NMR (400 MHz, CDCl<sub>3</sub>)  $\delta$  7.25-7.13 (m, 12H), 7.01-6.99 (m, 6H), 6.31-6.20 (m, 4H), 4.02 (q, *J* = 6.8 Hz, 2H), 2.88-2.85 (m, 4H), 2.29 (s, 6H);

<sup>13</sup>C{<sup>1</sup>H} NMR (100 MHz, CDCl<sub>3</sub>)  $\delta$  207.0, 143.1, 138.4, 137.3, 132.6, 130.0, 128.7, 128.57, 128.55, 127.6, 127.3, 126.4, 124.7, 49.5, 43.7, 21.6;

HRMS (ESI) *m/z*: [M + Na]<sup>+</sup> Calcd for C<sub>35</sub>H<sub>34</sub>ONa 493.2502; Found 493.2482.

**(1E,3S,7S,8E)-1,9-diphenyl-3,7-di-*o*-tolylnona-1,8-dien-5-one (3da)**

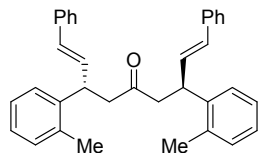

Eluent: hexane/DCM = 2:1-1:1; Colorless solid (43.1 mg, 92% yield); mp 91-93 °C;

HPLC (Daicel Chiralpak IG, hexane/*i*-PrOH = 95:5, flow rate 0.5 mL/min,  $\lambda$  =

254 nm)  $t_R$  (1) = 19.6 min,  $t_R$  (2) = 20.3 min,  $t_R$  (3) = 22.1 min, *dl*-/*meso*- = 92.0:8.0, >99% *ee*;  $[\alpha]_D^{26} = -5.5$  (c 2.0, CHCl<sub>3</sub>);

<sup>1</sup>H NMR (400 MHz, CDCl<sub>3</sub>)  $\delta$  7.24-7.21 (m, 8H), 7.19-7.09 (m, 10H), 6.23-6.12 (m, 4H), 4.32-4.27 (m, 2H), 2.91-2.88 (m, 4H), 2.34 (s, 6H);

<sup>13</sup>C{<sup>1</sup>H} NMR (100 MHz, CDCl<sub>3</sub>)  $\delta$  207.1, 141.0, 137.3, 136.2, 132.1, 130.9, 130.0, 128.5, 127.3, 126.6, 126.43, 126.41, 126.35, 49.0, 39.2, 19.7;

HRMS (ESI) *m/z*: [M + Na]<sup>+</sup> Calcd for C<sub>35</sub>H<sub>34</sub>ONa 493.2502; Found 493.2494.

(*1E,3S,7S,8E*)-3,7-bis(4-methoxyphenyl)-1,9-diphenylnona-1,8-dien-5-one (**3ea**)<sup>6</sup>

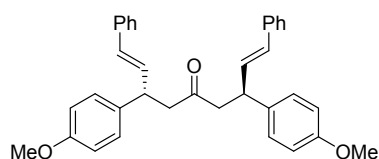

Eluent: hexane/DCM = 2:1-1:1; Colorless solid (47.9 mg, 95% yield); mp 144-147 °C;

HPLC (Daicel Chiralpak IB, hexane/*i*-PrOH = 85:15, flow rate 1.0 mL/min,  $\lambda$  = 254 nm)  $t_R$  (1) = 14.4 min,  $t_R$  (2) = 17.6 min,  $t_R$  (3) = 22.1 min, *dl*-/*meso*- = 97.3:2.7, >99% *ee*;  $[\alpha]_D^{26} = -12.2$  (c 2.0, CHCl<sub>3</sub>);

<sup>1</sup>H NMR (400 MHz, CDCl<sub>3</sub>)  $\delta$  7.26-7.10 (m, 14H), 6.80 (d, *J* = 8.4 Hz, 4H), 6.28-6.19 (m, 4H), 4.03-3.98 (m, 2H), 3.75 (s, 6H), 2.90-2.78 (m, 4H);

<sup>13</sup>C{<sup>1</sup>H} NMR (100 MHz, CDCl<sub>3</sub>)  $\delta$  207.3, 158.4, 137.3, 135.0, 132.8, 129.7, 128.8, 128.6, 127.3, 126.3, 114.2, 55.3, 49.6, 42.9;

HRMS (ESI) *m/z*: [M + Na]<sup>+</sup> Calcd for C<sub>35</sub>H<sub>34</sub>O<sub>3</sub>Na 525.2400; Found 525.2378.

(*1E,3S,7S,8E*)-3,7-bis(2-methoxyphenyl)-1,9-diphenylnona-1,8-dien-5-one (**3fa**)

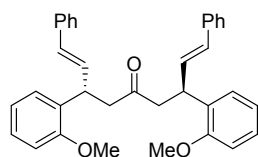

Eluent: hexane/DCM = 2:1-1:1; Colorless solid (48.3 mg, 96% yield); mp 75-76 °C;

HPLC (Daicel Chiralpak ID, hexane/*i*-PrOH = 90:10, flow rate 0.8 mL/min,  $\lambda$  = 254 nm)  $t_R$  (1) = 17.7 min,  $t_R$  (2) = 19.1 min,  $t_R$  (3) = 23.4 min, *dl*-/*meso*- = 95.6:4.4, >99% *ee*;  $[\alpha]_D^{26} = -20.5$  (c 2.0, CHCl<sub>3</sub>);

<sup>1</sup>H NMR (400 MHz, CDCl<sub>3</sub>)  $\delta$  7.26-7.14 (m, 14H), 6.89-6.83 (m, 4H), 6.37-6.28 (m, 4H), 4.44 (q, *J* = 6.8 Hz, 2H), 3.79 (s, 6H), 2.96-2.86 (m, 4H);

<sup>13</sup>C{<sup>1</sup>H} NMR (100 MHz, CDCl<sub>3</sub>)  $\delta$  207.9, 156.9, 137.6, 131.9, 131.5, 130.1, 128.5, 128.4, 127.7, 127.1, 126.4, 120.8, 111.0, 55.5, 48.1, 38.2;

HRMS (ESI) *m/z*: [M + Na]<sup>+</sup> Calcd for C<sub>35</sub>H<sub>34</sub>O<sub>3</sub>Na 525.2400; Found 525.2368.

(1*E*,3*S*,7*S*,8*E*)-3,7-bis(4-fluorophenyl)-1,9-diphenylnona-1,8-dien-5-one (**3ga**)

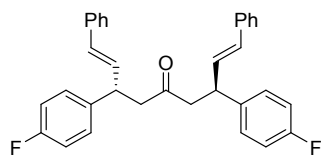

Eluent: hexane/DCM = 2:1-1:1; Colorless solid (46.0 mg, 96% yield); mp 68-69 °C;

HPLC (Daicel Chiralpak IB, hexane/*i*-PrOH = 80:20, flow rate 1.0 mL/min,  $\lambda$  = 254 nm)  $t_R(1)$  = 7.6 min,  $t_R(2)$  = 14.1 min,  $t_R(3)$  = 18.3 min, *dl*-/*meso*- = 94.0:6.0, >99% *ee*;  $[\alpha]_D^{27}$  = -6.9 (*c* 2.0, CHCl<sub>3</sub>);

<sup>1</sup>H NMR (400 MHz, CDCl<sub>3</sub>)  $\delta$  7.28-7.10 (m, 14H), 6.95-6.91 (m, 4H), 6.31-6.16 (m, 4H), 4.04 (q, *J* = 6.8 Hz, 2H), 2.91-2.79 (m, 4H);

<sup>13</sup>C{<sup>1</sup>H} NMR (100 MHz, CDCl<sub>3</sub>)  $\delta$  206.5, 161.7 (d, *J* = 244.0 Hz), 138.6 (d, *J* = 3.0 Hz), 137.0, 132.1, 130.3, 129.2 (d, *J* = 8.0 Hz), 128.6, 127.6, 126.3, 115.6 (d, *J* = 21.0 Hz), 49.5, 42.9;

<sup>19</sup>F{<sup>1</sup>H} NMR (376 MHz, CDCl<sub>3</sub>)  $\delta$  -116.1;

HRMS (ESI) *m/z*: [M + Na]<sup>+</sup> Calcd for C<sub>33</sub>H<sub>28</sub>F<sub>2</sub>ONa 501.2000; Found 501.1990.

(1*E*,3*S*,7*S*,8*E*)-3,7-bis(4-chlorophenyl)-1,9-diphenylnona-1,8-dien-5-one (**3ha**)

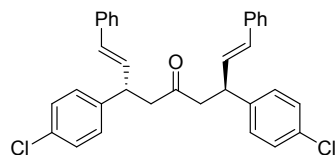

Eluent: hexane/DCM = 3:1-1:1; Colorless solid (47.1 mg, 92% yield); mp 51-52 °C;

HPLC (Daicel Chiralpak IB, hexane/*i*-PrOH = 80:20, flow rate 1.0 mL/min,  $\lambda$  = 254 nm)  $t_R(1)$  = 9.7 min,  $t_R(2)$  = 17.5 min,  $t_R(3)$  = 24.9 min, *dl*-/*meso*- = 96.3:3.7, >99% *ee*;  $[\alpha]_D^{23}$  = -8.5 (*c* 2.0, CHCl<sub>3</sub>);

<sup>1</sup>H NMR (600 MHz, CDCl<sub>3</sub>)  $\delta$  7.28-7.17 (m, 14H), 7.12-7.07 (m, 4H), 6.31-6.15 (m, 4H), 4.03 (q, *J* = 10.2 Hz, 2H), 2.93-2.77 (m, 4H);

<sup>13</sup>C{<sup>1</sup>H} NMR (150 MHz, CDCl<sub>3</sub>)  $\delta$  206.2, 141.5, 137.0, 132.6, 131.8, 130.6, 129.2, 128.9, 128.7, 127.6, 126.4, 49.3, 43.1;

HRMS (ESI) *m/z*: [M + Na]<sup>+</sup> Calcd for C<sub>33</sub>H<sub>28</sub>Cl<sub>2</sub>ONa 533.1409; Found 533.1390.

(1*E*,3*S*,7*S*,8*E*)-3,7-bis(2-chlorophenyl)-1,9-diphenylnona-1,8-dien-5-one (**3ia**)

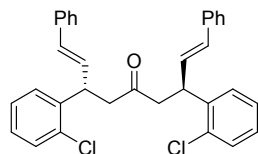

Eluent: hexane/DCM = 2:1-1:1; Colorless oil (46.9 mg, 92% yield);

HPLC (Daicel Chiralpak IB, hexane/*i*-PrOH = 80:20, flow rate 1.0 mL/min,  $\lambda$  = 254 nm)  $t_R$ (1) = 7.4 min,  $t_R$ (2) = 8.0 min,  $t_R$ (3) = 9.8 min, *dl*-/*meso*- = 92.6:7.4, >99% *ee*;  $[\alpha]_D^{23} = -25.3$  (*c* 2.0, CHCl<sub>3</sub>);

<sup>1</sup>H NMR (600 MHz, CDCl<sub>3</sub>)  $\delta$  7.35-7.33 (m, 2H), 7.25-7.10 (m, 16H), 6.35-6.22 (m, 4H), 4.60 (q, *J* = 7.2 Hz, 2H), 2.97-2.96 (m, 4H);

<sup>13</sup>C{<sup>1</sup>H} NMR (100 MHz, CDCl<sub>3</sub>)  $\delta$  205.9, 140.4, 137.1, 133.8, 131.1, 130.5, 130.2, 128.7, 128.6, 128.0, 127.5, 127.2, 126.5, 47.9, 40.3;

HRMS (ESI) *m/z*: [M + Na]<sup>+</sup> Calcd for C<sub>33</sub>H<sub>28</sub>Cl<sub>2</sub>ONa 533.1409; Found 533.1391.

(1*E*,3*S*,7*S*,8*E*)-3,7-bis(4-bromophenyl)-1,9-diphenylnona-1,8-dien-5-one (**3ja**)<sup>6</sup>

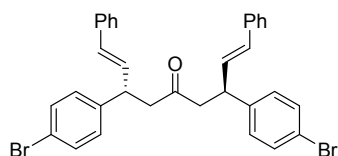

Eluent: hexane/DCM = 2:1-1:1; Colorless solid (55.4 mg, 92% yield); mp 103-104 °C;

HPLC (Daicel Chiralpak IB, hexane/*i*-PrOH = 70:30, flow rate 1.0 mL/min,  $\lambda$  = 254 nm)  $t_R$ (1) = 9.9 min,  $t_R$ (2) = 16.7 min,  $t_R$ (3) = 23.2 min, *dl*-/*meso*- = 96.5:3.5, >99% *ee*;  $[\alpha]_D^{25} = -6.2$  (*c* 2.0, CHCl<sub>3</sub>);

<sup>1</sup>H NMR (400 MHz, CDCl<sub>3</sub>)  $\delta$  7.38-7.35 (m, 4H), 7.29-7.17 (m, 10H), 7.06-7.04 (m, 4H), 6.28-6.14 (m, 4H), 4.01 (q, *J* = 7.2 Hz, 2H), 2.91-2.79 (m, 4H);

<sup>13</sup>C{<sup>1</sup>H} NMR (100 MHz, CDCl<sub>3</sub>)  $\delta$  206.2, 141.9, 136.9, 131.9, 131.6, 130.6, 129.6, 128.7, 127.6, 126.4, 120.6, 49.2, 43.1;

HRMS (ESI) *m/z*: [M + Na]<sup>+</sup> Calcd for C<sub>33</sub>H<sub>28</sub>Br<sub>2</sub>ONa 621.0399; Found 621.0401.

(1*E*,3*S*,7*S*,8*E*)-1,9-diphenyl-3,7-bis(3-(trifluoromethyl)phenyl)nona-1,8-dien-5-one (**3ka**)

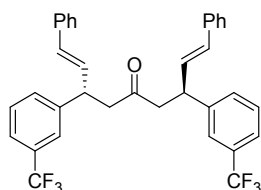

Eluent: hexane/DCM = 3:1-2:1; Colorless oil (27.8 mg, 48% yield);

HPLC (Daicel Chiralpak IB, hexane/*i*-PrOH = 80:20, flow rate 1.0 mL/min,  $\lambda$  = 254 nm)  $t_R$ (1) = 6.8 min,  $t_R$ (2) = 19.3 min,  $t_R$ (3) = 22.5 min, *dl*-/*meso*- = 91.5:8.5, >99% *ee*;  $[\alpha]_D^{20} = -1.2$  (*c* 2.0, CHCl<sub>3</sub>);

<sup>1</sup>H NMR (600 MHz, CDCl<sub>3</sub>)  $\delta$  7.47-7.43 (m, 4H), 7.39-7.32 (m, 4H), 7.28-7.18 (m, 10H), 6.35-6.17 (m, 4H), 4.13 (q, *J* = 10.8 Hz, 2H), 3.01-2.83 (m, 4H);

$^{13}\text{C}\{^1\text{H}\}$  NMR (150 MHz,  $\text{CDCl}_3$ )  $\delta$  205.6, 144.0, 136.8, 131.3, 131.2, 131.1 (q,  $J = 31.5$  Hz), 131.0, 129.3, 128.7, 127.7, 126.4, 124.4 (q,  $J = 4.5$  Hz), 124.2 (q,  $J = 271.5$  Hz), 123.8 (q,  $J = 6.0$  Hz), 49.2, 43.5;

$^{19}\text{F}\{^1\text{H}\}$  NMR (376 MHz,  $\text{CDCl}_3$ )  $\delta$  -62.5;

HRMS (ESI)  $m/z$ :  $[\text{M} + \text{Na}]^+$  Calcd for  $\text{C}_{35}\text{H}_{28}\text{F}_6\text{ONa}$  601.1937; Found 601.1922.

(1*E*,3*S*,7*S*,8*E*)-3,7-bis(2-bromo-5-methoxyphenyl)-1,9-diphenylnona-1,8-dien-5-one

**(3la)**

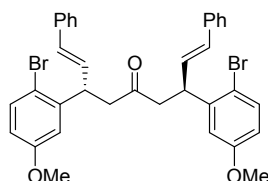

Eluent: hexane/DCM = 3:1-1:1; Colorless solid (41.3 mg, 63% yield); mp 112-113 °C;

HPLC (Daicel Chiralpak ID, hexane/*i*-PrOH = 80:20, flow rate 1.0 mL/min,  $\lambda = 254$  nm)  $t_R$  (1) = 12.2 min,  $t_R$  (2) = 13.3 min,  $t_R$  (3) = 23.0 min, *dl*-/*meso*- = 82.7:17.3, >99% *ee*;  $[\alpha]_D^{20} = -2.7$  (*c* 2.0,  $\text{CHCl}_3$ );

$^1\text{H}$  NMR (600 MHz,  $\text{CDCl}_3$ )  $\delta$  7.42 (d,  $J = 13.2$  Hz, 2H), 7.27-7.16 (m, 10H), 6.78 (d,  $J = 4.2$  Hz, 2H), 6.63-6.61 (m, 2H), 6.38-6.19 (m, 4H), 4.54 (q,  $J = 10.2$  Hz, 2H), 3.73 (s, 6H), 2.99-2.89 (m, 4H);

$^{13}\text{C}\{^1\text{H}\}$  NMR (100 MHz,  $\text{CDCl}_3$ )  $\delta$  205.7, 159.2, 143.1, 137.0, 133.9, 131.2, 130.3, 128.6, 127.5, 126.5, 115.1, 114.9, 113.3, 55.6, 48.0, 42.6;

HRMS (ESI)  $m/z$ :  $[\text{M} + \text{Na}]^+$  Calcd for  $\text{C}_{35}\text{H}_{32}\text{Br}_2\text{O}_3\text{Na}$  681.0610; Found 681.0610.

(1*E*,3*S*,7*S*,8*E*)-3,7-bis(2,4-dichlorophenyl)-1,9-diphenylnona-1,8-dien-5-one (**3ma**)

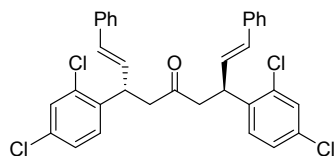

Eluent: hexane/DCM = 3:1-1:1; Colorless oil (43.5 mg, 75% yield);

HPLC (Daicel Chiralpak IB, hexane/*i*-PrOH = 90:10, flow rate 0.8 mL/min,  $\lambda = 254$  nm)  $t_R$  (1) = 13.0 min,  $t_R$  (2) = 18.7 min,  $t_R$  (3) = 27.9 min, *dl*-/*meso*- = 91.5:8.5, >99% *ee*;  $[\alpha]_D^{27} = -17.2$  (*c* 2.0,  $\text{CHCl}_3$ );

$^1\text{H}$  NMR (400 MHz,  $\text{CDCl}_3$ )  $\delta$  7.35 (t,  $J = 1.2$  Hz, 2H), 7.28-7.18 (m, 10H), 7.15-7.13 (m, 4H), 6.32-6.17 (m, 4H), 4.52 (q,  $J = 6.8$  Hz, 2H), 2.99-2.89 (m, 4H);

$^{13}\text{C}\{^1\text{H}\}$  NMR (100 MHz,  $\text{CDCl}_3$ )  $\delta$  205.4, 138.9, 136.8, 134.5, 133.0, 131.4, 129.9, 129.7, 129.5, 128.7, 127.7, 127.5, 126.4, 47.7, 39.8;

HRMS (ESI)  $m/z$ :  $[\text{M} + \text{Na}]^+$  Calcd for  $\text{C}_{33}\text{H}_{26}\text{Cl}_4\text{ONa}$  601.0630; Found 601.0613.

(1*E*,3*S*,7*S*,8*E*)-3,7-di(naphthalen-2-yl)-1,9-diphenylnona-1,8-dien-5-one (**3na**)

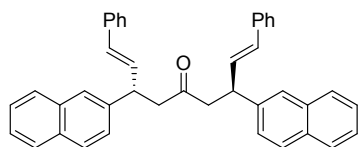

Eluent: hexane/DCM = 2:1-1:1; Colorless solid (53.7 mg, 99% yield); mp 136-138 °C;

HPLC (Daicel Chiralpak IB, hexane/*i*-PrOH = 80:20, flow rate 1.0 mL/min,  $\lambda$  = 254 nm)  $t_R$  (1) = 23.4 min,  $t_R$  (2) = 28.4 min,  $t_R$  (3) = 30.0 min, *dl*/*meso*- = 97.2:2.8, >99% *ee*;  $[\alpha]_D^{20}$  = -14.2 (*c* 2.0, CHCl<sub>3</sub>);

<sup>1</sup>H NMR (600 MHz, CDCl<sub>3</sub>)  $\delta$  7.77-7.70 (m, 6H), 7.61 (s, 2H), 7.44-7.40 (m, 4H), 7.32-7.30 (m, 2H), 7.23-7.14 (m, 10H), 6.34-6.25 (m, 4H), 4.24-4.21 (m, 2H), 3.06-2.92 (m, 4H);

<sup>13</sup>C{<sup>1</sup>H} NMR (150 MHz, CDCl<sub>3</sub>)  $\delta$  206.7, 140.5, 137.2, 133.7, 132.5, 132.3, 130.4, 128.6, 128.5, 127.9, 127.8, 127.4, 126.37, 126.31, 126.22, 126.17, 125.7, 49.4, 43.8;

HRMS (ESI) *m/z*: [M + Na]<sup>+</sup> Calcd for C<sub>41</sub>H<sub>34</sub>ONa 565.2502; Found 565.2487.

(1*E*,3*S*,7*S*,8*E*)-3,7-di(naphthalen-1-yl)-1,9-diphenylnona-1,8-dien-5-one (**3oa**)<sup>6</sup>

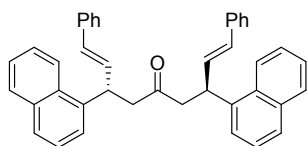

Eluent: hexane/DCM = 3:1-1:1; Colorless oil (48.6 mg, 90% yield);

HPLC (Daicel Chiralpak IB, hexane/*i*-PrOH = 80:20, flow rate 1.0 mL/min,  $\lambda$  = 254 nm)  $t_R$  (1) = 14.0 min,  $t_R$  (2) = 18.3 min,  $t_R$  (3) = 35.2 min, *dl*/*meso*- = 93.9:6.1, >99% *ee*;  $[\alpha]_D^{27}$  = -43.7 (*c* 2.0, CHCl<sub>3</sub>);

<sup>1</sup>H NMR (400 MHz, CDCl<sub>3</sub>)  $\delta$  8.14-8.11 (m, 2H), 7.84-7.82 (m, 2H), 7.72-7.69 (m, 2H), 7.46-7.43 (m, 4H), 7.38-7.32 (m, 4H), 7.23-7.15 (m, 10H), 6.43-6.27 (m, 4H), 4.95 (q, *J* = 6.4 Hz, 2H), 3.18-3.02 (m, 4H);

<sup>13</sup>C{<sup>1</sup>H} NMR (100 MHz, CDCl<sub>3</sub>)  $\delta$  206.9, 139.2, 137.2, 134.2, 132.0, 131.4, 130.7, 129.1, 128.6, 127.5, 127.4, 126.4, 125.8, 125.5, 124.4, 123.5, 49.2, 38.6;

HRMS (ESI) *m/z*: [M + Na]<sup>+</sup> Calcd for C<sub>41</sub>H<sub>34</sub>ONa 565.2502; Found 565.2481.

(1*E*,3*S*,7*S*,8*E*)-3,7-di(furan-2-yl)-1,9-diphenylnona-1,8-dien-5-one (**3pa**)

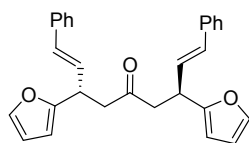

Eluent: hexane/DCM = 3:1-1:1; Colorless solid (39.7 mg, 94% yield); mp 86-88 °C;



HPLC (Daicel Chiralpak ID, hexane/*i*-PrOH = 80:20, flow rate 1.0 mL/min,  $\lambda$  = 254 nm)  $t_R(1)$  = 8.5 min,  $t_R(2)$  = 10.8 min,  $t_R(3)$  = 11.7 min, *dl*-/*meso*- = 93.8:6.2, >99% *ee*;  $[\alpha]_D^{24}$  = 26.6 (*c* 2.0, CHCl<sub>3</sub>);

<sup>1</sup>H NMR (600 MHz, CDCl<sub>3</sub>)  $\delta$  7.31-7.25 (m, 10H), 7.22-7.19 (m, 2H), 6.41 (d,  $J$  = 15.6 Hz, 2H), 6.28-6.24 (m, 2H), 6.20 (dd,  $J$  = 7.8, 15.6 Hz, 2H), 6.04-6.02 (m, 2H), 4.18 (q,  $J$  = 7.2 Hz, 2H), 3.00 (dd,  $J$  = 6.6, 16.2 Hz, 2H), 2.83 (dd,  $J$  = 7.2, 16.8 Hz, 2H);

<sup>13</sup>C{<sup>1</sup>H} NMR (150 MHz, CDCl<sub>3</sub>)  $\delta$  205.9, 155.8, 141.6, 137.1, 131.5, 129.3, 128.6, 127.6, 126.5, 110.4, 105.7, 47.1, 37.7;

HRMS (ESI) *m/z*: [M + Na]<sup>+</sup> Calcd for C<sub>29</sub>H<sub>26</sub>O<sub>3</sub>Na 445.1774; Found 445.1765.

(1*E*,3*S*,7*S*,8*E*)-1,9-diphenyl-3,7-di(thiophen-2-yl)nona-1,8-dien-5-one (**3qa**)<sup>6</sup>

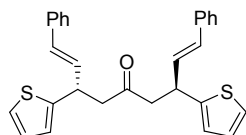

Eluent: hexane/DCM = 2:1-1:1; Colorless solid (36.4 mg, 80% yield); mp 112-114 °C;

HPLC (Daicel Chiralpak IB, hexane/*i*-PrOH = 80:20, flow rate 1.0 mL/min,  $\lambda$  = 254 nm)  $t_R(1)$  = 8.7 min,  $t_R(2)$  = 10.9 min,  $t_R(3)$  = 14.2 min, *dl*-/*meso*- = 95.1:4.9, >99% *ee*;  $[\alpha]_D^{23}$  = 7.3 (*c* 2.0, CHCl<sub>3</sub>);

<sup>1</sup>H NMR (400 MHz, CDCl<sub>3</sub>)  $\delta$  7.31-7.18 (m, 10H), 7.13-7.11 (m, 2H), 6.89-6.81 (m, 4H), 6.43-6.39 (m, 2H), 6.26-6.20 (m, 2H), 4.38 (q,  $J$  = 7.2 Hz, 2H), 3.02-2.87 (m, 4H);

<sup>13</sup>C{<sup>1</sup>H} NMR (100 MHz, CDCl<sub>3</sub>)  $\delta$  205.8, 146.8, 136.9, 131.6, 130.8, 128.6, 127.6, 127.0, 126.5, 124.2, 123.9, 50.3, 39.1;

HRMS (ESI) *m/z*: [M + Na]<sup>+</sup> Calcd for C<sub>29</sub>H<sub>26</sub>OS<sub>2</sub>Na 477.1317; Found 477.1316.

(1*E*,3*S*,7*S*,8*E*)-3-(4-methoxyphenyl)-1,7,9-triphenylnona-1,8-dien-5-one (**3ra**)

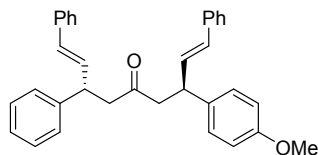

Eluent: hexane/DCM = 2:1-1:1; Colorless solid (40.3 mg, 85% yield); mp 70-71 °C;

HPLC (Daicel Chiralpak IB, hexane/*i*-PrOH = 80:20, flow rate 1.0 mL/min,  $\lambda$  = 254 nm)  $t_R(1)$  = 10.6 min,  $t_R(2)$  = 13.0 min,  $t_R(3)$  = 16.2 min,  $t_R(4)$  = 17.8 min, d.r. = 96.9:3.1, >99% *ee*;  $[\alpha]_D^{27}$  = -12.3 (*c* 2.0, CHCl<sub>3</sub>);

$^1\text{H}$  NMR (600 MHz,  $\text{CDCl}_3$ )  $\delta$  7.28-7.22 (m, 10H), 7.20-7.15 (m, 5H), 7.12-7.09 (m, 2H), 6.81-6.78 (m, 2H), 6.31-6.19 (m, 4H), 4.08-3.98 (m, 2H), 3.75 (s, 3H), 2.91-2.80 (m, 4H);

$^{13}\text{C}\{^1\text{H}\}$  NMR (150 MHz,  $\text{CDCl}_3$ )  $\delta$  207.1, 158.4, 143.1, 137.32, 137.28, 135.1, 132.9, 132.5, 130.2, 129.9, 128.81, 128.77, 128.6, 127.8, 127.40, 127.36, 126.8, 126.4, 114.2, 55.4, 49.6, 49.5, 43.8, 43.0;

HRMS (ESI)  $m/z$ :  $[\text{M} + \text{Na}]^+$  Calcd for  $\text{C}_{34}\text{H}_{32}\text{O}_2\text{Na}$  495.2295; Found 495.2290.

(1*E*,3*S*,7*S*,8*E*)-1,3,9-triphenyl-7-(4-(trifluoromethyl)phenyl)nona-1,8-dien-5-one (**3sa**)

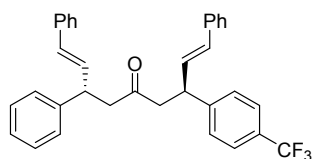

Eluent: hexane/DCM = 2:1-1:1; Colorless solid (48.8 mg, 96% yield); mp 94-95 °C;

HPLC (Daicel Chiralpak IB, hexane/*i*-PrOH = 80:20, flow rate 1.0 mL/min,  $\lambda$  = 254 nm)  $t_R$ (1) = 10.4 min,  $t_R$ (2) = 14.7 min,  $t_R$ (3) = 17.3 min,  $t_R$ (4) = 21.5 min, d.r. = 94.7:5.3, >99% *ee*;  $[\alpha]_D^{27} = -4.6$  (*c* 2.0,  $\text{CHCl}_3$ );

$^1\text{H}$  NMR (400 MHz,  $\text{CDCl}_3$ )  $\delta$  7.48 (d,  $J = 8.0$  Hz, 2H), 7.29-7.16 (m, 17H), 6.32-6.16 (m, 4H), 4.12 (q,  $J = 6.8$  Hz, 1H), 4.05 (q,  $J = 7.2$  Hz, 1H), 2.96-2.84 (m, 4H);

$^{13}\text{C}\{^1\text{H}\}$  NMR (100 MHz,  $\text{CDCl}_3$ )  $\delta$  206.3, 147.2, 142.9, 137.1, 136.9, 132.2, 131.4, 130.8, 130.3, 129.1, 128.9, 128.7, 128.6, 128.2, 127.72, 127.68, 127.5, 126.9, 126.4, 126.3, 125.7 (q,  $J = 4.0$  Hz), 124.3 (q,  $J = 270.0$  Hz), 49.3, 49.2, 44.0, 43.3;

$^{19}\text{F}\{^1\text{H}\}$  NMR (376 MHz,  $\text{CDCl}_3$ )  $\delta$  -62.4;

HRMS (ESI)  $m/z$ :  $[\text{M} + \text{Na}]^+$  Calcd for  $\text{C}_{34}\text{H}_{29}\text{F}_3\text{ONa}$  533.2063; Found 533.2049.

(1*E*,3*S*,7*S*,8*E*)-3-phenethyl-1,7,9-triphenylnona-1,8-dien-5-one (**3ta**)

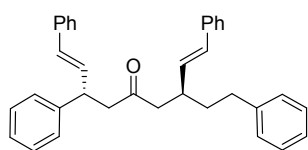

Eluent: hexane/DCM = 3:1-1:1; Colorless oil (27.2 mg, 58% yield);

HPLC (Daicel Chiralpak IB, hexane/*i*-PrOH = 80:20, flow rate 1.0 mL/min,  $\lambda$  = 254 nm)  $t_R$ (1) = 9.4 min,  $t_R$ (2) = 10.4 min,  $t_R$ (3) = 12.2 min,  $t_R$ (4) = 12.9 min, d.r. = 84.1:15.9, >99% *ee*;  $[\alpha]_D^{18} = 1.4$  (*c* 0.5,  $\text{CHCl}_3$ );

$^1\text{H}$  NMR (400 MHz,  $\text{CDCl}_3$ ) mixture of diastereomers  $\delta$  7.31-7.10 (m, 20H), 6.38-6.24 (m, 3H), 6.00-5.94 (m, 1H), 4.06 (q,  $J = 7.2$  Hz, 1H), 2.90-2.87 (m, 2H), 2.76-2.74 (m, 1H), 2.62-2.45 (m, 4H), 1.71-1.53 (m, 2H);

$^{13}\text{C}\{^1\text{H}\}$  NMR (150 MHz,  $\text{CDCl}_3$ ) mixture of diastereomers  $\delta$  207.7, 143.13, 143.08, 142.2, 137.4, 137.2, 132.76, 132.75, 132.52, 132.50, 131.08, 131.05, 130.17,

130.12, 128.80, 128.79, 128.64, 128.59, 128.51, 128.47, 127.82, 127.77, 127.38, 127.35, 126.8, 126.4, 126.3, 125.9, 49.5, 49.4, 49.3, 43.9, 38.5, 38.4, 36.7, 33.7, 33.6;  
HRMS (ESI) m/z: [M + Na]<sup>+</sup> Calcd for C<sub>35</sub>H<sub>34</sub>ONa 493.2502; Found 493.2484.

*(3S,7S,E)*-1,3-diphenyl-7-((*E*)-styryl)dec-1-en-5-one (**3ua**)

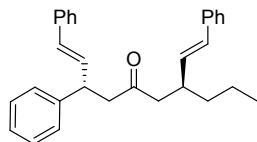

Eluent: hexane/DCM = 3:1-1:1; Colorless oil (27.8 mg, 68% yield);

HPLC (Daicel Chiralpak IB, hexane/*i*-PrOH = 80:20, flow rate 1.0 mL/min,  $\lambda$  = 254 nm)  $t_R$  (1) = 6.0 min,  $t_R$  (2) = 6.4 min,  $t_R$  (3) = 7.5 min,  $t_R$  (4) = 8.4 min, d.r. = 82.0:18.0, >99% *ee*;  $[\alpha]_D^{21} = 12.1$  (*c* 2.0, CHCl<sub>3</sub>);

<sup>1</sup>H NMR (400 MHz, CDCl<sub>3</sub>) mixture of diastereomers  $\delta$  7.30-7.15 (m, 15H), 6.37-6.25 (m, 3H), 5.96-5.90 (m, 1H), 4.08 (q, *J* = 6.8 Hz, 1H), 2.92-2.90 (m, 2H), 2.76-2.67 (m, 1H), 2.51-2.39 (m, 2H), 1.33-1.23 (m, 4H), 0.85-0.82 (m, 3H);

<sup>13</sup>C{<sup>1</sup>H} NMR (150 MHz, CDCl<sub>3</sub>) mixture of diastereomers  $\delta$  208.0, 143.2, 143.1, 137.5, 137.2, 133.34, 133.33, 132.6, 130.4, 130.3, 130.1, 128.79, 128.78, 128.6, 127.83, 127.79, 127.4, 127.2, 126.8, 126.3, 126.2, 49.54, 49.51, 49.46, 49.3, 43.9, 38.5, 37.3, 20.5, 20.4, 14.1;

HRMS (ESI) m/z: [M + Na]<sup>+</sup> Calcd for C<sub>30</sub>H<sub>32</sub>ONa 431.2345; Found 431.2336.

*(1E,3S,7S,8E)*-3,7-diphenyl-1,9-di-*p*-tolylnona-1,8-dien-5-one (**3ab**)

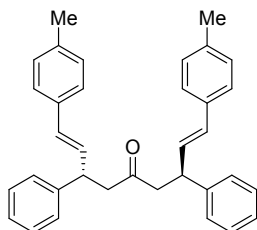

Eluent: hexane/DCM = 3:1-1:1; Colorless oil (41.1 mg, 87% yield);

HPLC (Daicel Chiralpak IE, hexane/*i*-PrOH = 90:10, flow rate 1.0 mL/min,  $\lambda$  = 254 nm)  $t_R$  (1) = 9.9 min,  $t_R$  (2) = 10.4 min,  $t_R$  (3) = 11.2 min, *dl*-/*meso*- = 95.3:4.7, >99% *ee*;  $[\alpha]_D^{20} = -6.6$  (*c* 2.0, CHCl<sub>3</sub>);

<sup>1</sup>H NMR (600 MHz, CDCl<sub>3</sub>)  $\delta$  7.27-7.24 (m, 4H), 7.19-7.14 (m, 10H), 7.06-7.05 (m, 4H), 6.27-6.16 (m, 4H), 4.03 (q, *J* = 7.2 Hz, 2H), 2.91-2.81 (m, 4H), 2.30 (s, 6H);

<sup>13</sup>C{<sup>1</sup>H} NMR (150 MHz, CDCl<sub>3</sub>)  $\delta$  207.1, 143.2, 137.1, 134.4, 131.4, 130.0, 129.3, 128.8, 127.8, 126.7, 126.3, 49.5, 43.8, 21.3;

HRMS (ESI) m/z: [M + Na]<sup>+</sup> Calcd for C<sub>35</sub>H<sub>34</sub>ONa 493.2502; Found 493.2491.

*(S,1E,6E)*-7-(4-methoxyphenyl)-1,5-diphenylhepta-1,6-dien-3-one (**4ac**)

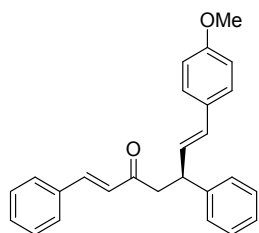

Eluent: hexane/EA = 20:1–10:1; Colorless oil (17.1 mg, 47% yield);

HPLC (Daicel Chiralpak ID, hexane/*i*-PrOH = 80:20, flow rate 1.0 mL/min,  $\lambda$  = 254 nm)  $t_R$  (major) = 13.8 min,  $t_R$  (minor) = 16.6 min, 58% *ee*;  $[\alpha]_D^{16} = -2.3$  (*c* 1.0, CHCl<sub>3</sub>);

<sup>1</sup>H NMR (600 MHz, CDCl<sub>3</sub>)  $\delta$  7.54–7.50 (m, 3H), 7.38–7.20 (m, 10H), 6.80 (d, *J* = 8.4 Hz, 2H), 6.71 (d, *J* = 16.2 Hz, 2H), 6.35 (d, *J* = 15.6 Hz, 1H), 6.25 (dd, *J* = 7.2, 15.6 Hz, 1H), 4.19 (q, *J* = 7.2 Hz, 1H), 3.78 (s, 3H), 3.22–3.14 (m, 2H);

<sup>13</sup>C{<sup>1</sup>H} NMR (150 MHz, CDCl<sub>3</sub>)  $\delta$  198.4, 159.1, 143.6, 142.9, 134.6, 130.6, 130.5, 130.1, 129.6, 129.1, 128.8, 128.4, 127.9, 127.5, 126.7, 126.5, 114.0, 55.4, 47.0, 44.3;

HRMS (ESI) *m/z*: [M + Na]<sup>+</sup> Calcd for C<sub>26</sub>H<sub>24</sub>O<sub>2</sub>Na 391.1669; Found 391.1669.

(1*E*,3*S*,7*S*,8*E*)-1,9-bis(4-chlorophenyl)-3,7-diphenylnona-1,8-dien-5-one (**3ad**)

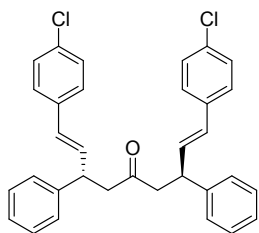

Eluent: hexane/DCM = 3:1–1:1; Colorless solid (51.0 mg, 99% yield); mp 87–88 °C;

HPLC (Daicel Chiralpak IE, hexane/*i*-PrOH = 90:10, flow rate 1.0 mL/min,  $\lambda$  = 254 nm)  $t_R$  (1) = 11.3 min,  $t_R$  (2) = 12.0 min,  $t_R$  (3) = 13.4 min, *dl*-/*meso*- = 93.6:6.4, >99% *ee*;  $[\alpha]_D^{18} = -12.9$  (*c* 2.0, CHCl<sub>3</sub>);

<sup>1</sup>H NMR (600 MHz, CDCl<sub>3</sub>)  $\delta$  7.28–7.24 (m, 4H), 7.21–7.13 (m, 14H), 6.23–6.17 (m, 4H), 4.04 (q, *J* = 6.6 Hz, 2H), 2.91–2.82 (m, 4H);

<sup>13</sup>C{<sup>1</sup>H} NMR (150 MHz, CDCl<sub>3</sub>)  $\delta$  206.7, 142.8, 135.6, 133.1, 133.0, 129.0, 128.9, 128.7, 127.7, 127.6, 126.9, 49.3, 43.7;

HRMS (ESI) *m/z*: [M + Na]<sup>+</sup> Calcd for C<sub>33</sub>H<sub>28</sub>OCl<sub>2</sub>Na 533.1409; Found 533.1409.

(1*E*,3*S*,7*S*,8*E*)-3,7-bis(2-bromo-5-methoxyphenyl)-1,9-di-*p*-tolylnona-1,8-dien-5-one (**31b**)

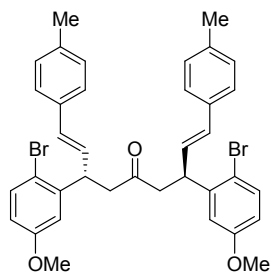

Eluent: hexane/DCM = 3:1-1:1; Colorless oil (48.3 mg, 70% yield);

HPLC (Daicel Chiralpak ID, hexane/*i*-PrOH = 80:20, flow rate 1.0 mL/min,  $\lambda$  = 254 nm)  $t_R$  (1) = 12.4 min,  $t_R$  (2) = 13.4 min,  $t_R$  (3) = 20.0 min, *dl*-/*meso*- = 88.5:11.5, >99% *ee*;  $[\alpha]_D^{21} = -3.3$  (*c* 2.0, CHCl<sub>3</sub>);

<sup>1</sup>H NMR (600 MHz, CDCl<sub>3</sub>)  $\delta$  7.43-7.41 (m, 2H), 7.16-7.14 (m, 4H), 7.05-7.03 (m, 4H), 6.78-6.77 (m, 2H), 6.63-6.61 (m, 2H), 6.33-6.30 (m, 2H), 6.20-6.16 (m, 2H), 4.53-4.51 (m, 2H), 3.734-3.730 (m, 6H), 2.93-2.91 (m, 4H), 2.30 (s, 6H);

<sup>13</sup>C{<sup>1</sup>H} NMR (150 MHz, CDCl<sub>3</sub>)  $\delta$  205.8, 159.2, 143.3, 137.3, 134.3, 133.9, 131.1, 129.3, 126.4, 115.1, 114.9, 113.4, 55.6, 48.1, 42.7, 21.3;

HRMS (ESI) *m/z*: [M + Na]<sup>+</sup> Calcd for C<sub>37</sub>H<sub>36</sub>Br<sub>2</sub>O<sub>3</sub>Na 709.0923; Found 709.0904.

*(1R,5R)*-1,5-bis(2-bromo-5-methoxyphenyl)-1,5-di(furan-2-yl)pentan-3-one (**31e**)

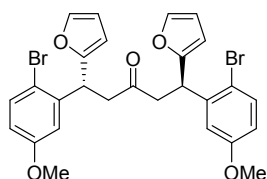

Eluent: hexane/DCM = 3:1-1:1; Colorless oil (44.8 mg, 76% yield);

HPLC (Daicel Chiralpak ID, hexane/*i*-PrOH = 80:20, flow rate 1.0 mL/min,  $\lambda$  = 220 nm)  $t_R$  (1) = 10.9 min,  $t_R$  (2) = 13.4 min,  $t_R$  (3) = 16.0 min, *dl*-/*meso*- = 73.0:27.0, 94% *ee*;  $[\alpha]_D^{18} = -11.4$  (*c* 2.0, CHCl<sub>3</sub>);

<sup>1</sup>H NMR (400 MHz, CDCl<sub>3</sub>)  $\delta$  7.44-7.41 (m, 2H), 7.30-7.26 (m, 2H), 6.65-6.62 (m, 4H), 6.27-6.24 (m, 2H), 6.01-5.99 (m, 2H), 5.06-5.01 (m, 2H), 3.712-3.707 (d, 6H), 3.21-3.14 (m, 2H), 3.00-2.95 (m, 2H);

<sup>13</sup>C{<sup>1</sup>H} NMR (100 MHz, CDCl<sub>3</sub>)  $\delta$  204.5, 159.2, 154.6, 142.0, 141.8, 133.8, 115.3, 114.5, 113.7, 110.4, 107.0, 55.5, 46.6, 39.5;

HRMS (ESI) *m/z*: [M + Na]<sup>+</sup> Calcd for C<sub>27</sub>H<sub>24</sub>Br<sub>2</sub>O<sub>5</sub>Na 608.9883; Found 608.9873.

*(1R,5R)*-1,5-di(benzofuran-2-yl)-1,5-bis(2-bromo-5-methoxyphenyl)pentan-3-one (**31f**)

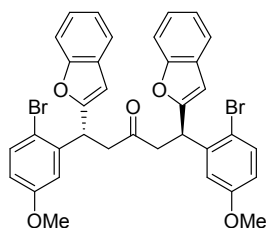

Eluent: hexane/DCM = 3:1-1:1; Colorless solid (54 mg, 79% yield); mp 70-72 °C; HPLC (Daicel Chiralpak IB, hexane/*i*-PrOH = 80:20, flow rate 1.0 mL/min,  $\lambda$  = 254 nm)  $t_R$  (1) = 8.1 min,  $t_R$  (2) = 9.2 min,  $t_R$  (3) = 10.3 min, *dl*-/*meso*- = 61.6:38.4, 91% *ee*;  $[\alpha]_D^{19} = -7.8$  (*c* 2.0, CHCl<sub>3</sub>);

<sup>1</sup>H NMR (400 MHz, CDCl<sub>3</sub>) mixture of diastereomers  $\delta$  7.46-7.33 (m, 6H), 7.22-7.13 (m, 4H), 6.74-6.73 (m, 2H), 6.66-6.62 (m, 2H), 6.34-6.33 (m, 2H), 5.22-5.18 (m, 2H), 3.68-3.67 (d, 6H), 3.38-3.30 (m, 2H), 3.15-3.09 (m, 2H);

<sup>13</sup>C {<sup>1</sup>H} NMR (100 MHz, CDCl<sub>3</sub>) mixture of diastereomers  $\delta$  204.10, 204.05, 159.3, 157.6, 157.55, 157.53, 154.9, 141.1, 141.0, 133.89, 133.87, 128.50, 128.48, 123.9, 122.8, 120.89, 120.86, 115.49, 115.45, 114.65, 114.64, 113.9, 113.8, 111.2, 104.2, 104.1, 55.5, 46.4, 39.9;

HRMS (ESI) *m/z*: [M + Na]<sup>+</sup> Calcd for C<sub>35</sub>H<sub>28</sub>Br<sub>2</sub>O<sub>5</sub>Na 709.0196; Found 709.0189.

*(R,E)*-1,5-bis(2-bromo-5-methoxyphenyl)-5-(thiophen-2-yl)pent-1-en-3-one (**4lg**)

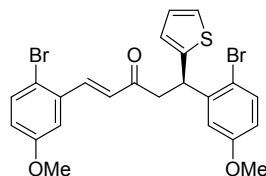

Eluent: hexane/DCM = 3:1-1:1; Colorless oil (39.9mg, 74% yield);

HPLC (Daicel Chiralpak IB, hexane/*i*-PrOH = 80:20, flow rate 1.0 mL/min,  $\lambda$  = 254 nm)  $t_R$  (major) = 8.9 min,  $t_R$  (minor) = 13.4 min, 87.3% *ee*;  $[\alpha]_D^{18} = -7.2$  (*c* 2.0, CHCl<sub>3</sub>);

<sup>1</sup>H NMR (400 MHz, CDCl<sub>3</sub>)  $\delta$  7.88 (d, *J* = 16.4 Hz, 2H), 7.47 (t, *J* = 8.8 Hz, 2H), 7.16-7.08 (m, 2H), 6.92-6.80 (m, 4H), 6.67-6.61 (m, 2H), 5.41 (t, *J* = 7.2 Hz, 1H), 3.81 (s, 3H), 3.74 (s, 3H), 3.53-3.38 (m, 2H);

<sup>13</sup>C {<sup>1</sup>H} NMR (100 MHz, CDCl<sub>3</sub>)  $\delta$  196.8, 159.3, 159.2, 146.1, 143.7, 141.7, 135.1, 134.2, 133.9, 128.6, 126.9, 125.0, 124.3, 118.2, 116.6, 115.2, 114.9, 113.6, 112.6, 55.7, 55.6, 47.3, 40.9;

HRMS (ESI) *m/z*: [M + Na]<sup>+</sup> Calcd for C<sub>23</sub>H<sub>20</sub>Br<sub>2</sub>O<sub>3</sub>SNa 556.9392; Found 556.9386.

*(R,E)*-5-(benzo[*b*]thiophen-2-yl)-1,5-bis(2-bromo-5-methoxyphenyl)pent-1-en-3-one

**(4lh)**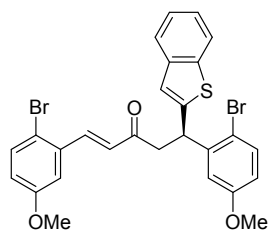

Eluent: hexane/DCM = 3:1-1:1; Colorless solid (52.9 mg, 90% yield); mp 90-91 °C;

HPLC (Daicel Chiralpak IB, hexane/*i*-PrOH = 80:20, flow rate 1.0 mL/min,  $\lambda$  = 254 nm)  $t_R$  (major) = 10.5 min,  $t_R$  (minor) = 18.0 min, 96% *ee*;  $[\alpha]_D^{23} = -15.8$  (*c* 2.0, CHCl<sub>3</sub>);

<sup>1</sup>H NMR (600 MHz, CDCl<sub>3</sub>)  $\delta$  7.91 (d, *J* = 16.2 Hz, 1H), 7.72-7.65 (m, 2H), 7.48 (dd, *J* = 2.4, 8.4 Hz, 2H), 7.30-7.24 (m, 2H), 7.12 (s, 1H), 7.08 (d, *J* = 3.0 Hz, 1H), 6.91 (d, *J* = 3.0 Hz, 1H), 6.81 (dd, *J* = 3.0, 9.0 Hz, 1H), 6.68-6.64 (m, 2H), 5.49-5.47 (m, 1H), 3.79 (s, 3H), 3.74 (s, 3H), 3.58 (dd, *J* = 7.8, 16.8 Hz, 1H), 3.46 (dd, *J* = 6.6, 16.8 Hz, 1H);

<sup>13</sup>C{<sup>1</sup>H} NMR (150 MHz, CDCl<sub>3</sub>)  $\delta$  196.5, 159.2, 159.1, 146.8, 142.8, 141.7, 139.7, 135.0, 134.1, 133.9, 128.5, 124.3, 124.0, 123.3, 122.2, 121.6, 118.1, 116.5, 115.3, 114.9, 113.6, 112.5, 55.6, 55.5, 46.7, 41.5;

HRMS (ESI) *m/z*: [M + Na]<sup>+</sup> Calcd for C<sub>27</sub>H<sub>22</sub>Br<sub>2</sub>O<sub>3</sub>SNa 606.9549; Found 606.9540.

**(*S*,1*E*,6*E*)-1,5-bis(2-bromo-5-methoxyphenyl)trideca-1,6-dien-3-one (4ai)**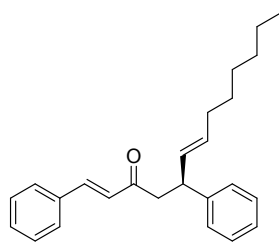

Eluent: hexane/DCM = 3:1-1:1; Colorless solid (25.3 mg, 73% yield); mp 43-44 °C;

HPLC (Daicel Chiralpak IB, hexane/*i*-PrOH = 90:10, flow rate 0.8 mL/min,  $\lambda$  = 254 nm)  $t_R$  (minor) = 6.4 min,  $t_R$  (major) = 6.8 min, 92% *ee*;  $[\alpha]_D^{21} = 4.1$  (*c* 2.0, CHCl<sub>3</sub>);

<sup>1</sup>H NMR (400 MHz, CDCl<sub>3</sub>)  $\delta$  7.52-7.48 (m, 3H), 7.39-7.37 (m, 3H), 7.32-7.17 (m, 5H), 6.69 (d, *J* = 16.0 Hz, 1H), 5.63-5.43 (m, 2H), 3.98 (q, *J* = 7.2 Hz, 1H), 3.11-2.98 (m, 2H), 1.98 (q, *J* = 6.8 Hz, 1H), 1.31-1.21 (m, 8H), 0.90-0.83 (m, 3H);

<sup>13</sup>C{<sup>1</sup>H} NMR (100 MHz, CDCl<sub>3</sub>)  $\delta$  198.8, 144.2, 142.8, 134.7, 132.2, 131.3, 130.6, 129.1, 128.7, 128.4, 127.7, 126.6, 126.5, 47.3, 44.3, 32.7, 31.8, 29.4, 28.9, 22.7, 14.2;

HRMS (ESI) *m/z*: [M + Na]<sup>+</sup> Calcd for C<sub>25</sub>H<sub>30</sub>ONa 369.2189; Found 369.2172.

## 6. General procedures for the catalytic asymmetric conjugate addition of boronic acid to dienones using Cat 9

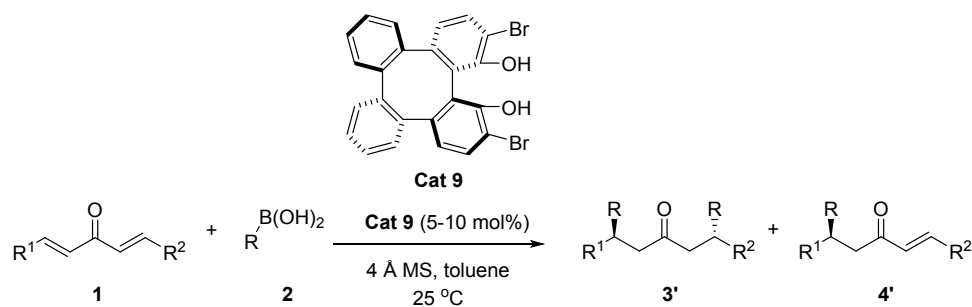

To a 10 mL Schlenk tube equipped with a stirring bar was added 4 Å MS (100 mg), and the tube was flamed-dried under high vacuum. After cooling to r.t., the tube was then backed-filled with nitrogen. Then boronic acid **2** (0.3 mmol, 3.0 equiv), **Cat 9** (0.005-0.01 mmol, 5-10 mol %), dienones **1** (0.1 mmol, 1.0 equiv), and dry toluene (1.0 mL) were successively added to the test tube under N<sub>2</sub>. The tube was capped, sealed and allowed to stir at 25 °C for 24-48 h. After the removal of solvents via rotary evaporation, the residue was purified through flash column chromatography on silica gel (eluent: petroleum ether/DCM = 3:1-1:1) to give pure bis-adduct **3'** (a mixture of the *dl*- and *meso*-isomers) and mono-adduct **4'**.

### (1*E*,3*R*,7*R*,8*E*)-1,3,7,9-tetraphenylnona-1,8-dien-5-one (**3aa'**)<sup>6</sup>

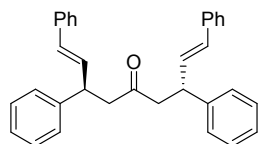

Eluent: hexane/DCM = 3:1-1:1; Colorless solid (40.7 mg, 92% yield); HPLC (Daicel Chiralpak IB, hexane/*i*-PrOH = 90:10, flow rate 0.8 mL/min,  $\lambda$  = 254 nm)  $t_R$ (1) = 15.6 min,  $t_R$ (2) = 18.7 min,  $t_R$ (3) = 26.0 min, *dl*-/*meso*- = 96.1:3.9, >99% *ee*;  $[\alpha]_D^{20}$  = 9.6 (*c* 2.0, CHCl<sub>3</sub>);

### (1*E*,3*R*,7*R*,8*E*)-3,7-bis(4-methoxyphenyl)-1,9-diphenylnona-1,8-dien-5-one (**3ea'**)<sup>6</sup>

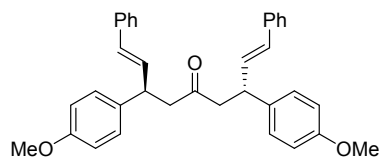

Eluent: hexane/DCM = 2:1-1:1; Colorless solid (49.8 mg, 99% yield); HPLC (Daicel Chiralpak IB, hexane/*i*-PrOH = 85:15, flow rate 1.0 mL/min,  $\lambda$  = 254 nm)  $t_R$ (1) = 14.4 min,  $t_R$ (2) = 17.8 min,  $t_R$ (3) = 21.6 min, *dl*-/*meso*- = 96.8:3.2, >99% *ee*;  $[\alpha]_D^{19}$  = 11.4 (*c* 2.0, CHCl<sub>3</sub>);

### (1*E*,3*R*,7*R*,8*E*)-3,7-bis(4-bromophenyl)-1,9-diphenylnona-1,8-dien-5-one (**3ja'**)<sup>6</sup>



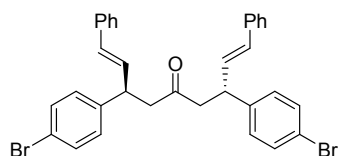

Eluent: hexane/DCM = 3:1-1:1; Colorless solid (57.7 mg, 96% yield); HPLC (Daicel Chiralpak IB, hexane/*i*-PrOH = 70:30, flow rate 1.0 mL/min,  $\lambda = 254$  nm)  $t_R(1) = 9.8$  min,  $t_R(2) = 16.2$  min,  $t_R(3) = 22.3$  min, *dl*-/*meso*- = 97.0:3.0, >99% *ee*;  $[\alpha]_D^{20} = 7.2$  (*c* 2.0, CHCl<sub>3</sub>);

(*1E,3R,7R,8E*)-1,9-diphenyl-3,7-bis(3-(trifluoromethyl)phenyl)nona-1,8-dien-5-one  
(**3ka'**)

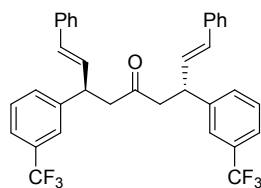

Eluent: hexane/DCM = 3:1-2:1; Colorless oil (56.1 mg, 97% yield); HPLC (Daicel Chiralpak IB, hexane/*i*-PrOH = 80:20, flow rate 1.0 mL/min,  $\lambda = 254$  nm)  $t_R(1) = 6.5$  min,  $t_R(2) = 19.3$  min,  $t_R(3) = 21.9$  min, *dl*-/*meso*- = 96.0:4.0, >99% *ee*;  $[\alpha]_D^{19} = 1.3$  (*c* 2.0, CHCl<sub>3</sub>);

(*1E,3R,7R,8E*)-3,7-bis(2-bromo-5-methoxyphenyl)-1,9-diphenylnona-1,8-dien-5-one  
(**3la'**)

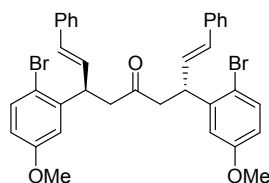

Eluent: hexane/DCM = 3:1-1:1; Colorless solid (47.4 mg, 72% yield); HPLC (Daicel Chiralpak ID, hexane/*i*-PrOH = 80:20, flow rate 1.0 mL/min,  $\lambda = 254$  nm)  $t_R(1) = 12.2$  min,  $t_R(2) = 13.4$  min,  $t_R(3) = 23.9$  min, *dl*-/*meso*- = 97.9:2.1, >99% *ee*;  $[\alpha]_D^{19} = 7.3$  (*c* 2.0, CHCl<sub>3</sub>);

(*1E,3R,7R,8E*)-3,7-bis(2,4-dichlorophenyl)-1,9-diphenylnona-1,8-dien-5-one (**3ma'**)

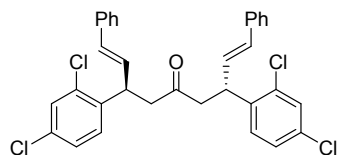

Eluent: hexane/DCM = 3:1-1:1; Colorless oil (53.7 mg, 92% yield); HPLC (Daicel Chiralpak IB, hexane/*i*-PrOH = 90:10, flow rate 0.8 mL/min,  $\lambda = 254$  nm)  $t_R(1) = 14.2$  min,  $t_R(2) = 18.8$  min,  $t_R(3) = 27.8$  min, *dl*-/*meso*- = 98.2:1.8, >99% *ee*;  $[\alpha]_D^{19} = 19.8$

(*c* 2.0, CHCl<sub>3</sub>);

(1*E*,3*R*,7*R*,8*E*)-3-(4-methoxyphenyl)-1,7,9-triphenylnona-1,8-dien-5-one (**3ra'**)

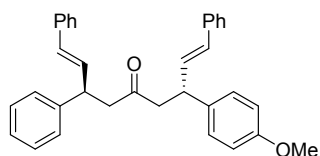

Eluent: hexane/DCM = 2:1-1:1; Colorless solid (37.8 mg, 80% yield);

HPLC (Daicel Chiralpak IB, hexane/*i*-PrOH = 80:20, flow rate 1.0 mL/min,  $\lambda$  = 254 nm)  $t_R$ (1) = 10.6 min,  $t_R$ (2) = 12.7 min,  $t_R$ (3) = 16.9 min,  $t_R$ (4) = 18.2 min, d.r. = 97.4:2.6, >99% *ee*;  $[\alpha]_D^{20}$  = 13.7 (*c* 2.0, CHCl<sub>3</sub>);

(1*E*,3*R*,7*R*,8*E*)-3-phenethyl-1,7,9-triphenylnona-1,8-dien-5-one (**3ta'**)

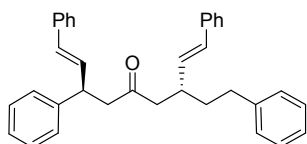

Eluent: hexane/DCM = 3:1-1:1; Colorless oil (46.6 mg, 99% yield);

HPLC (Daicel Chiralpak IB, hexane/*i*-PrOH = 80:20, flow rate 1.0 mL/min,  $\lambda$  = 254 nm)  $t_R$ (1) = 9.2 min,  $t_R$ (2) = 10.6 min,  $t_R$ (3) = 12.3 min,  $t_R$ (4) = 12.8 min, d.r. = 92.7:7.3, >99% *ee*;  $[\alpha]_D^{20}$  = -0.4 (*c* 2.0, CHCl<sub>3</sub>);

(1*E*,3*R*,7*R*,8*E*)-3,7-bis(2-bromo-5-methoxyphenyl)-1,9-di-*p*-tolylnona-1,8-dien-5-one (**3lb'**)

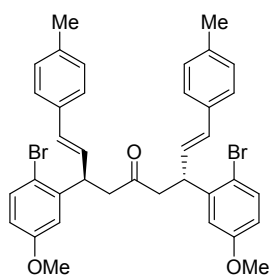

Eluent: hexane/DCM = 3:1-1:1; Colorless oil (68.8 mg, 99% yield); HPLC (Daicel Chiralpak ID, hexane/*i*-PrOH = 80:20, flow rate 1.0 mL/min,  $\lambda$  = 254 nm)  $t_R$ (1) = 12.3 min,  $t_R$ (2) = 13.3 min,  $t_R$ (3) = 20.1 min, *dl*-/*meso*- = 93.2:6.8, >99% *ee*;  $[\alpha]_D^{19}$  = 5.1 (*c* 2.0, CHCl<sub>3</sub>);

(1*S*,5*S*)-1,5-bis(2-bromo-5-methoxyphenyl)-1,5-di(furan-2-yl)pentan-3-one (**3lc'**)

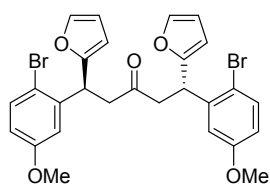

Eluent: hexane/DCM = 3:1-1:1; Colorless oil (49.8 mg, 85% yield); HPLC (Daicel Chiralpak ID, hexane/*i*-PrOH = 80:20, flow rate 1.0 mL/min,  $\lambda = 220$  nm)  $t_R$  (1) = 10.8 min,  $t_R$  (2) = 13.2 min,  $t_R$  (3) = 16.5 min, *dl*-/*meso*- = 86.1:13.9, >99% *ee*;  $[\alpha]_D^{23} = 13.7$  (*c* 2.0, CHCl<sub>3</sub>);

(1*S*,5*S*)-1,5-di(benzofuran-2-yl)-1,5-bis(2-bromo-5-methoxyphenyl)pentan-3-one (**31d'**)

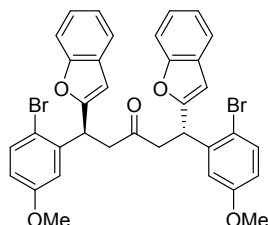

Eluent: hexane/DCM = 3:1-1:1; Colorless solid (59.1 mg, 86% yield); HPLC (Daicel Chiralpak IB, hexane/*i*-PrOH = 80:20, flow rate 1.0 mL/min,  $\lambda = 254$  nm)  $t_R$  (1) = 8.1 min,  $t_R$  (2) = 9.2 min,  $t_R$  (3) = 10.1 min, *dl*-/*meso*- = 83.8:16.2, >99% *ee*;  $[\alpha]_D^{23} = 13.7$  (*c* 2.0, CHCl<sub>3</sub>);

(1*S*,5*S*)-1,5-bis(benzo[*b*]thiophen-2-yl)-1,5-bis(2-bromo-5-methoxyphenyl)pentan-3-one (**31f'**)

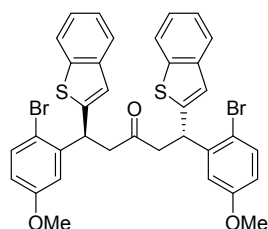

Eluent: hexane/DCM = 3:1-1:1; Colorless solid (40.3 mg, 56% yield); mp 88-90 °C;

HPLC (Daicel Chiralpak IB, hexane/*i*-PrOH = 85:15, flow rate 1.0 mL/min,  $\lambda = 254$  nm)  $t_R$  (1) = 16.8 min,  $t_R$  (2) = 17.2 min,  $t_R$  (3) = 18.6 min, *dl*-/*meso*- = 92.0:8.0, >99% *ee*;  $[\alpha]_D^{20} = -1.6$  (*c* 1.0, CHCl<sub>3</sub>);

<sup>1</sup>H NMR (400 MHz, CDCl<sub>3</sub>)  $\delta$  7.68-7.51 (m, 4H), 7.43 (d, *J* = 8.8 Hz, 2H), 7.28-7.20 (m, 4H), 6.94 (s, 2H), 6.78 (d, *J* = 2.8 Hz, 2H), 6.63 (dd, *J* = 2.8, 8.8 Hz, 2H), 5.35-5.32 (m, 2H), 3.68 (s, 6H), 3.35-3.17 (m, 4H);

<sup>13</sup>C{<sup>1</sup>H} NMR (100 MHz, CDCl<sub>3</sub>)  $\delta$  204.0, 159.3, 146.4, 142.7, 139.7, 139.4, 133.9, 124.3, 124.1, 123.4, 122.2, 121.7, 115.2, 114.8, 113.7, 55.5, 49.1, 41.2;

HRMS (ESI) *m/z*: [M + Na]<sup>+</sup> Calcd for C<sub>35</sub>H<sub>28</sub>Br<sub>2</sub>O<sub>3</sub>S<sub>2</sub>Na 740.9739; Found 740.9728.

## 7. General procedures for scale-up reaction

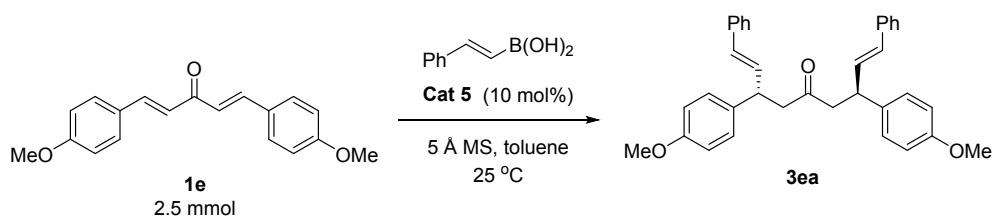

To a 100 mL Schlenk tube equipped with a stirring bar was added 5 Å MS (2.5 g), and the tube was flamed-dried under high vacuum. After cooling to r.t., the tube was then backed-filled with nitrogen. Then boronic acid **2a** (7.5 mmol, 3.0 equiv), **Cat 5** (0.25 mmol, 10 mol %), dienones **1e** (2.5 mmol, 1.0 equiv), and dry toluene (25.0 mL) were successively added to the test tube under N<sub>2</sub>. The tube was capped, sealed and allowed to stir at 25 °C for 48 h. After the removal of solvents via rotary evaporation, the residue was purified through flash column chromatography on silica gel (eluent: petroleum ether/DCM = 2:1–1:1) to give pure bis-adduct **3ea** (a mixture of the *dl*- and *meso*-isomers). Colorless solid, 1.18 g, 94% yield, *dl*-/*meso*- = 96.4:3.6, >99% *ee* for *dl*- isomer.

## 8. General procedures for transformation of the product **4ag**

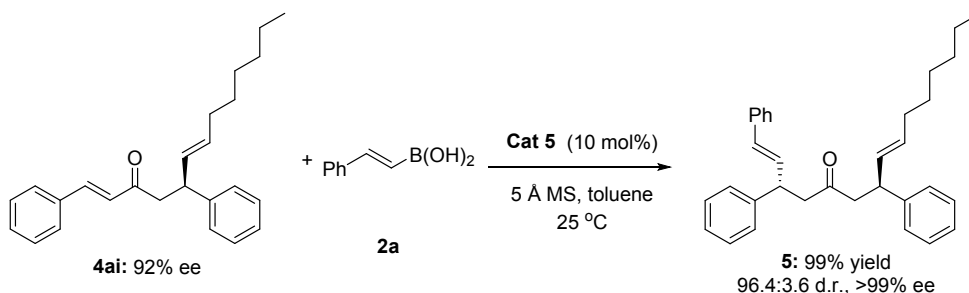

To a 10 mL Schlenk tube equipped with a stirring bar was added 5 Å MS (100 mg), and the tube was flamed-dried under high vacuum. After cooling to r.t., the tube was then backed-filled with nitrogen. Then boronic acid **2a** (0.2 mmol, 2.0 equiv), **Cat 5** (0.01 mmol, 10 mol %), mono-adduct **4ai** (0.1 mmol, 1.0 equiv), and dry toluene (1.0 mL) were successively added to the test tube under N<sub>2</sub>. The tube was capped, sealed and allowed to stir at 25 °C for 24 h. After the removal of solvents via rotary evaporation, the residue was purified through flash column chromatography on silica gel (eluent: petroleum ether/DCM = 3:1–1:1) to give pure bis-adduct **5** (45.0 mg, 99% yield, 96.4:3.6 d.r., >99% *ee*).

(*1E,3S,7S,8E*)-1,3,7-triphenylpentadeca-1,8-dien-5-one (**5**)

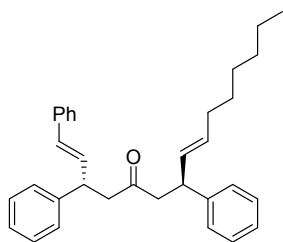

HPLC (Daicel Chiralpak IB, hexane/*i*-PrOH = 90:10, flow rate 1.0 mL/min,  $\lambda$  = 254 nm)  $t_R$  (1) = 5.3 min,  $t_R$  (2) = 5.7 min,  $t_R$  (3) = 6.3 min,  $t_R$  (4) = 8.5 min, d.r. = 96.4:3.6, >99% *ee*;  $[\alpha]_D^{20} = -15.3$  (*c* 2.1, CHCl<sub>3</sub>);

<sup>1</sup>H NMR (400 MHz, CDCl<sub>3</sub>)  $\delta$  7.31-7.12 (m, 15H), 6.31-6.19 (m, 2H), 5.49-5.31 (m, 2H), 4.05 (q, *J* = 6.8 Hz, 1H), 3.82 (q, *J* = 7.2 Hz, 1H), 2.89-2.68 (m, 4H), 1.90 (q, *J* = 6.8 Hz, 2H), 1.30-1.88 (m, 8H), 0.86 (t, *J* = 6.8 Hz, 3H);

<sup>13</sup>C{<sup>1</sup>H} NMR (100 MHz, CDCl<sub>3</sub>)  $\delta$  207.2, 143.9, 143.2, 137.3, 132.6, 132.1, 131.1, 130.1, 128.8, 128.64, 128.56, 127.8, 127.6, 127.4, 126.7, 126.5, 126.4, 49.8, 49.4, 43.7, 32.6, 31.8, 29.4, 28.9, 22.7, 14.2;

HRMS (ESI) *m/z*: [M + Na]<sup>+</sup> Calcd for C<sub>33</sub>H<sub>38</sub>ONa 473.2815; Found 473.2802.

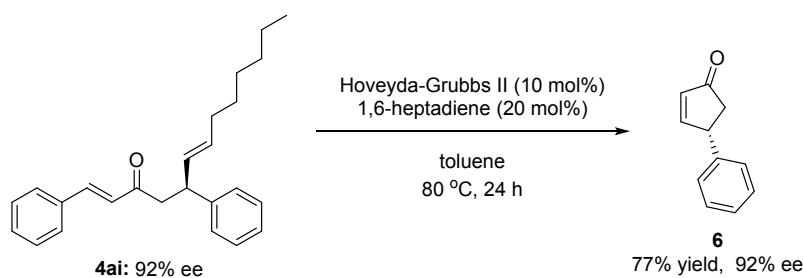

Under an argon atmosphere, a 25 mL Schlenk tube equipped with a stirring bar was diene **4ai** (34.6 mg, 0.1 mmol, 92% *ee*), Hoveyda-Grubbs II catalyst (6.2 mg, 10 mol%), 1,6-heptadiene (2.7  $\mu$ L, 20 mol %), and dry toluene (2 mL) at room temperature. Then, the tube was capped, sealed and allowed to stir at 80 °C for 24 h. The reaction mixture was cooled to rt and purified by flash column chromatography on silica gel (eluent: petroleum ether/DCM = 3:1) to give cyclopentenone **5** (12.2 mg, 77% yield, 92% *ee*).

(*S*)-4-Phenyl-2-cyclopenten-1-one (**6**)<sup>6</sup>

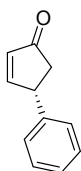

HPLC (Daicel Chiralpak IF, hexane/*i*-PrOH = 95:5, flow rate 1.0 mL/min,  $\lambda$  = 220 nm)  $t_R$  (minor) = 11.1 min,  $t_R$  (major) = 11.7 min, 92% *ee*;  $[\alpha]_D^{17} = -157.7$  (*c* 0.5, CHCl<sub>3</sub>) [*lit.*  $[\alpha]_D^{31} = -275$  (*c* 0.680, CHCl<sub>3</sub>) for 87% *ee*];

$^1\text{H}$  NMR (400 MHz,  $\text{CDCl}_3$ )  $\delta$  7.61-7.59 (m, 1H), 7.29-7.07 (m, 5H), 6.26-6.24 (m, 1H), 4.11-4.09 (m, 1H), 2.83 (dd,  $J = 6.8, 18.8$  Hz, 1H), 2.26 (dd,  $J = 2.4, 18.8$  Hz, 1H).

HRMS (ESI)  $m/z$ :  $[\text{M} + \text{Na}]^+$  Calcd for  $\text{C}_{11}\text{H}_{10}\text{ONa}$  181.0624; Found 181.0623.

## 9. References

- [1] Chai, G.-L.; Han, J.-W.; Wong, H. N. C. *Synthesis* **2017**, *49*, 181–187.
- [2] Chai, G.-L.; Zhu, B.; Chang, J. *J. Org. Chem.* **2019**, *84*, 120–127.
- [3] (a) Ashtekar, K. D.; Ding, X.; Toma, E.; Sheng, W.; Gholami, H.; Rahn, C.; Reed, P.; Borhan, B. *Org. Lett.* **2016**, *18*, 3976–3979; (b) Daneshfar, Z.; Rostami, A. *RSC Adv.* **2015**, *5*, 104695–104707; (c) Aher, R. B.; Wanare, G.; Kawathekar, N.; Kumar, R. R.; Kaushik, N. K.; Sahal D.; Chauhan, V. S. *Bioorg. Med. Chem. Lett.* **2011**, *21*, 3034–3036; (d) Horvath, K. L.; Newton, C. G.; Roper, K. A.; Ward, Jas S.; Sherburn, M. S. *Chem. Eur. J.* **2019**, *25*, 4072–4076; (e) Aguilera, E.; Varela, J.; Birriel, E.; Serna, E.; Torres, S.; Yaluff, G. *et al. ChemMedChem* **2016**, *11*, 1328–1338.
- [4] (a) Weber, M.; Frey, W.; Peters, R. *Chem. Eur. J.* **2013**, *19*, 8342–8351; (b) Mo, D.-L.; Pecak, W. H.; Zhao, M.; Wink, D. J.; Anderson, L. L. *Org. Lett.* **2014**, *16*, 3696–3699.
- [5] Ogiwara, Y.; Sakino, D.; Sakurai, Y.; Sakai, N. *Eur. J. Org. Chem.* **2017**, 4324–4327.
- [6] Sugiura, M.; Kinoshita, R.; Nakajima, M. *Org. Lett.* **2014**, *16*, 5172–5175.

10. Copies of  $^1\text{H}$ ,  $^{13}\text{C}$ , and  $^{19}\text{F}$  NMR spectra  
(*1E,4E*)-1,5-di-*m*-tolylpenta-1,4-dien-3-one (**1c**)

$^1\text{H}$  NMR (400 MHz,  $\text{CDCl}_3$ )

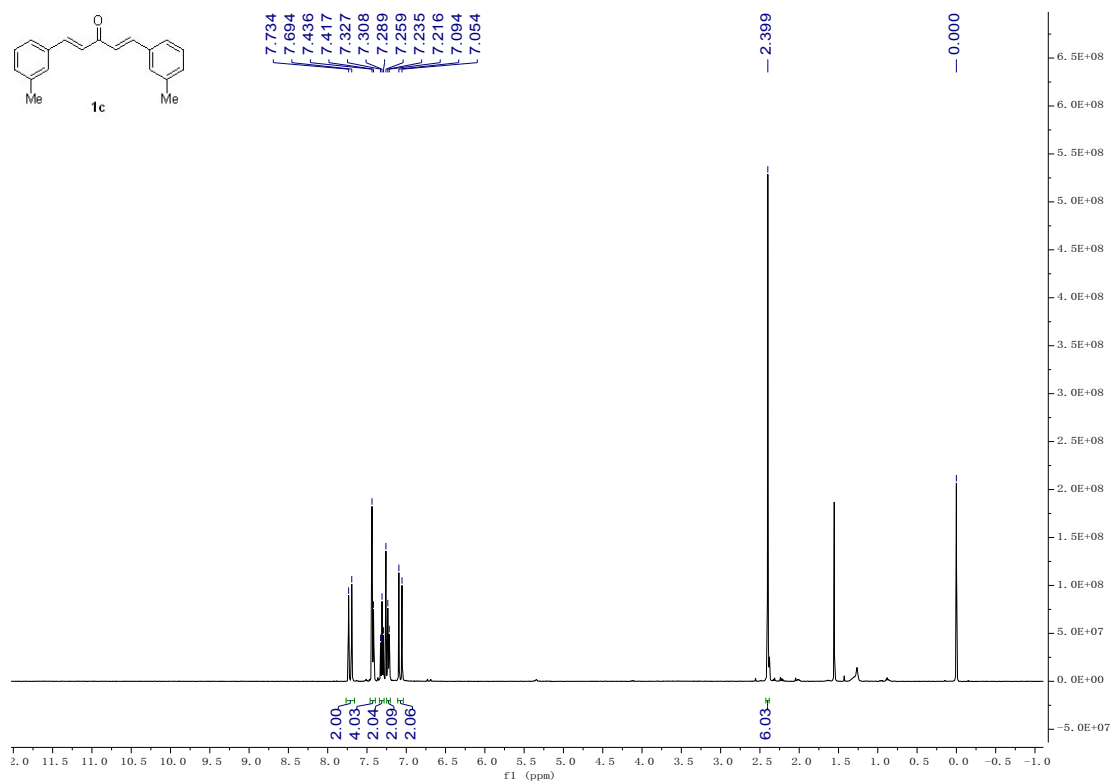

$^{13}\text{C}\{^1\text{H}\}$  NMR (100 MHz,  $\text{CDCl}_3$ )

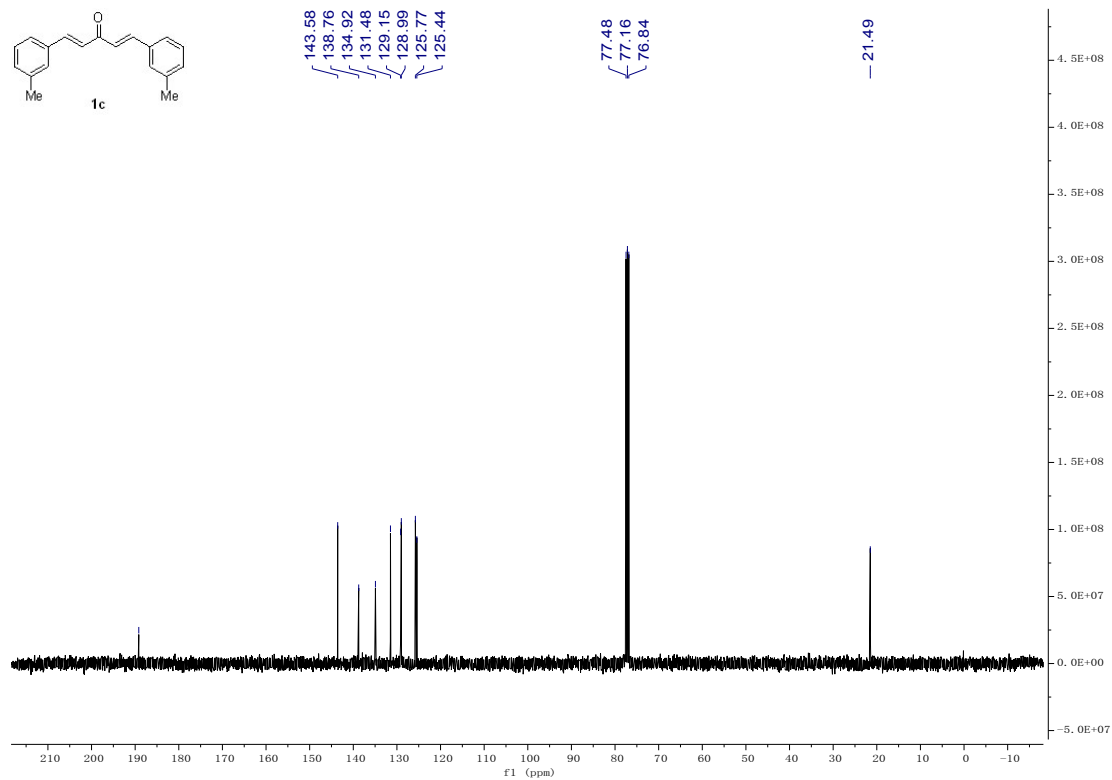

(1E,4E)-1,5-bis(3-(trifluoromethyl)phenyl)penta-1,4-dien-3-one (**1k**)

<sup>1</sup>H NMR (400 MHz, CDCl<sub>3</sub>)

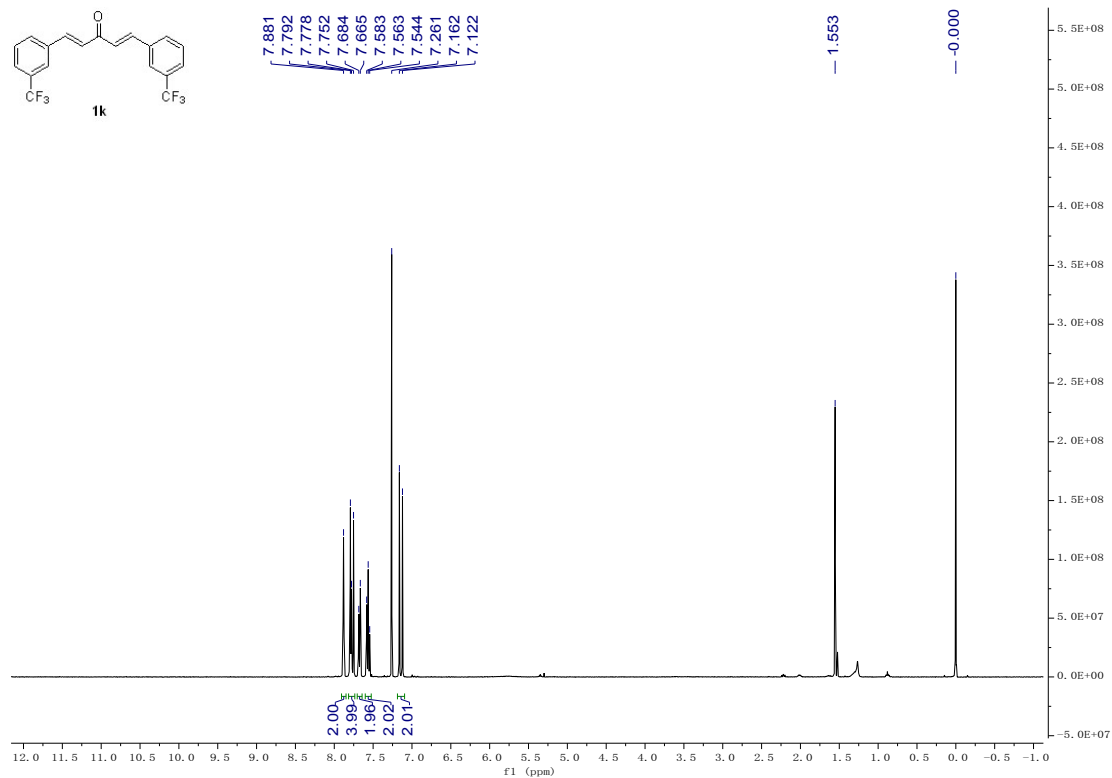

<sup>13</sup>C{<sup>1</sup>H} NMR (150 MHz, CDCl<sub>3</sub>)

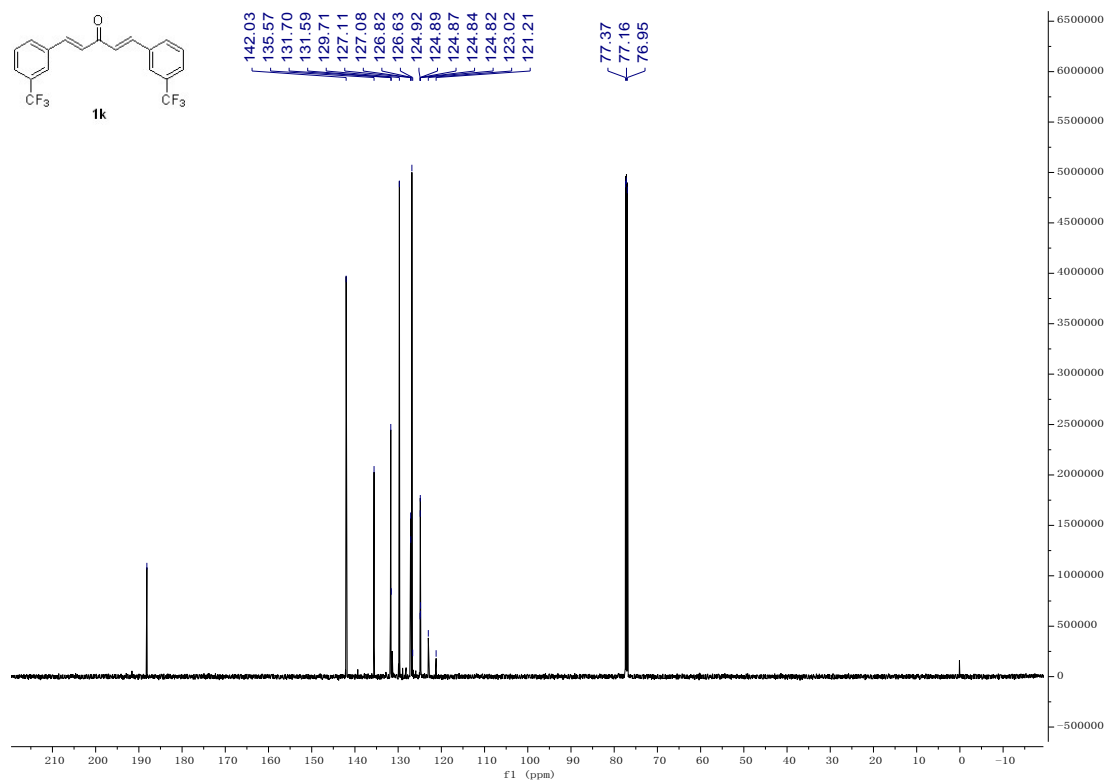



$^{19}\text{F}\{^1\text{H}\}$  NMR (376 MHz,  $\text{CDCl}_3$ )

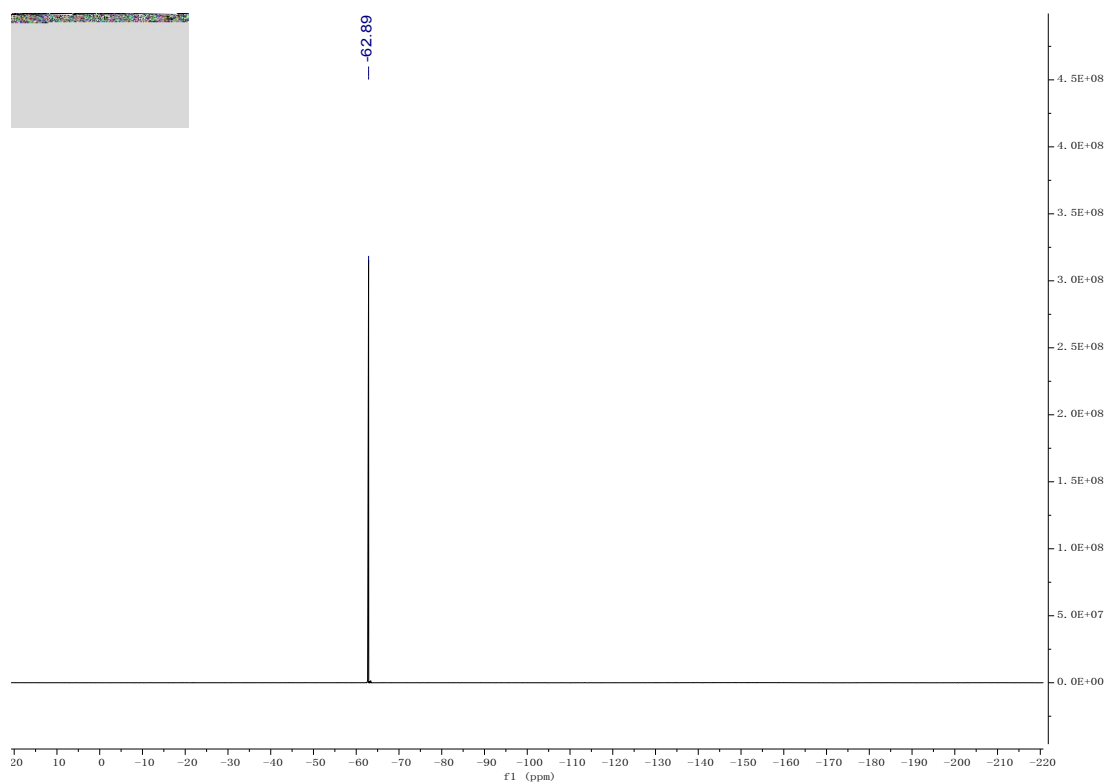

*(1E,4E)*-1,5-bis(2-bromo-5-methoxyphenyl)penta-1,4-dien-3-one (**11**)

$^1\text{H}$  NMR (400 MHz,  $\text{CDCl}_3$ )

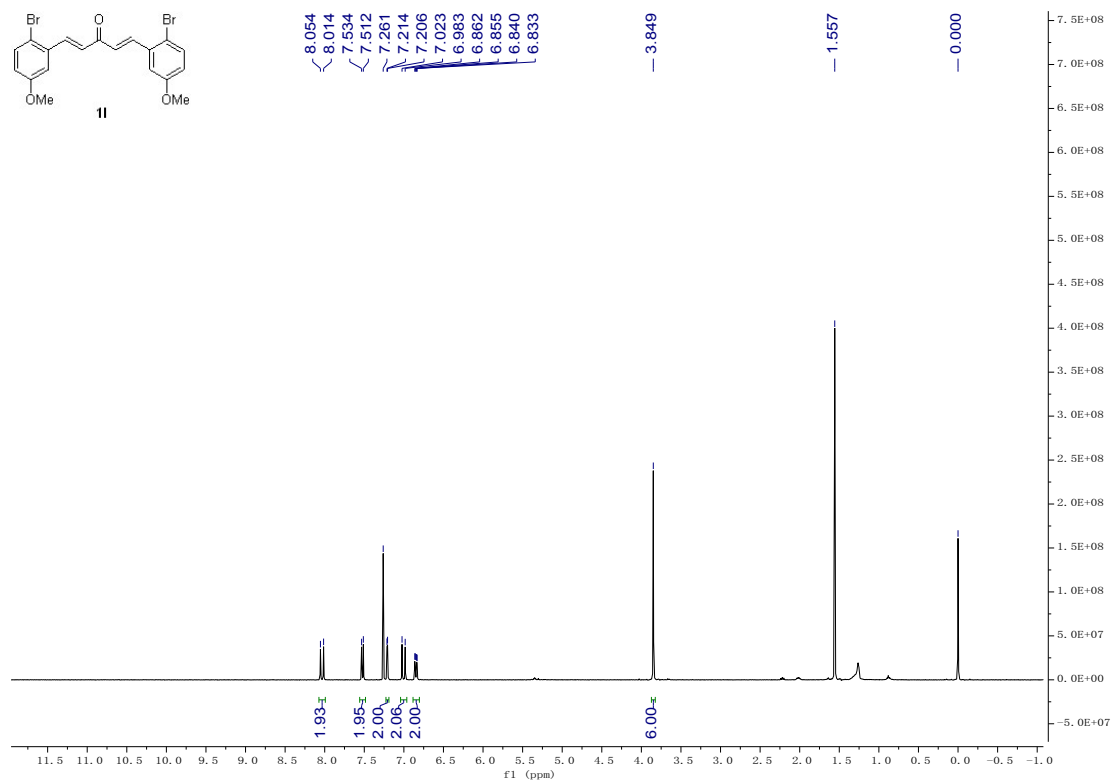

$^{13}\text{C}\{^1\text{H}\}$  NMR (100 MHz,  $\text{CDCl}_3$ )

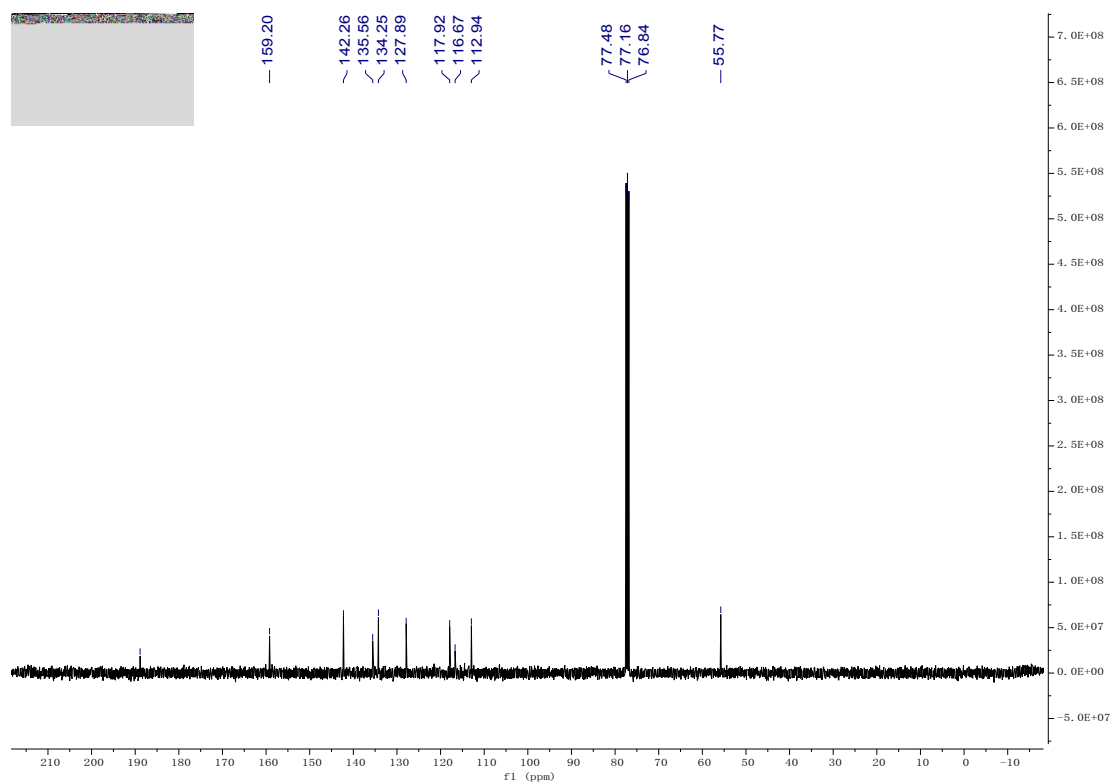

*(1E,4E)*-1,7-diphenylhepta-1,4-dien-3-one (**1t**)

$^1\text{H}$  NMR (400 MHz,  $\text{CDCl}_3$ )

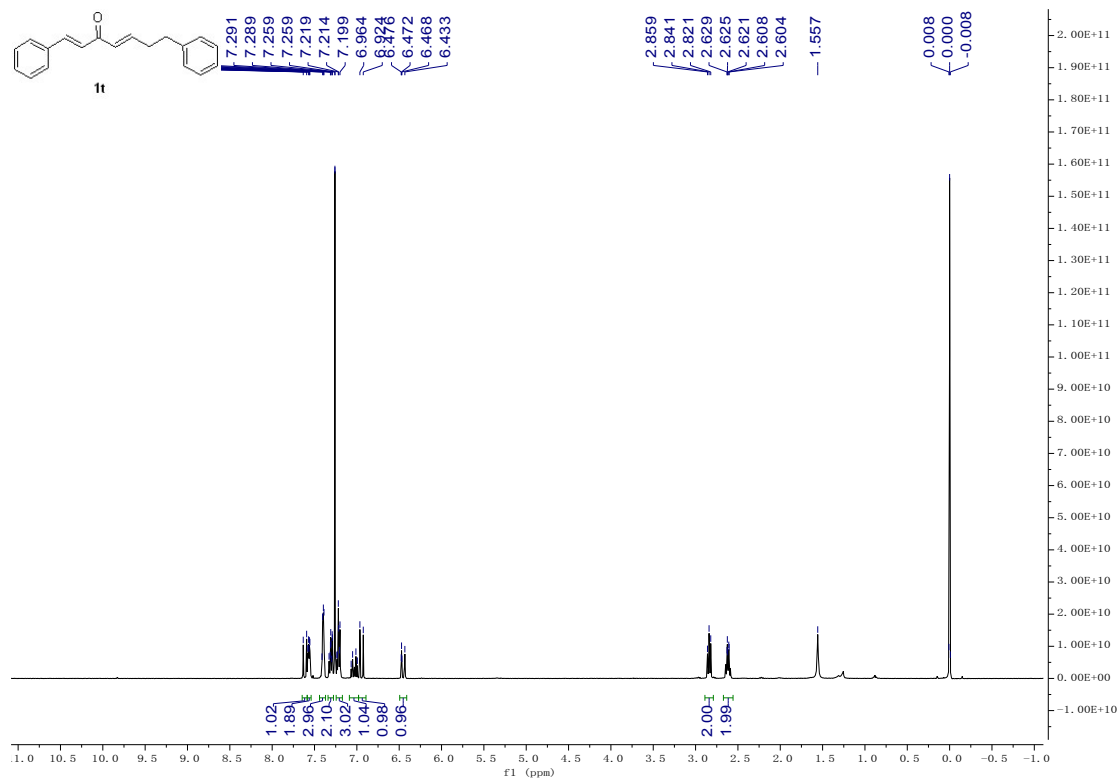

$^{13}\text{C}\{^1\text{H}\}$  NMR (150 MHz,  $\text{CDCl}_3$ )

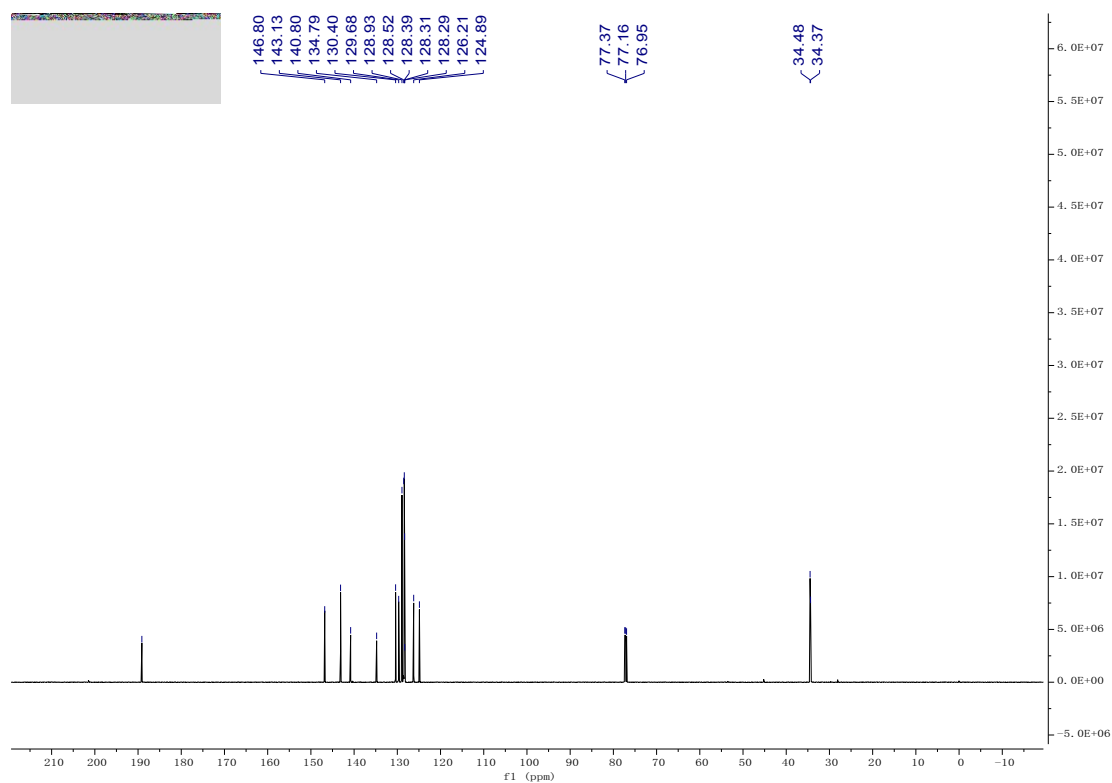

*(1E,3S,7S,8E)*-1,3,7,9-tetraphenylnona-1,8-dien-5-one (**3aa**)

$^1\text{H}$  NMR (400 MHz,  $\text{CDCl}_3$ )

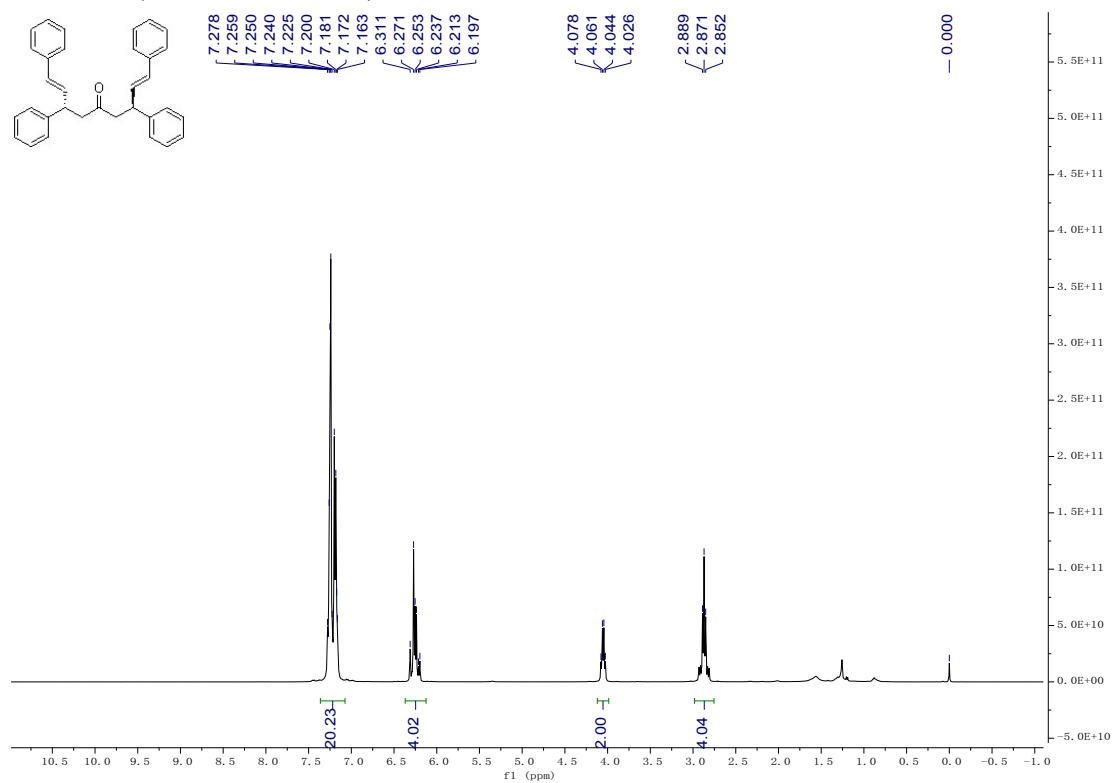

$^{13}\text{C}\{^1\text{H}\}$  NMR (150 MHz,  $\text{CDCl}_3$ )

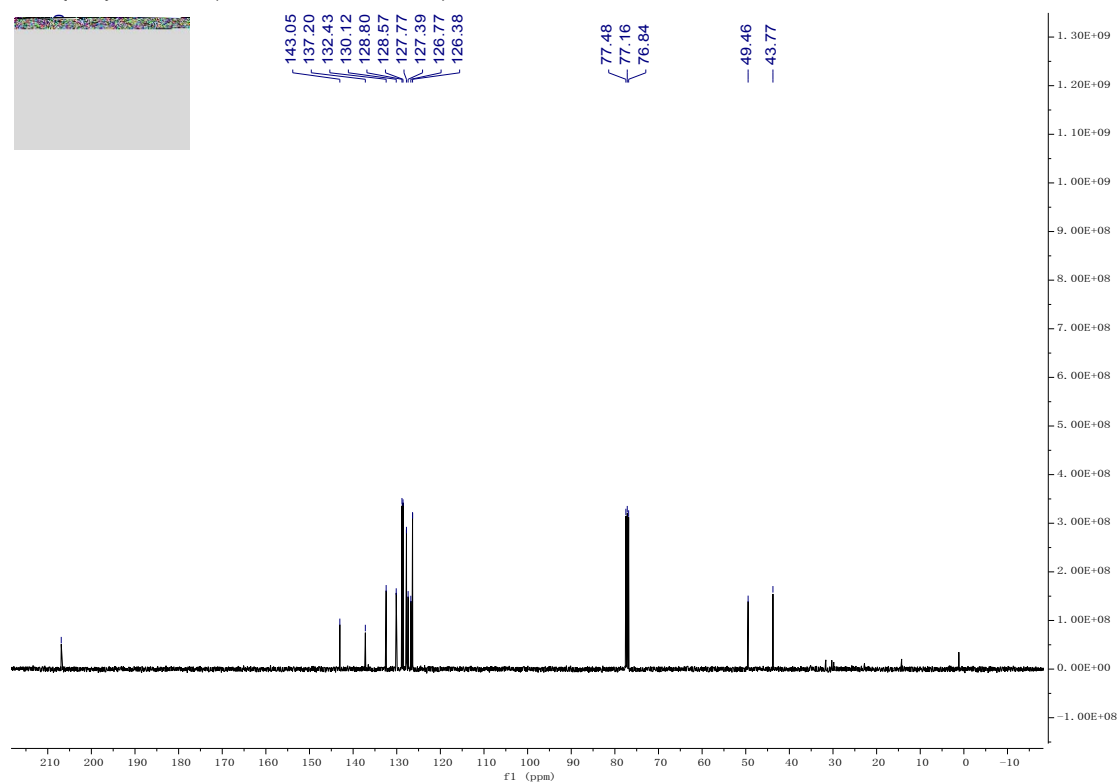

(1*E*,3*S*,7*S*,8*E*)-1,9-diphenyl-3,7-di-*p*-tolylnona-1,8-dien-5-one (**3ba**)

$^1\text{H}$  NMR (400 MHz,  $\text{CDCl}_3$ )

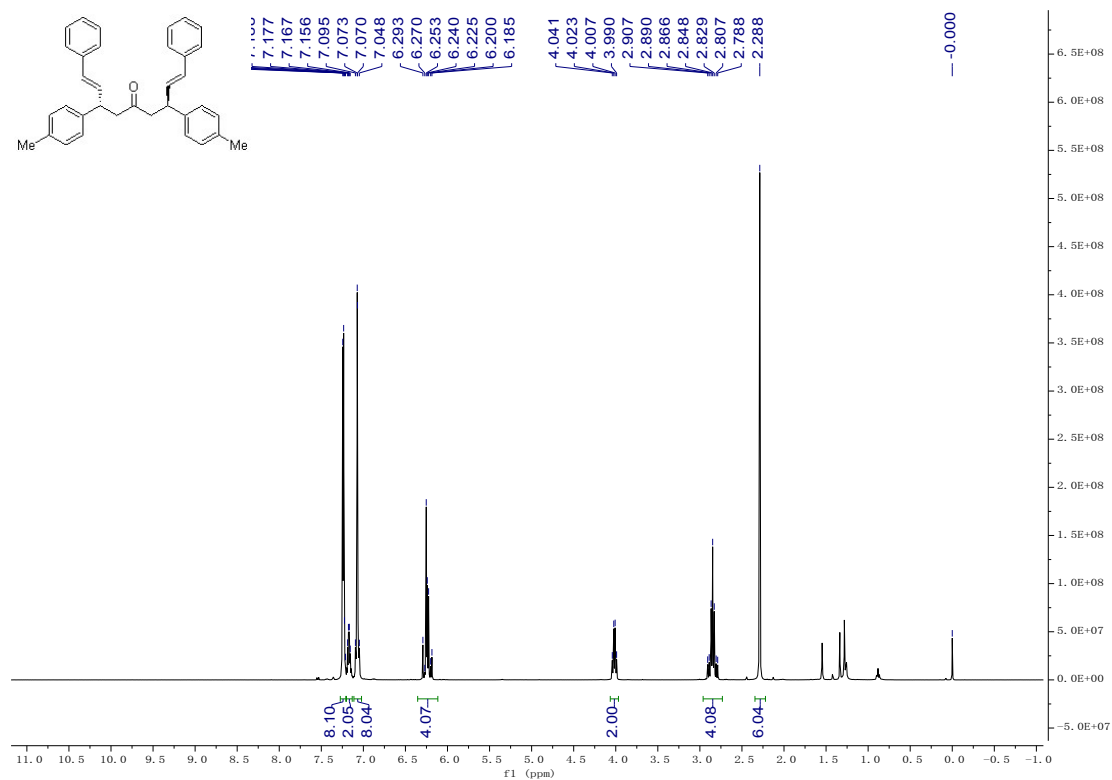

$^{13}\text{C}\{^1\text{H}\}$  NMR (100 MHz,  $\text{CDCl}_3$ )

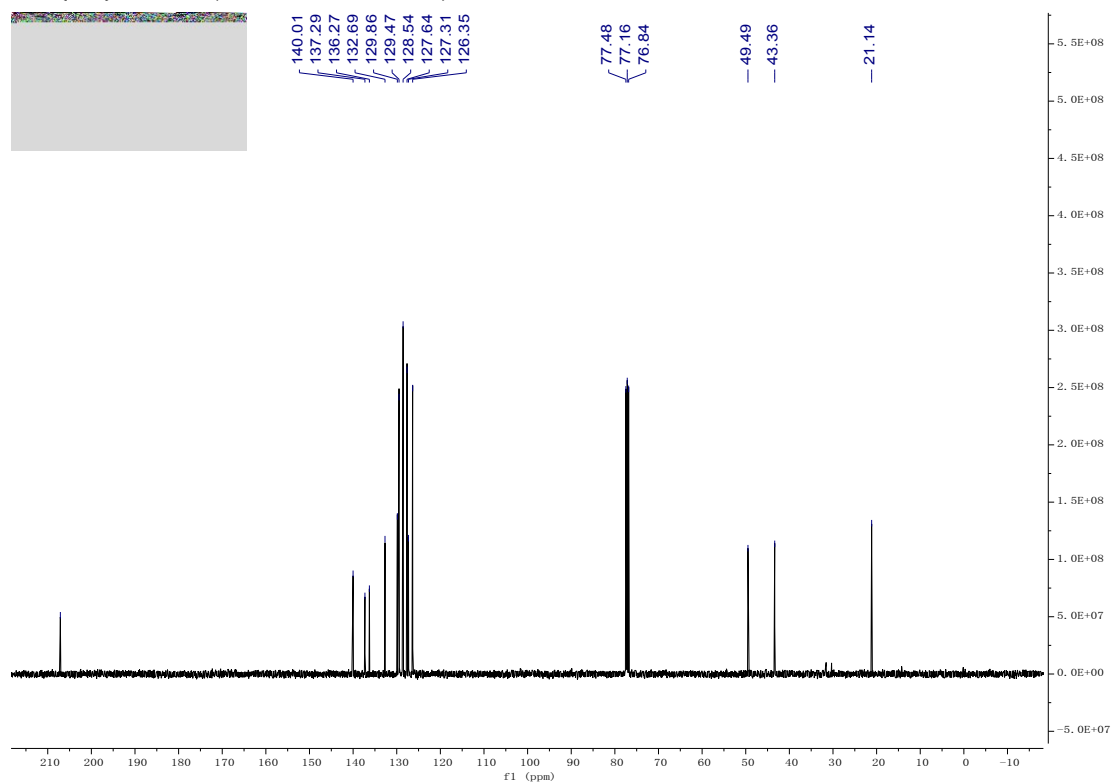

$(1E,3S,7S,8E)$ -1,9-diphenyl-3,7-di-*m*-tolylnona-1,8-dien-5-one (3ca)

$^1\text{H}$  NMR (400 MHz,  $\text{CDCl}_3$ )

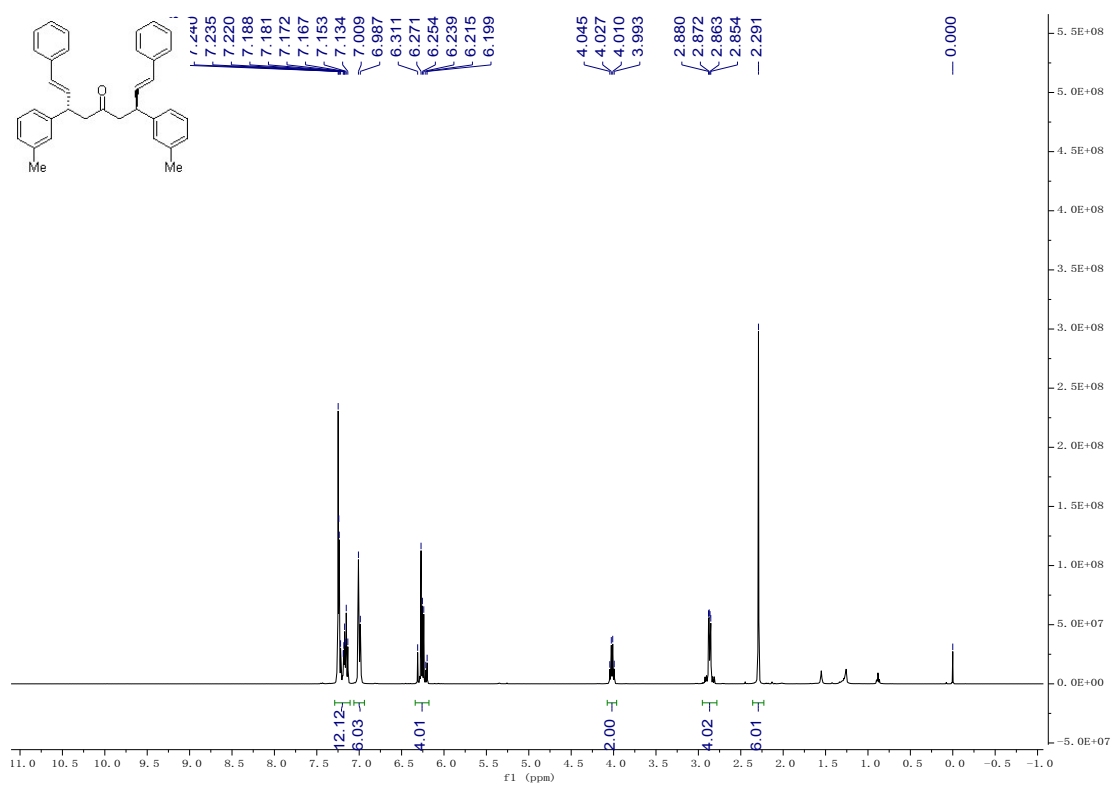

$^{13}\text{C}\{^1\text{H}\}$  NMR (100 MHz,  $\text{CDCl}_3$ )

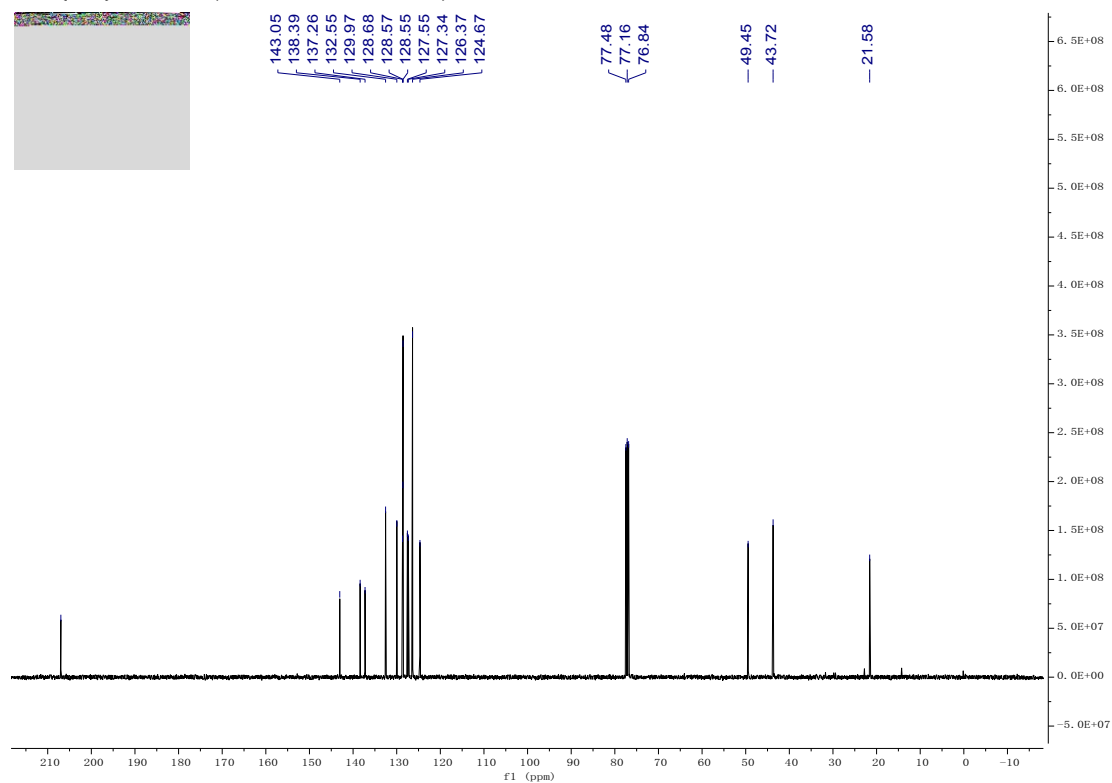

*(1E,3S,7S,8E)*-1,9-diphenyl-3,7-di-*o*-tolylnona-1,8-dien-5-one (**3da**)

$^1\text{H}$  NMR (400 MHz,  $\text{CDCl}_3$ )

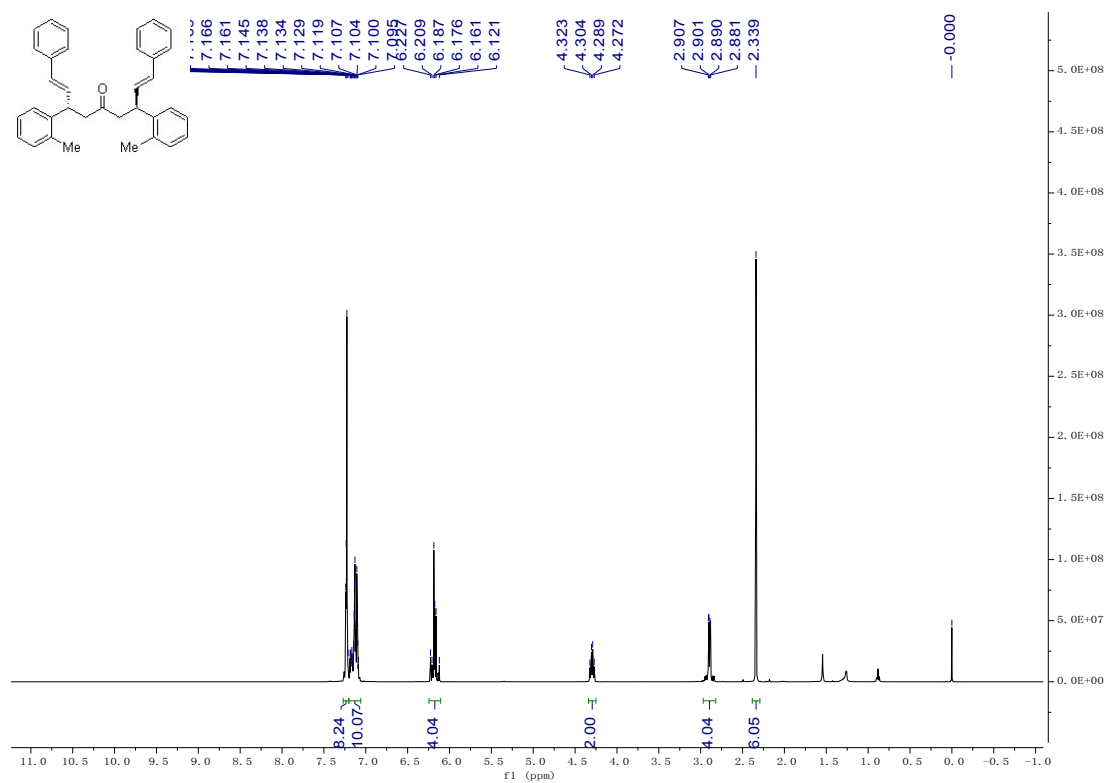

$^{13}\text{C}\{^1\text{H}\}$  NMR (100 MHz,  $\text{CDCl}_3$ )

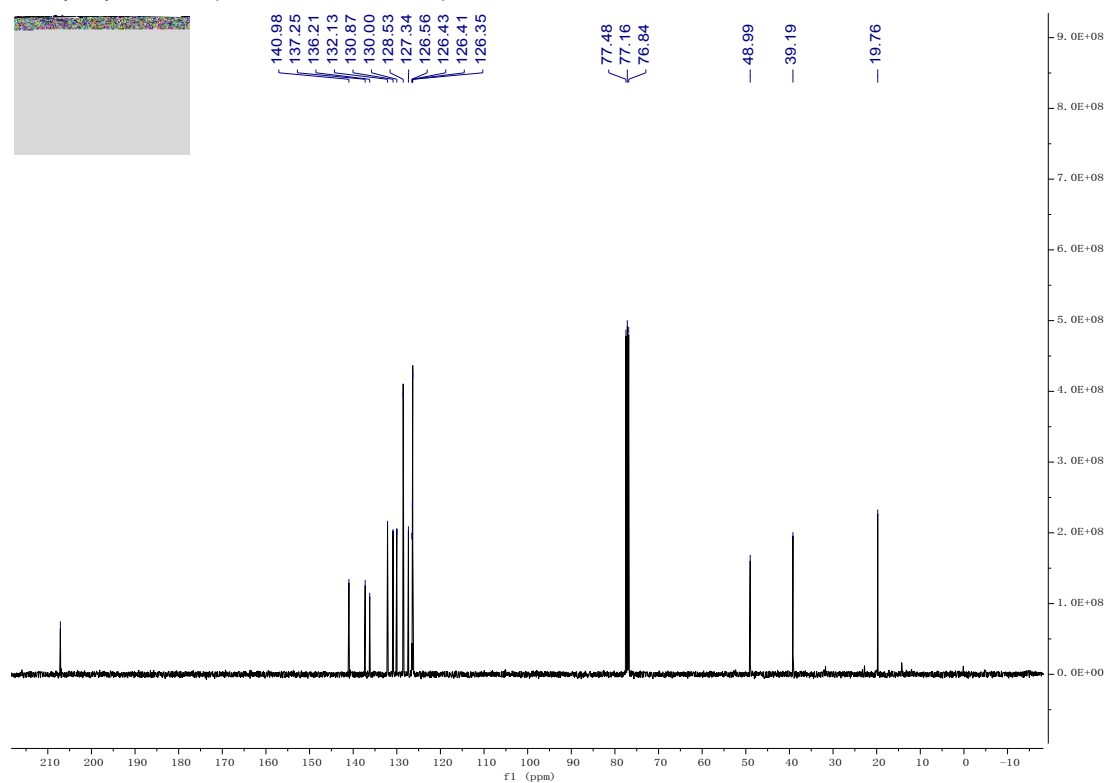

$(1E,3S,7S,8E)$ -3,7-bis(4-methoxyphenyl)-1,9-diphenylnona-1,8-dien-5-one (3ea)

$^1\text{H}$  NMR (400 MHz,  $\text{CDCl}_3$ )

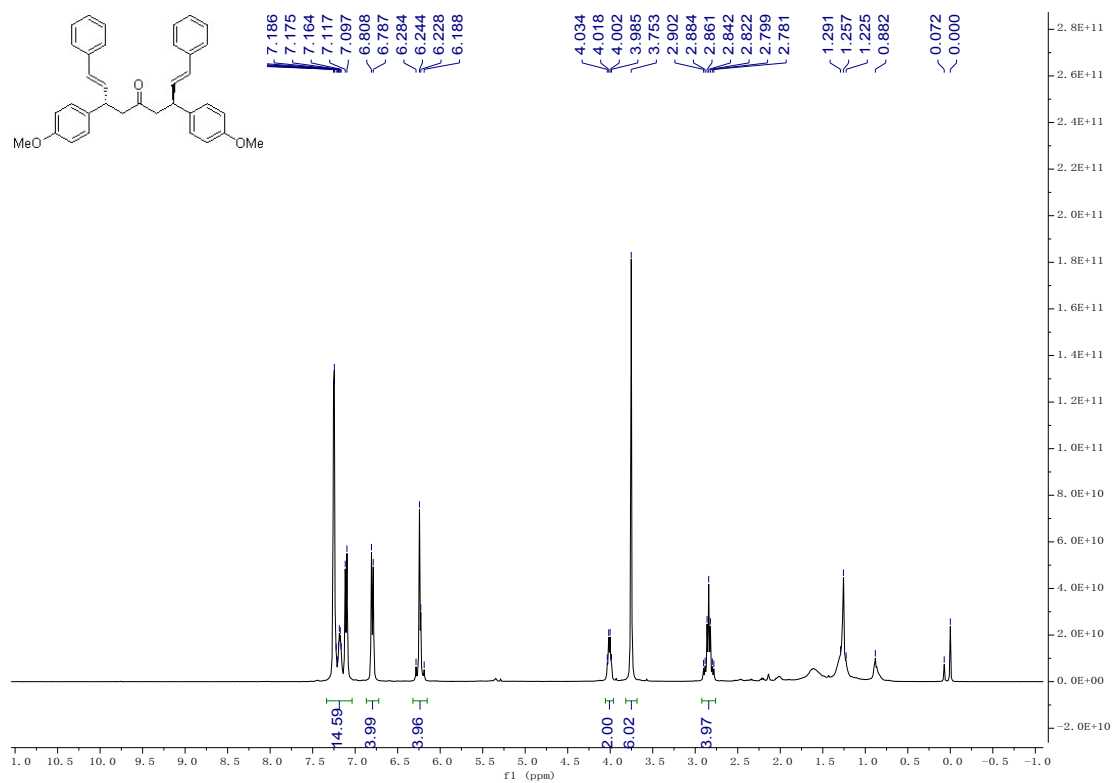

$^{13}\text{C}\{^1\text{H}\}$  NMR (100 MHz,  $\text{CDCl}_3$ )

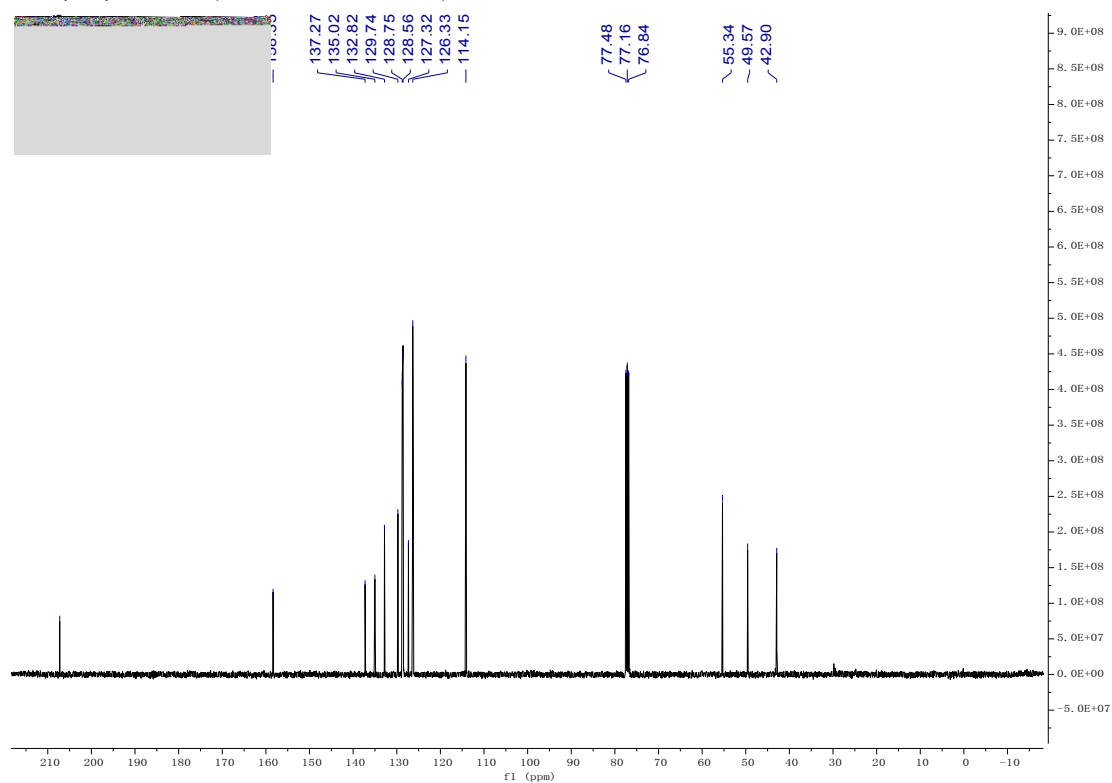

*(1E,3S,7S,8E)-3,7-bis(2-methoxyphenyl)-1,9-diphenylnona-1,8-dien-5-one (3fa)*

$^1\text{H}$  NMR (400 MHz,  $\text{CDCl}_3$ )

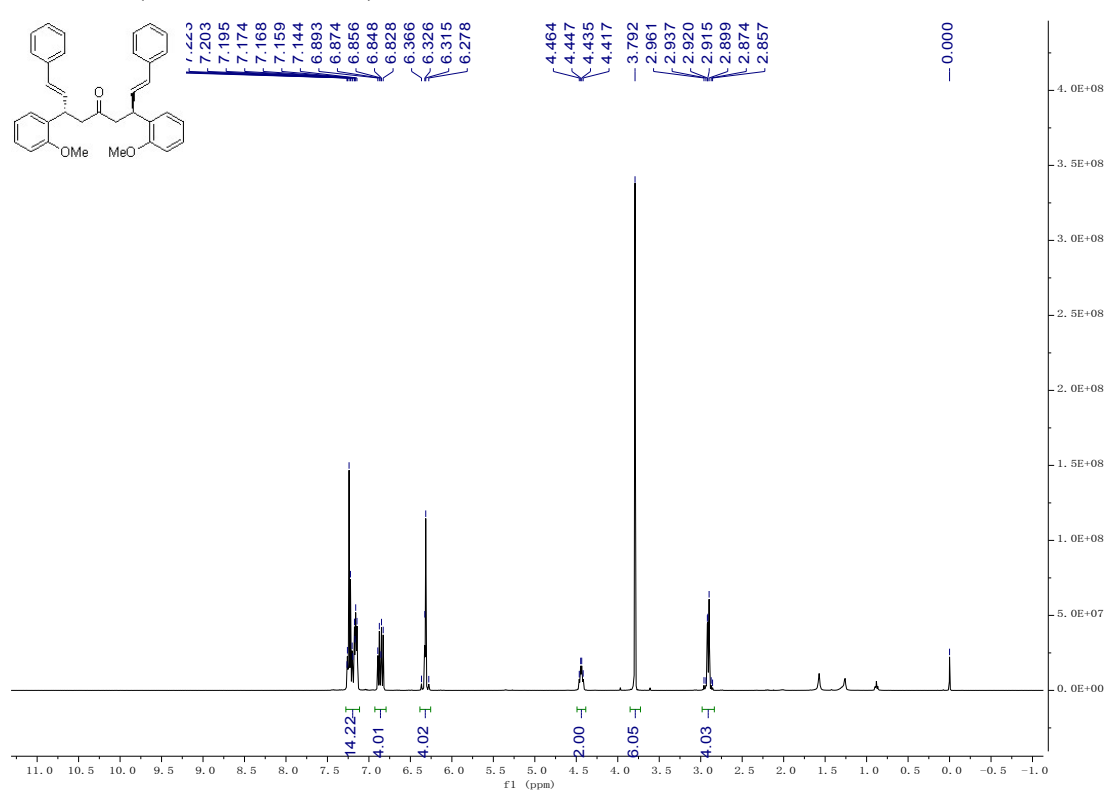



$^{13}\text{C}\{^1\text{H}\}$  NMR (100 MHz,  $\text{CDCl}_3$ )

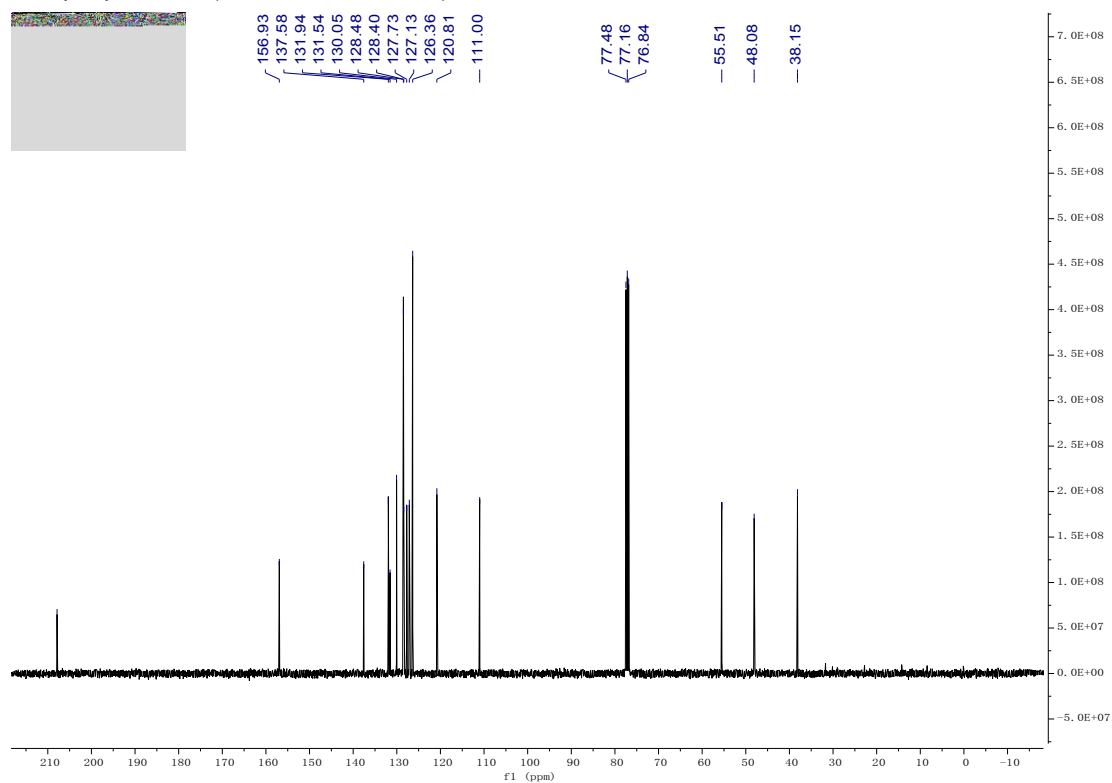

(1*E*,3*S*,7*S*,8*E*)-3,7-bis(4-fluorophenyl)-1,9-diphenylnona-1,8-dien-5-one (**3ga**)

$^1\text{H}$  NMR (400 MHz,  $\text{CDCl}_3$ )

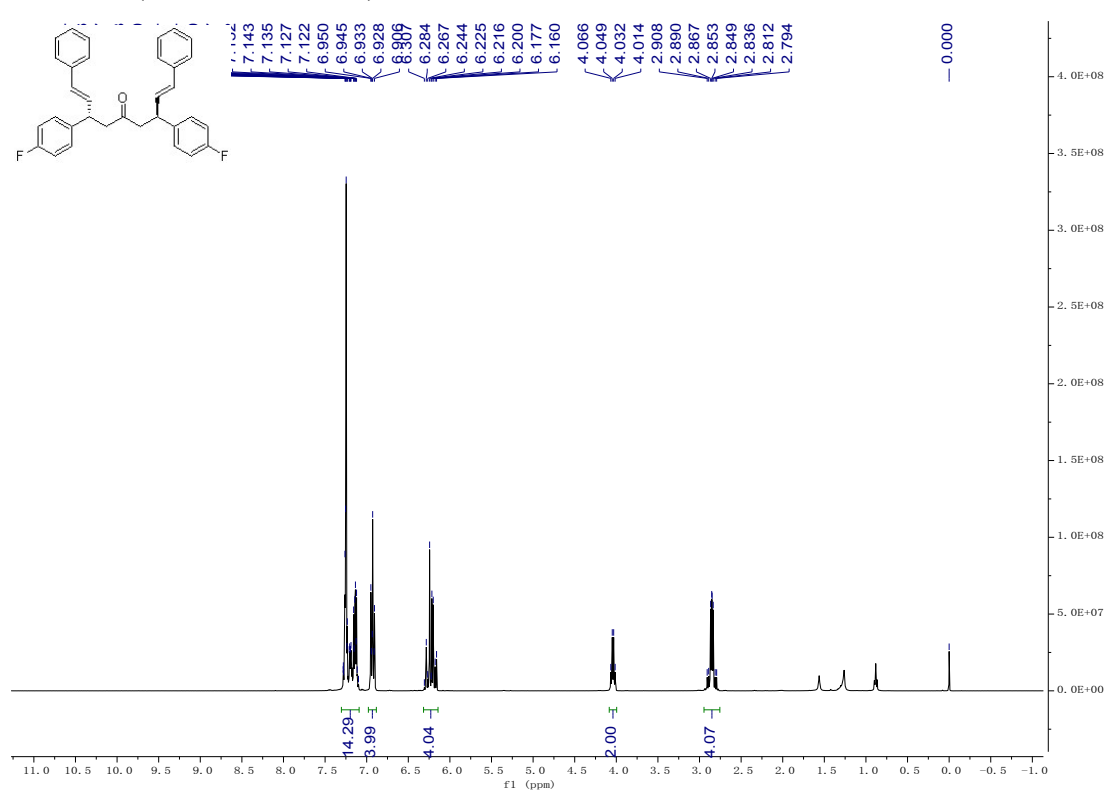

$^{13}\text{C}\{^1\text{H}\}$  NMR (100 MHz,  $\text{CDCl}_3$ )

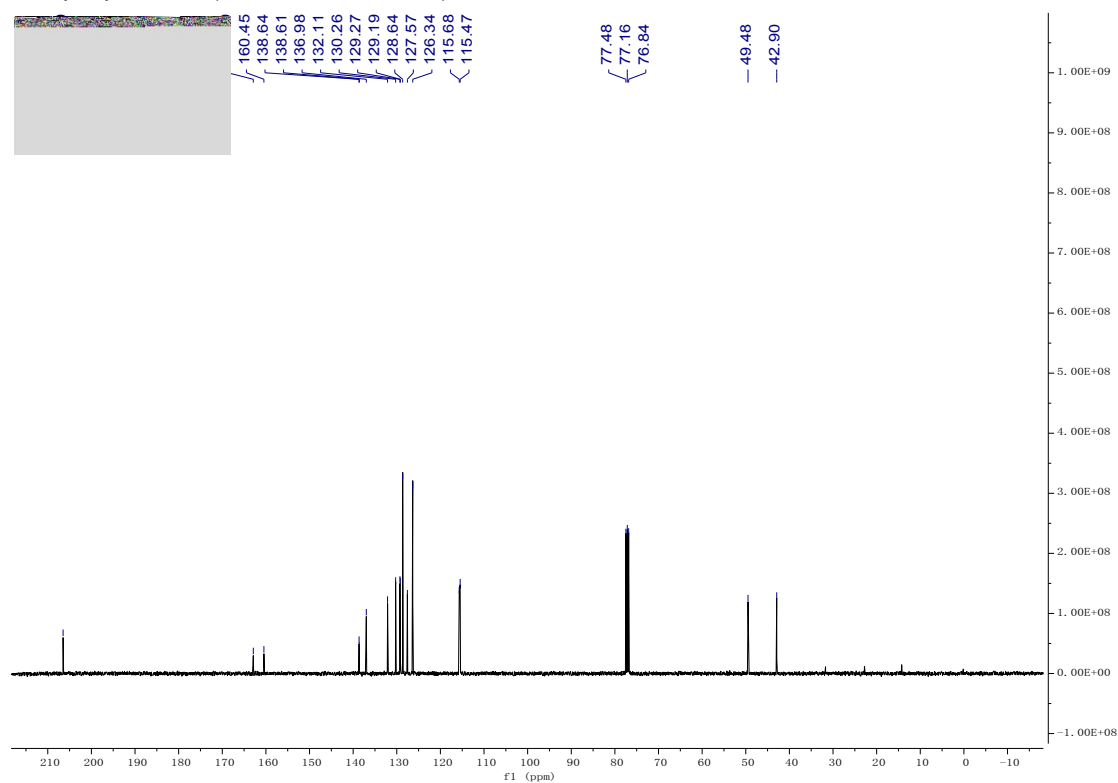

$^{19}\text{F}\{^1\text{H}\}$  NMR (376 MHz,  $\text{CDCl}_3$ )

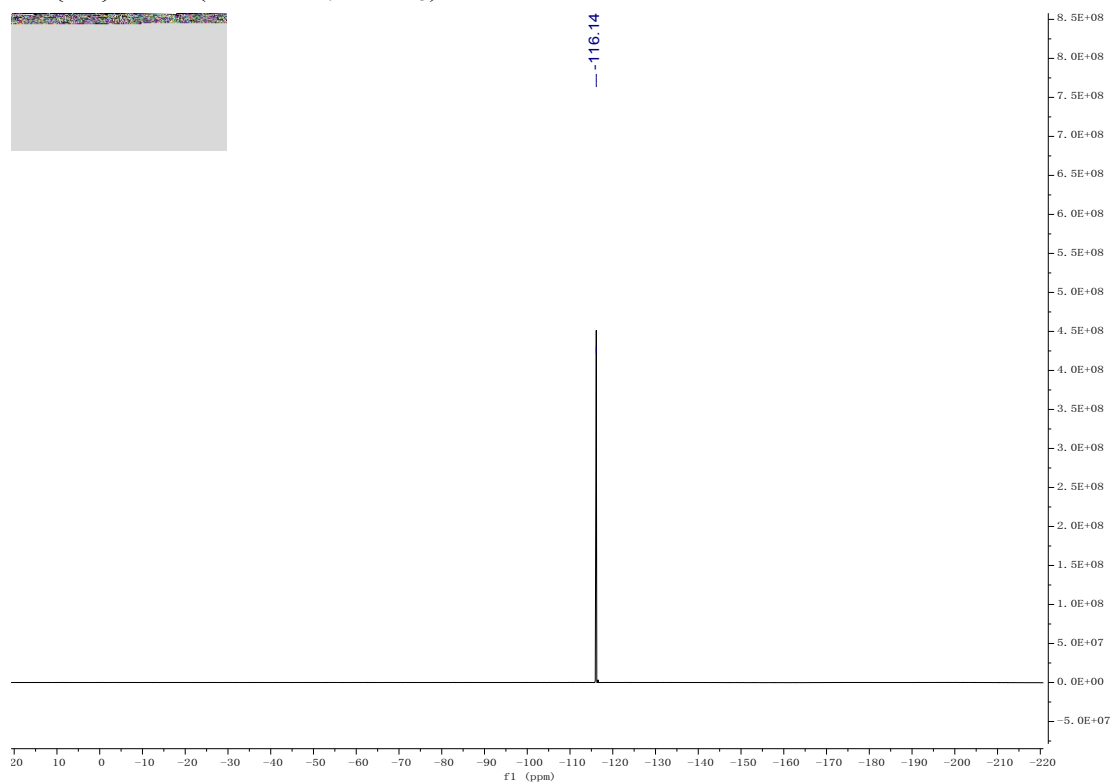

(1E,3S,7S,8E)-3,7-bis(4-chlorophenyl)-1,9-diphenylnona-1,8-dien-5-one (3ha)

<sup>1</sup>H NMR (600 MHz, CDCl<sub>3</sub>)

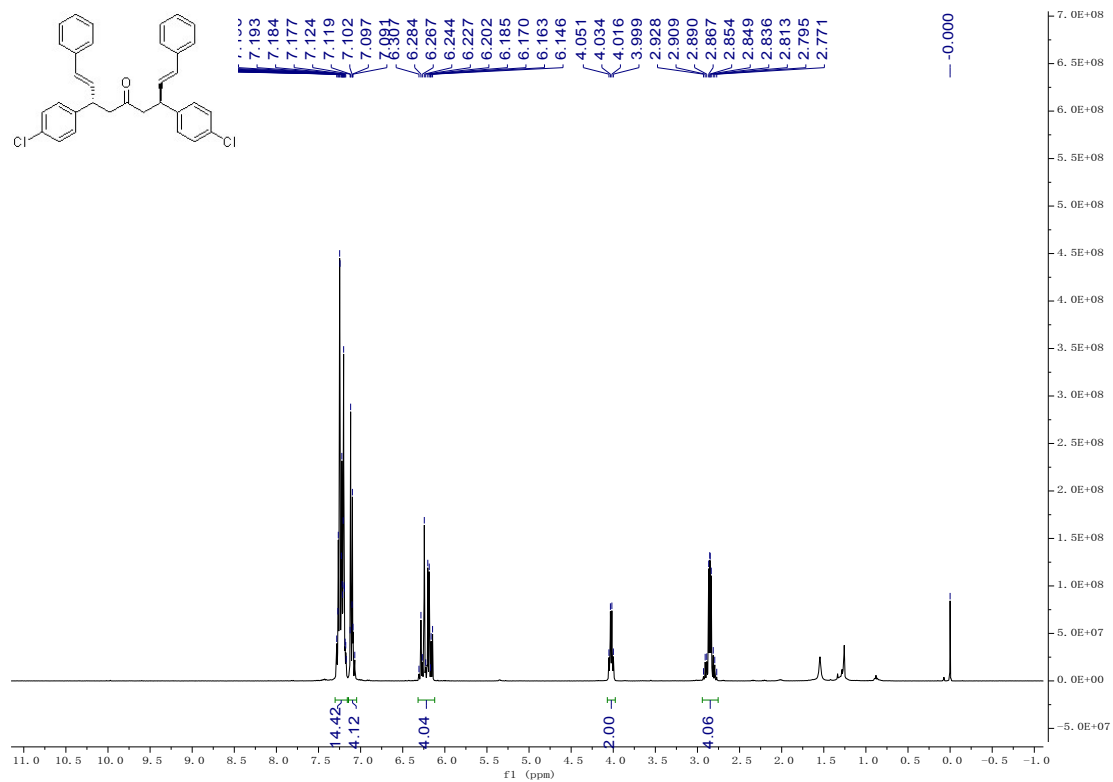

<sup>13</sup>C {<sup>1</sup>H} NMR (150 MHz, CDCl<sub>3</sub>)

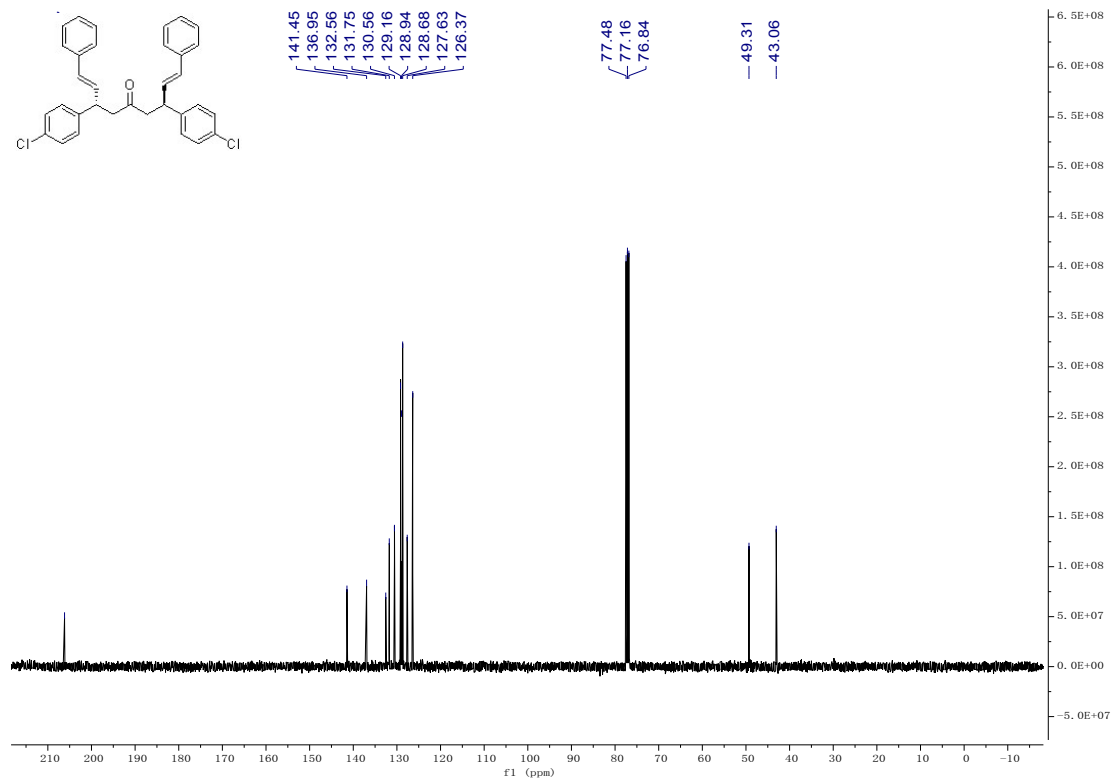

(1*E*,3*S*,7*S*,8*E*)-3,7-bis(2-chlorophenyl)-1,9-diphenylnona-1,8-dien-5-one (**3ia**)

$^1\text{H}$  NMR (600 MHz,  $\text{CDCl}_3$ )

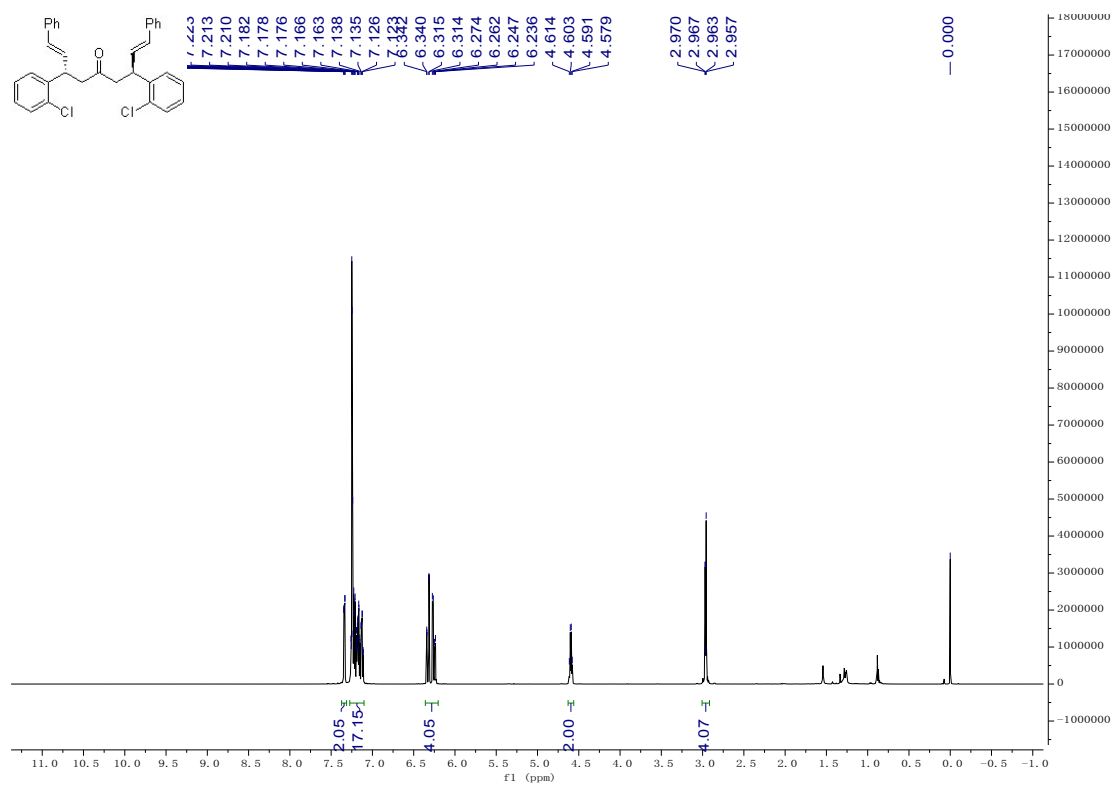

$^{13}\text{C}\{^1\text{H}\}$  NMR (150 MHz,  $\text{CDCl}_3$ )

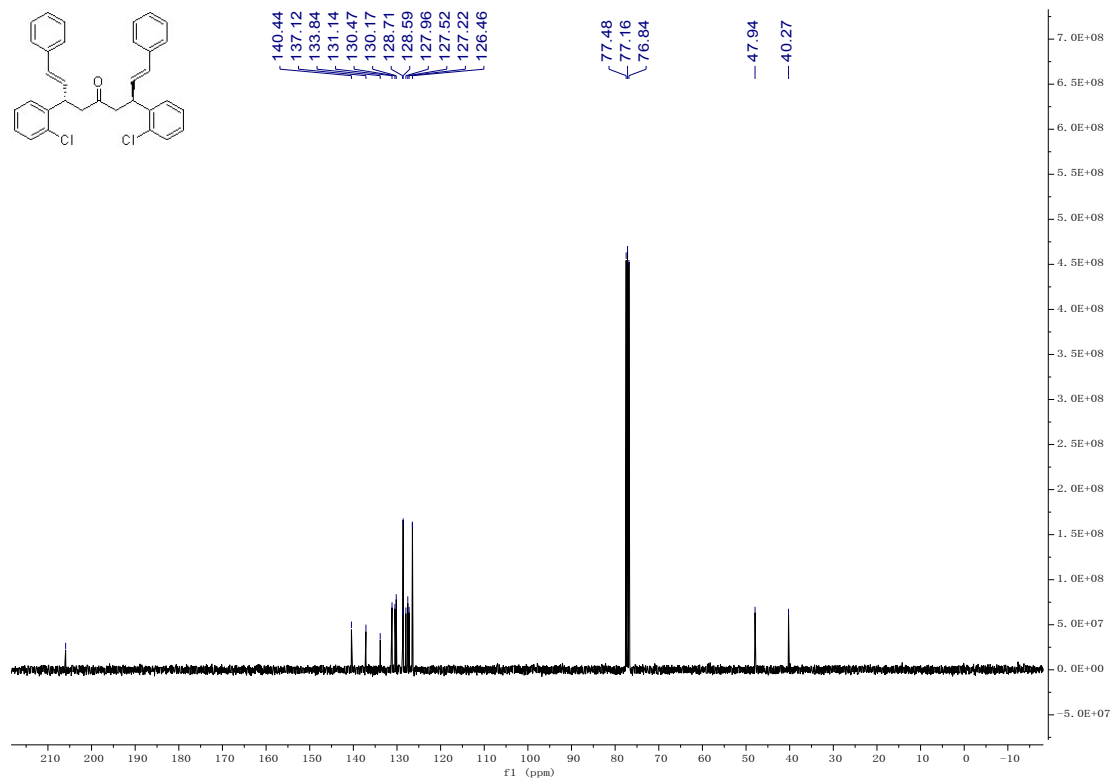

*(1E,3S,7S,8E)*-3,7-bis(4-bromophenyl)-1,9-diphenylnona-1,8-dien-5-one (**3ja**)

<sup>1</sup>H NMR (400 MHz, CDCl<sub>3</sub>)

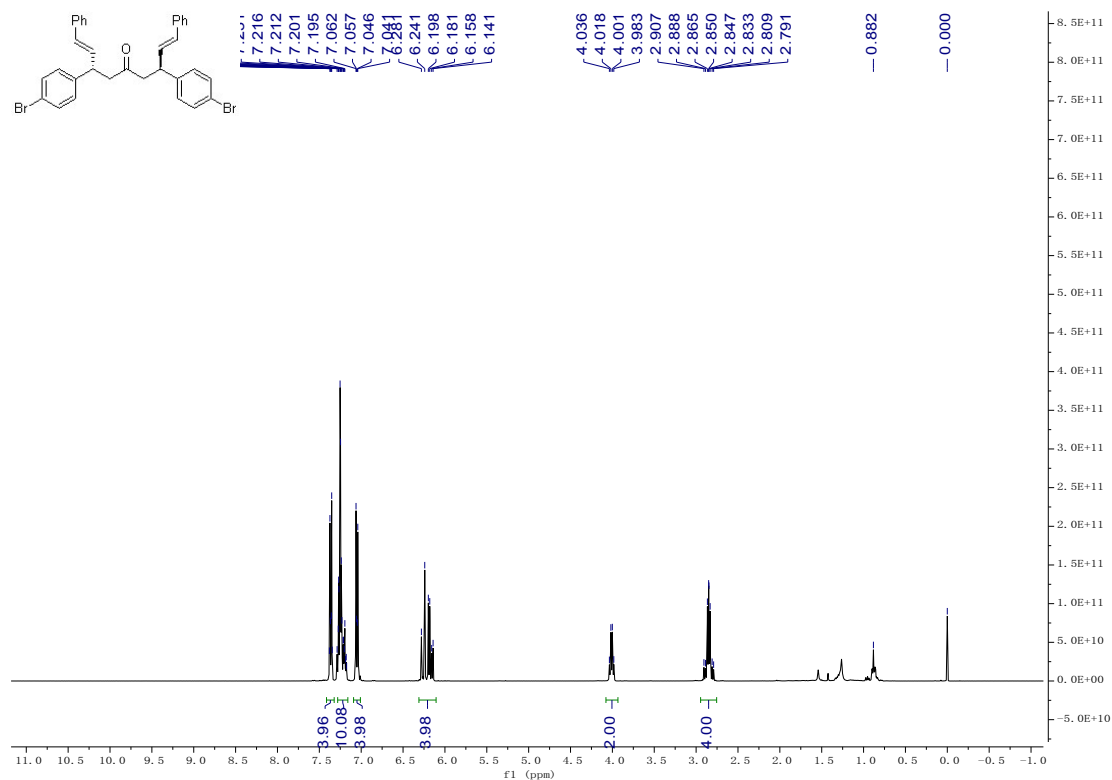

<sup>13</sup>C {<sup>1</sup>H} NMR (100 MHz, CDCl<sub>3</sub>) (n-hexane: 14.1, 22.7, 31.6.)

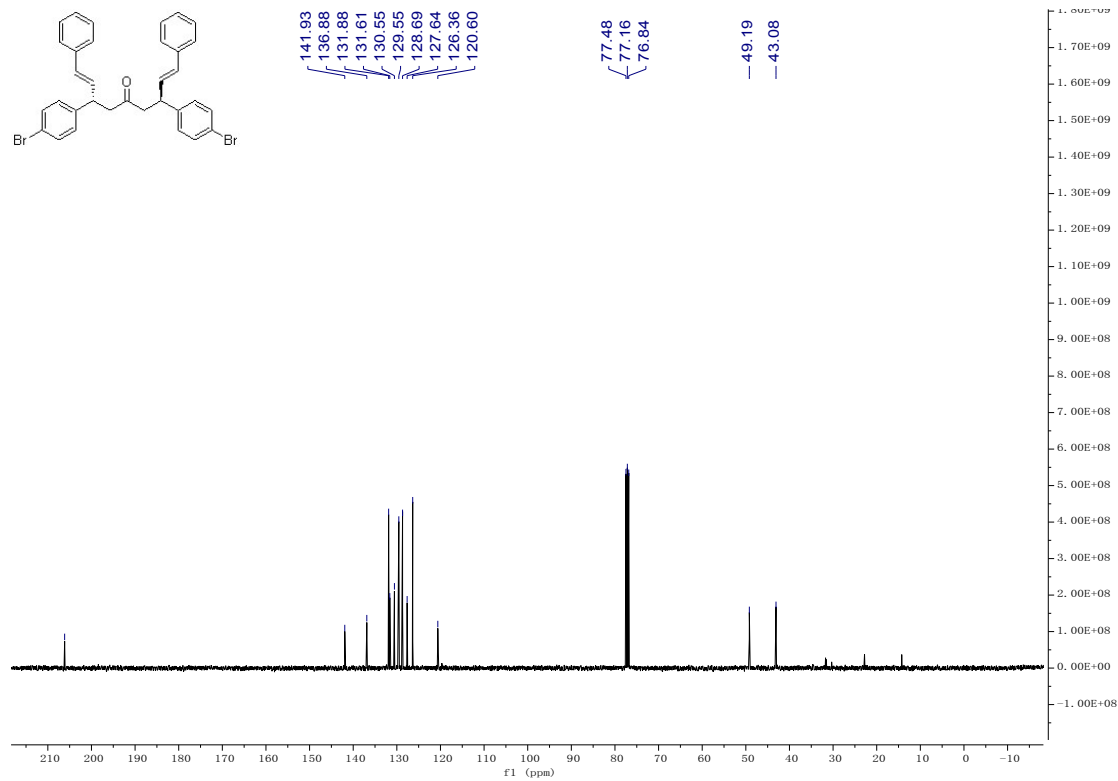

*(1E,3S,7S,8E)-1,9-diphenyl-3,7-bis(3-(trifluoromethyl)phenyl)nona-1,8-dien-5-one*

**(3ka)**

<sup>1</sup>H NMR (600 MHz, CDCl<sub>3</sub>)

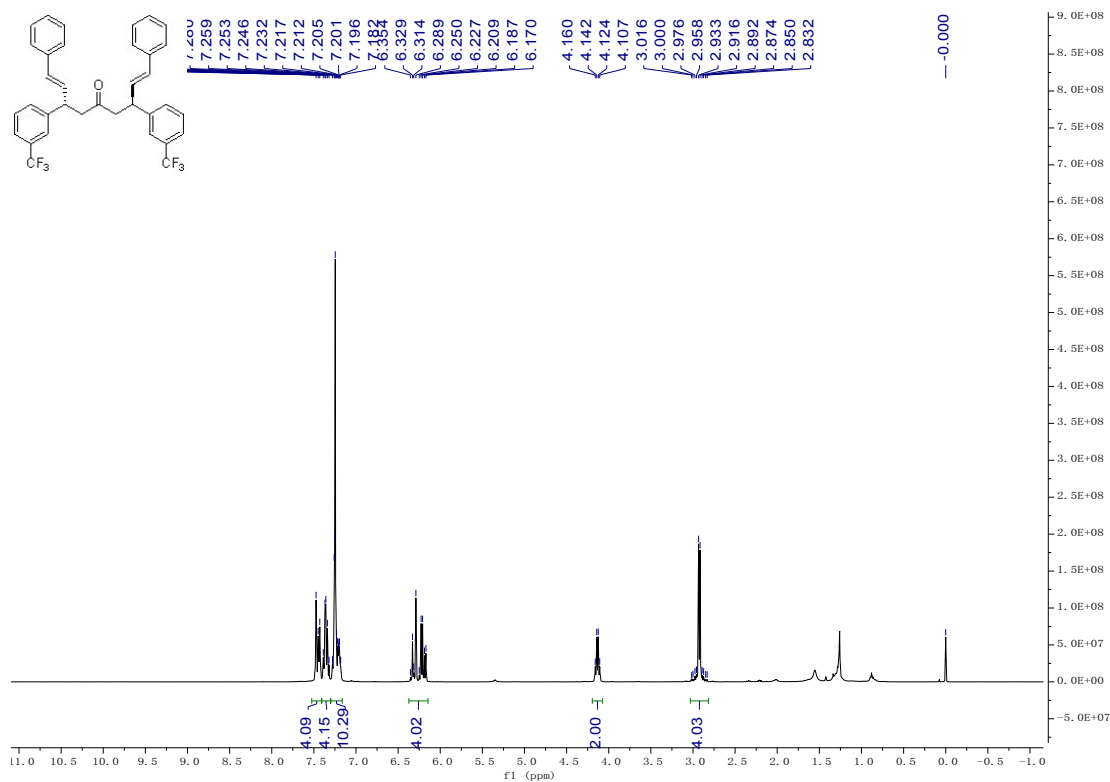

<sup>13</sup>C {<sup>1</sup>H} NMR (150 MHz, CDCl<sub>3</sub>)

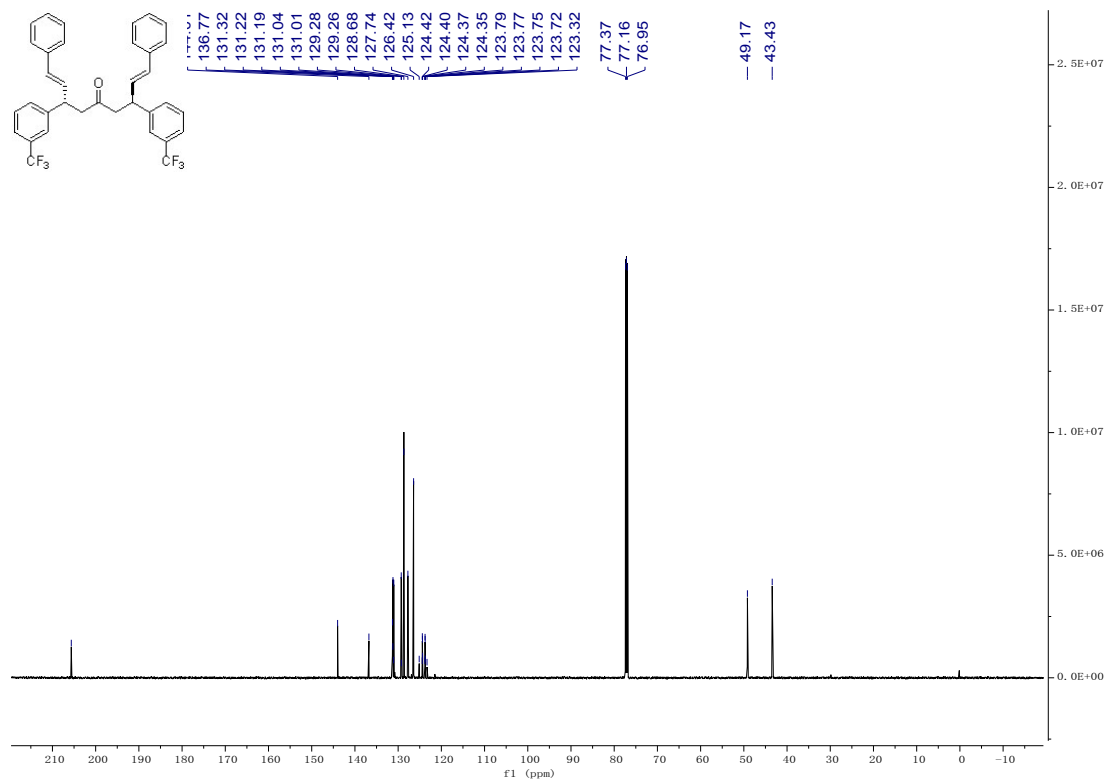

$^{19}\text{F}\{^1\text{H}\}$  NMR (564 MHz,  $\text{CDCl}_3$ )

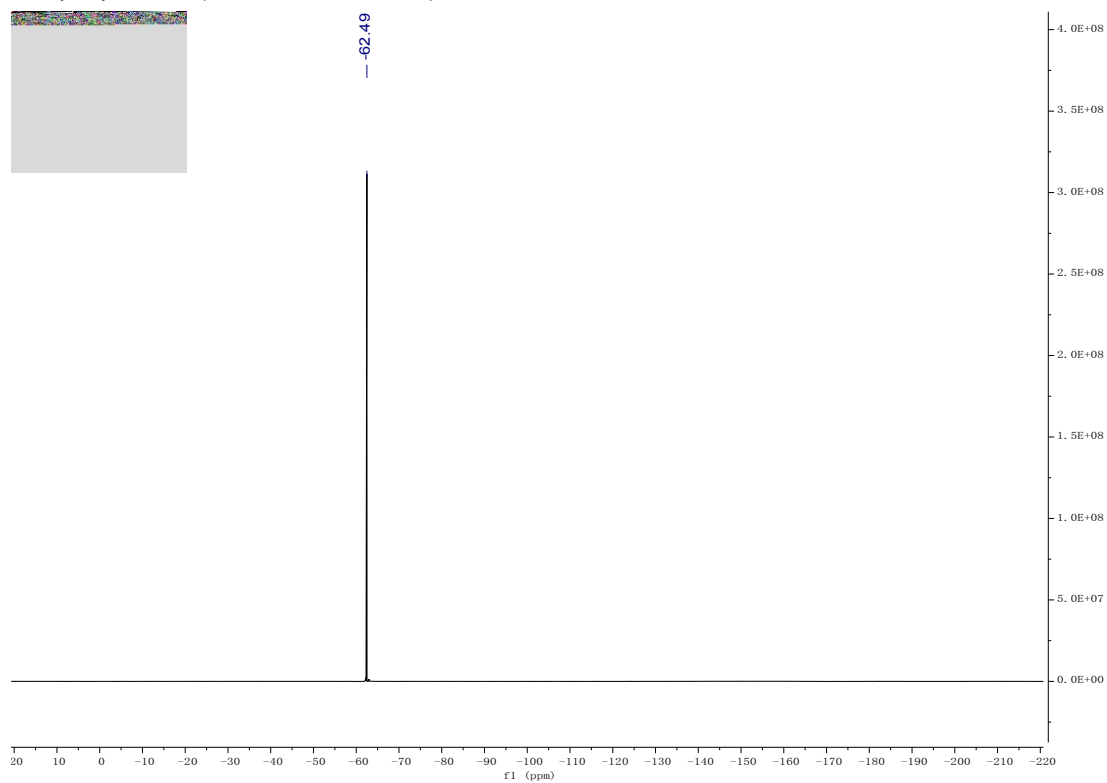

*(1E,3S,7S,8E)*-3,7-bis(2-bromo-5-methoxyphenyl)-1,9-diphenylnona-1,8-dien-5-one  
**(3la)**

$^1\text{H}$  NMR (600 MHz,  $\text{CDCl}_3$ )

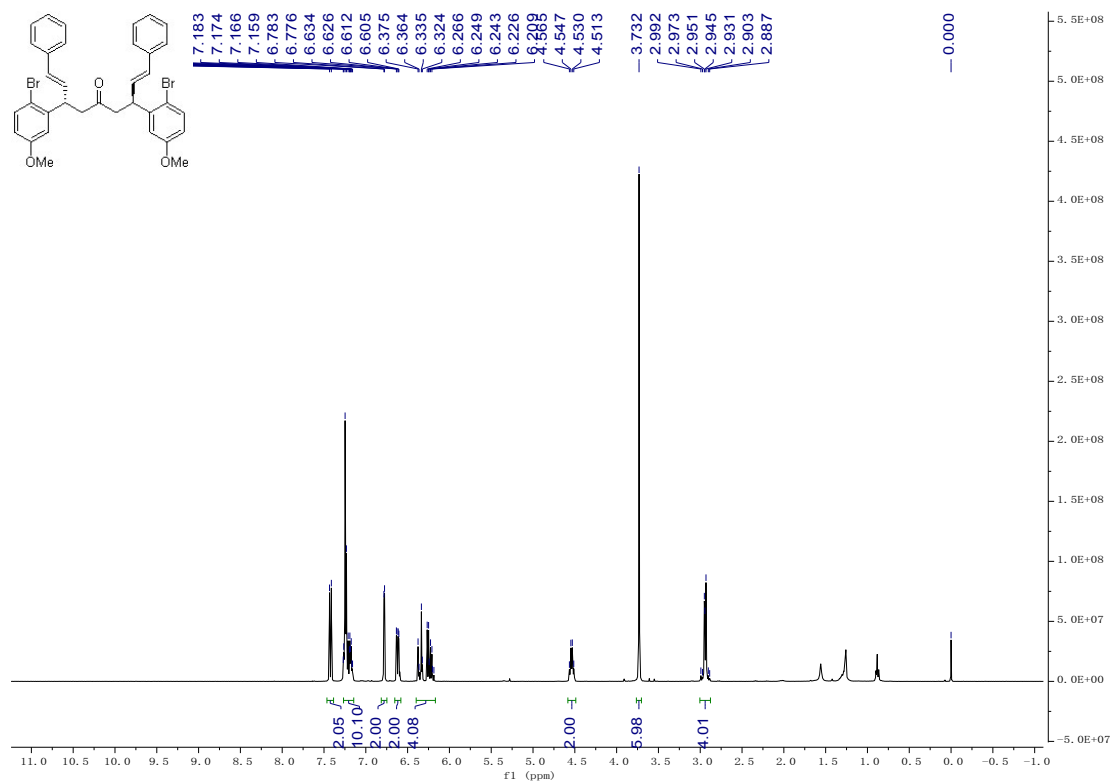

$^{13}\text{C}\{^1\text{H}\}$  NMR (100 MHz,  $\text{CDCl}_3$ )

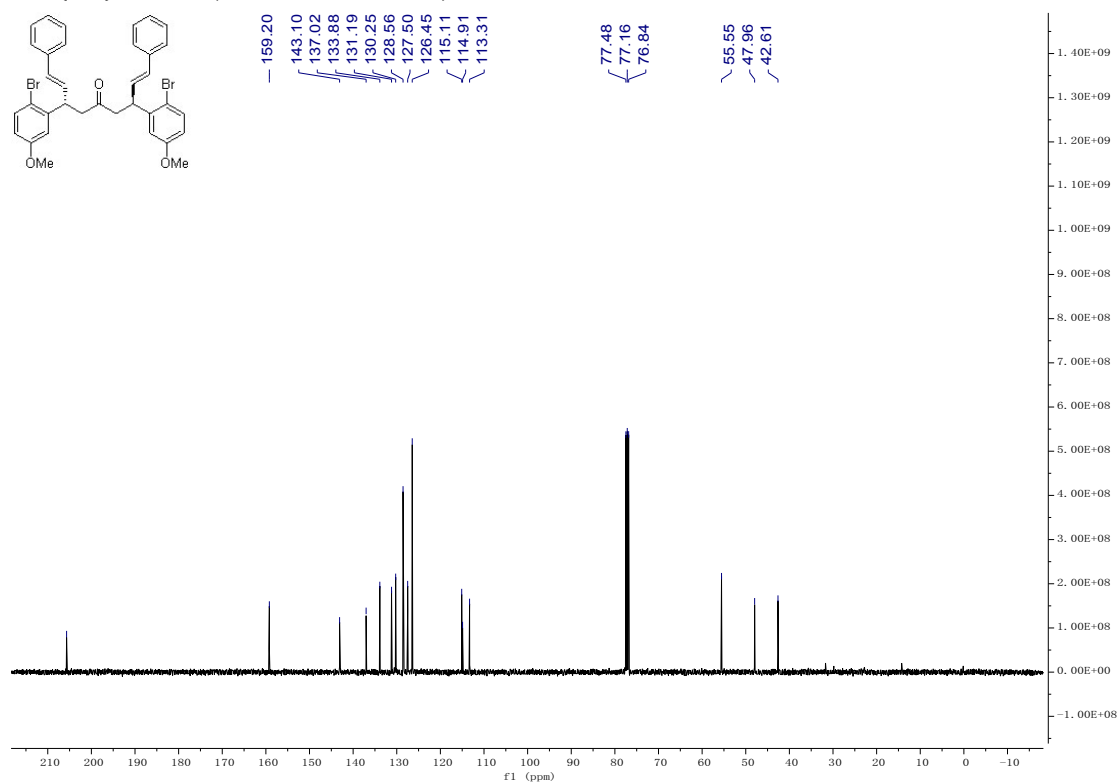

*(1E,3S,7S,8E)-3,7-bis(2,4-dichlorophenyl)-1,9-diphenylnona-1,8-dien-5-one (3ma)*

$^1\text{H}$  NMR (400 MHz,  $\text{CDCl}_3$ )

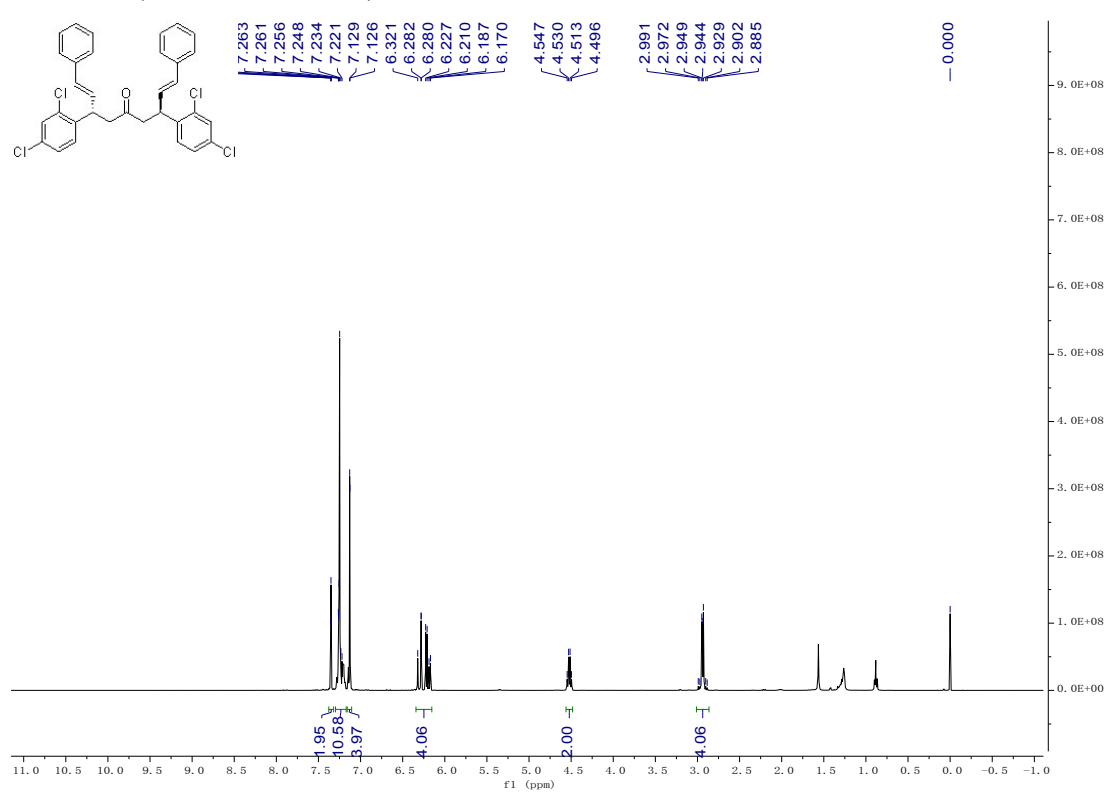



$^{13}\text{C}\{^1\text{H}\}$  NMR (100 MHz,  $\text{CDCl}_3$ ) (n-hexane: 14.1, 22.7, 31.6.)

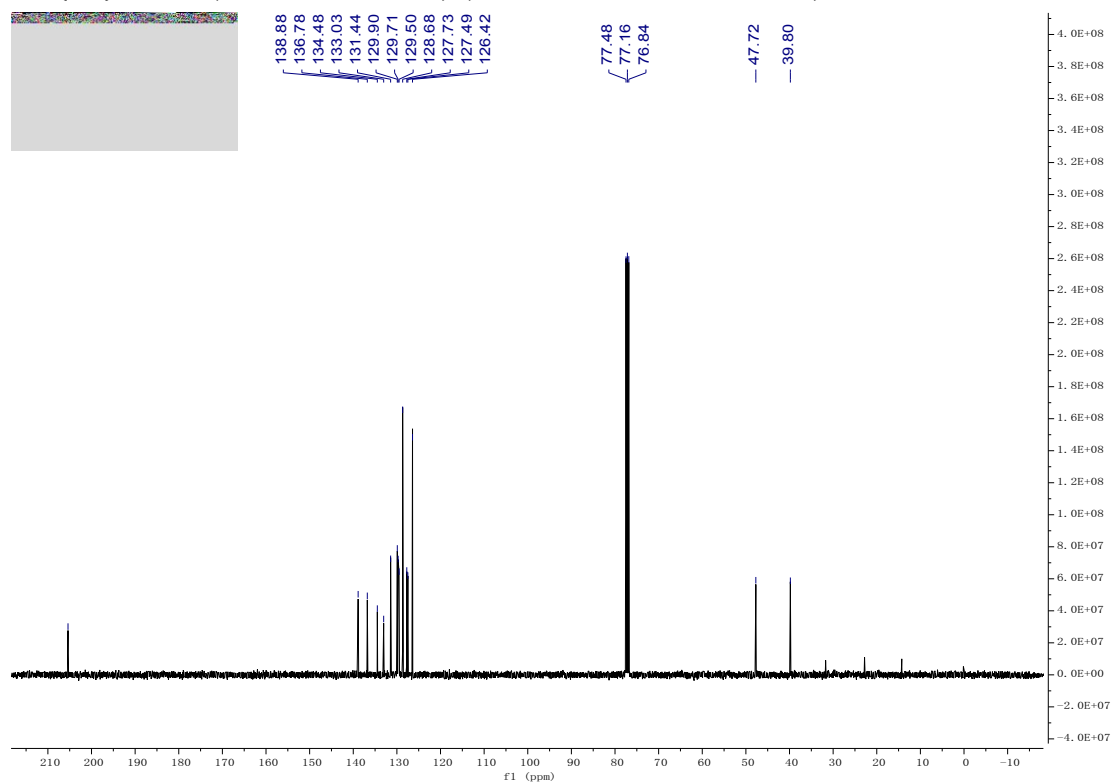

(1*E*,3*S*,7*S*,8*E*)-3,7-di(naphthalen-2-yl)-1,9-diphenylnona-1,8-dien-5-one (**3na**)

$^1\text{H}$  NMR (600 MHz,  $\text{CDCl}_3$ )

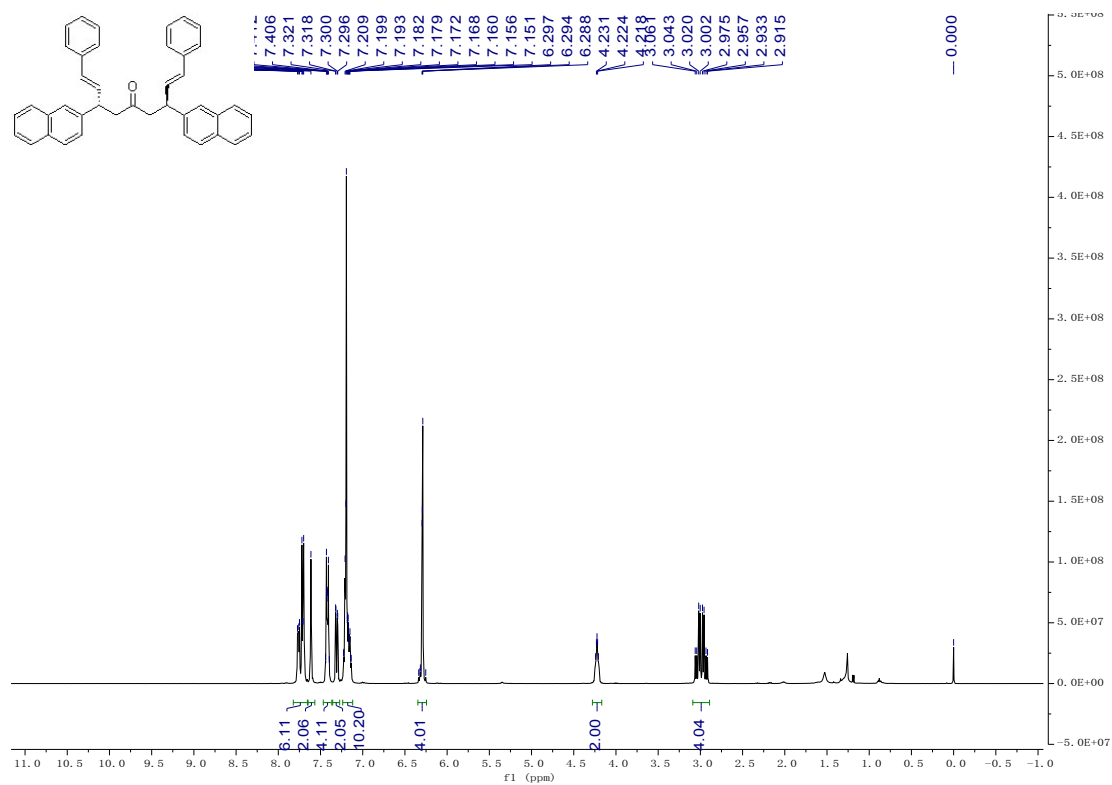

$^{13}\text{C}\{^1\text{H}\}$  NMR (150 MHz,  $\text{CDCl}_3$ )

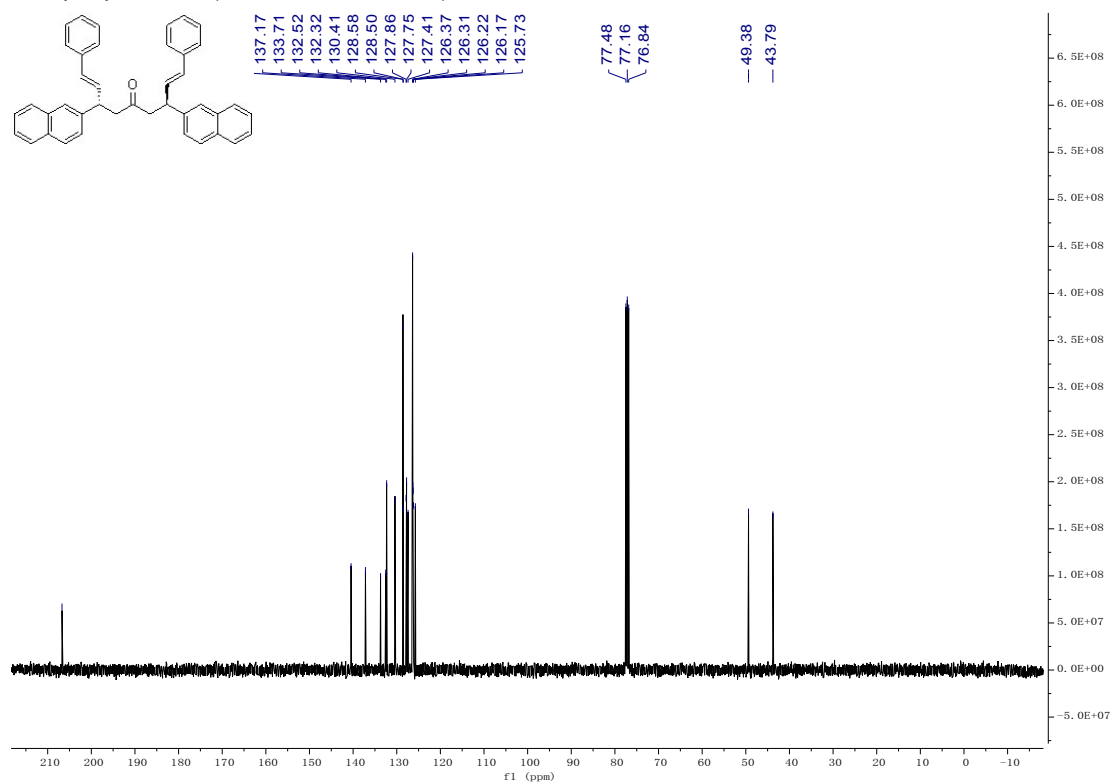

(1E,3S,7S,8E)-3,7-di(naphthalen-1-yl)-1,9-diphenylnona-1,8-dien-5-one (30a)

$^1\text{H}$  NMR (400 MHz,  $\text{CDCl}_3$ )

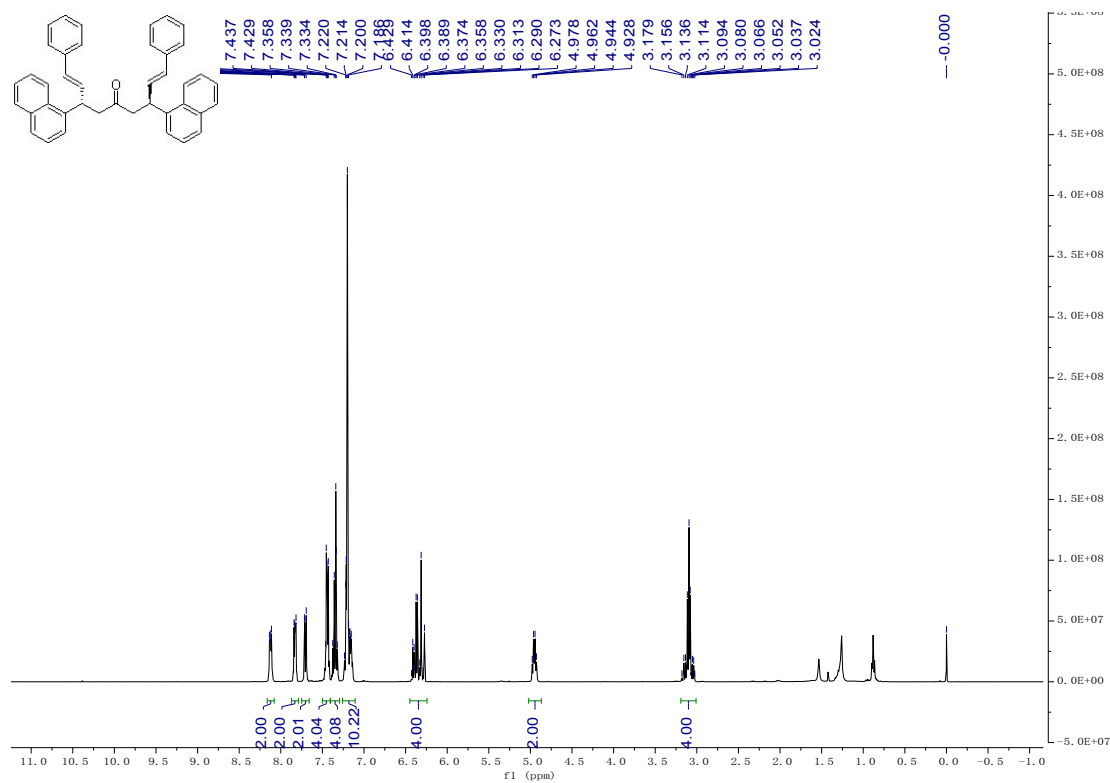

$^{13}\text{C}\{^1\text{H}\}$  NMR (100 MHz,  $\text{CDCl}_3$ ) (n-hexane: 14.1, 22.7, 31.6.)

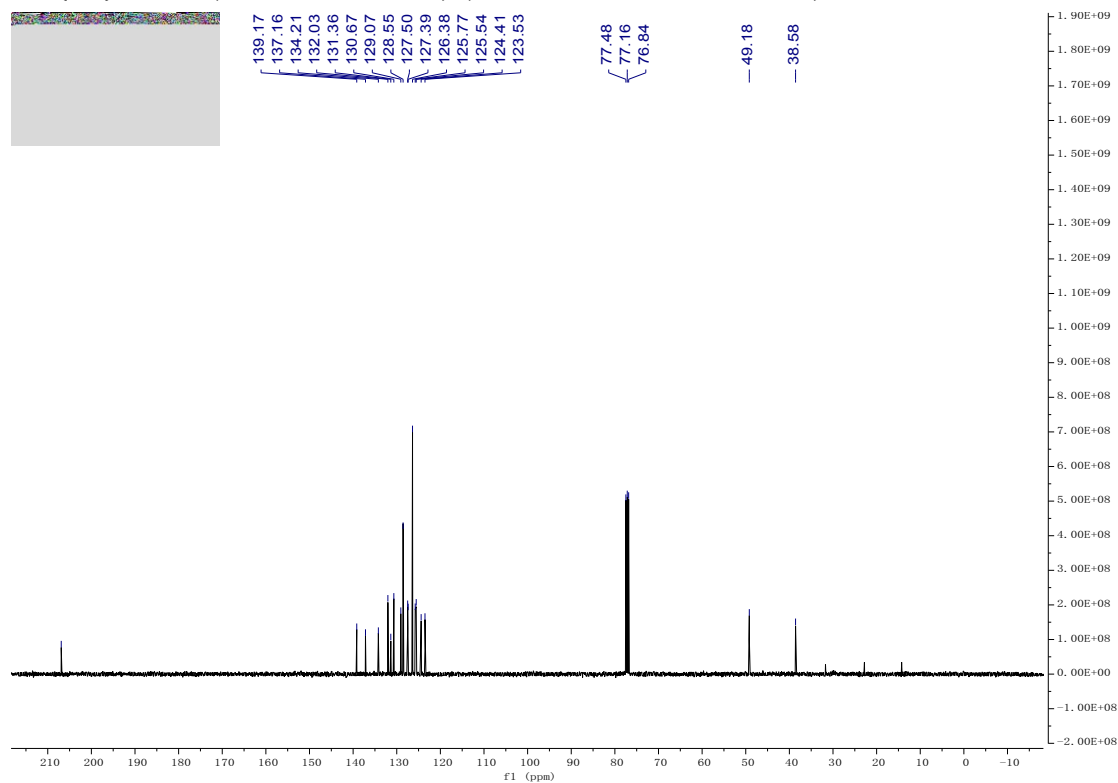

(1*E*,3*S*,7*S*,8*E*)-3,7-di(furan-2-yl)-1,9-diphenylnona-1,8-dien-5-one (**3pa**)

$^1\text{H}$  NMR (600 MHz,  $\text{CDCl}_3$ )

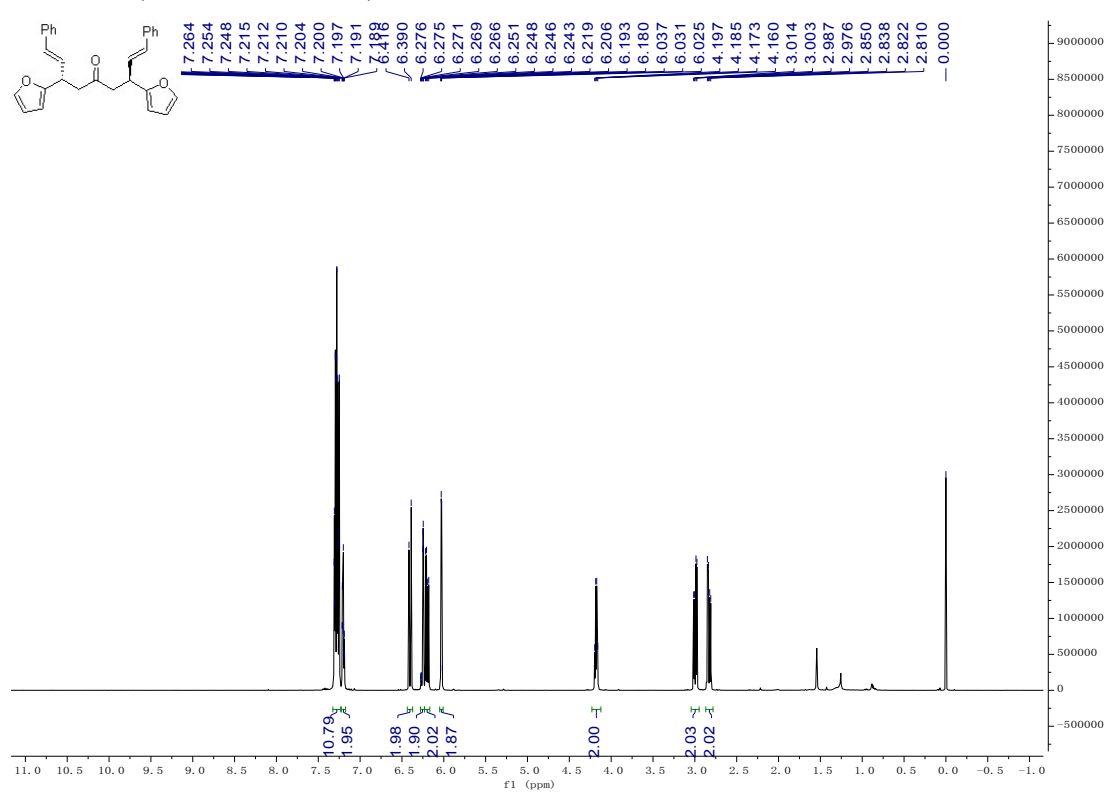

$^{13}\text{C}\{^1\text{H}\}$  NMR (150 MHz,  $\text{CDCl}_3$ )

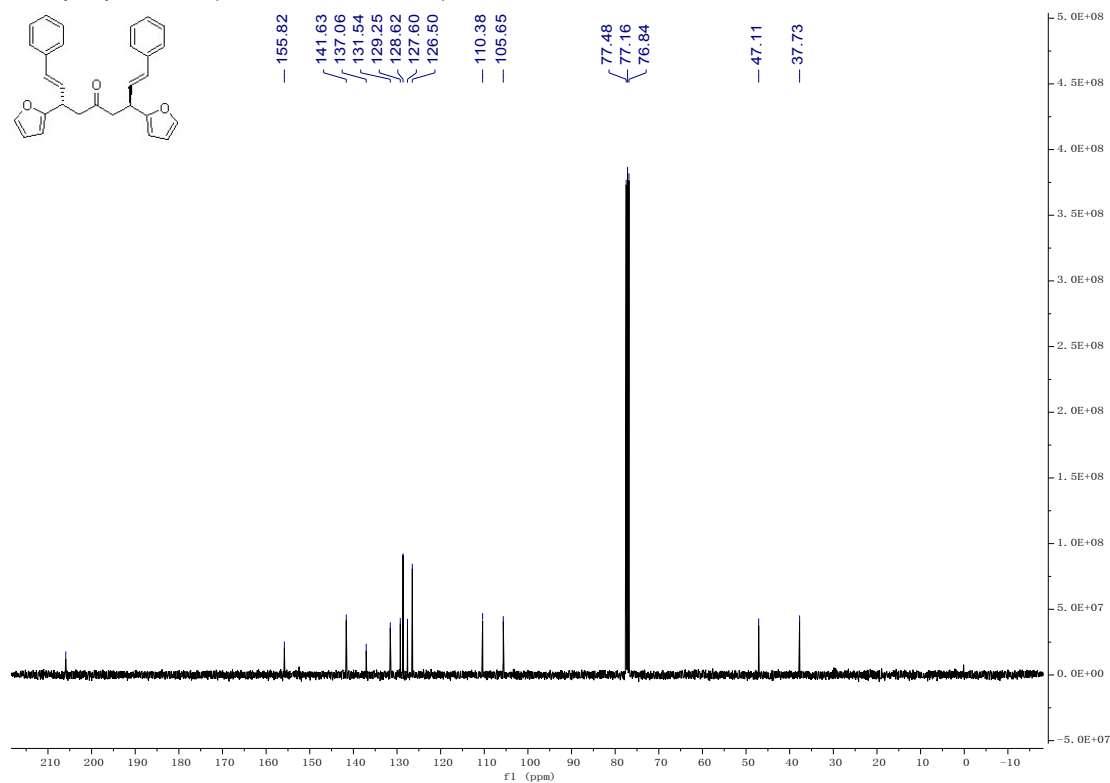

$(1E,3S,7S,8E)$ -1,9-diphenyl-3,7-di(thiophen-2-yl)nona-1,8-dien-5-one (**3qa**)

$^1\text{H}$  NMR (400 MHz,  $\text{CDCl}_3$ )

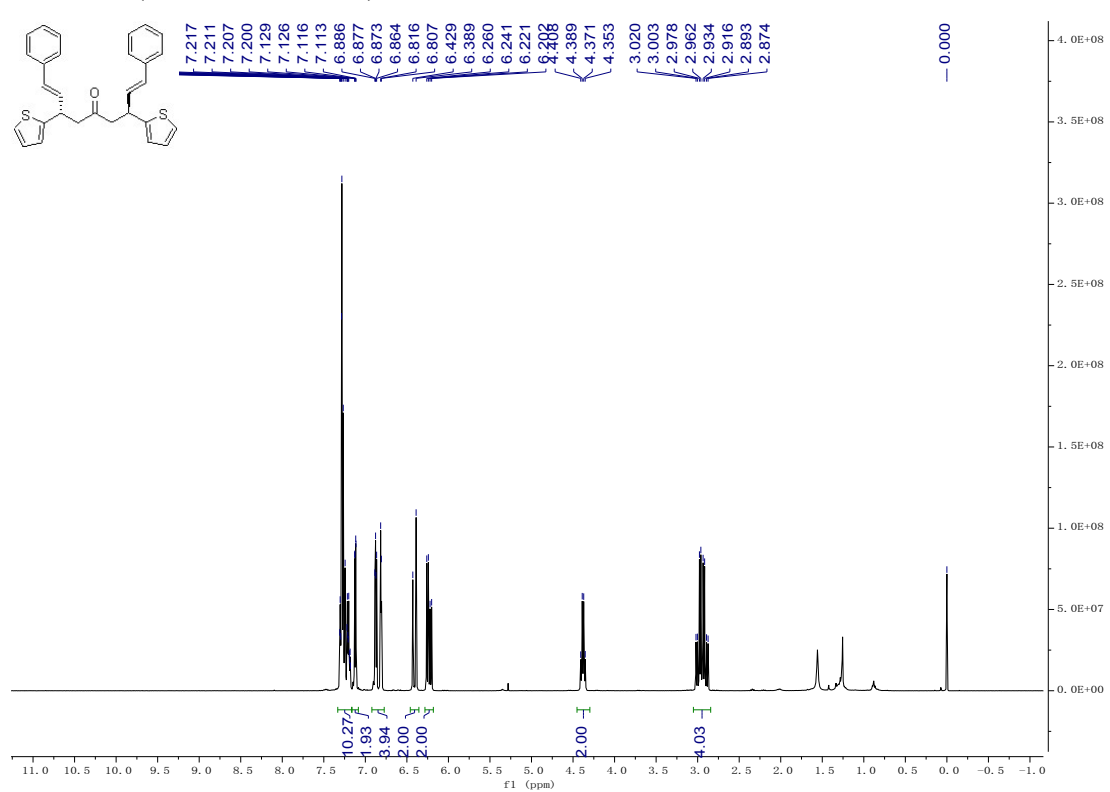

$^{13}\text{C}\{^1\text{H}\}$  NMR (100 MHz,  $\text{CDCl}_3$ )

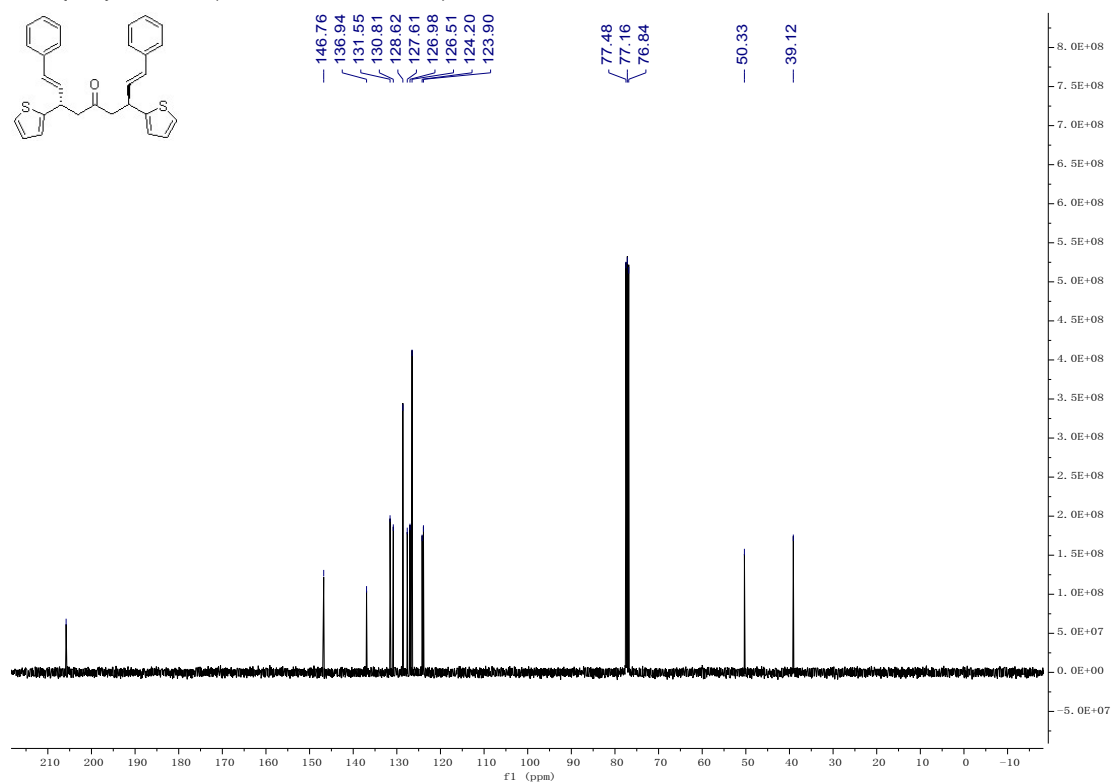

*(1E,3S,7S,8E)*-3-(4-methoxyphenyl)-1,7,9-triphenylnona-1,8-dien-5-one (**3ra**)

$^1\text{H}$  NMR (600 MHz,  $\text{CDCl}_3$ )

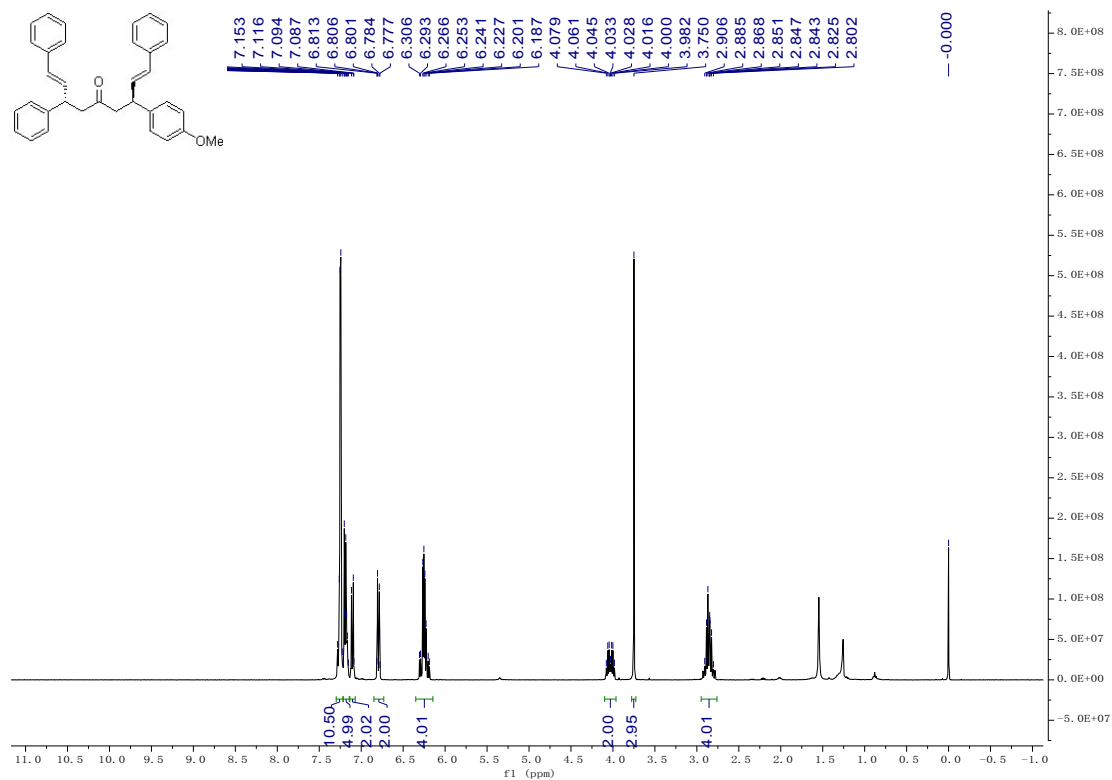

$^{13}\text{C}\{^1\text{H}\}$  NMR (150 MHz,  $\text{CDCl}_3$ )

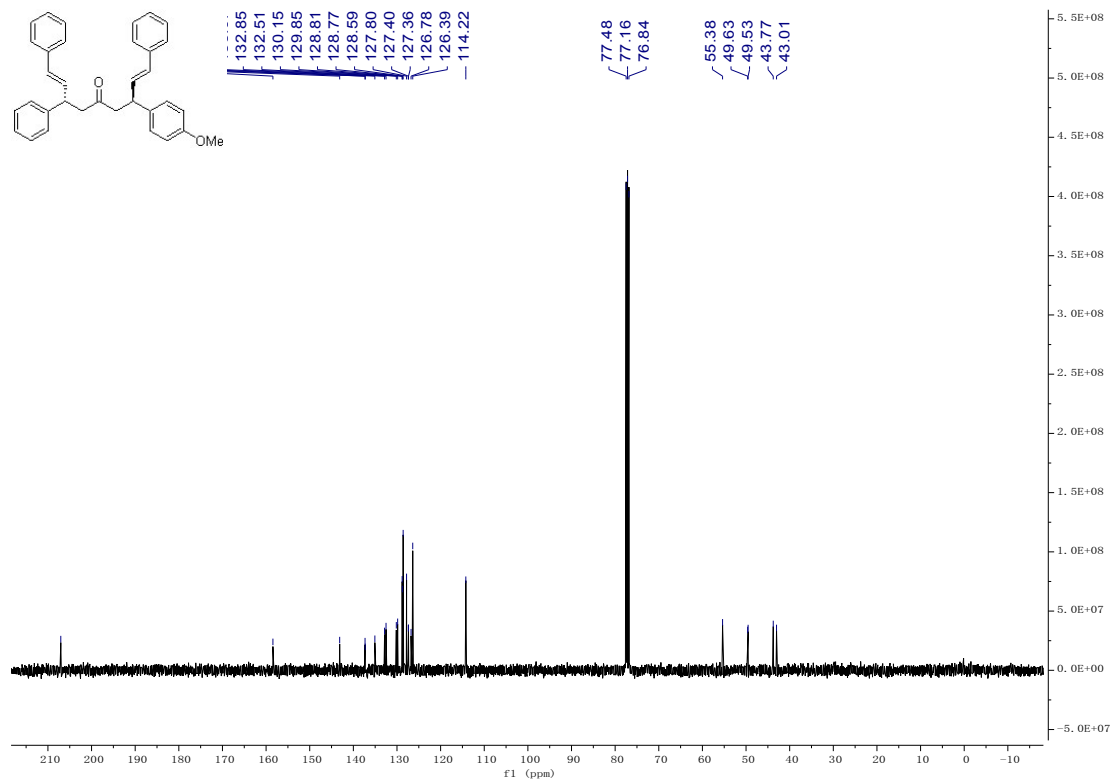

*(1E,3S,7S,8E)-1,3,9-triphenyl-7-(4-(trifluoromethyl)phenyl)nona-1,8-dien-5-one (3sa)*

$^1\text{H}$  NMR (400 MHz,  $\text{CDCl}_3$ )

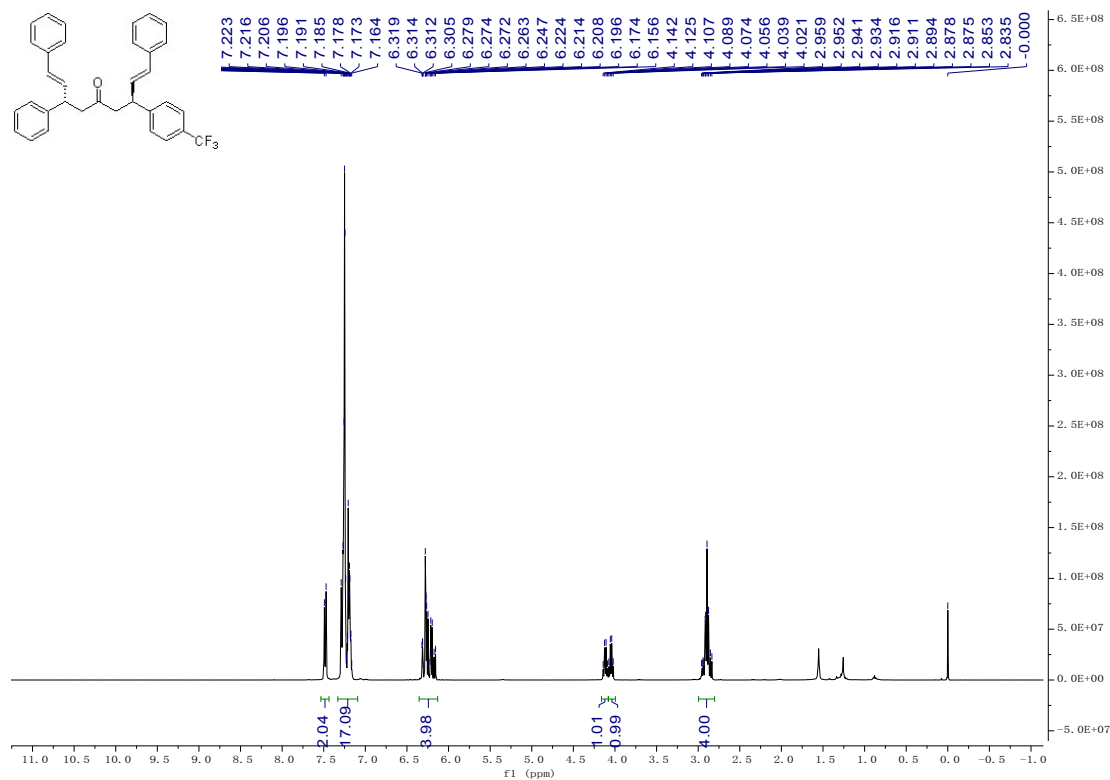

$^{13}\text{C}\{^1\text{H}\}$  NMR (150 MHz,  $\text{CDCl}_3$ )

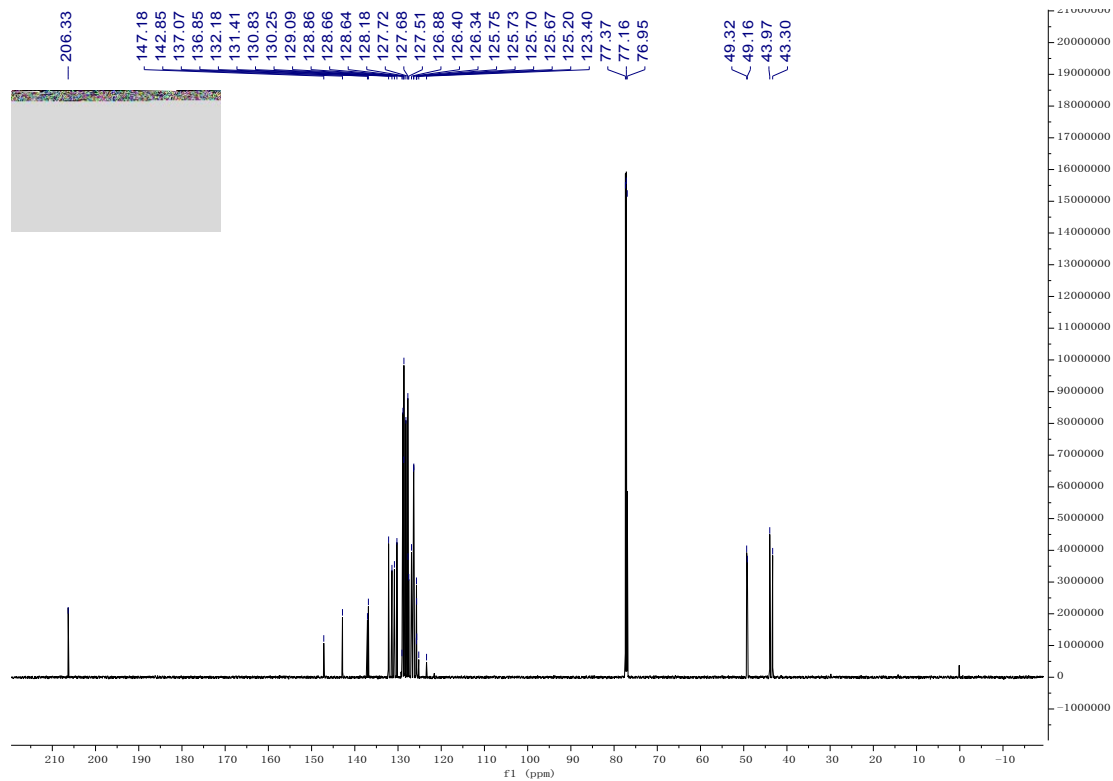

$^{19}\text{F}\{^1\text{H}\}$  NMR (376 MHz,  $\text{CDCl}_3$ )

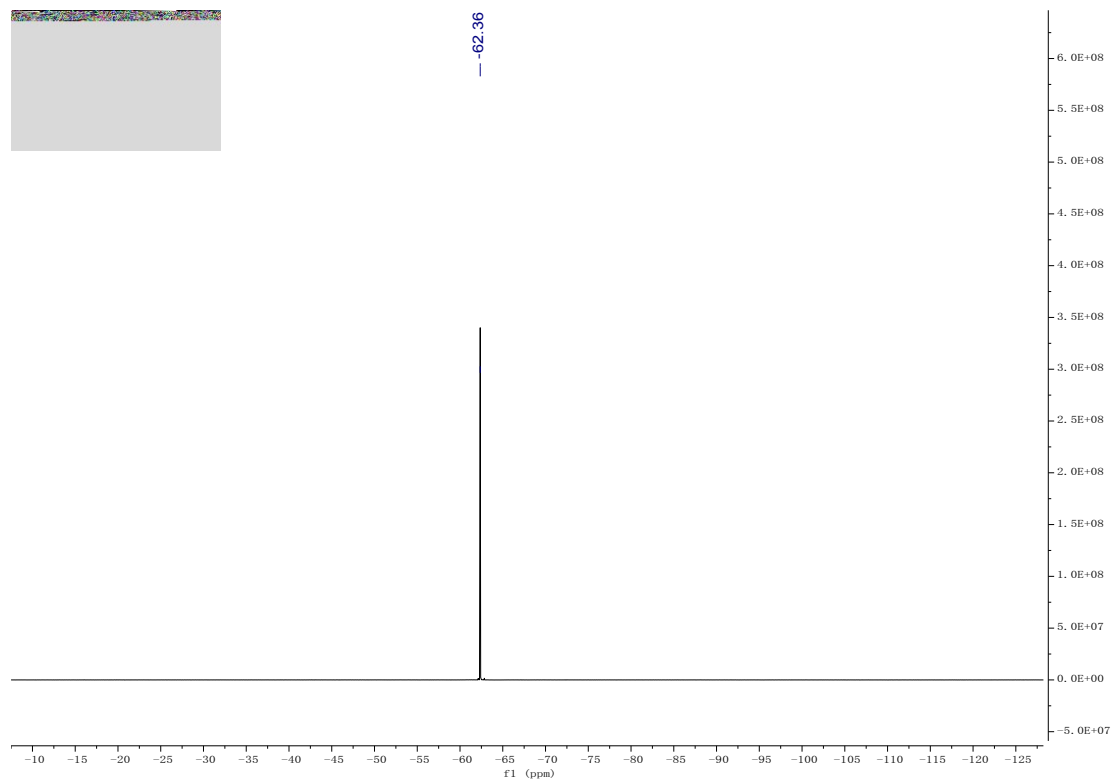

(1E,3S,7S,8E)-3-phenethyl-1,7,9-triphenylnona-1,8-dien-5-one (3ta)

<sup>1</sup>H NMR (400 MHz, CDCl<sub>3</sub>)

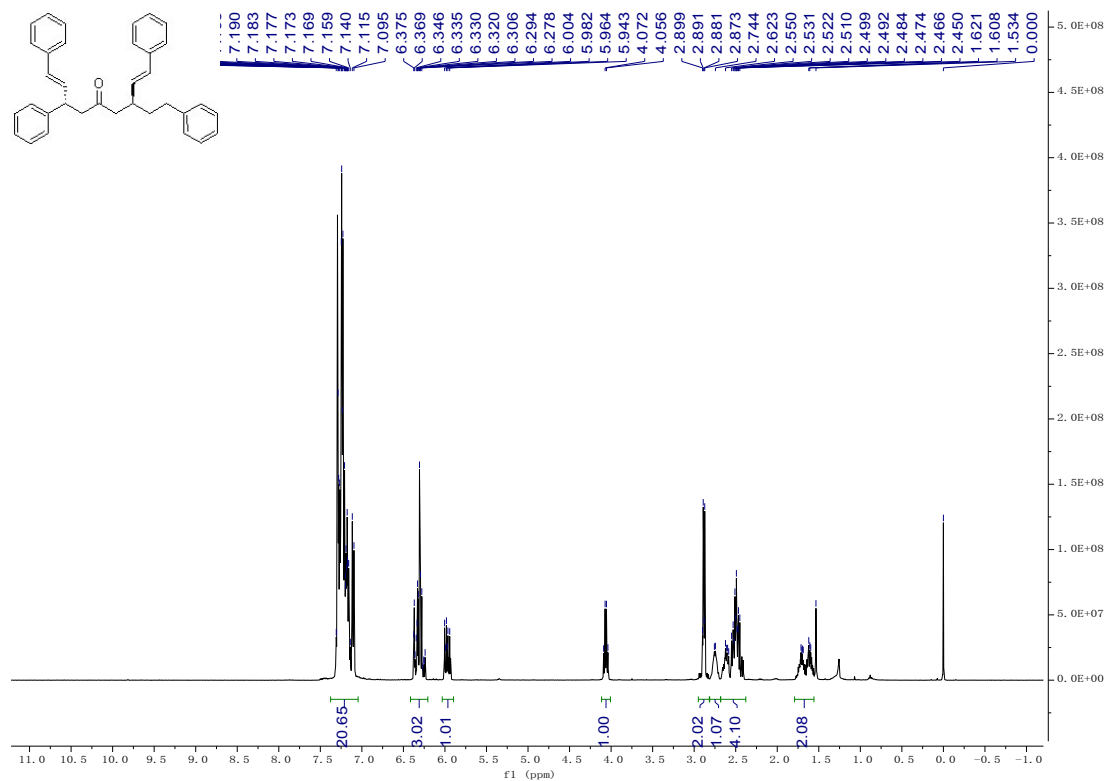

<sup>13</sup>C {<sup>1</sup>H} NMR (150 MHz, CDCl<sub>3</sub>)

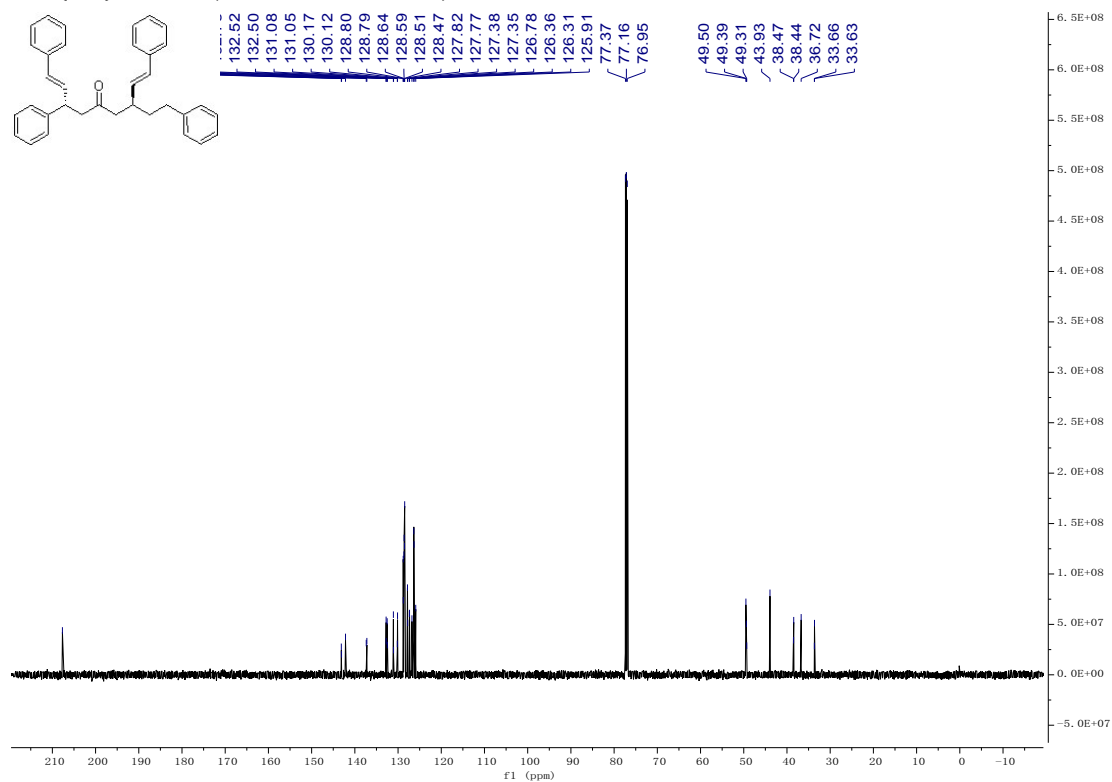



*(3S,7S,E)*-1,3-diphenyl-7-((*E*)-styryl)dec-1-en-5-one (**3ua**)

<sup>1</sup>H NMR (400 MHz, CDCl<sub>3</sub>)

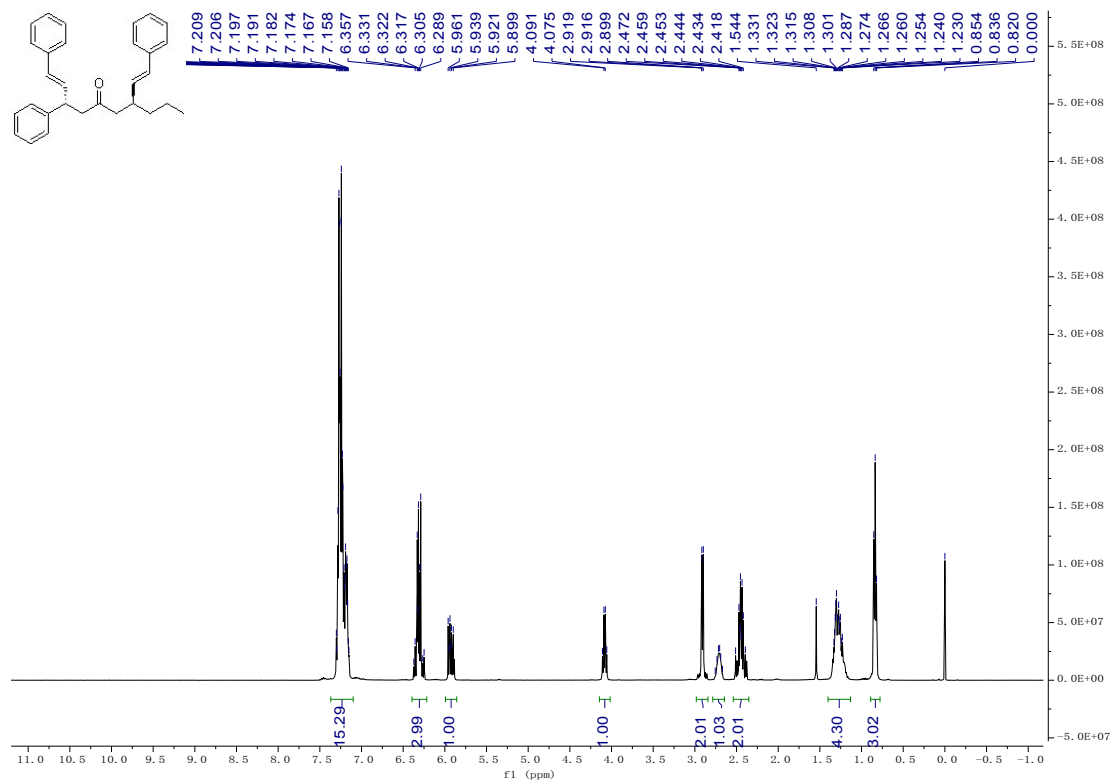

<sup>13</sup>C {<sup>1</sup>H} NMR (150 MHz, CDCl<sub>3</sub>)

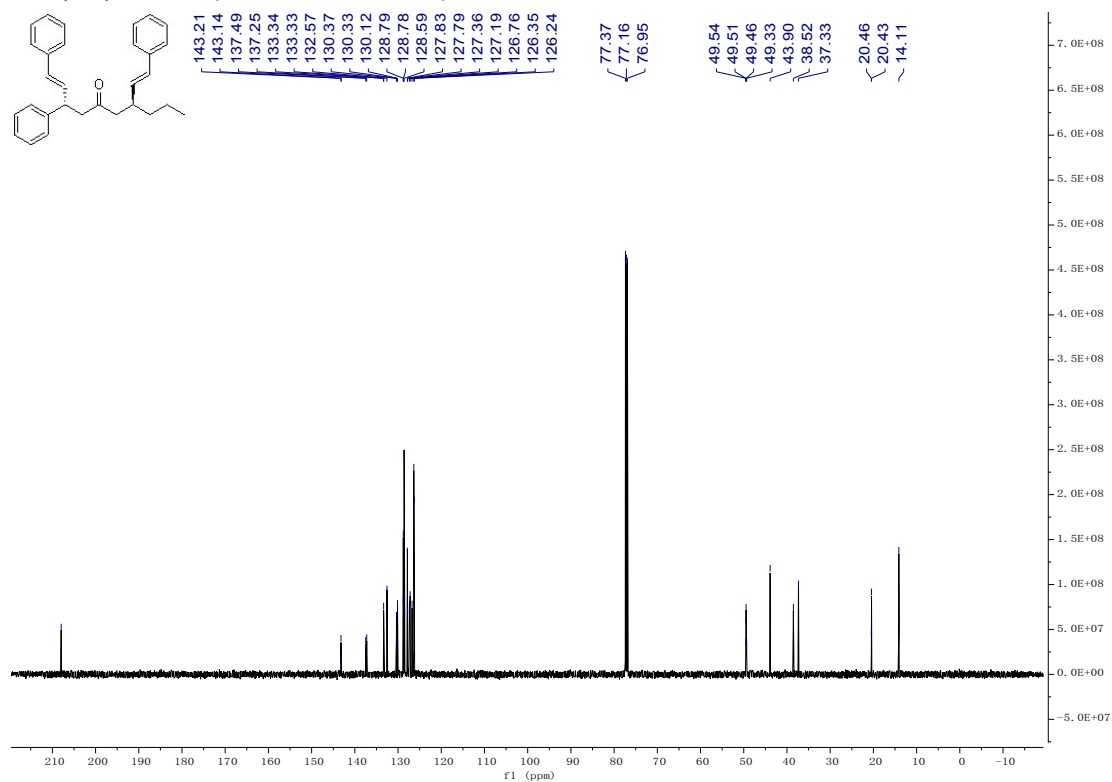

*(1E,3S,7S,8E)*-3,7-diphenyl-1,9-di-*p*-tolylnona-1,8-dien-5-one (**3ab**)

$^1\text{H}$  NMR (600 MHz,  $\text{CDCl}_3$ )

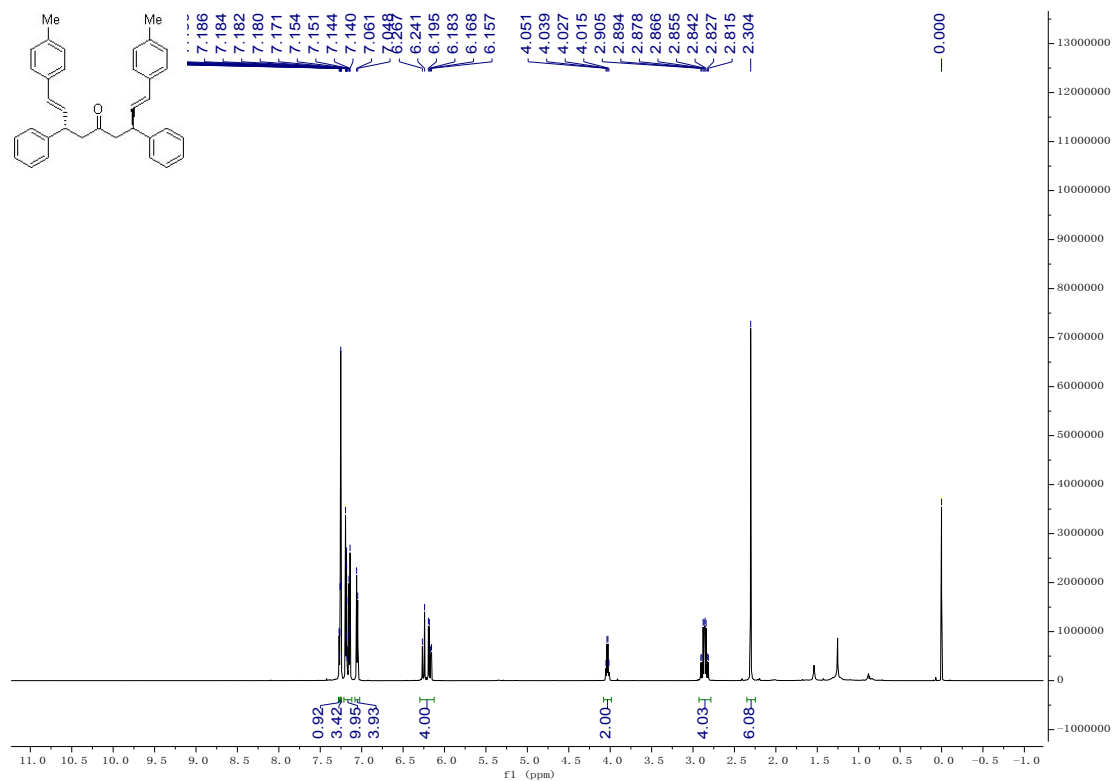

$^{13}\text{C}\{^1\text{H}\}$  NMR (150 MHz,  $\text{CDCl}_3$ )

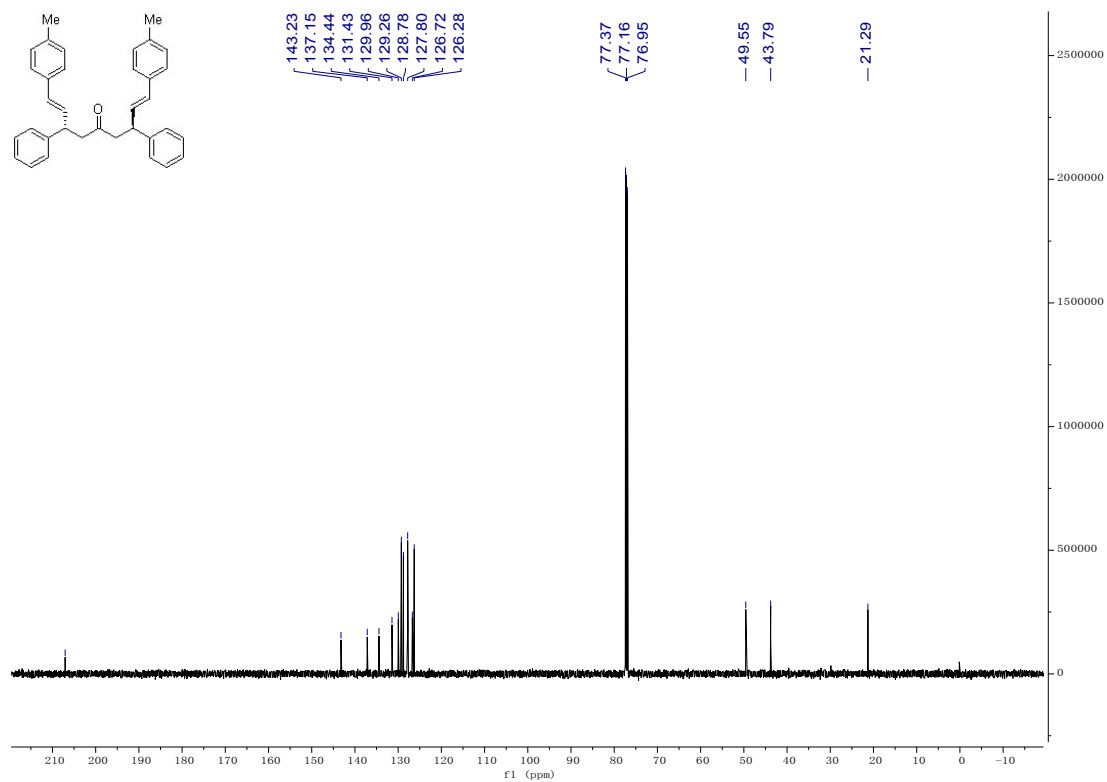

*(S,1E,6E)*-7-(4-methoxyphenyl)-1,5-diphenylhepta-1,6-dien-3-one (**4ac**)

$^1\text{H}$  NMR (600 MHz,  $\text{CDCl}_3$ )

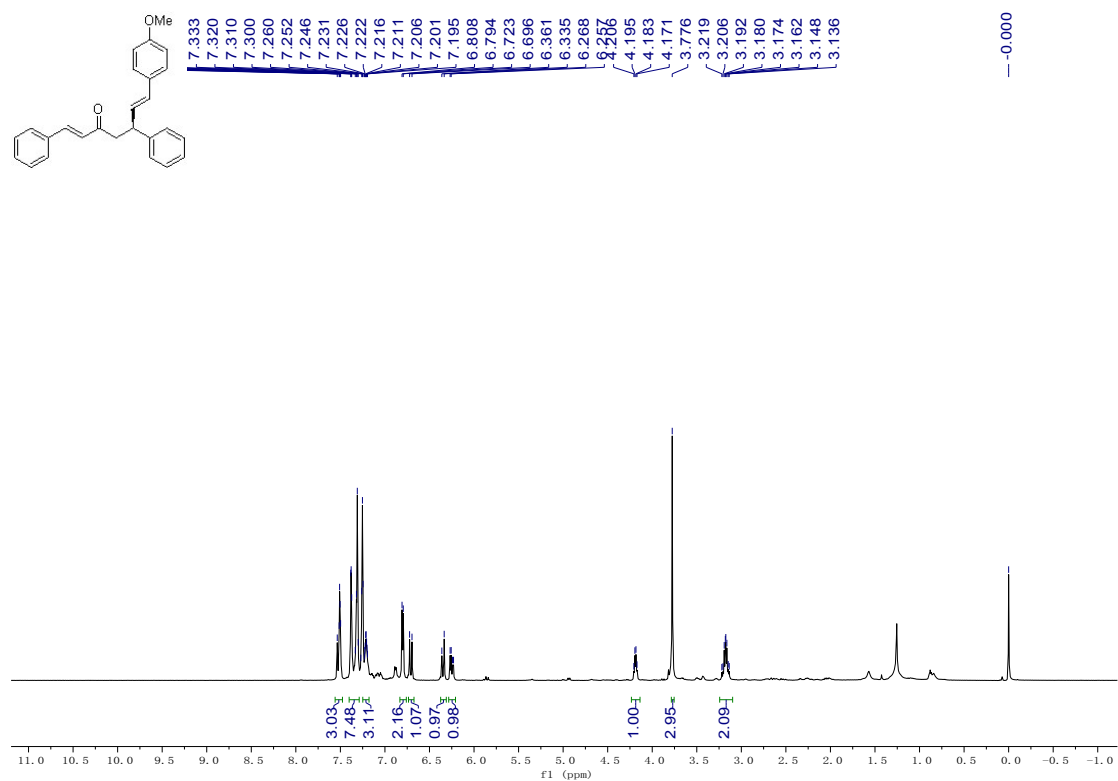

$^{13}\text{C}\{^1\text{H}\}$  NMR (150 MHz,  $\text{CDCl}_3$ )

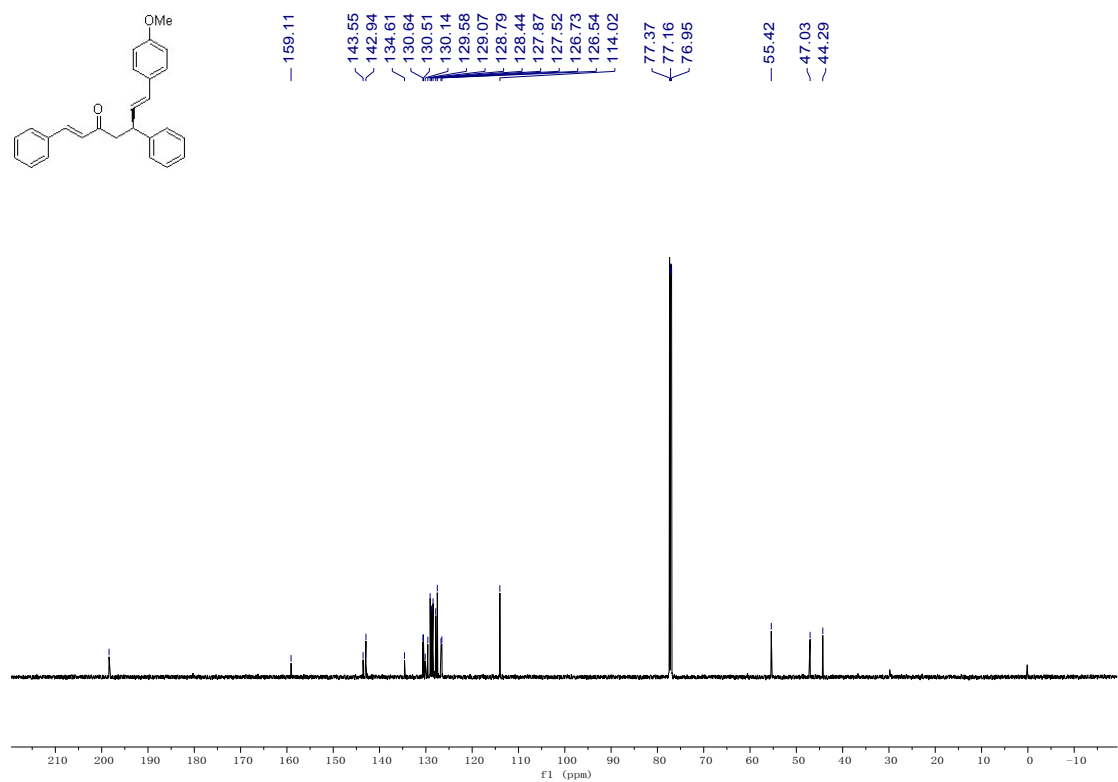

*(1E,3S,7S,8E)*-1,9-bis(4-chlorophenyl)-3,7-diphenylnona-1,8-dien-5-one (**3ad**)

<sup>1</sup>H NMR (600 MHz, CDCl<sub>3</sub>)

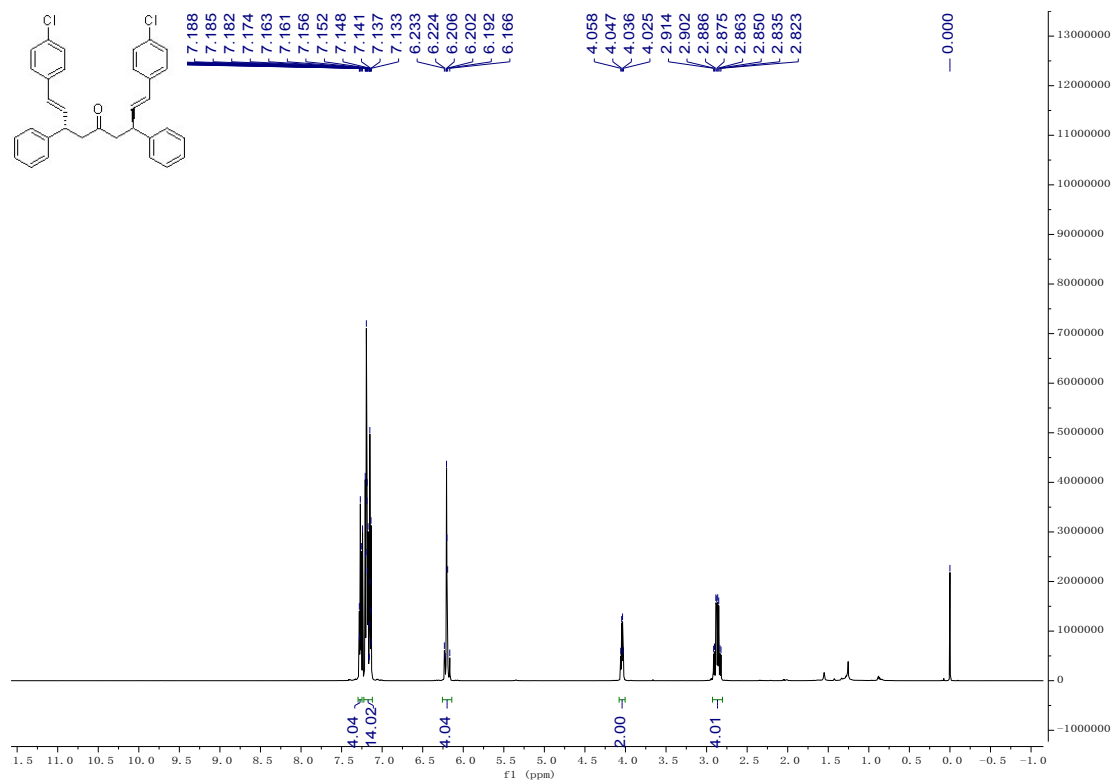

<sup>13</sup>C{<sup>1</sup>H} NMR (150 MHz, CDCl<sub>3</sub>)

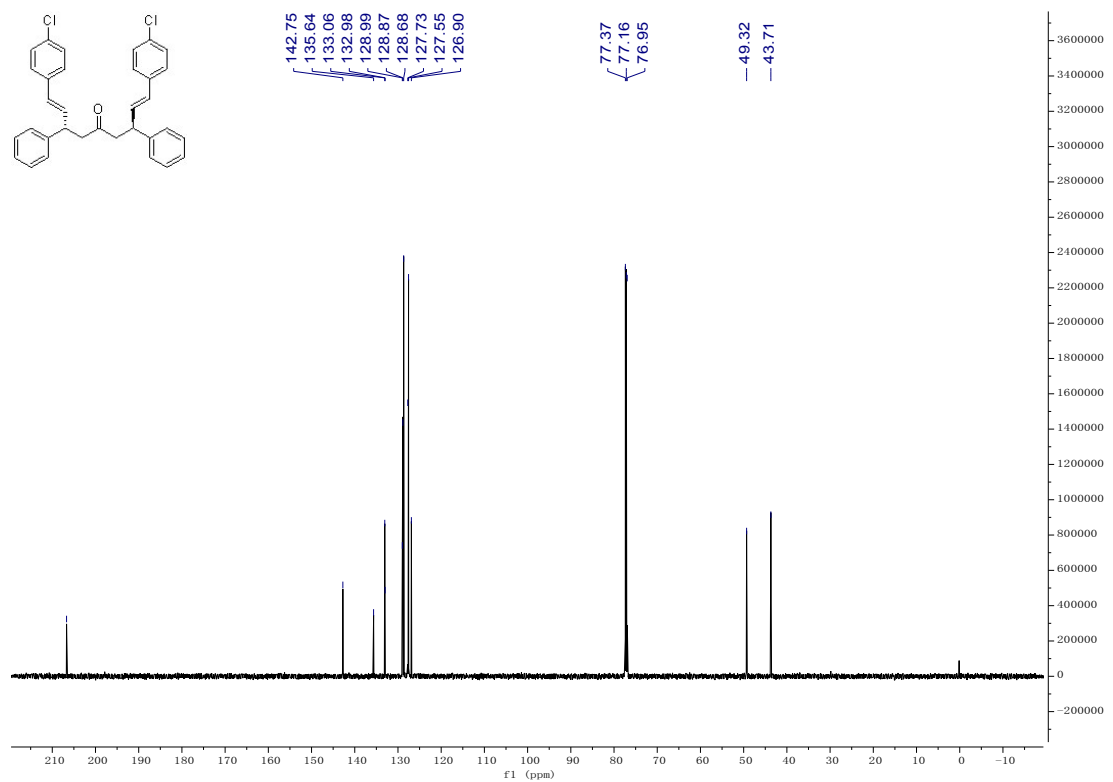

(1E,3S,7S,8E)-3,7-bis(2-bromo-5-methoxyphenyl)-1,9-di-p-tolylnona-1,8-dien-5-one

(31b)

<sup>1</sup>H NMR (600 MHz, CDCl<sub>3</sub>)

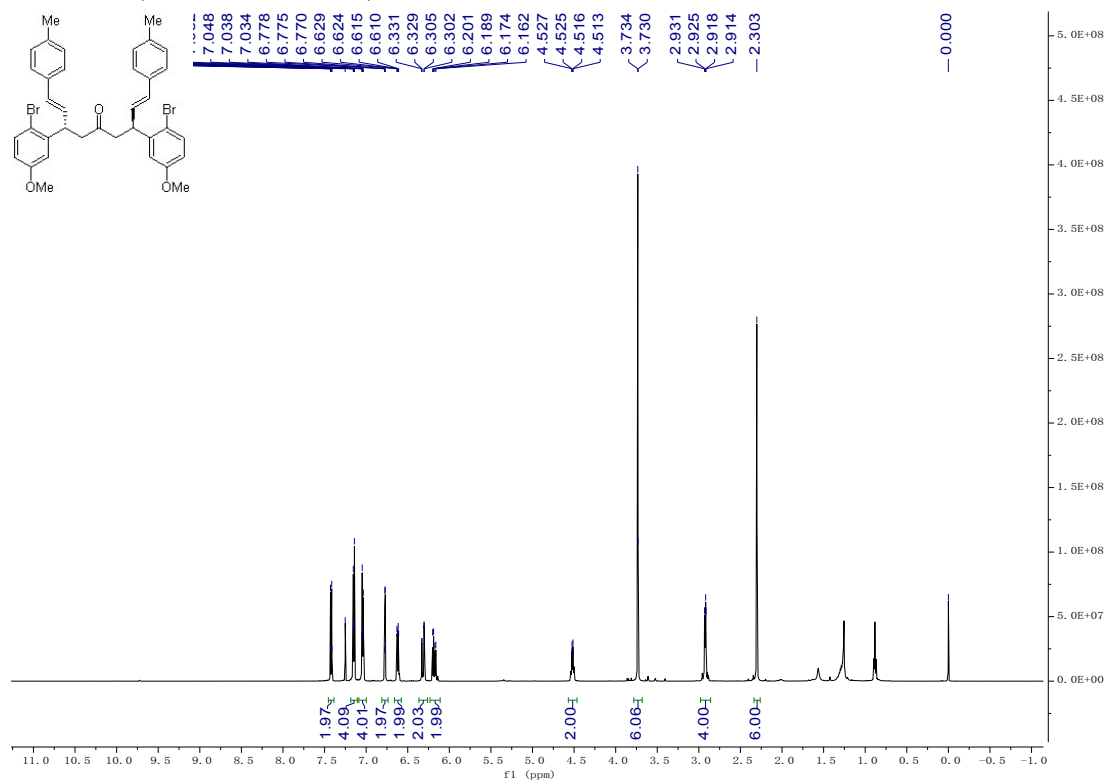

<sup>13</sup>C{<sup>1</sup>H} NMR (150 MHz, CDCl<sub>3</sub>) (n-hexane: 14.1, 22.7, 31.6)

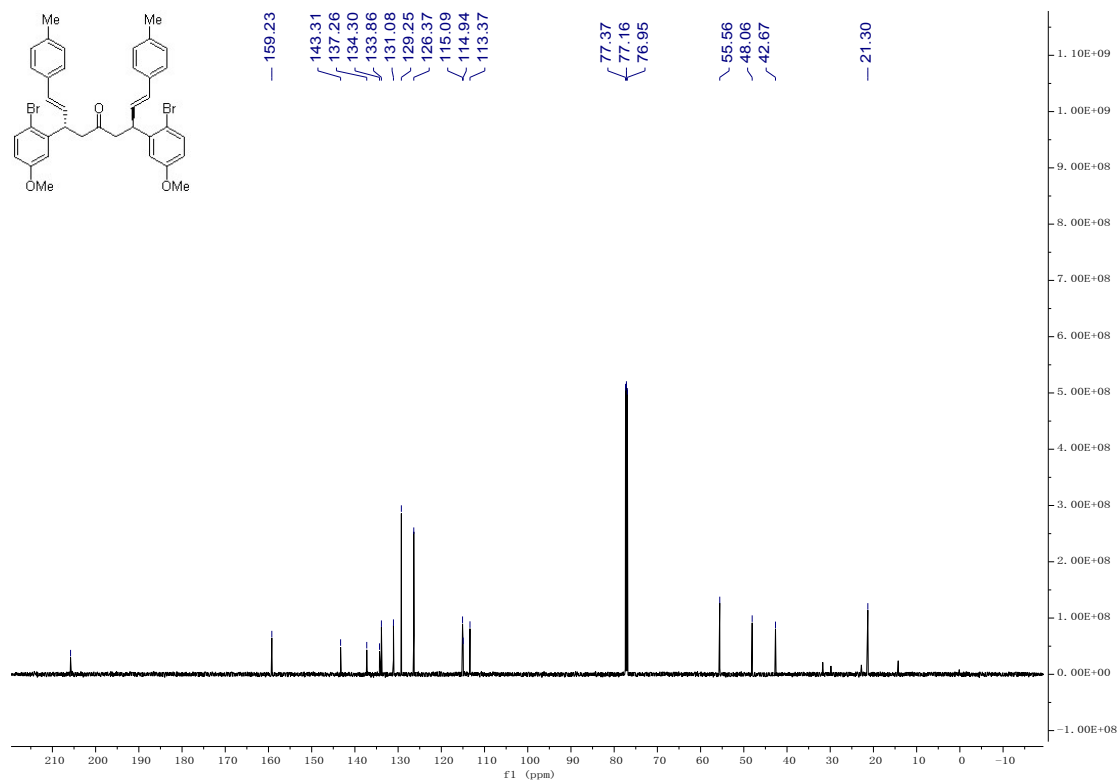

(2-Hydroxyphenyl)((1R,2R)-5-methyl-1,2,3,6-tetrahydro-[1,1'-biphenyl]-2-yl)methanone (**3le**)

<sup>1</sup>H NMR (400 MHz, CDCl<sub>3</sub>)

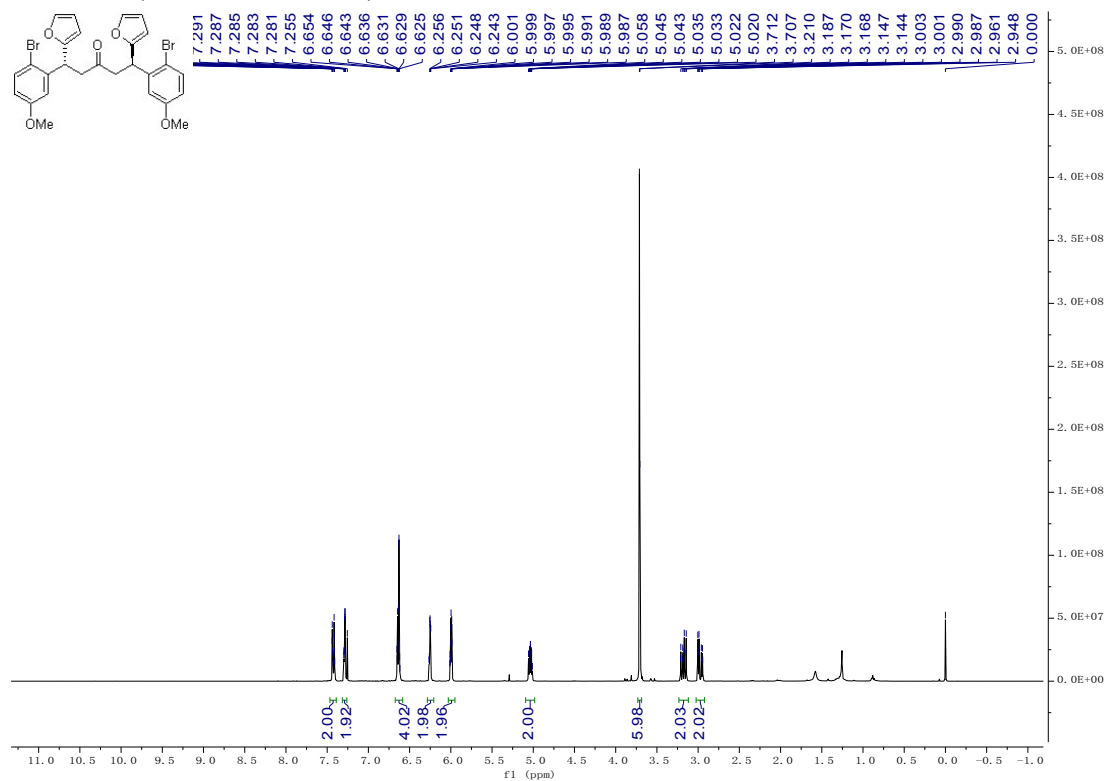

<sup>13</sup>C{<sup>1</sup>H} NMR (100 MHz, CDCl<sub>3</sub>)

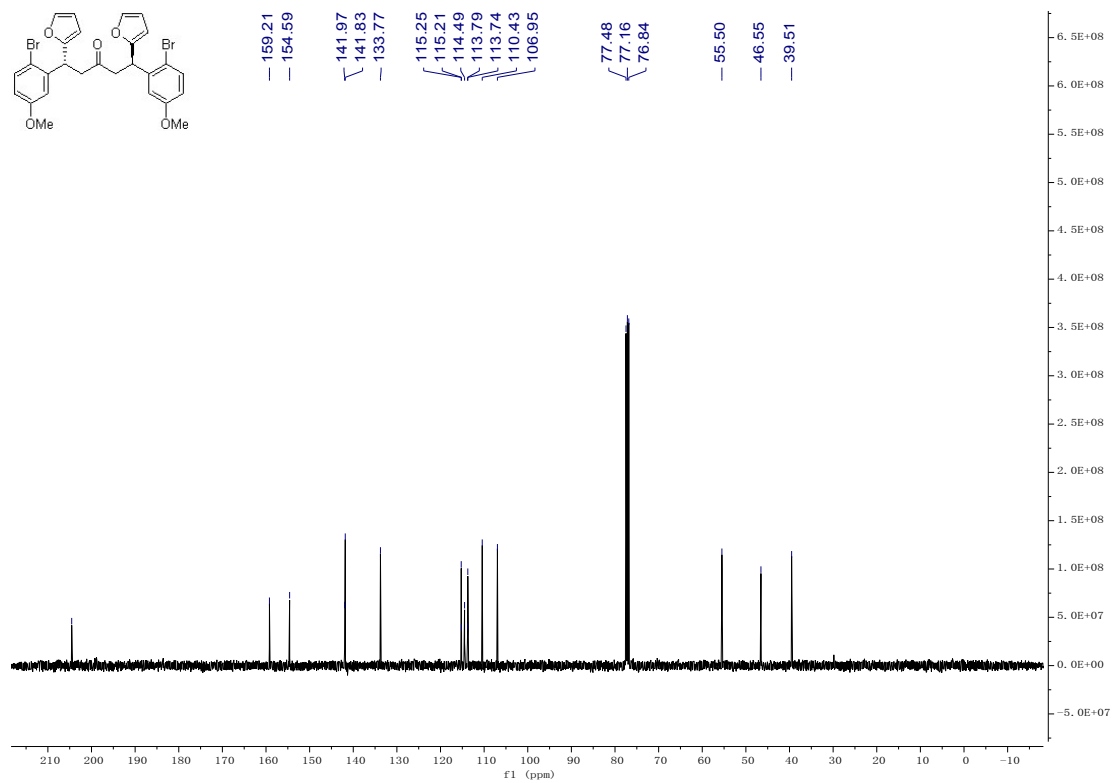

(1*R*,5*R*)-1,5-di(benzofuran-2-yl)-1,5-bis(2-bromo-5-methoxyphenyl)pentan-3-one (**31f**)

<sup>1</sup>H NMR (400 MHz, CDCl<sub>3</sub>)

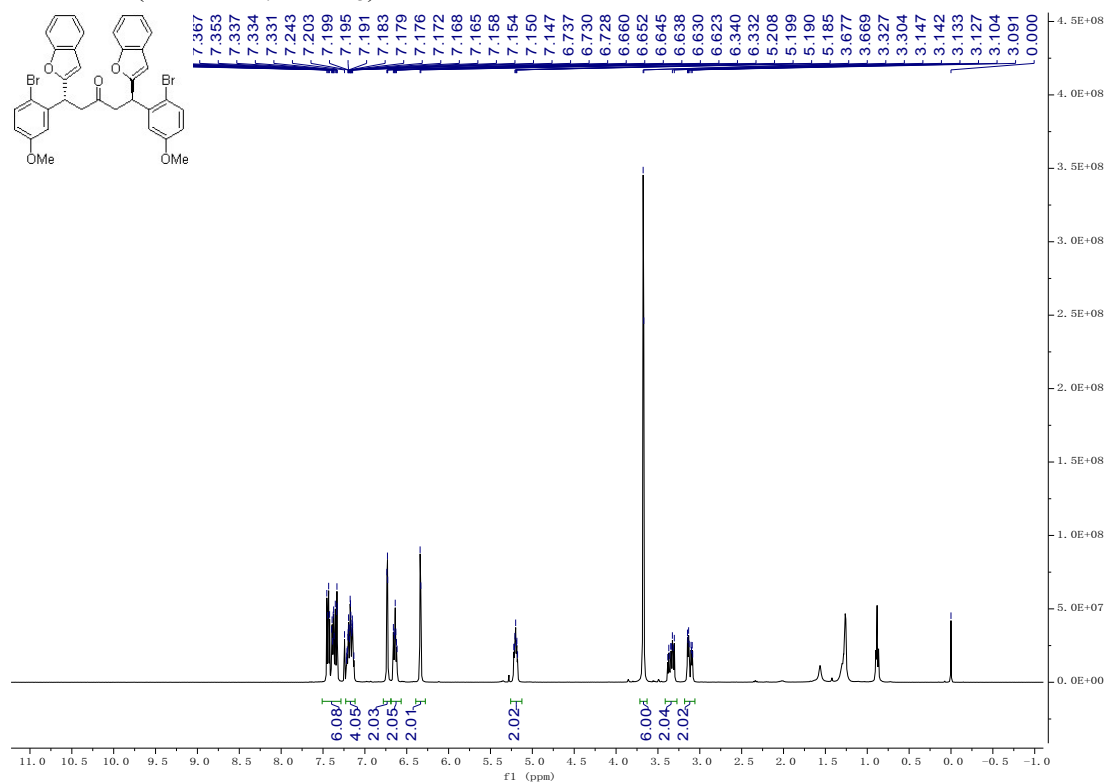

<sup>13</sup>C{<sup>1</sup>H} NMR (100 MHz, CDCl<sub>3</sub>) (n-hexane: 14.1, 22.7, 31.6.)

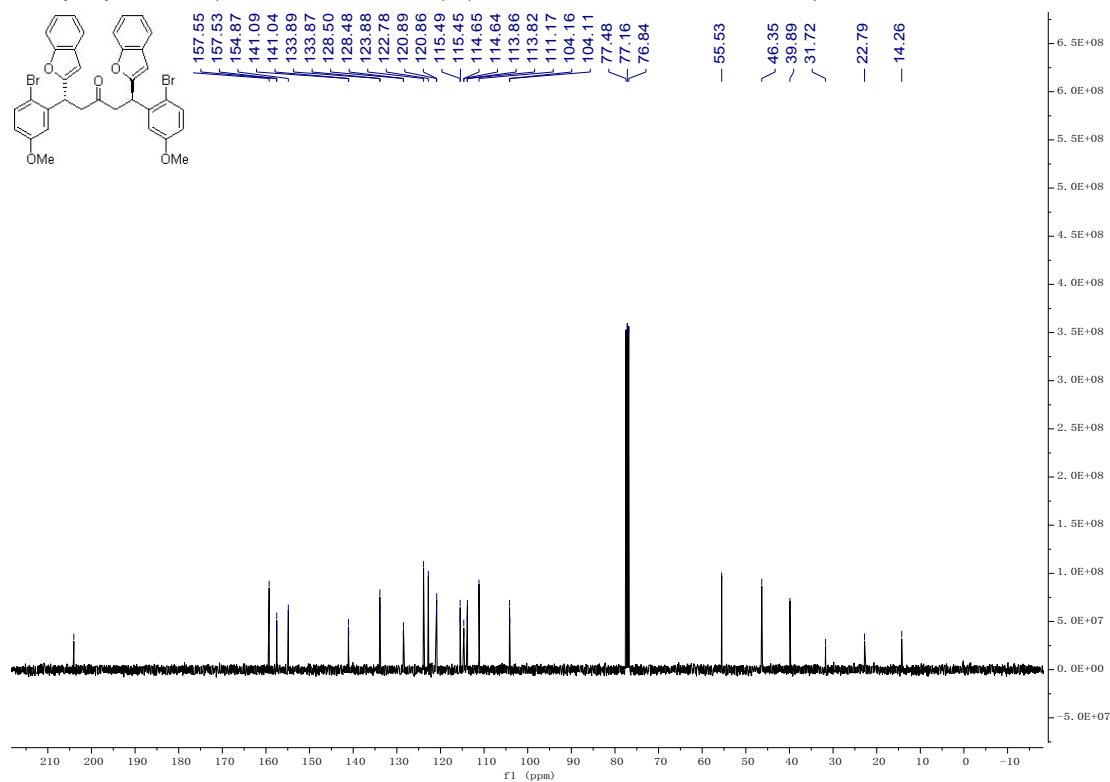

*(R,E)*-1,5-bis(2-bromo-5-methoxyphenyl)-5-(thiophen-2-yl)pent-1-en-3-one (**4lg**)

<sup>1</sup>H NMR (400 MHz, CDCl<sub>3</sub>)

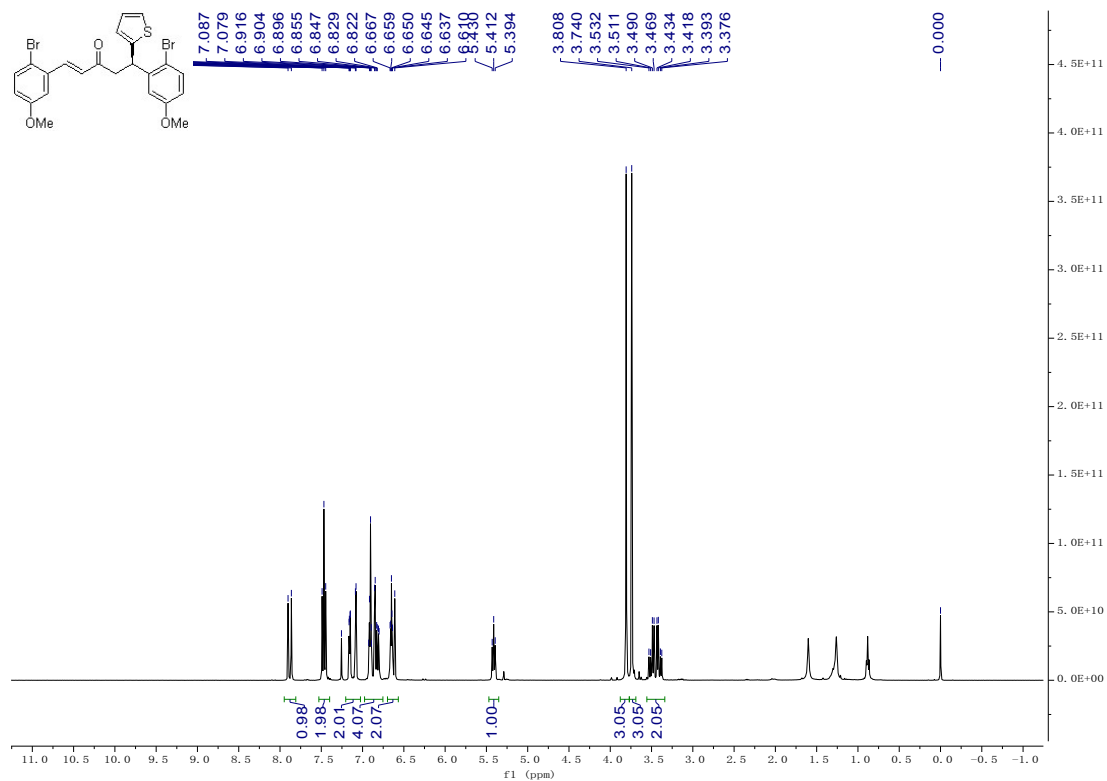

<sup>13</sup>C {<sup>1</sup>H} NMR (100 MHz, CDCl<sub>3</sub>)

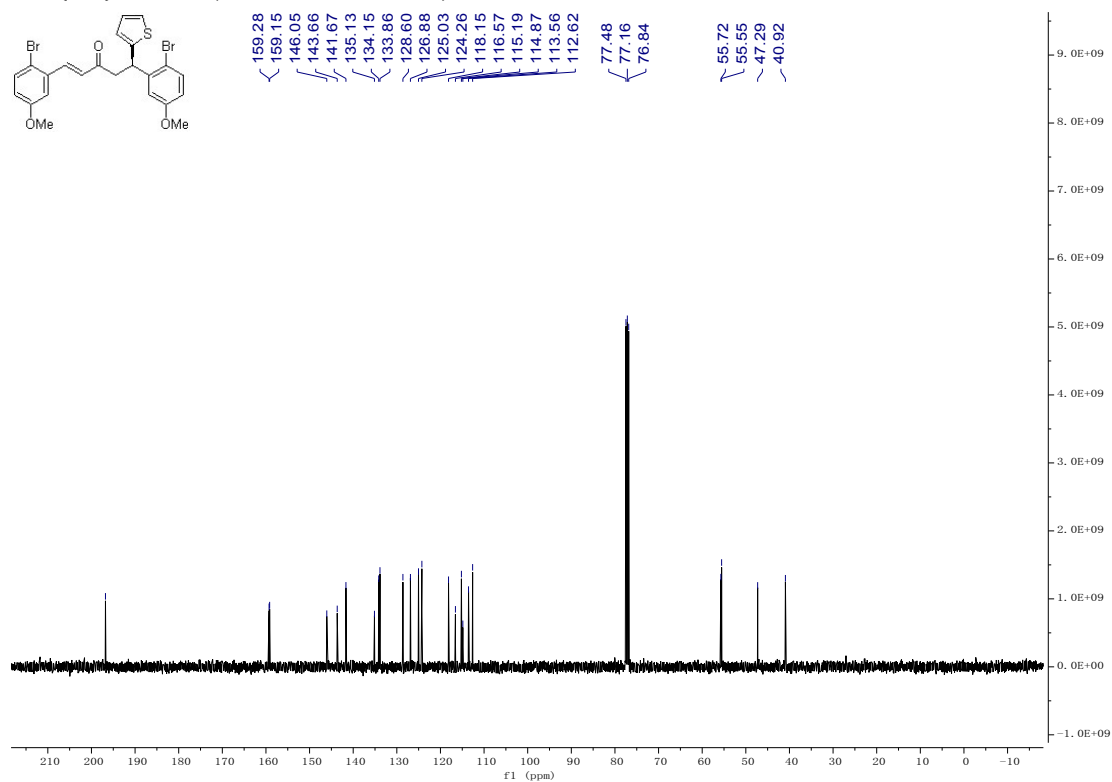



*(R,E)*-5-(benzo[*b*]thiophen-2-yl)-1,5-bis(2-bromo-5-methoxyphenyl)pent-1-en-3-one  
**(4h)**

<sup>1</sup>H NMR (600 MHz, CDCl<sub>3</sub>)

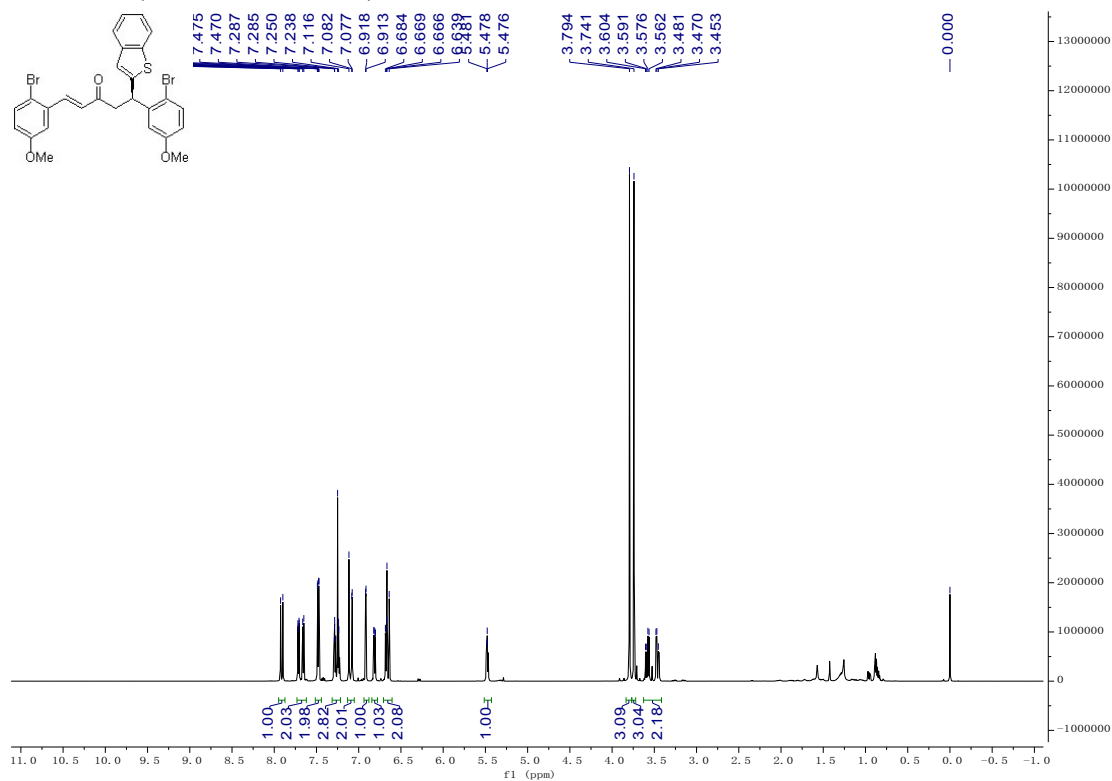

<sup>13</sup>C {<sup>1</sup>H} NMR (150 MHz, CDCl<sub>3</sub>)

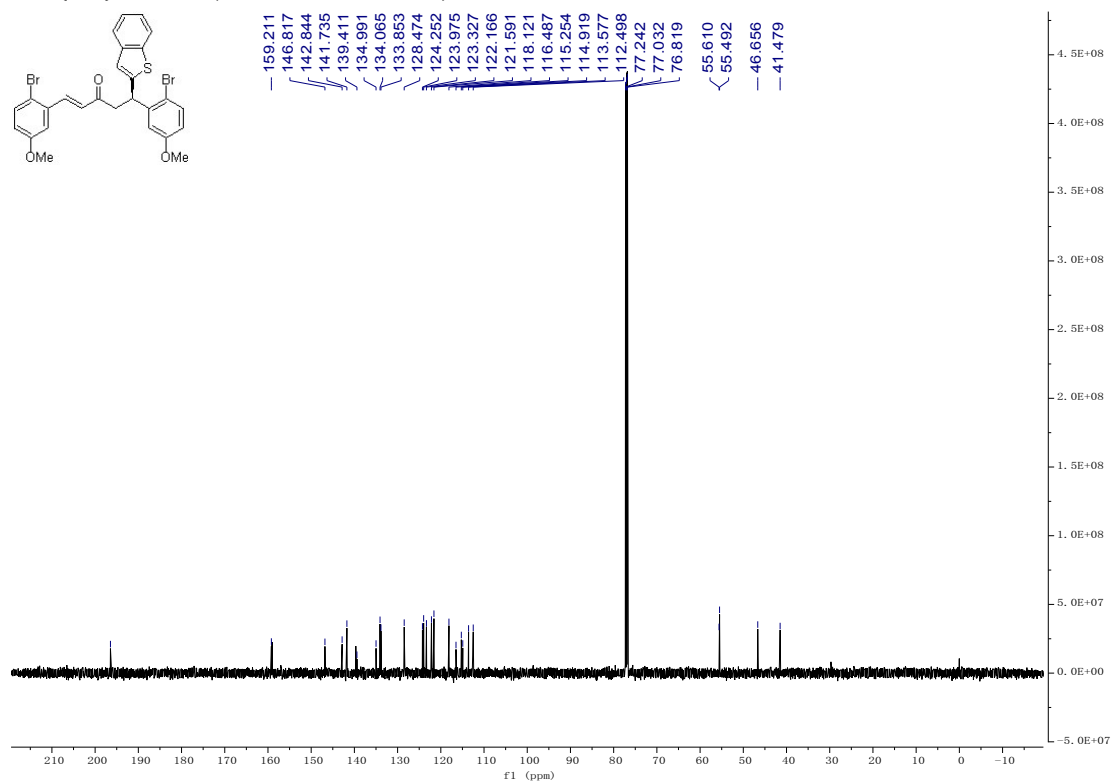

*(S,1E,6E)*-1,5-diphenyltrideca-1,6-dien-3-one (**4ai**)

$^1\text{H}$  NMR (400 MHz,  $\text{CDCl}_3$ )

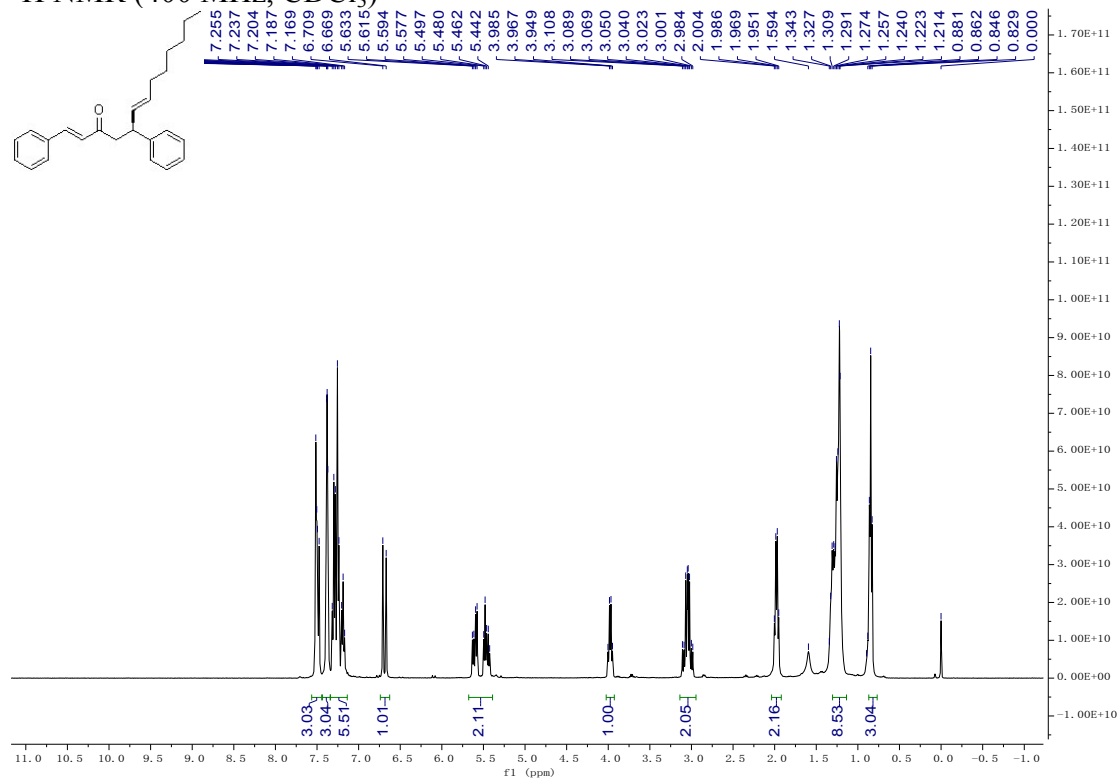

$^{13}\{^1\text{H}\}$  NMR (100 MHz,  $\text{CDCl}_3$ )

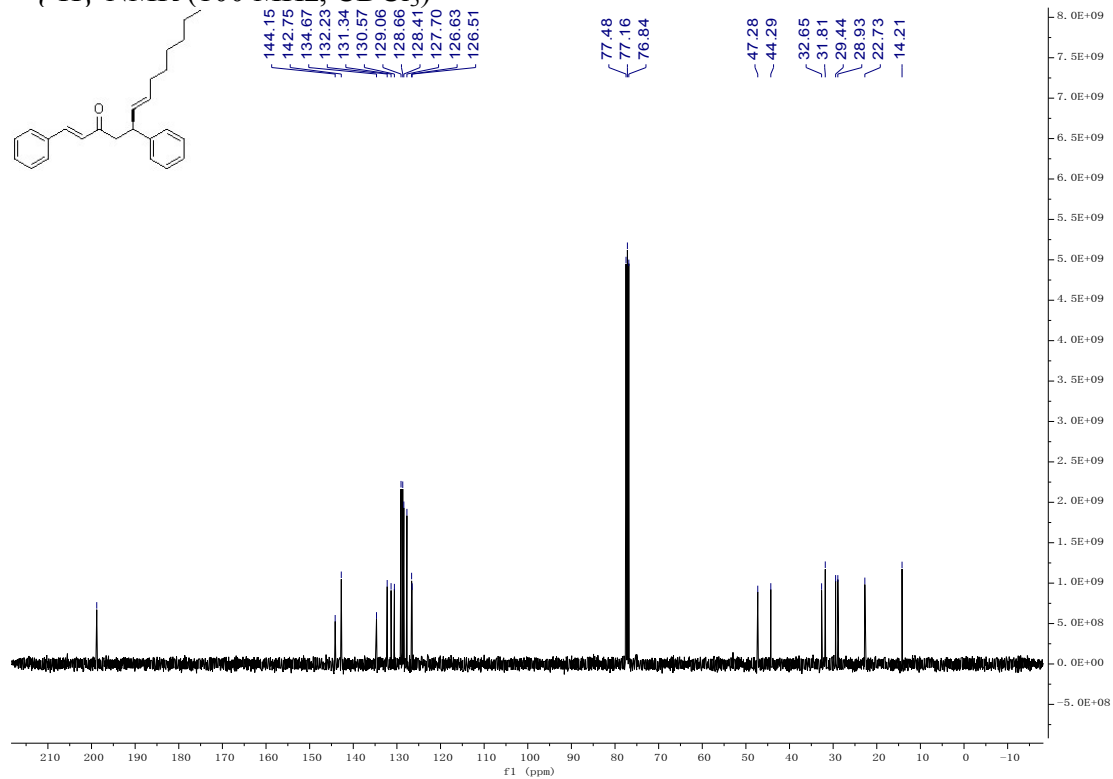

*(1S,5S)-1,5-bis(benzo[b]thiophen-2-yl)-1,5-bis(2-bromo-5-methoxyphenyl)pentan-3-one (3lh')*

$^1\text{H}$  NMR (400 MHz,  $\text{CDCl}_3$ )

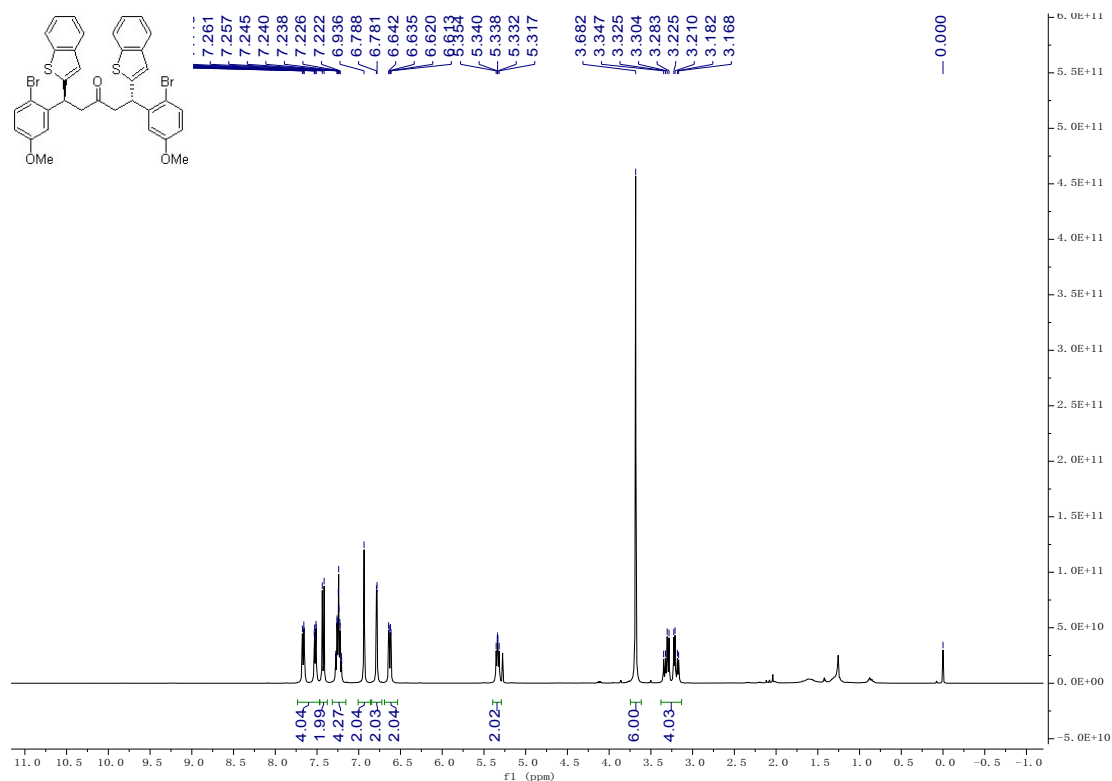

$^{13}\text{C}\{^1\text{H}\}$  NMR (150 MHz,  $\text{CDCl}_3$ )

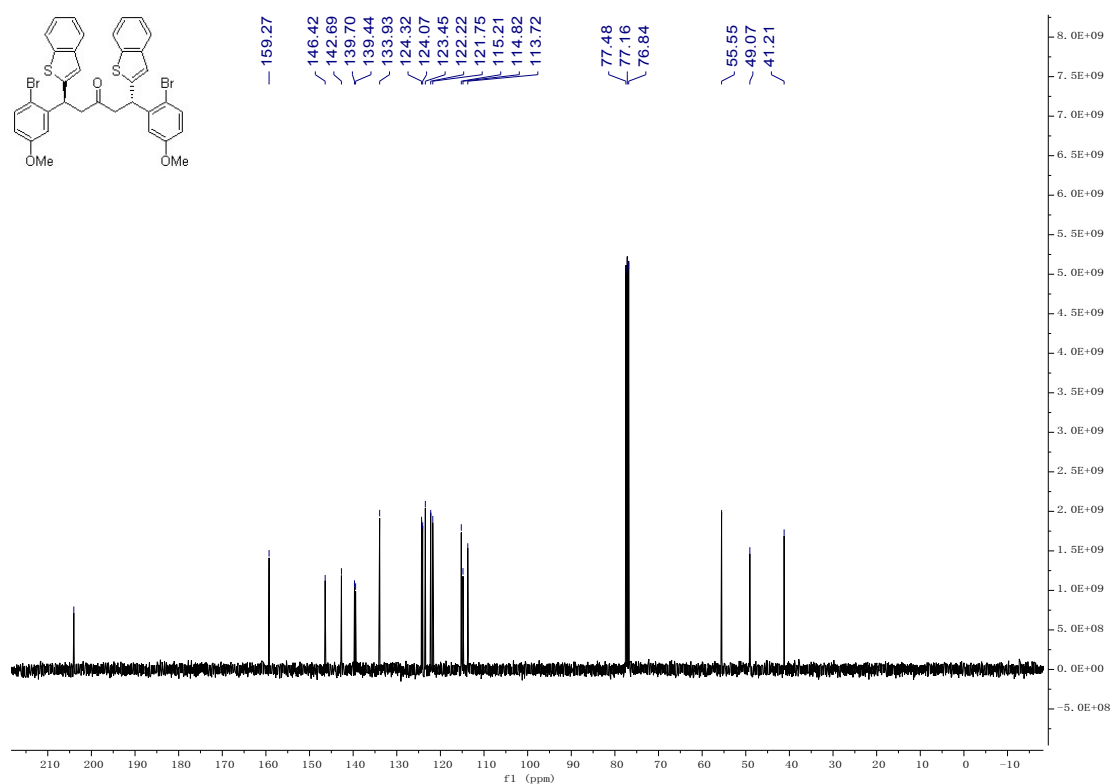

*(1E,3S,7S,8E)*-1,3,7-triphenylpentadeca-1,8-dien-5-one (**5**)

<sup>1</sup>H NMR (400 MHz, CDCl<sub>3</sub>)

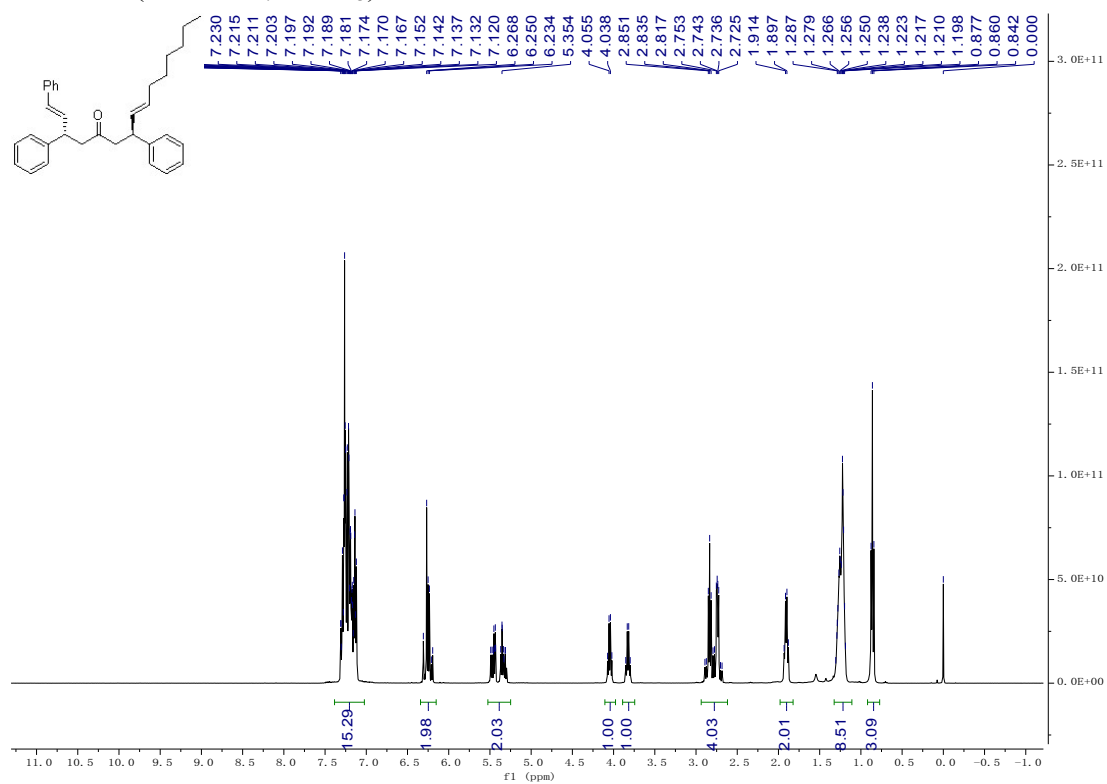

<sup>13</sup>C{<sup>1</sup>H} NMR (150 MHz, CDCl<sub>3</sub>)

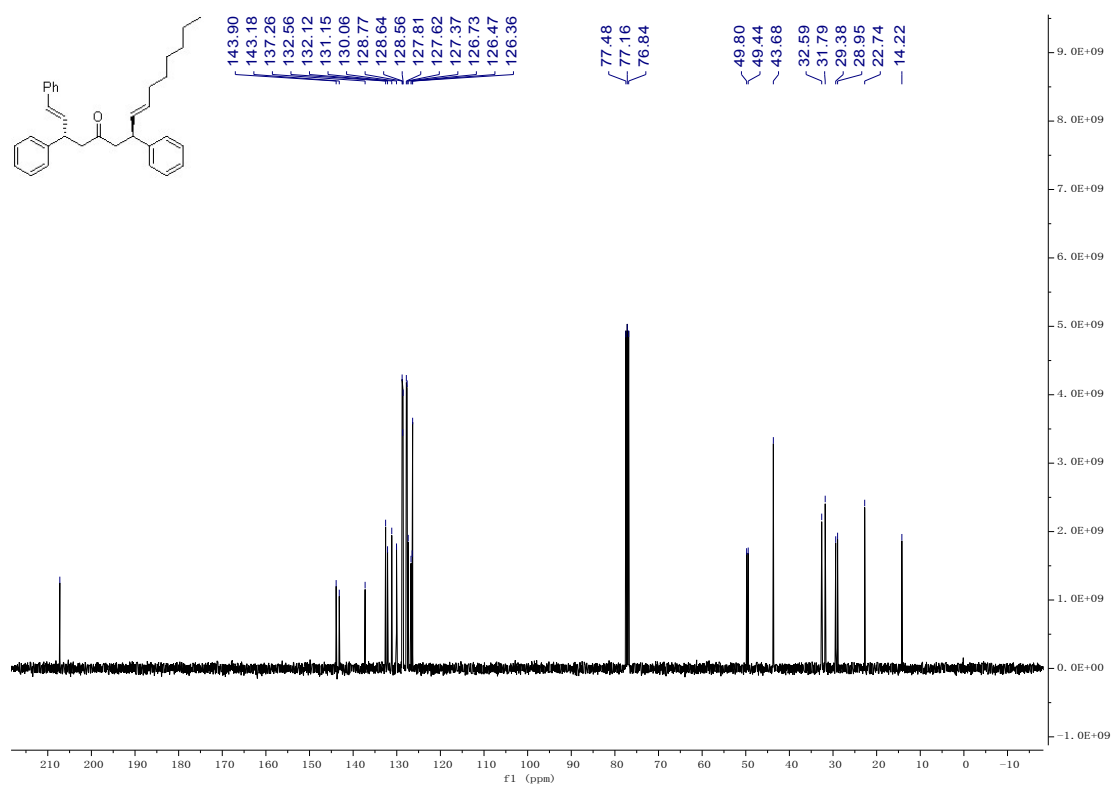

*(S)*-4-Phenyl-2-cyclopenten-1-one (**6**)

<sup>1</sup>H NMR (400 MHz, CDCl<sub>3</sub>)

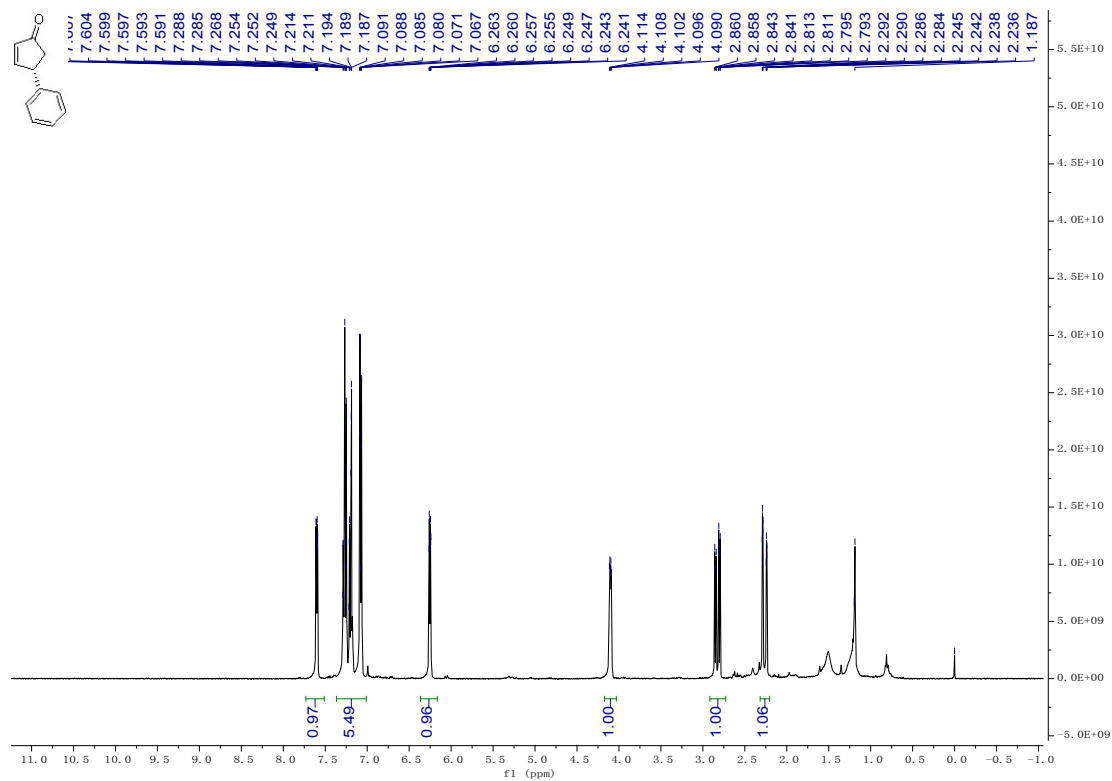

## 11. HPLC traces of optically active compounds

### Compound 3aa

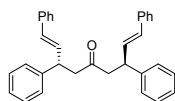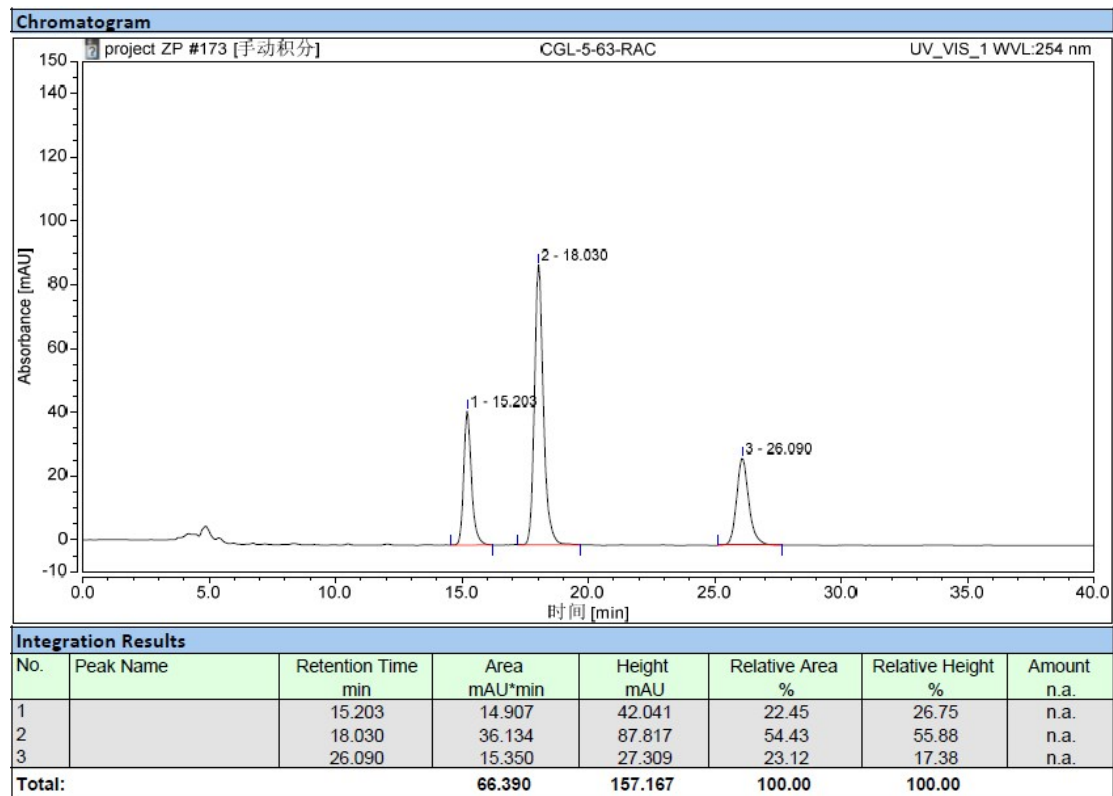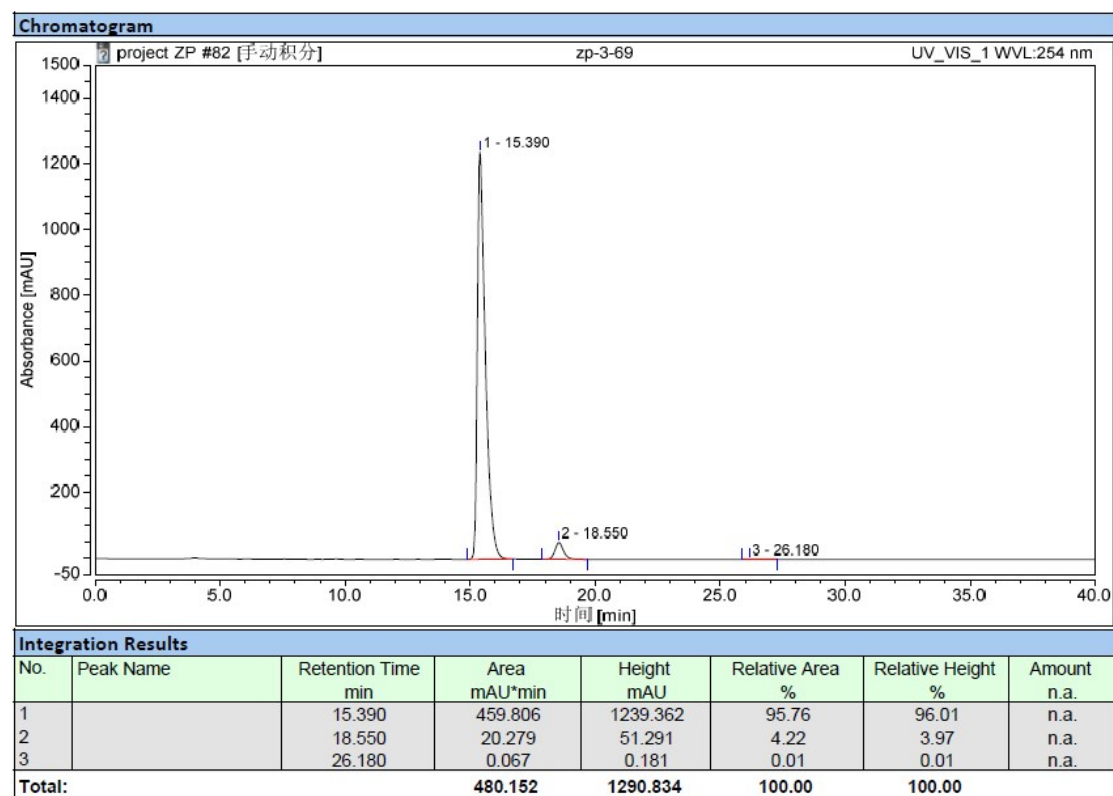

## Compound 3ba

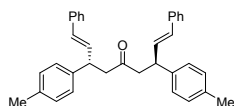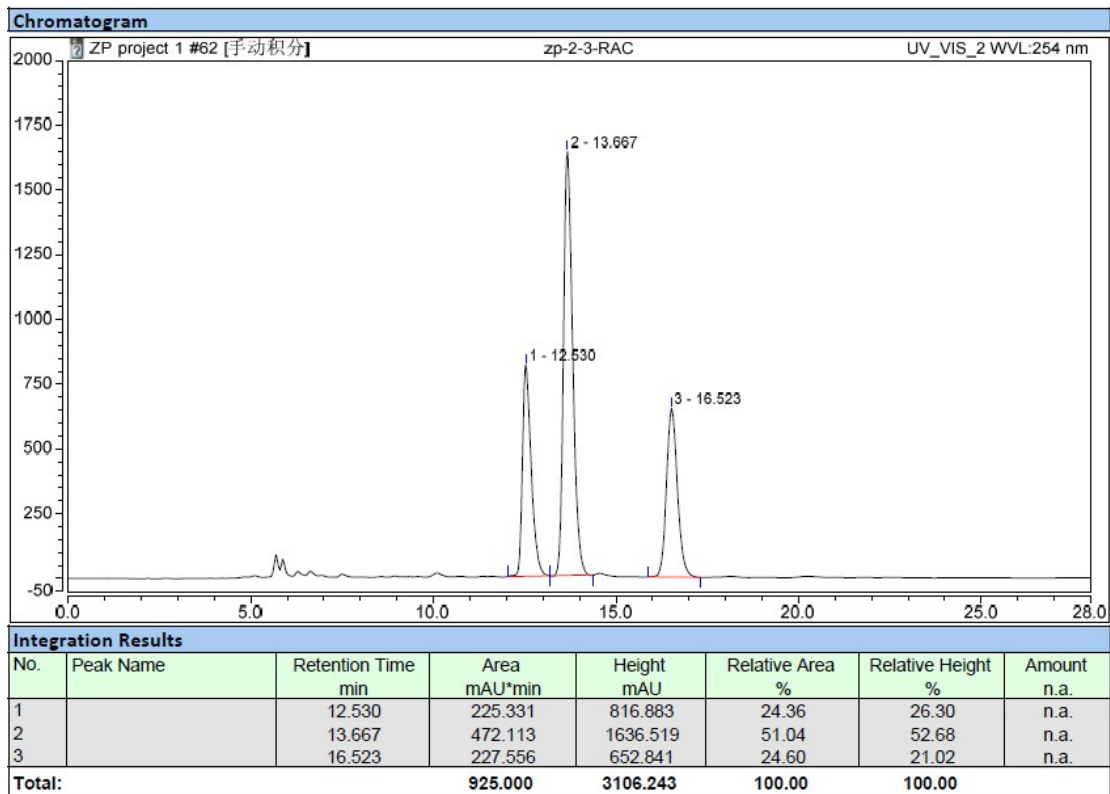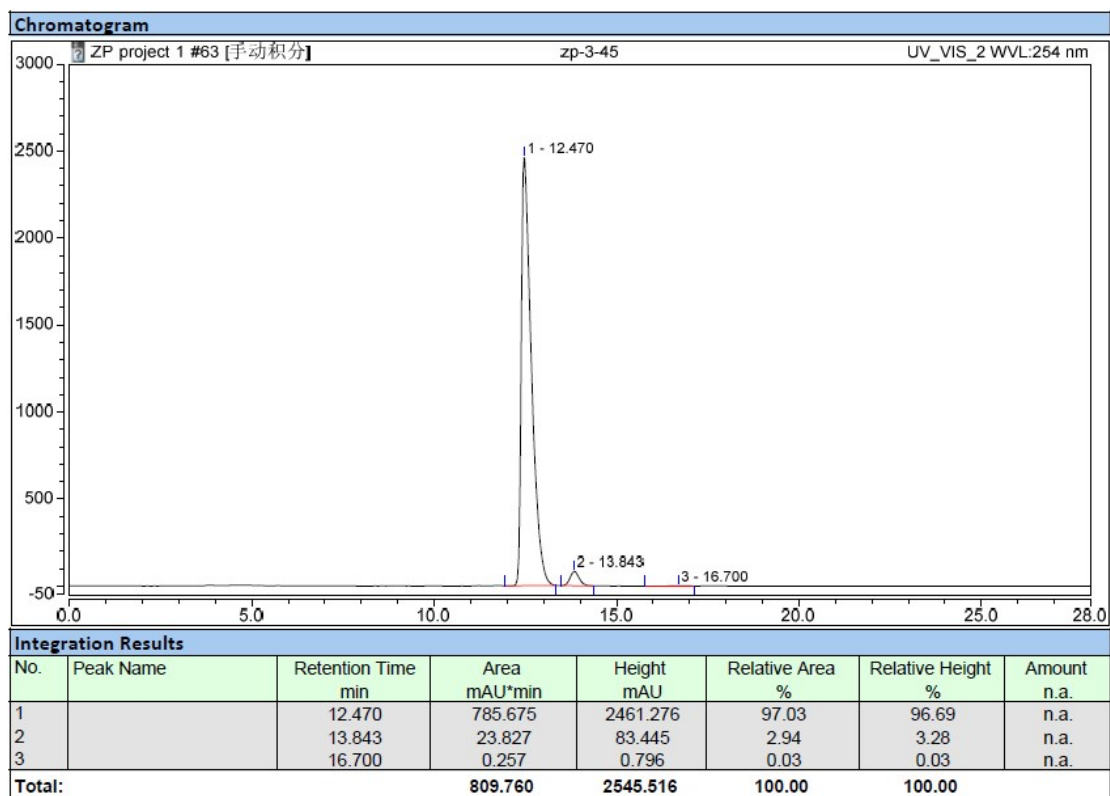

## Compound 3ca

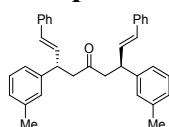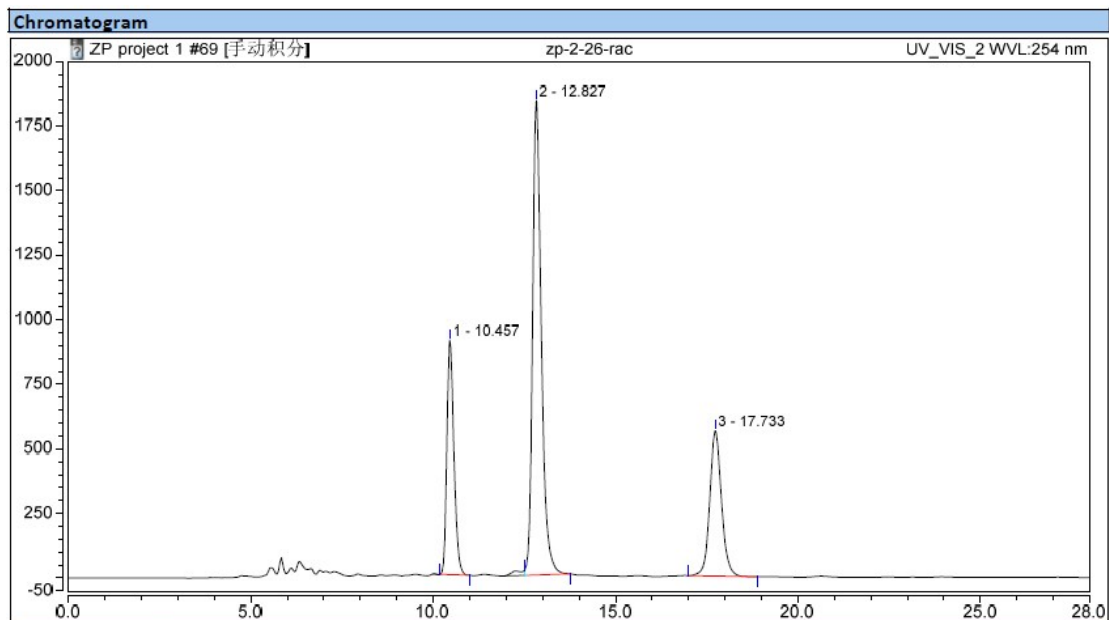

**Integration Results**

| No.           | Peak Name | Retention Time<br>min | Area<br>mAU*min | Height<br>mAU   | Relative Area<br>% | Relative Height<br>% | Amount<br>n.a. |
|---------------|-----------|-----------------------|-----------------|-----------------|--------------------|----------------------|----------------|
| 1             |           | 10.457                | 200.363         | 908.762         | 21.84              | 27.47                | n.a.           |
| 2             |           | 12.827                | 507.706         | 1836.402        | 55.35              | 55.52                | n.a.           |
| 3             |           | 17.733                | 209.220         | 562.660         | 22.81              | 17.01                | n.a.           |
| <b>Total:</b> |           |                       | <b>917.290</b>  | <b>3307.825</b> | <b>100.00</b>      | <b>100.00</b>        |                |

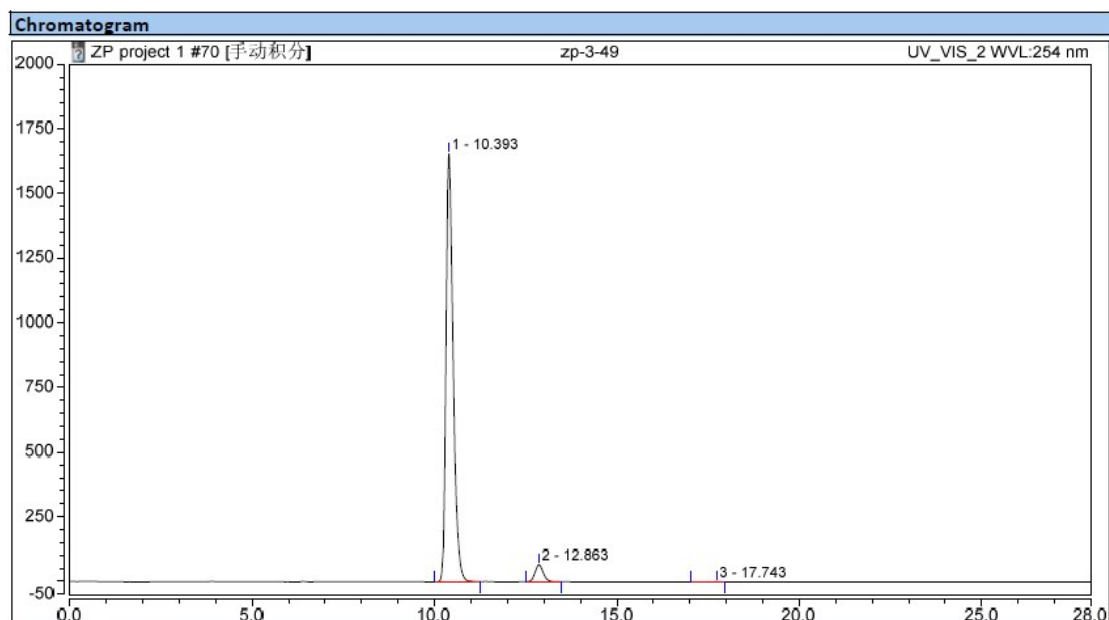

**Integration Results**

| No.           | Peak Name | Retention Time<br>min | Area<br>mAU*min | Height<br>mAU   | Relative Area<br>% | Relative Height<br>% | Amount<br>n.a. |
|---------------|-----------|-----------------------|-----------------|-----------------|--------------------|----------------------|----------------|
| 1             |           | 10.393                | 370.388         | 1655.885        | 95.51              | 96.11                | n.a.           |
| 2             |           | 12.863                | 17.316          | 66.639          | 4.47               | 3.87                 | n.a.           |
| 3             |           | 17.743                | 0.083           | 0.410           | 0.02               | 0.02                 | n.a.           |
| <b>Total:</b> |           |                       | <b>387.787</b>  | <b>1722.934</b> | <b>100.00</b>      | <b>100.00</b>        |                |



# Compound 3da

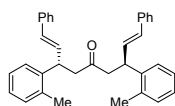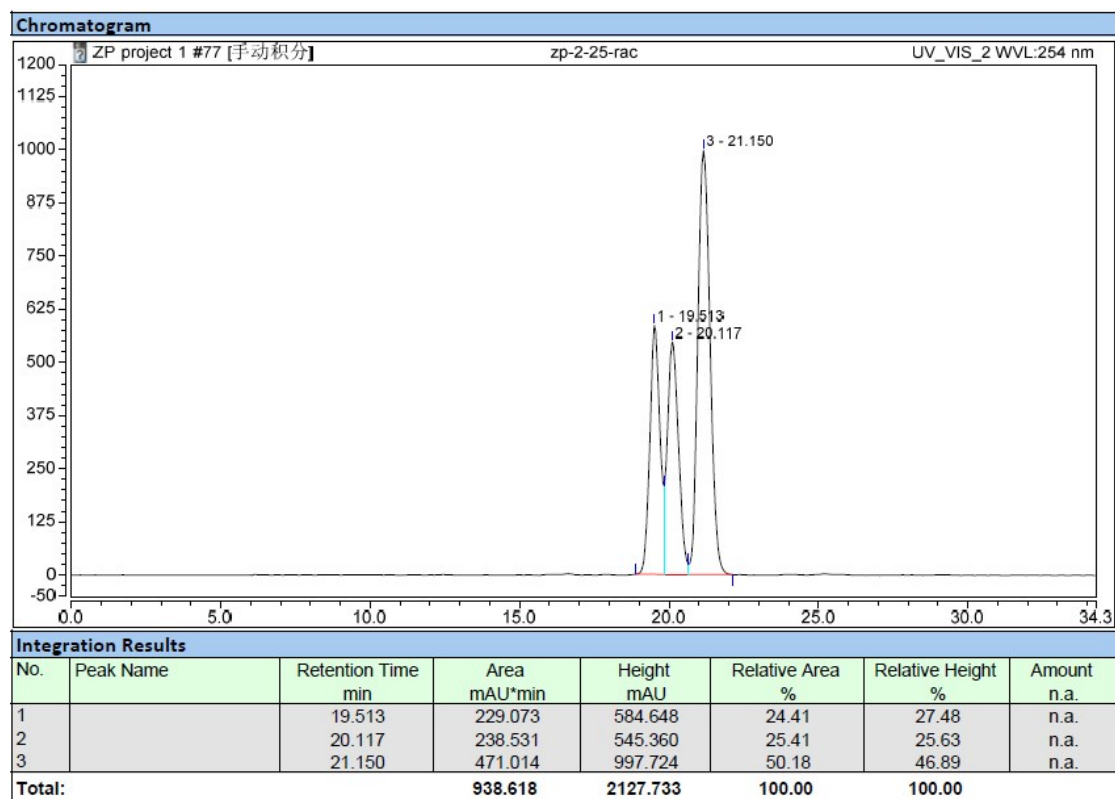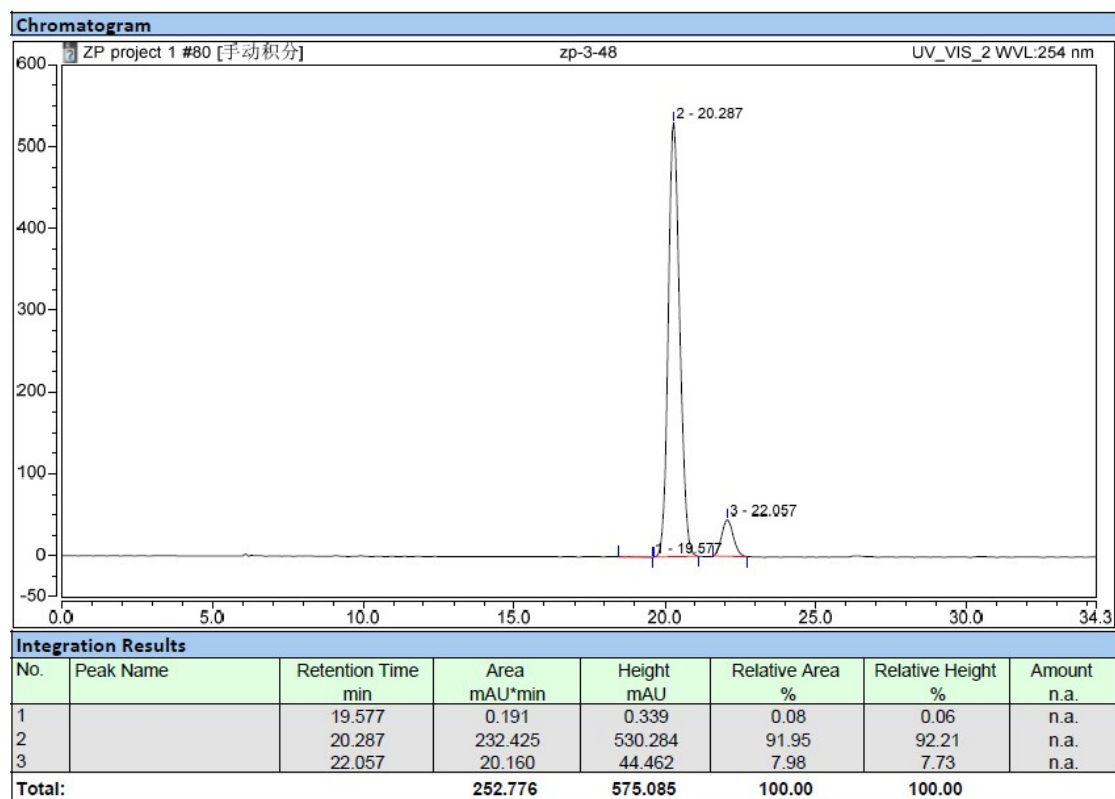

## Compound 3ea

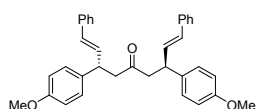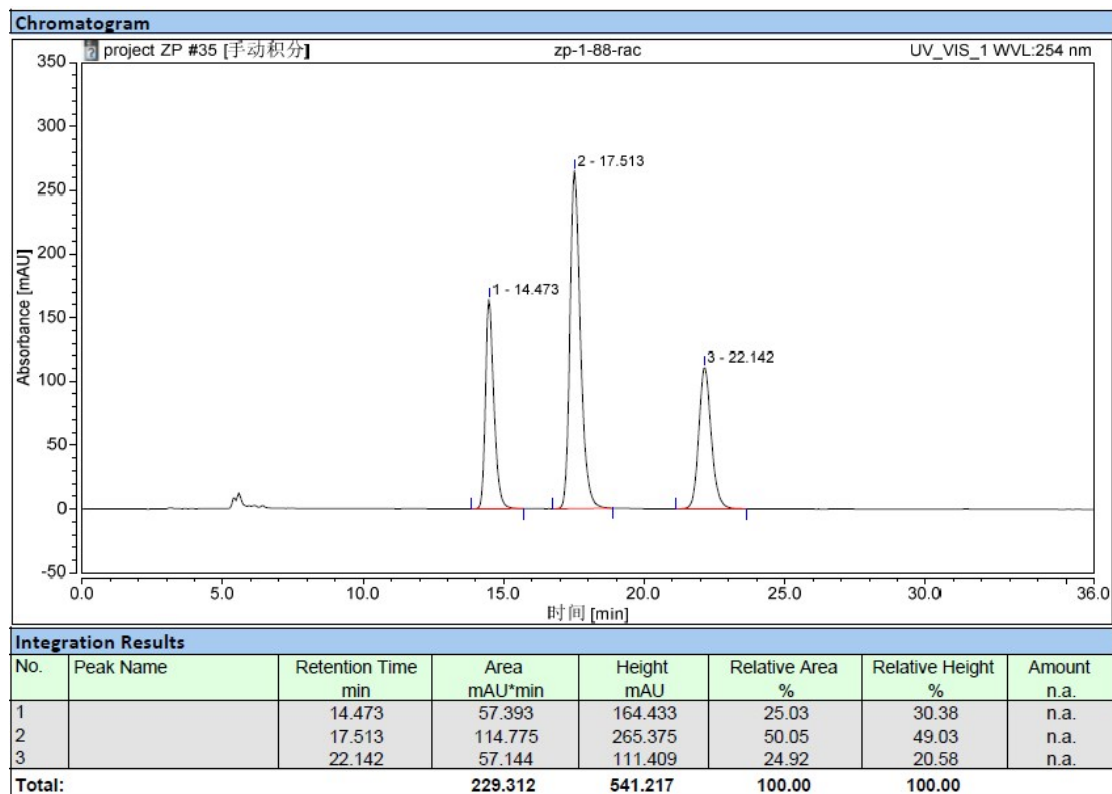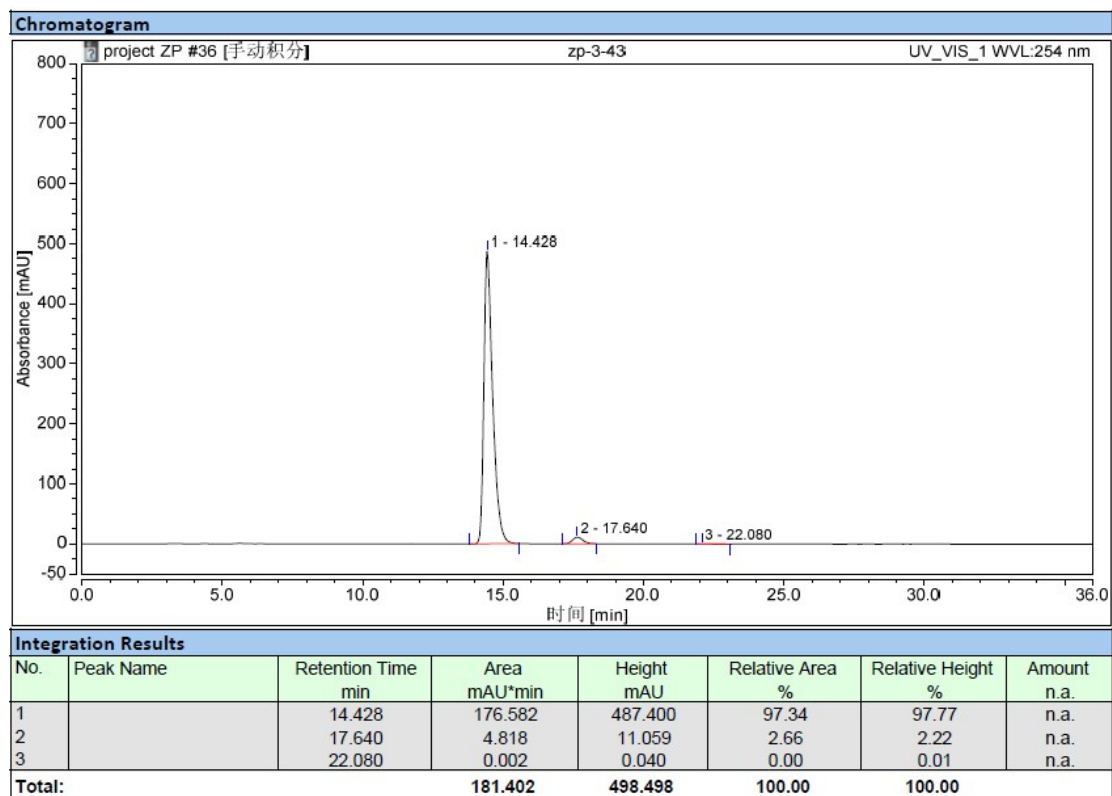

## Compound 3fa

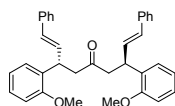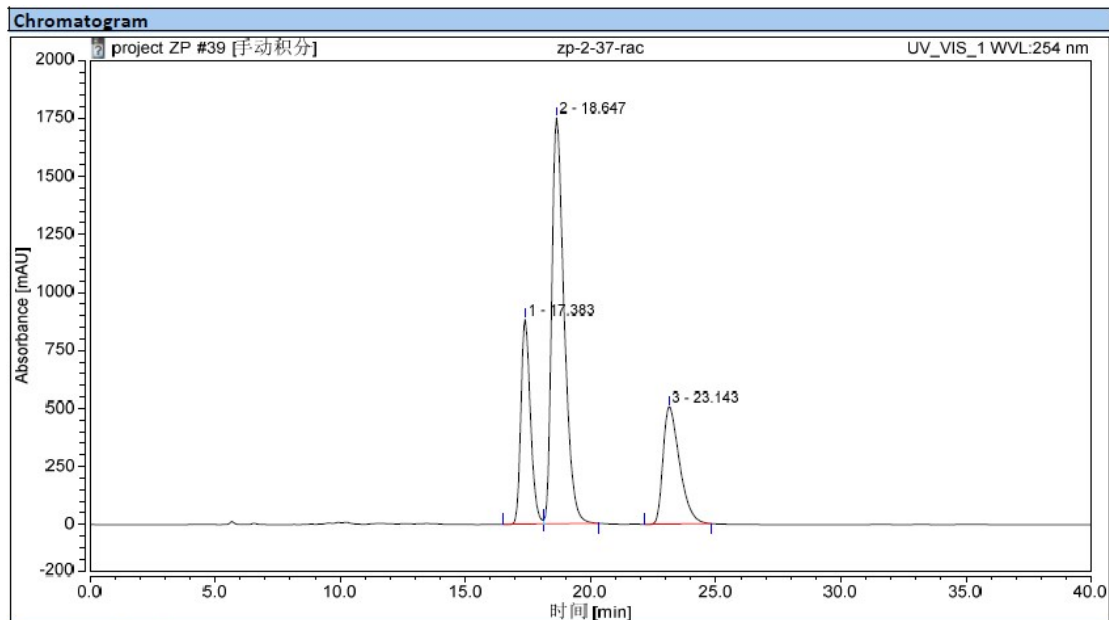

**Integration Results**

| No.           | Peak Name | Retention Time<br>min | Area<br>mAU*min | Height<br>mAU   | Relative Area<br>% | Relative Height<br>% | Amount |
|---------------|-----------|-----------------------|-----------------|-----------------|--------------------|----------------------|--------|
| 1             |           | 17.383                | 389.181         | 881.319         | 21.84              | 28.09                | n.a.   |
| 2             |           | 18.647                | 1005.087        | 1749.433        | 56.42              | 55.76                | n.a.   |
| 3             |           | 23.143                | 387.307         | 506.473         | 21.74              | 16.14                | n.a.   |
| <b>Total:</b> |           |                       | <b>1781.576</b> | <b>3137.225</b> | <b>100.00</b>      | <b>100.00</b>        |        |

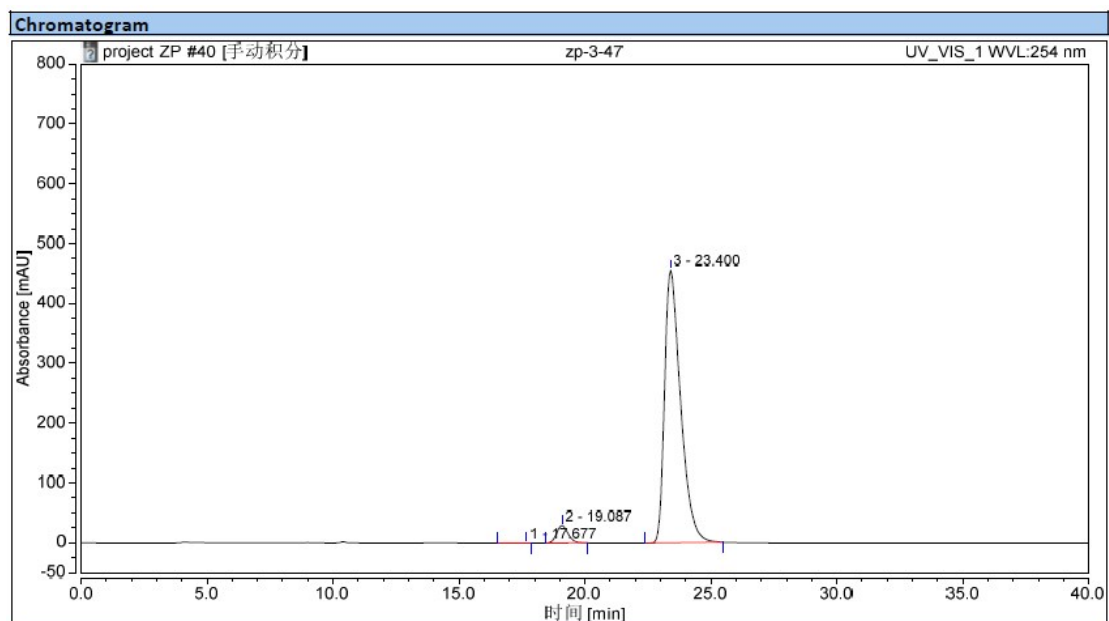

**Integration Results**

| No.           | Peak Name | Retention Time<br>min | Area<br>mAU*min | Height<br>mAU  | Relative Area<br>% | Relative Height<br>% | Amount |
|---------------|-----------|-----------------------|-----------------|----------------|--------------------|----------------------|--------|
| 1             |           | 17.677                | 0.004           | 0.093          | 0.00               | 0.02                 | n.a.   |
| 2             |           | 19.087                | 15.421          | 29.164         | 4.39               | 6.02                 | n.a.   |
| 3             |           | 23.400                | 335.562         | 455.341        | 95.61              | 93.96                | n.a.   |
| <b>Total:</b> |           |                       | <b>350.988</b>  | <b>484.598</b> | <b>100.00</b>      | <b>100.00</b>        |        |

## Compound 3ga

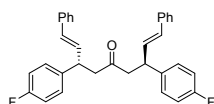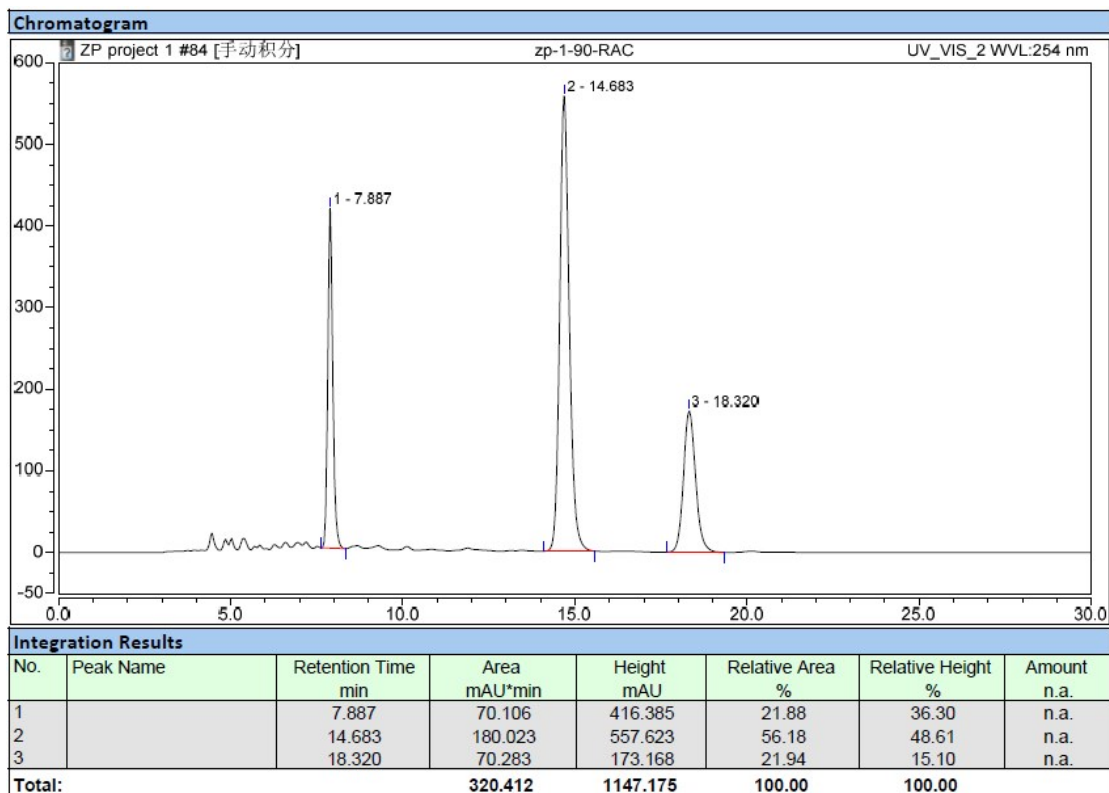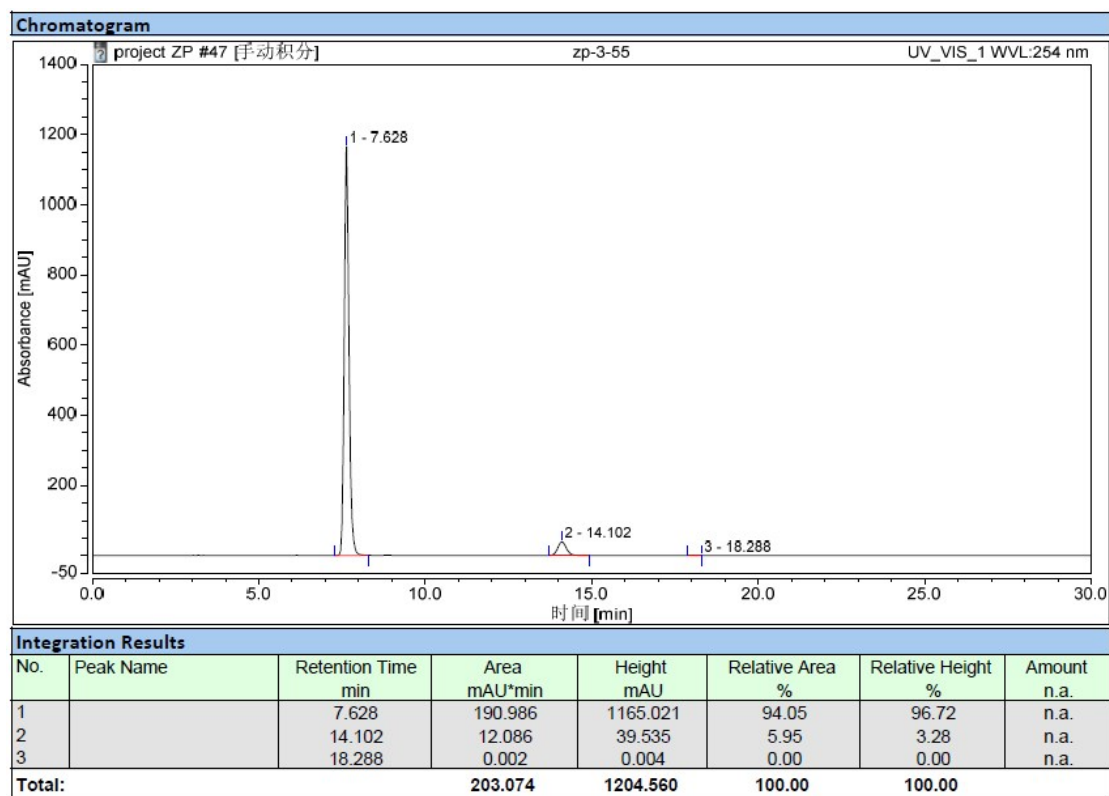

## Compound 3ha

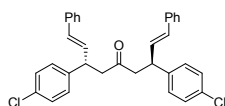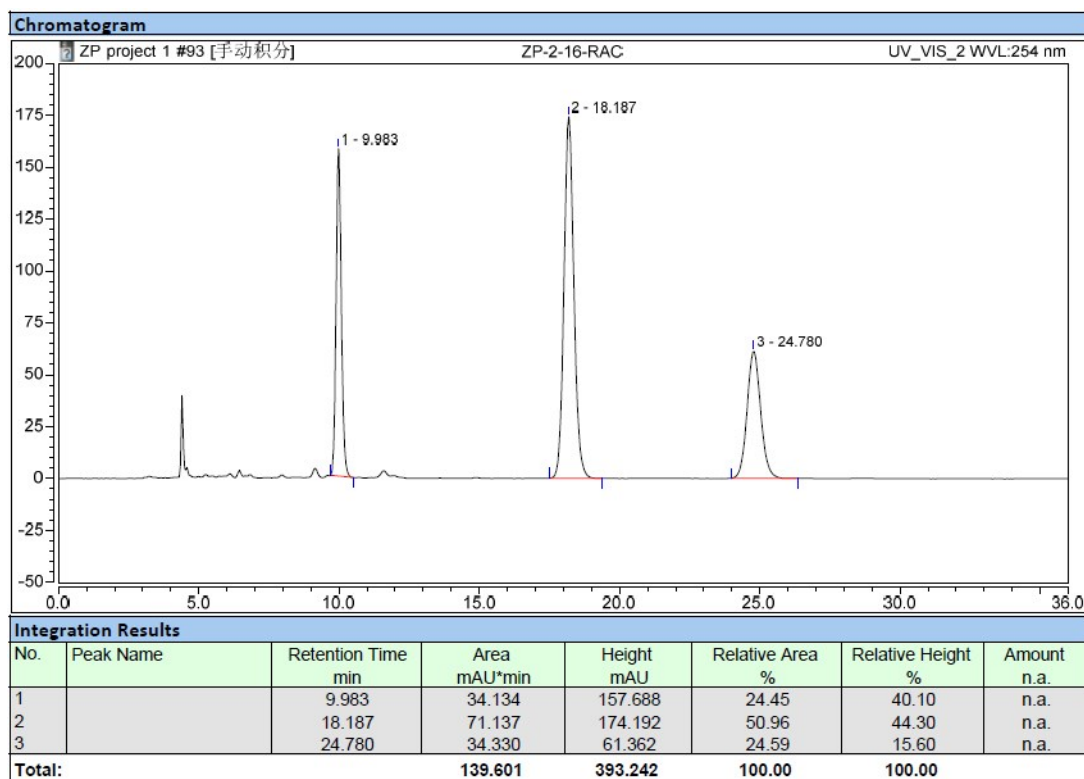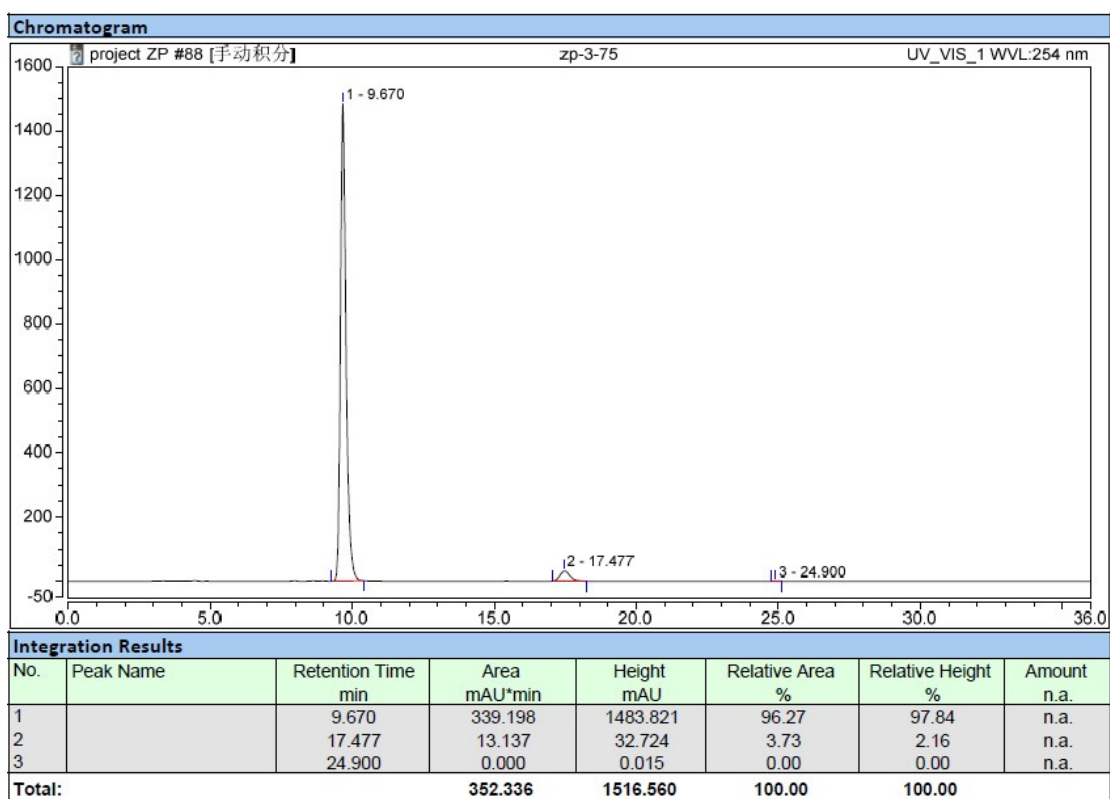

## Compound 3ia

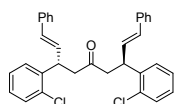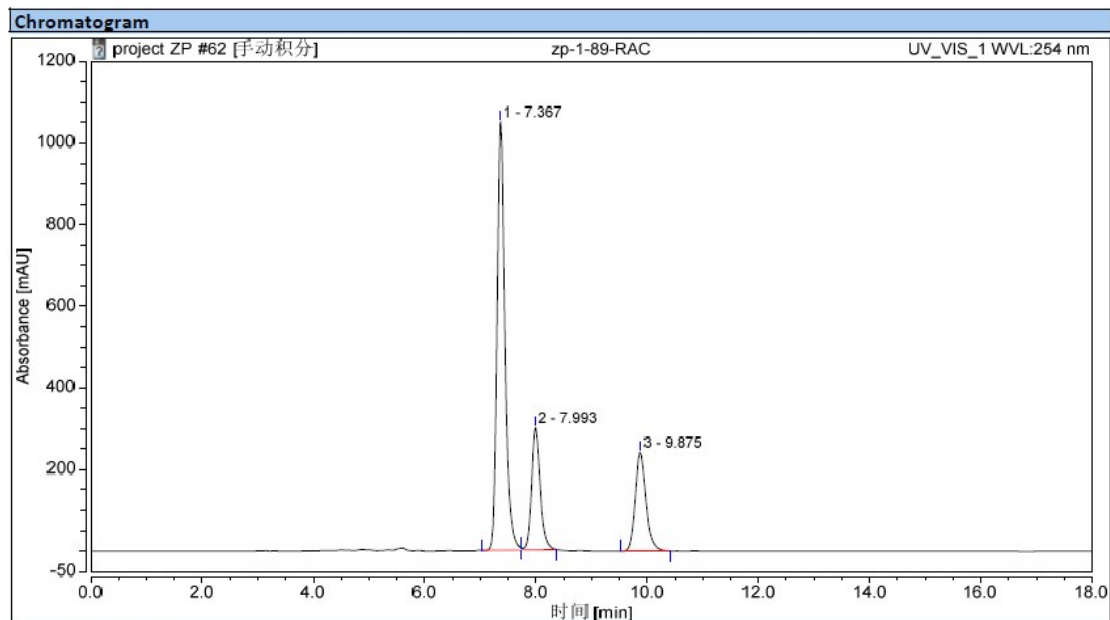

**Integration Results**

| No.           | Peak Name | Retention Time<br>min | Area<br>mAU*min | Height<br>mAU   | Relative Area<br>% | Relative Height<br>% | Amount<br>n.a. |
|---------------|-----------|-----------------------|-----------------|-----------------|--------------------|----------------------|----------------|
| 1             |           | 7.367                 | 172.102         | 1050.097        | 61.54              | 65.96                | n.a.           |
| 2             |           | 7.993                 | 53.777          | 299.323         | 19.23              | 18.80                | n.a.           |
| 3             |           | 9.875                 | 53.771          | 242.672         | 19.23              | 15.24                | n.a.           |
| <b>Total:</b> |           |                       | <b>279.650</b>  | <b>1592.092</b> | <b>100.00</b>      | <b>100.00</b>        |                |

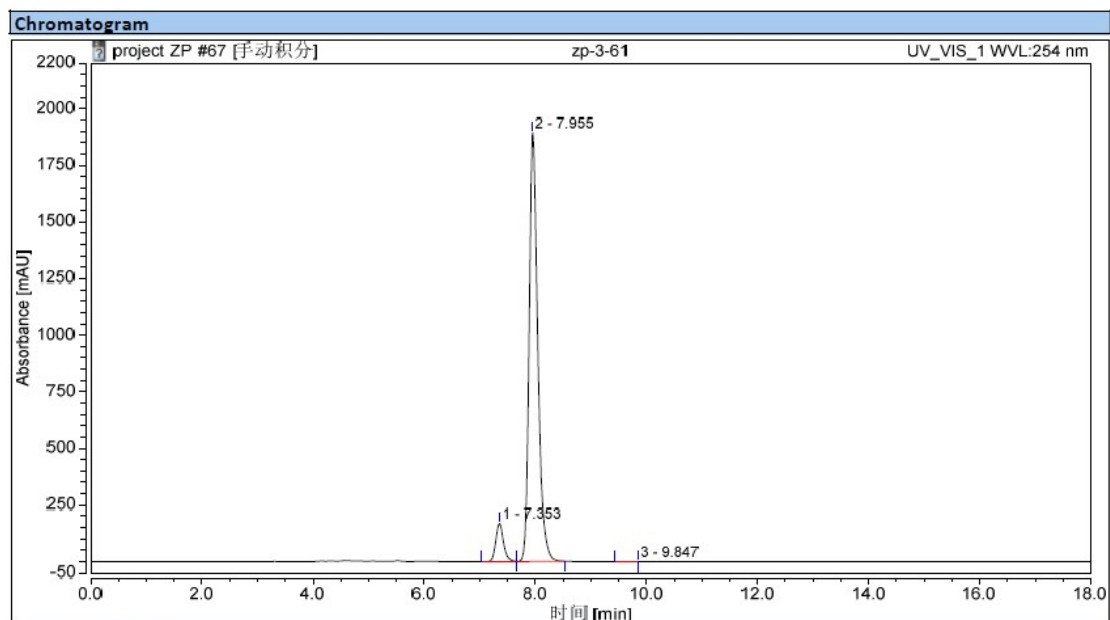

**Integration Results**

| No.           | Peak Name | Retention Time<br>min | Area<br>mAU*min | Height<br>mAU   | Relative Area<br>% | Relative Height<br>% | Amount<br>n.a. |
|---------------|-----------|-----------------------|-----------------|-----------------|--------------------|----------------------|----------------|
| 1             |           | 7.353                 | 26.976          | 169.315         | 7.36               | 8.22                 | n.a.           |
| 2             |           | 7.955                 | 339.701         | 1891.332        | 92.64              | 91.78                | n.a.           |
| 3             |           | 9.847                 | 0.003           | 0.007           | 0.00               | 0.00                 | n.a.           |
| <b>Total:</b> |           |                       | <b>366.680</b>  | <b>2060.654</b> | <b>100.00</b>      | <b>100.00</b>        |                |

## Compound 3ja

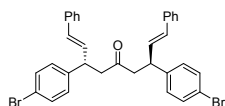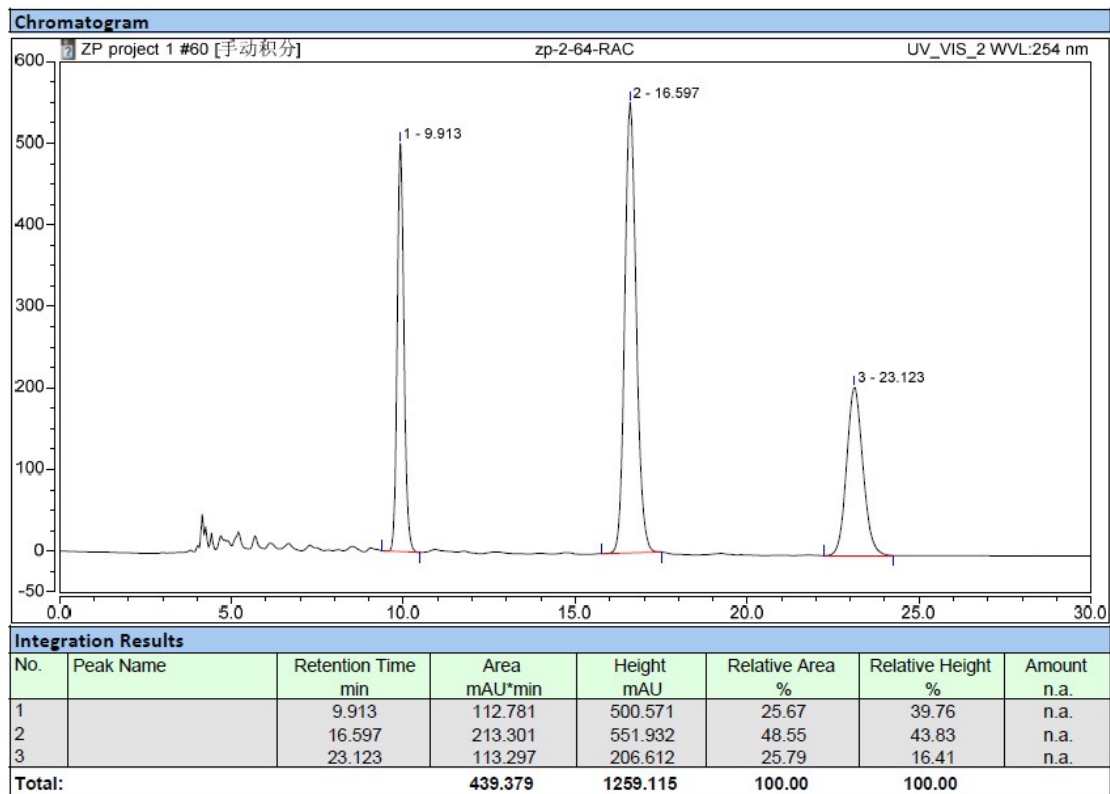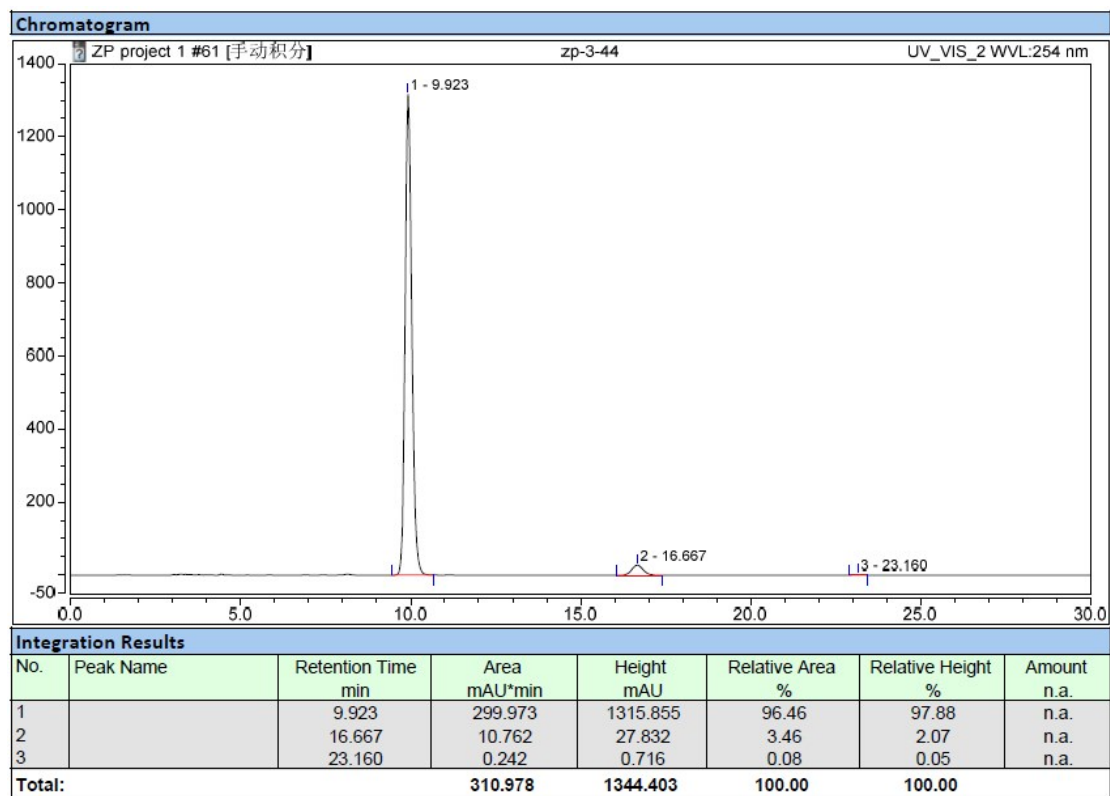

## Compound 3ka

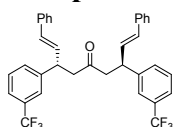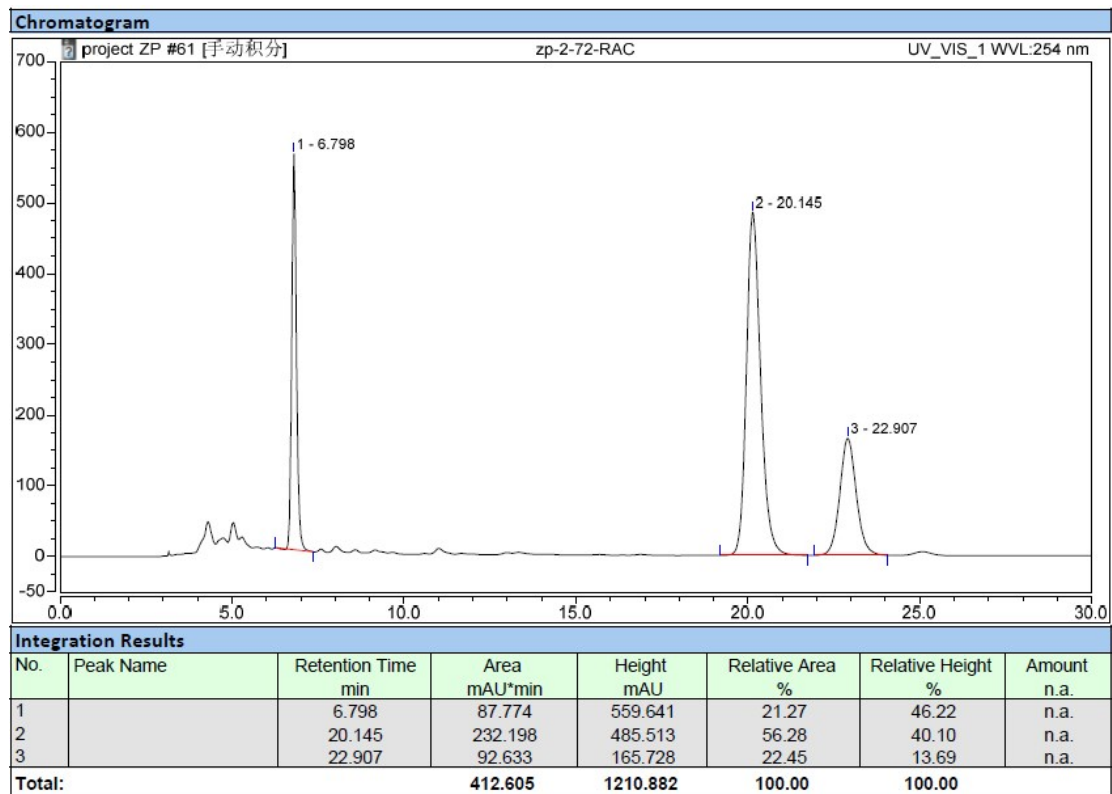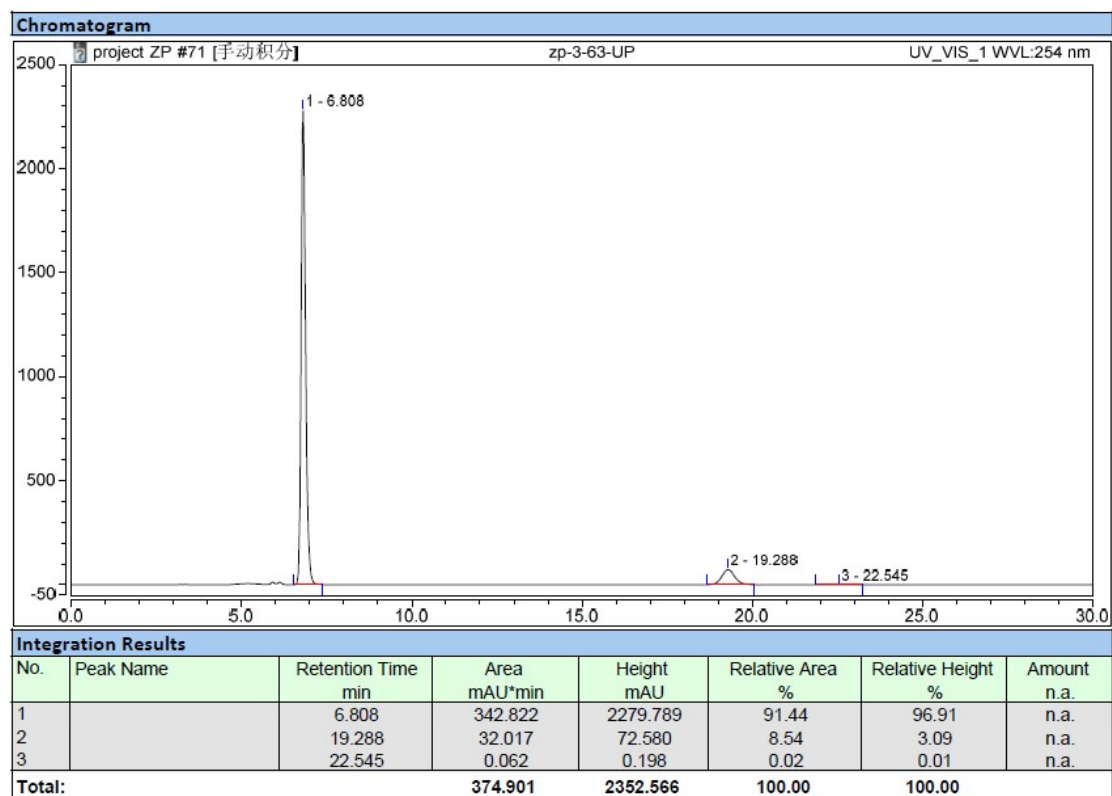



## Compound 3la

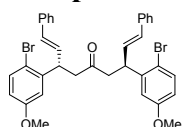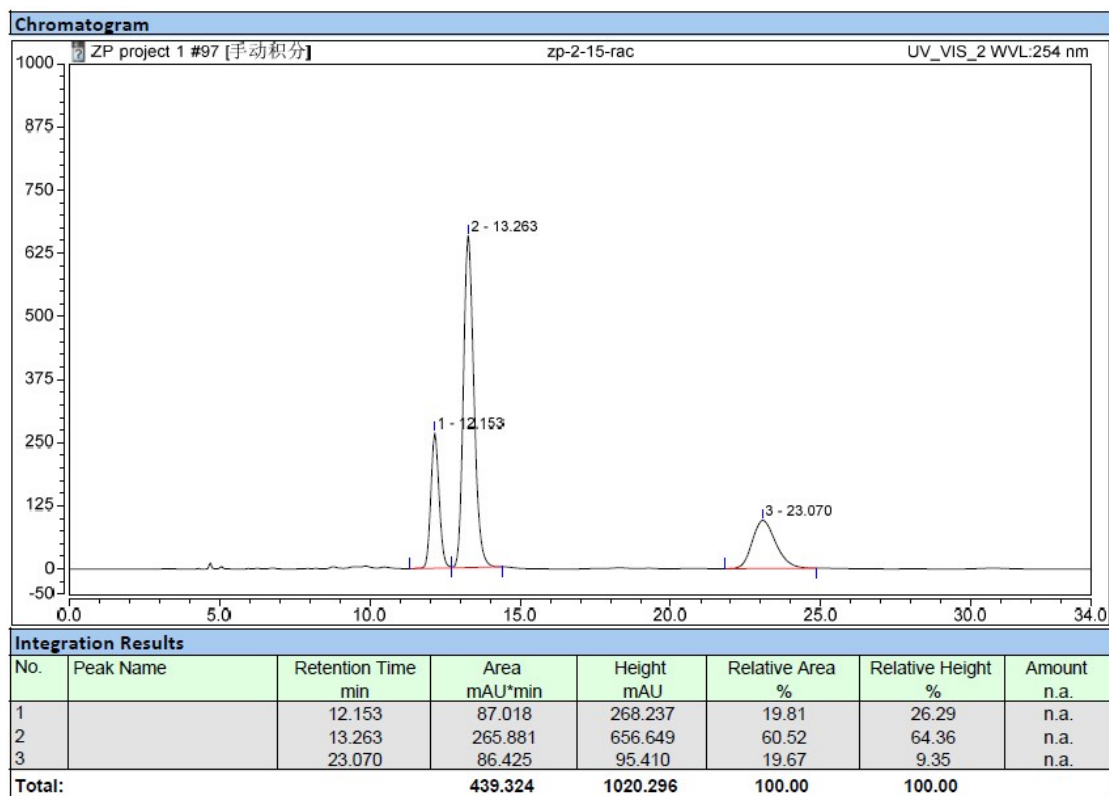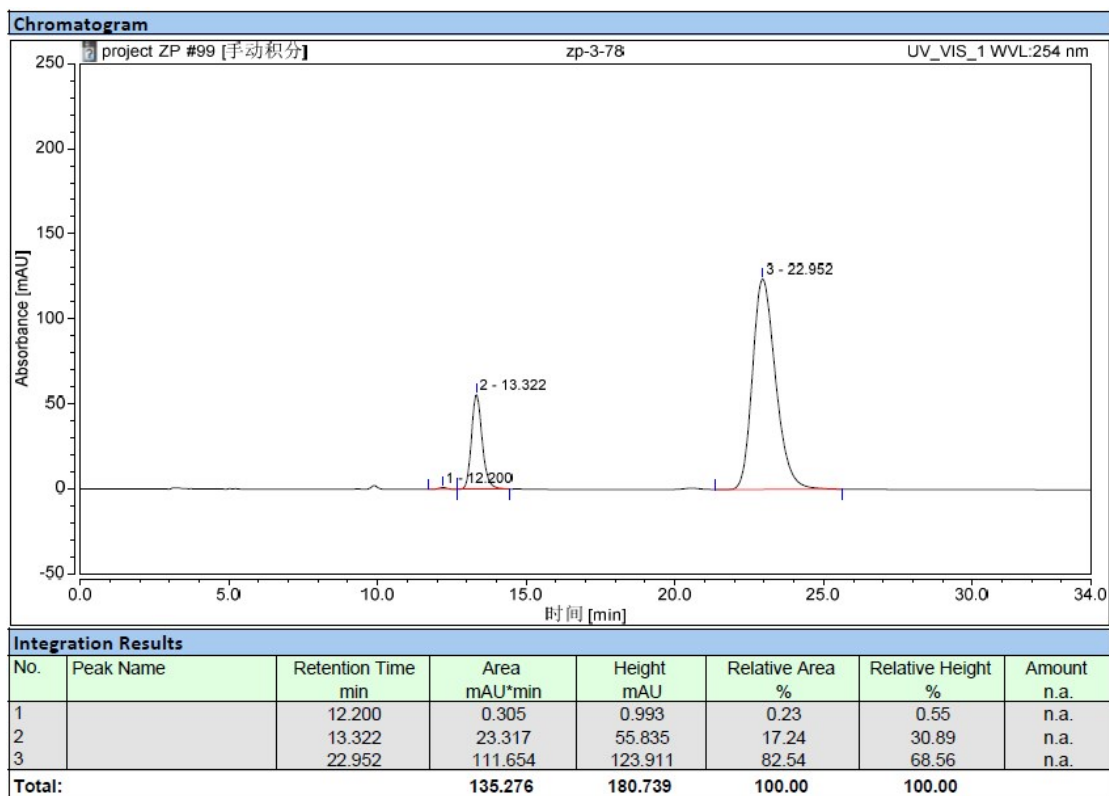

# Compound 3ma

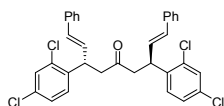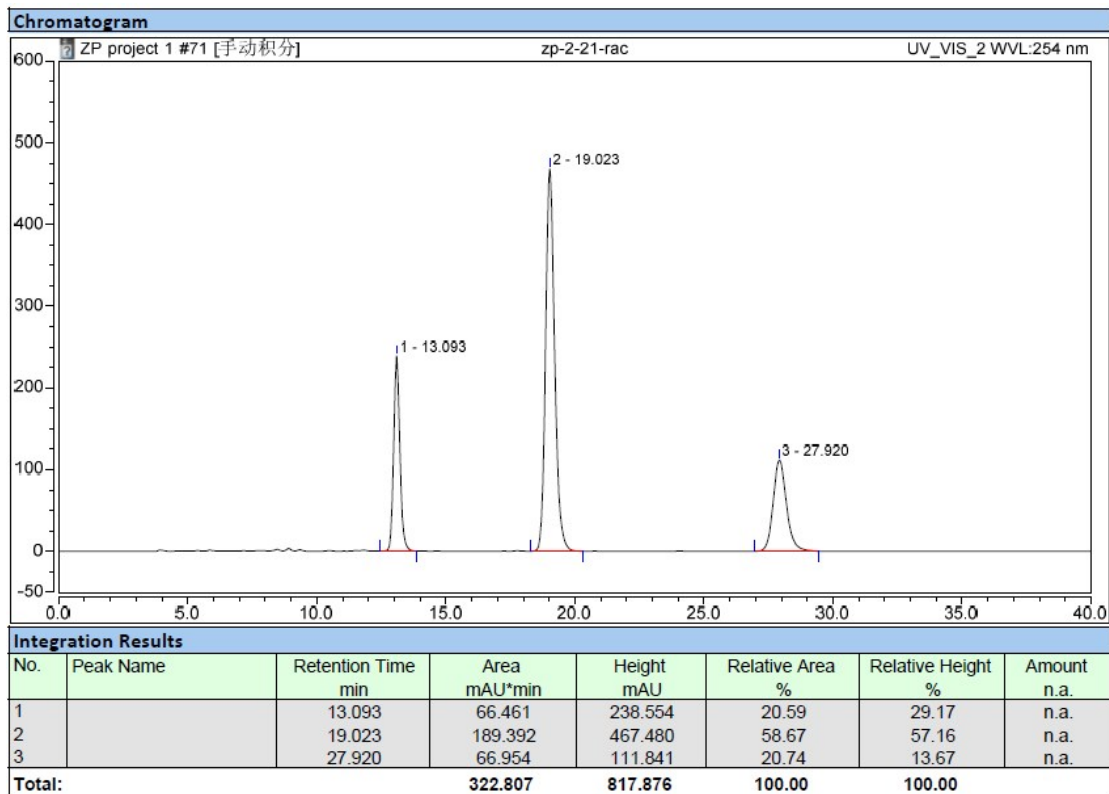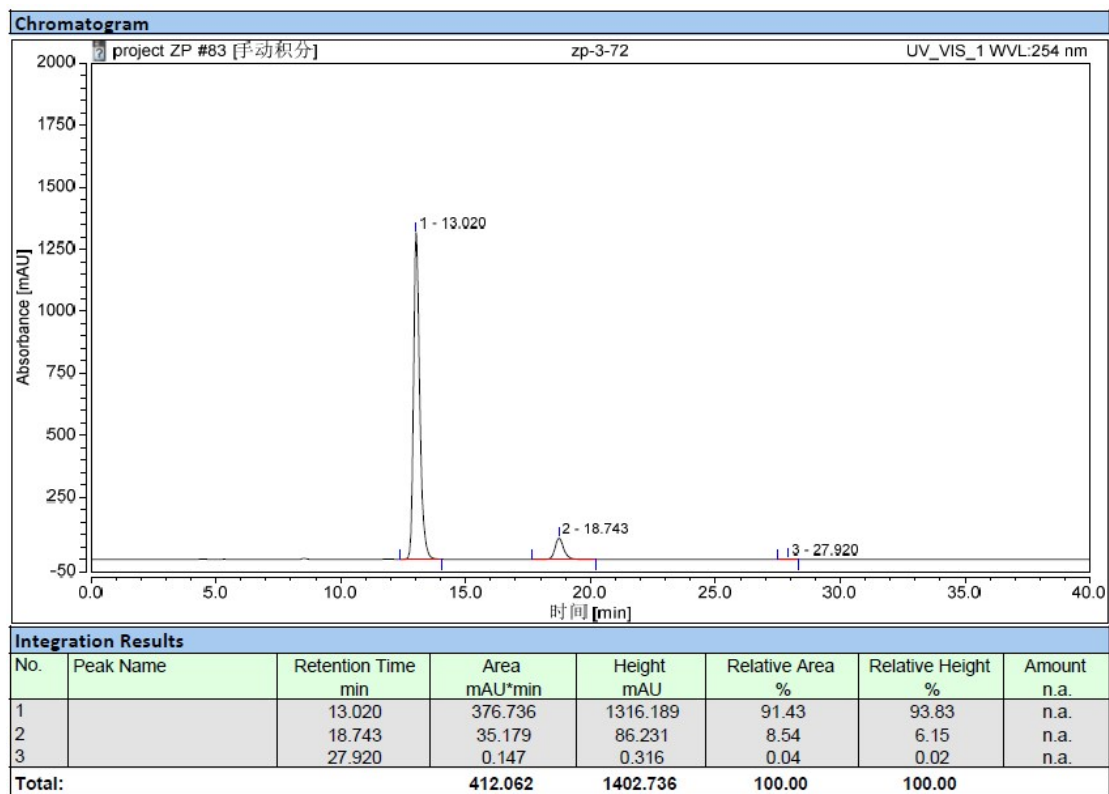

## Compound 3na

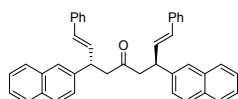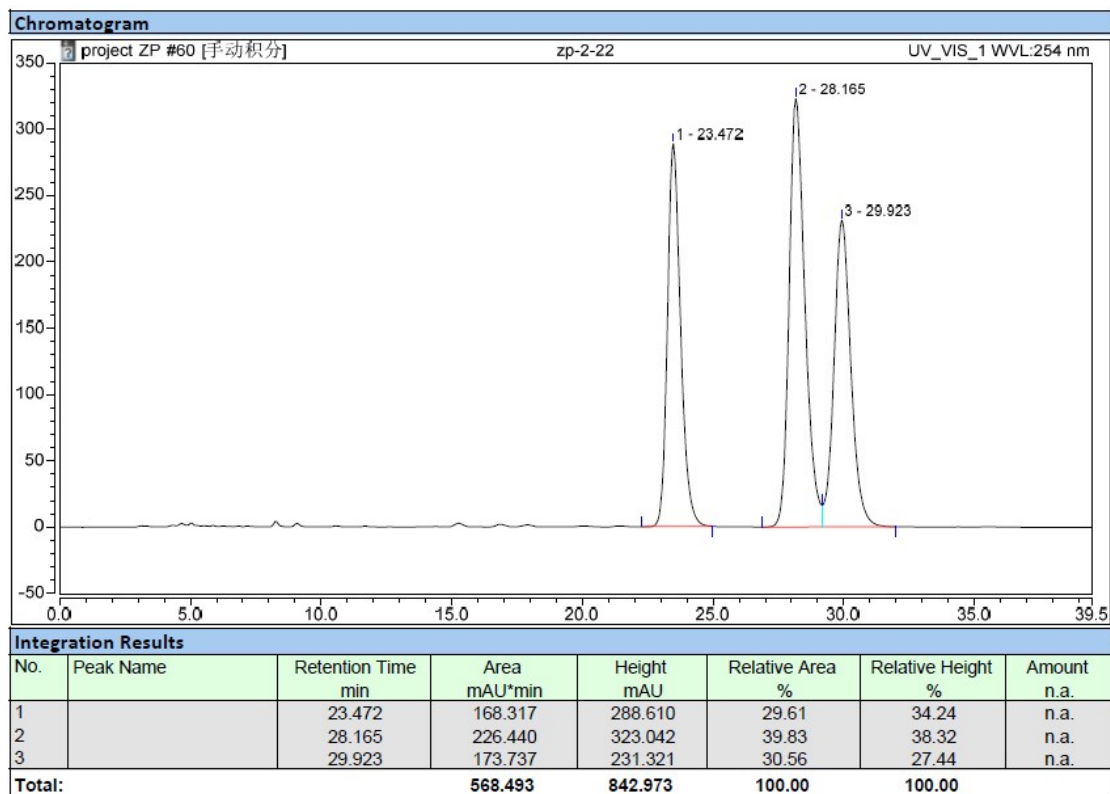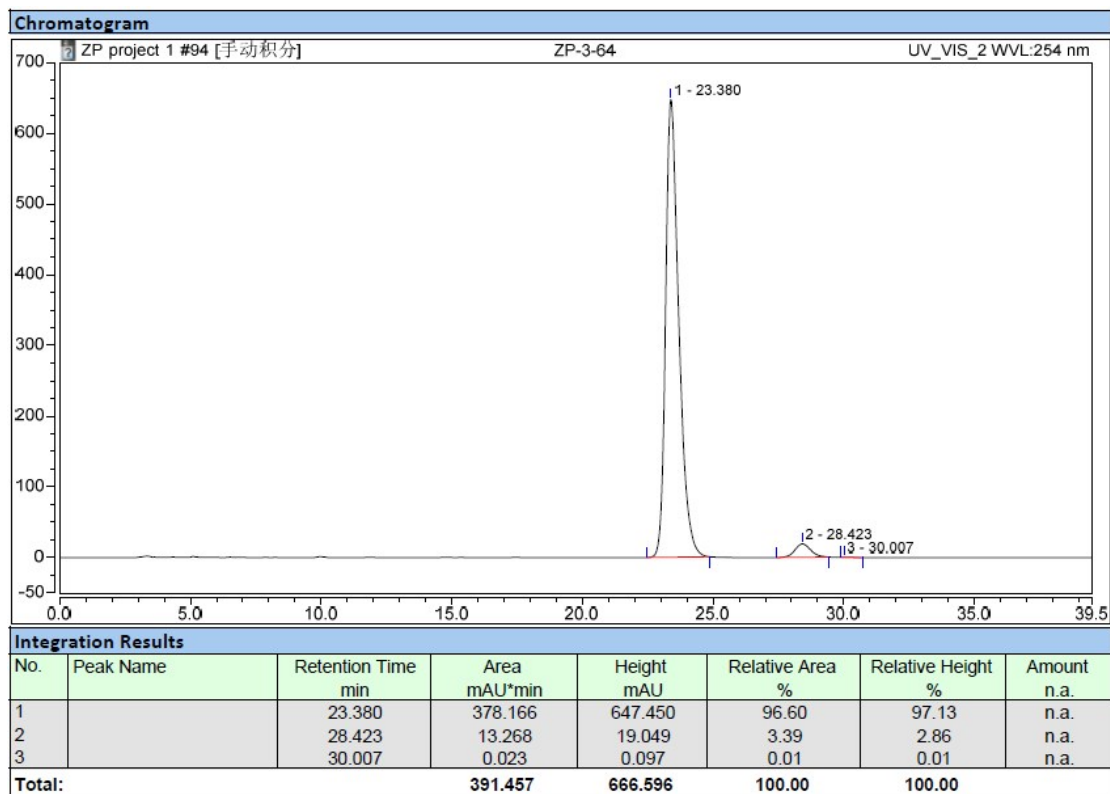

## Compound 30a

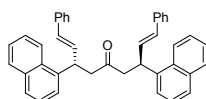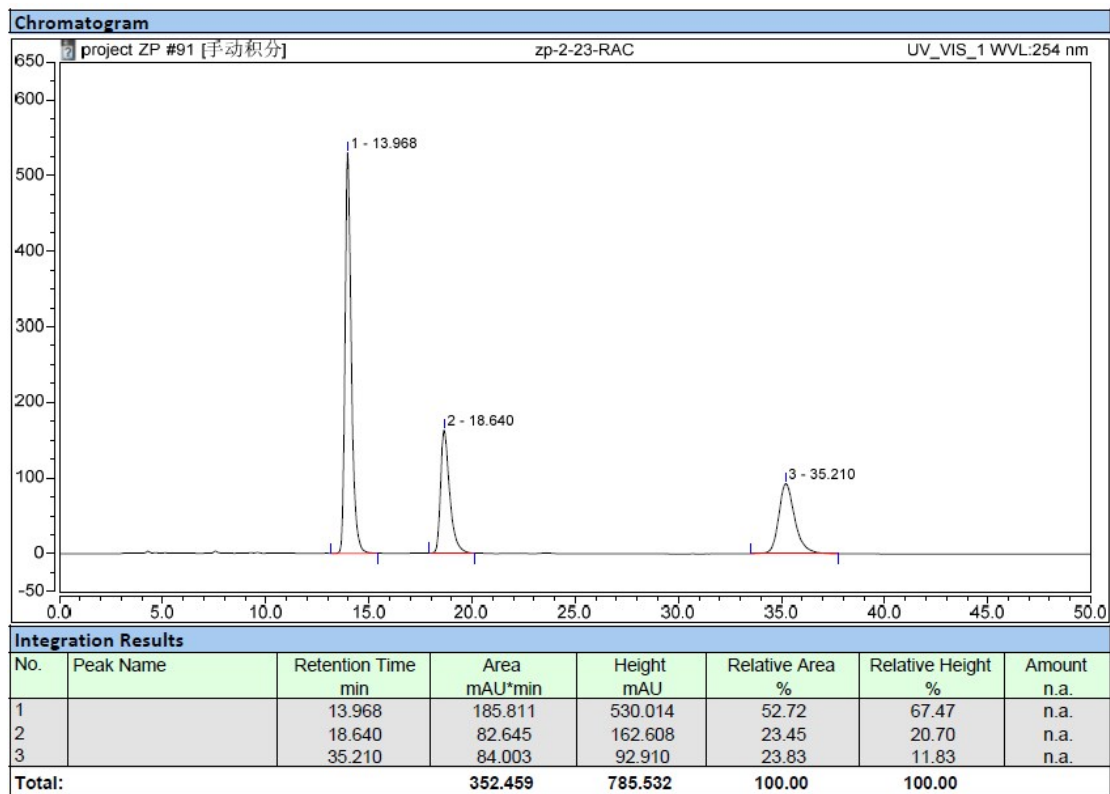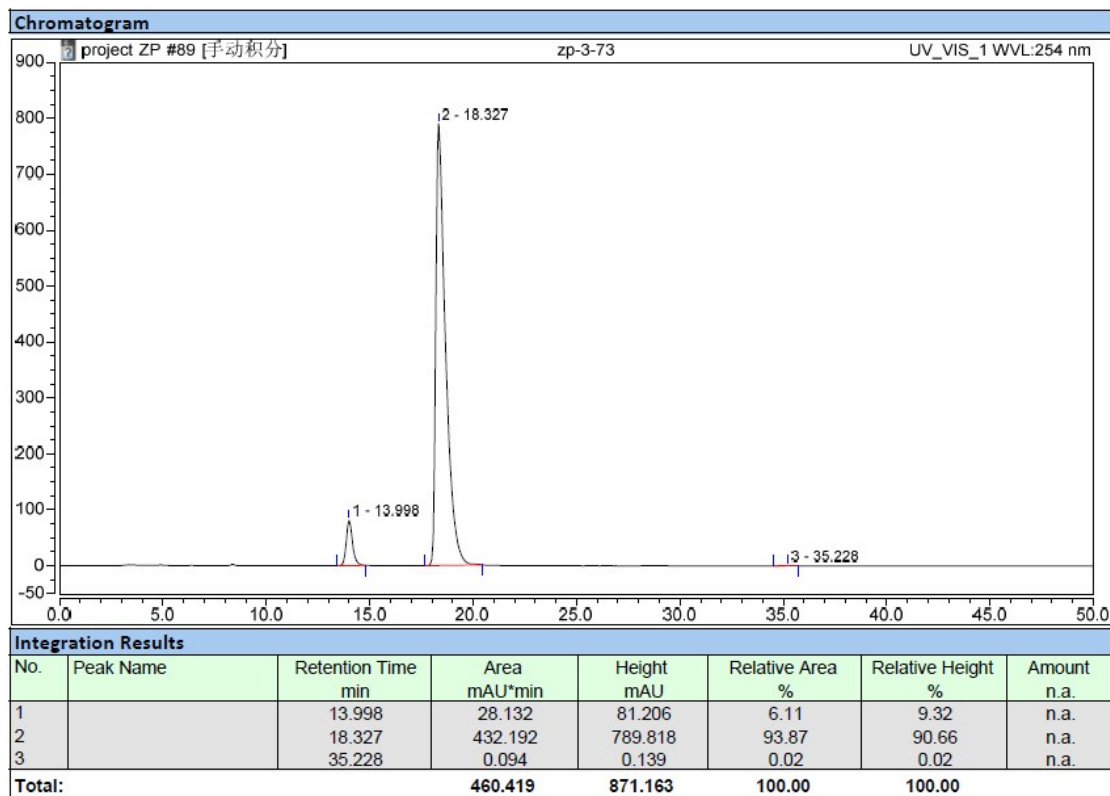

## Compound 3pa

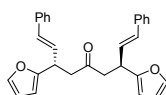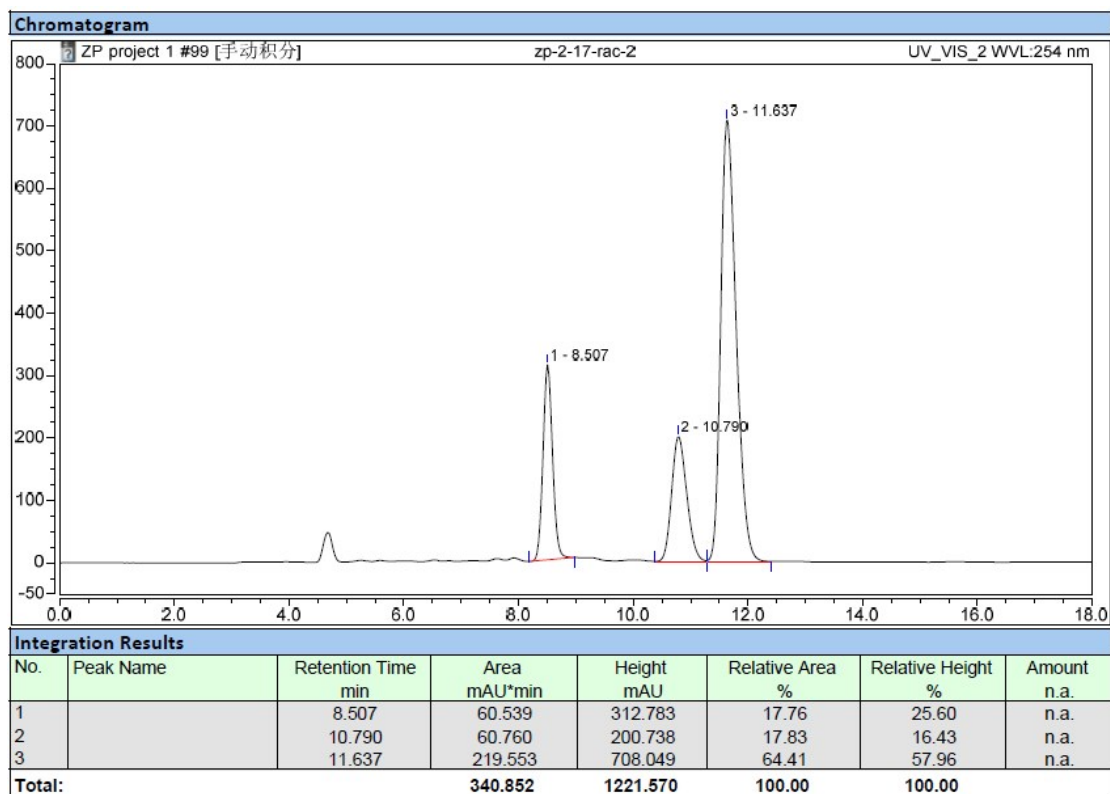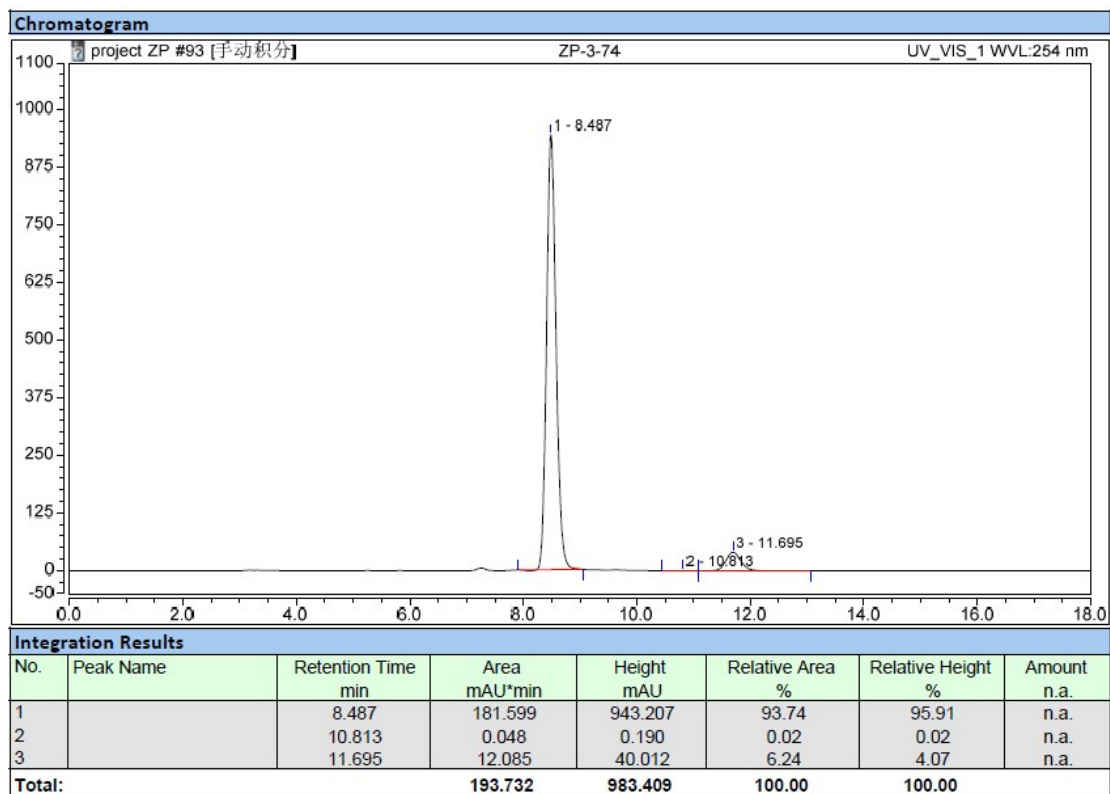

## Compound 3qa

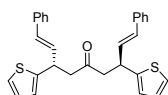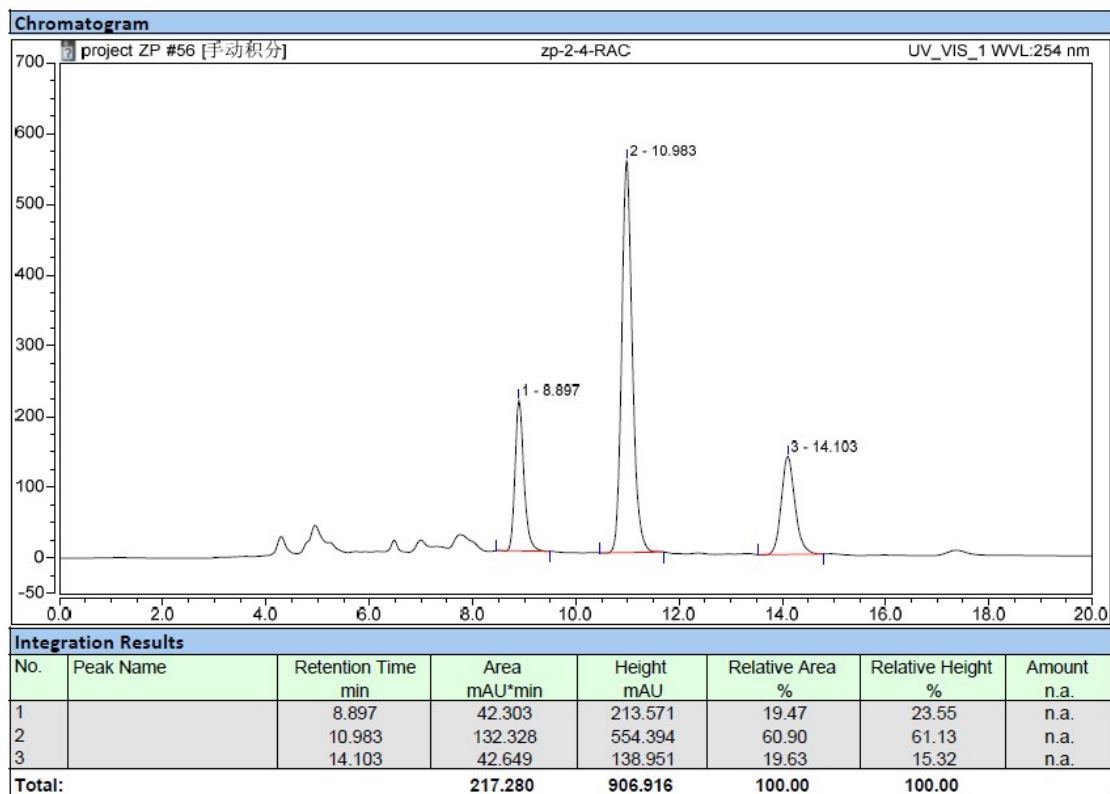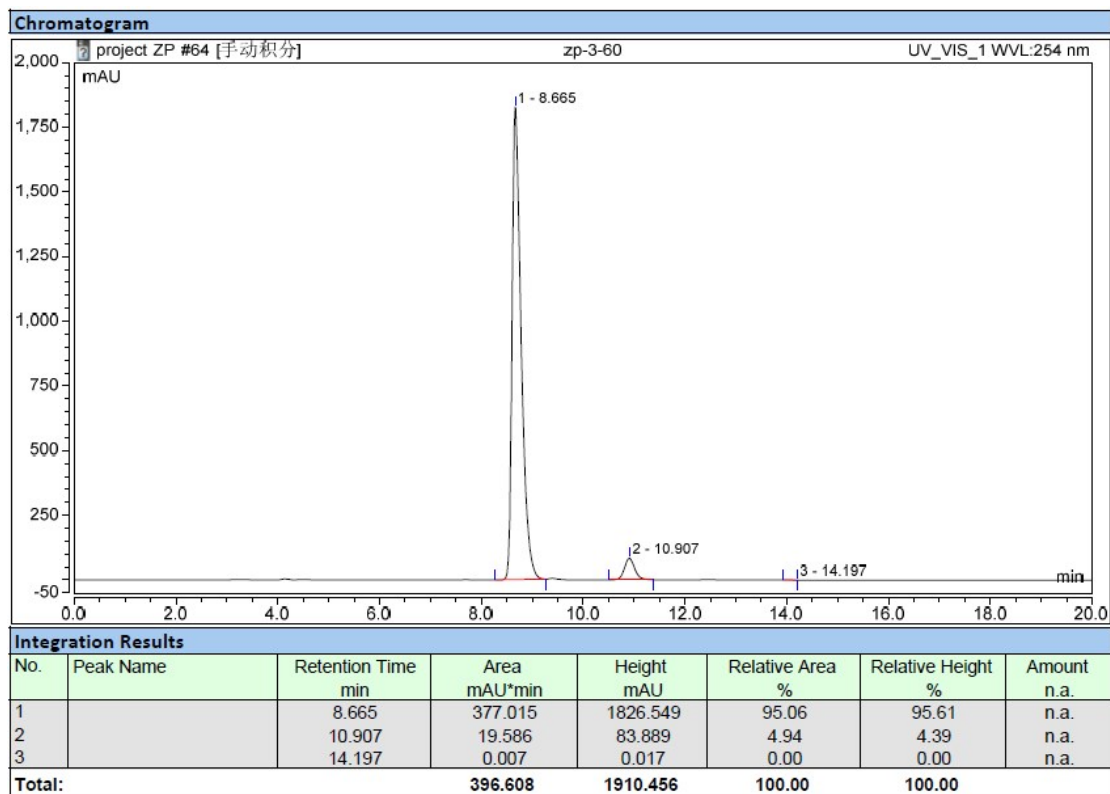

### Compound 3aa'(using (S)-3,3'-(3,5-(CF<sub>3</sub>)<sub>2</sub>-C<sub>6</sub>H<sub>3</sub>)<sub>2</sub>-BINOL)

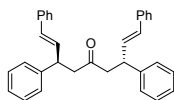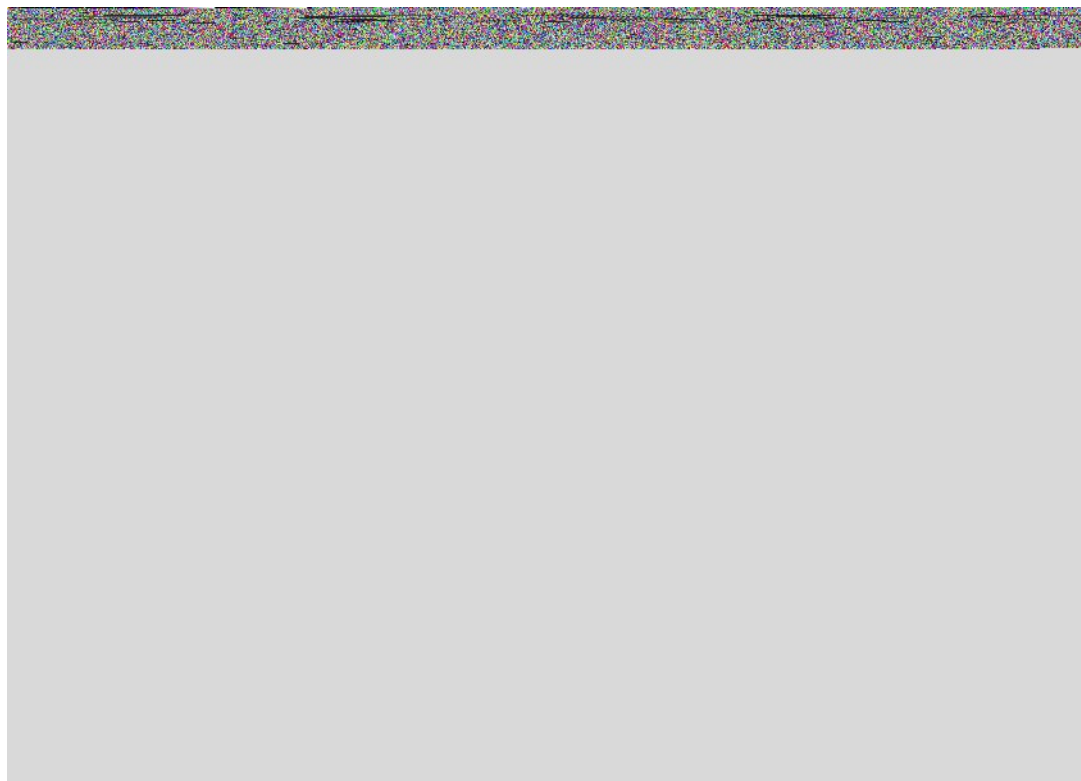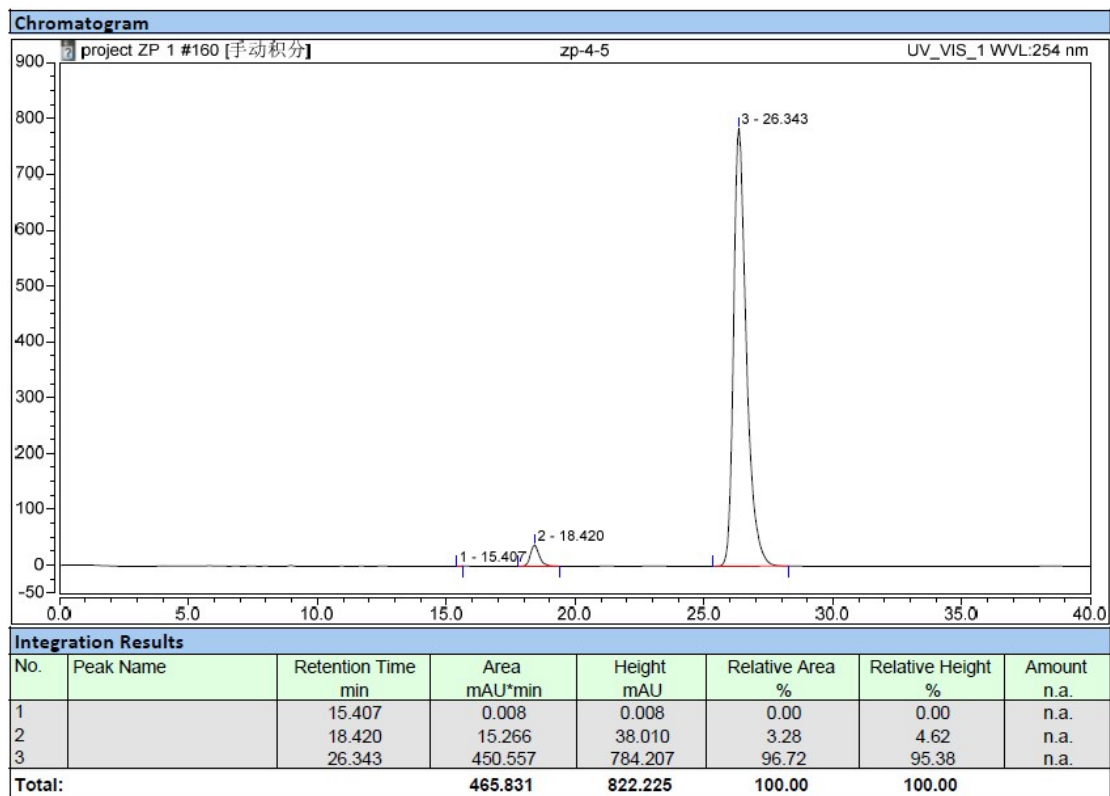

## Compound 3ra

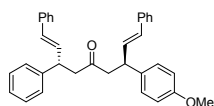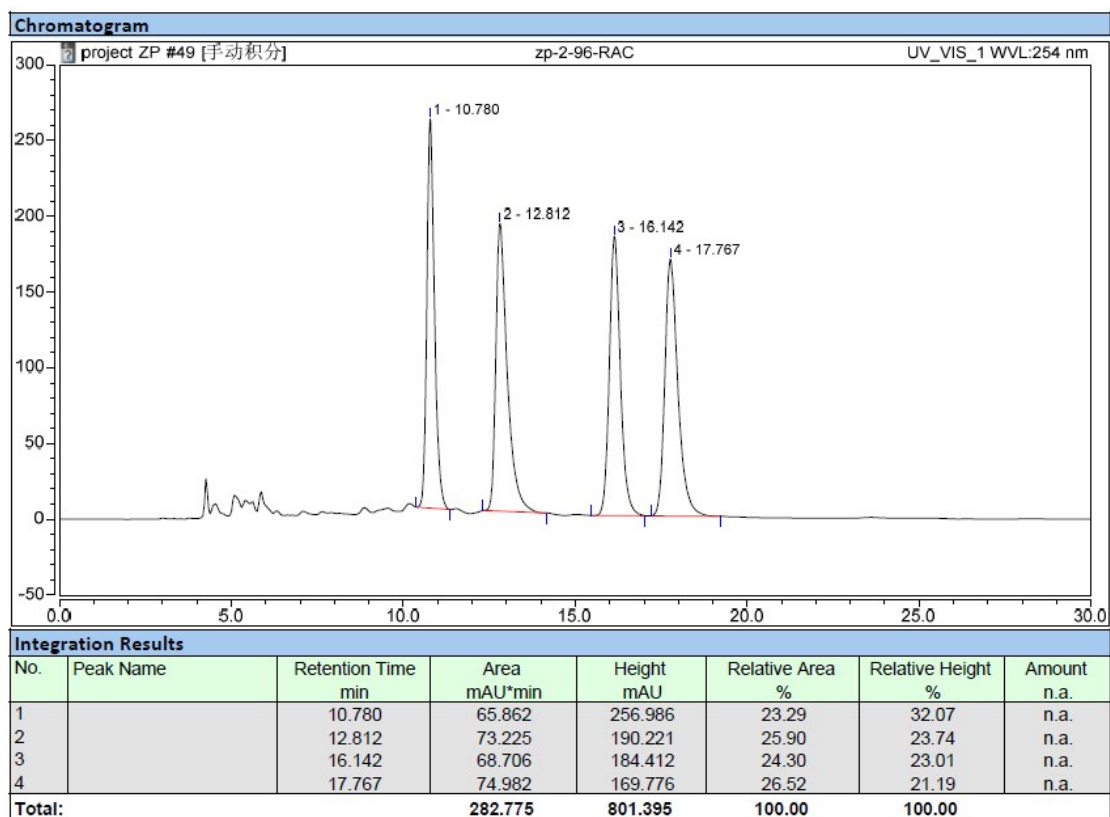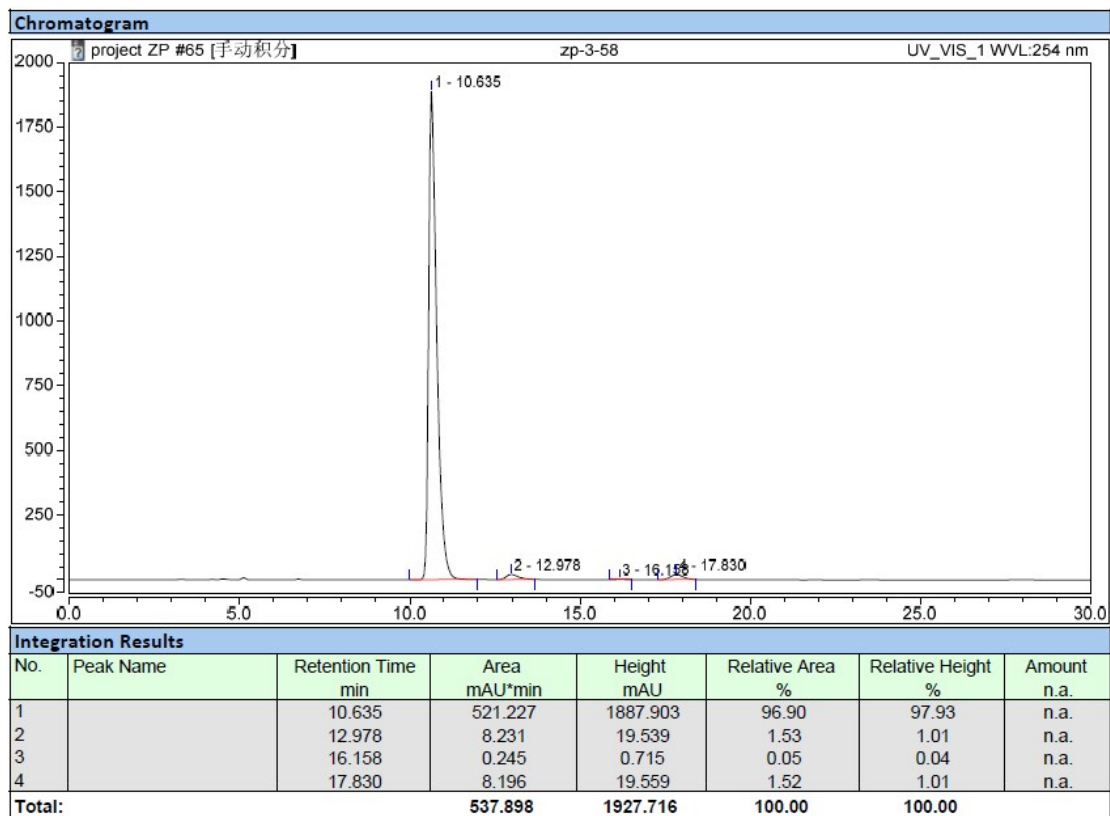



# Compound 3sa

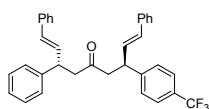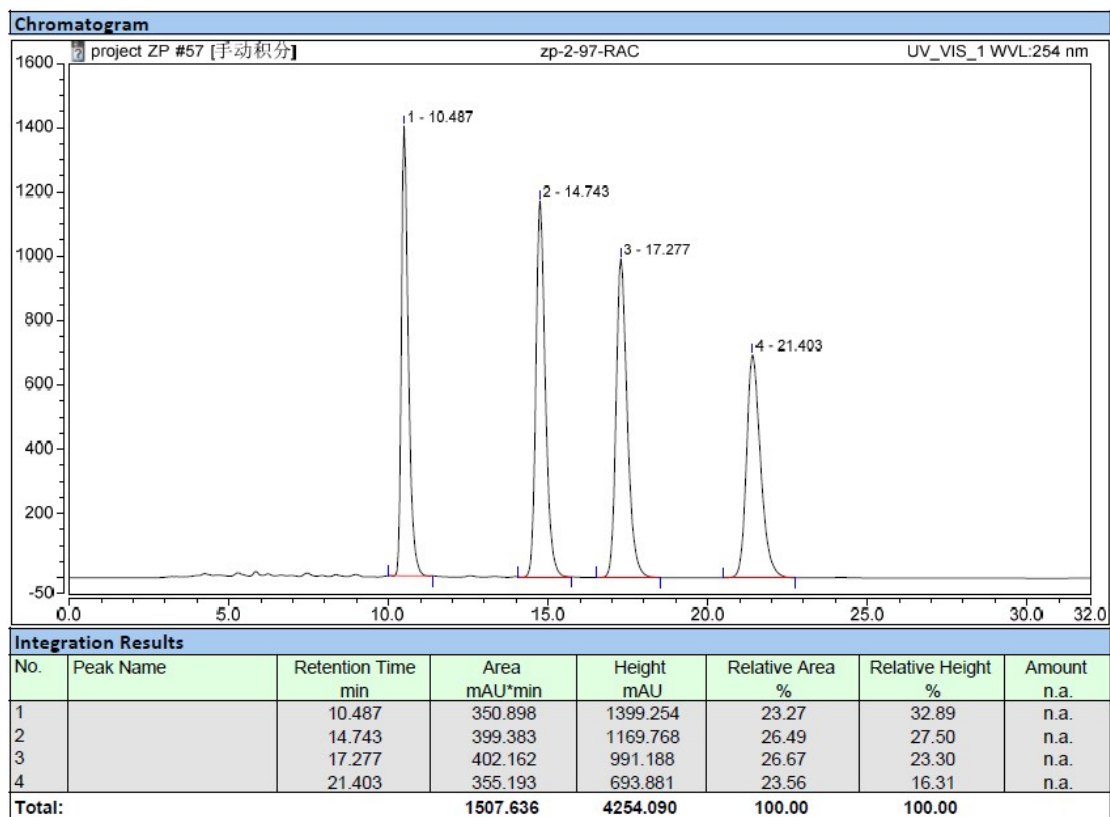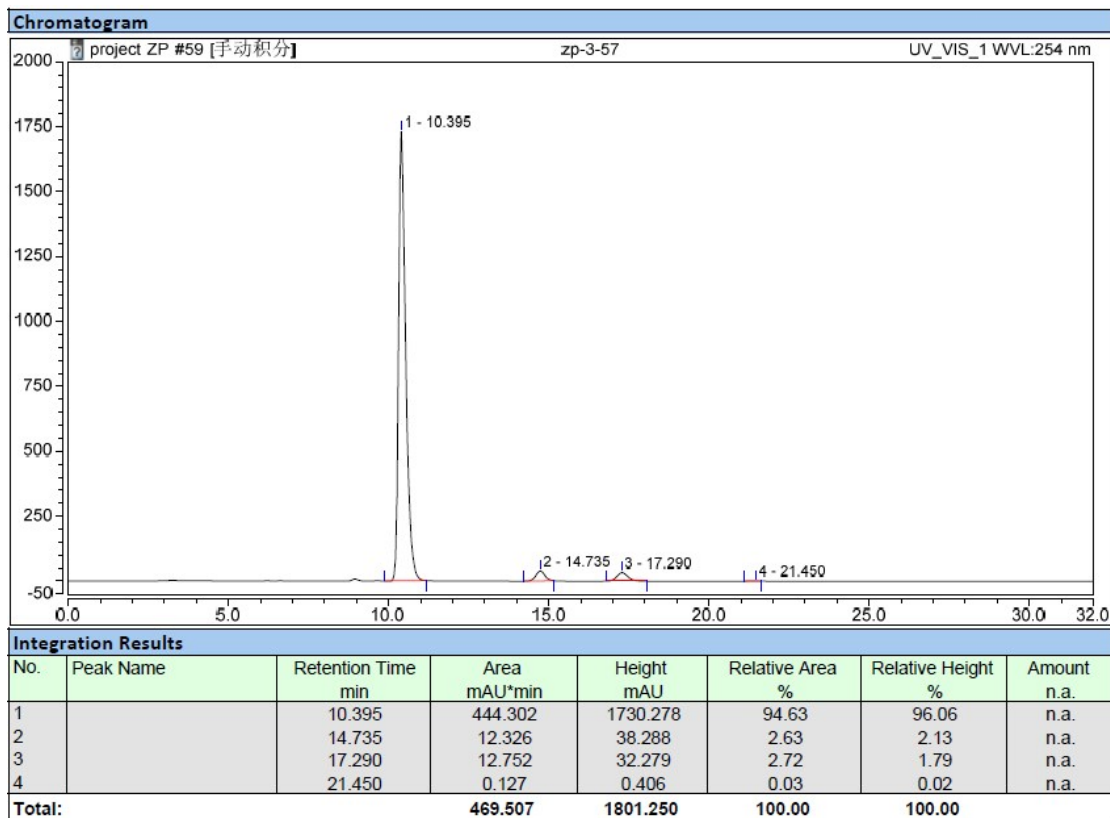

# Compound 3ta

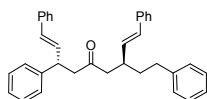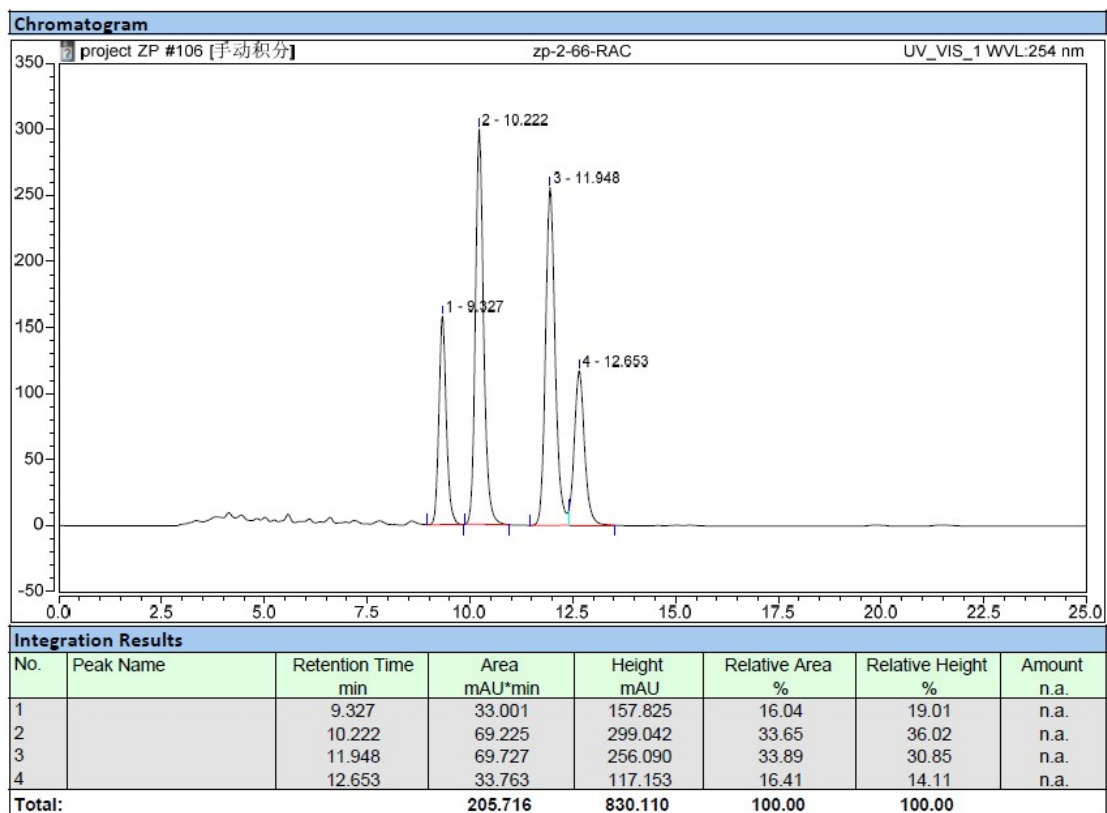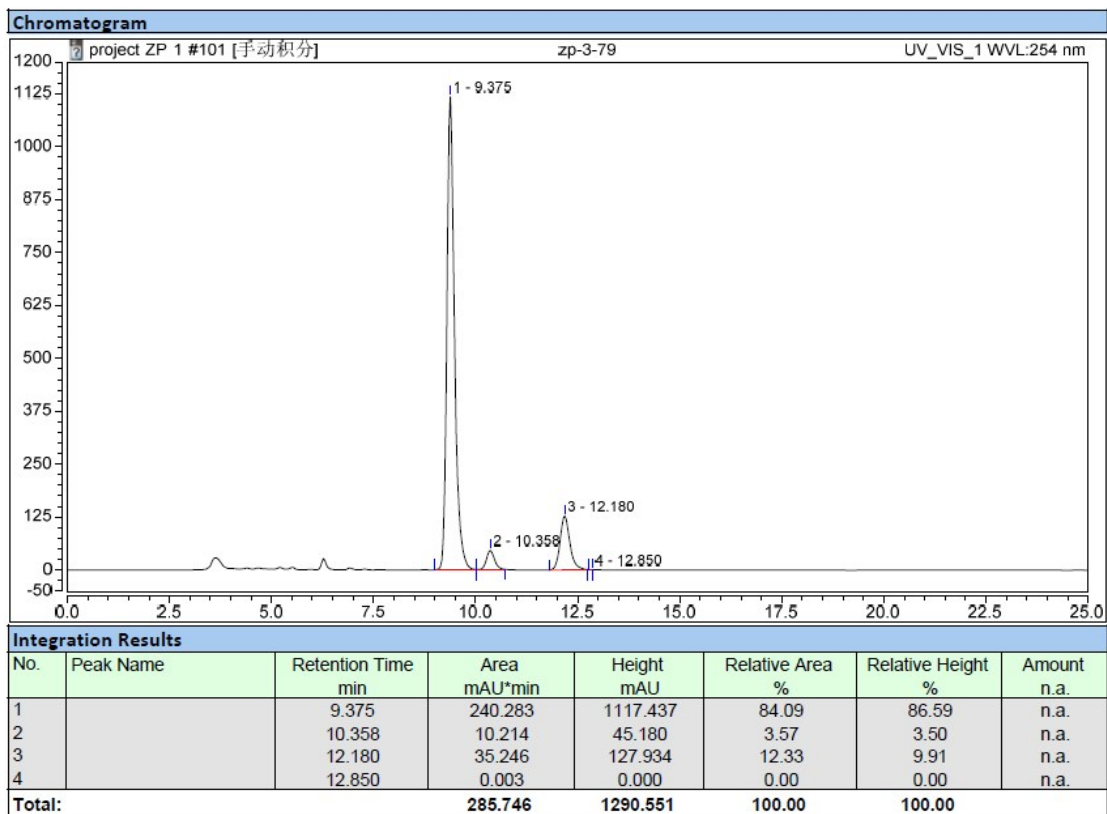

# Compound 3ua

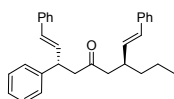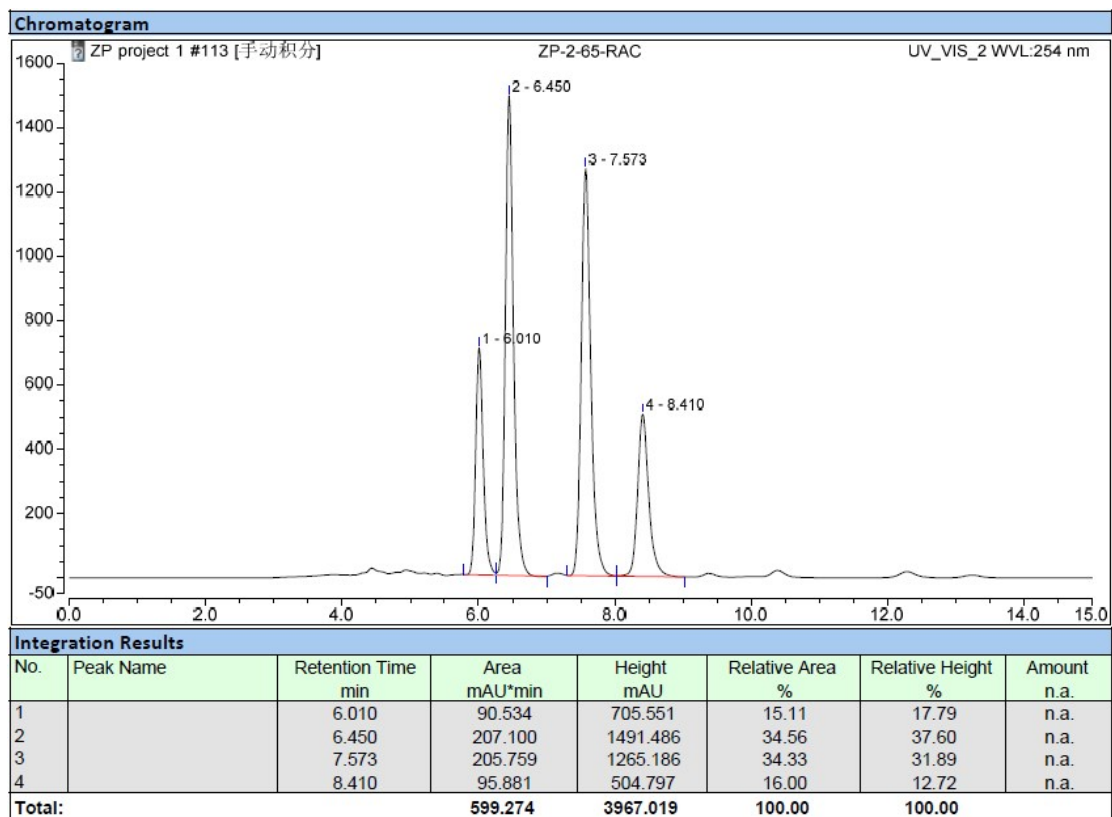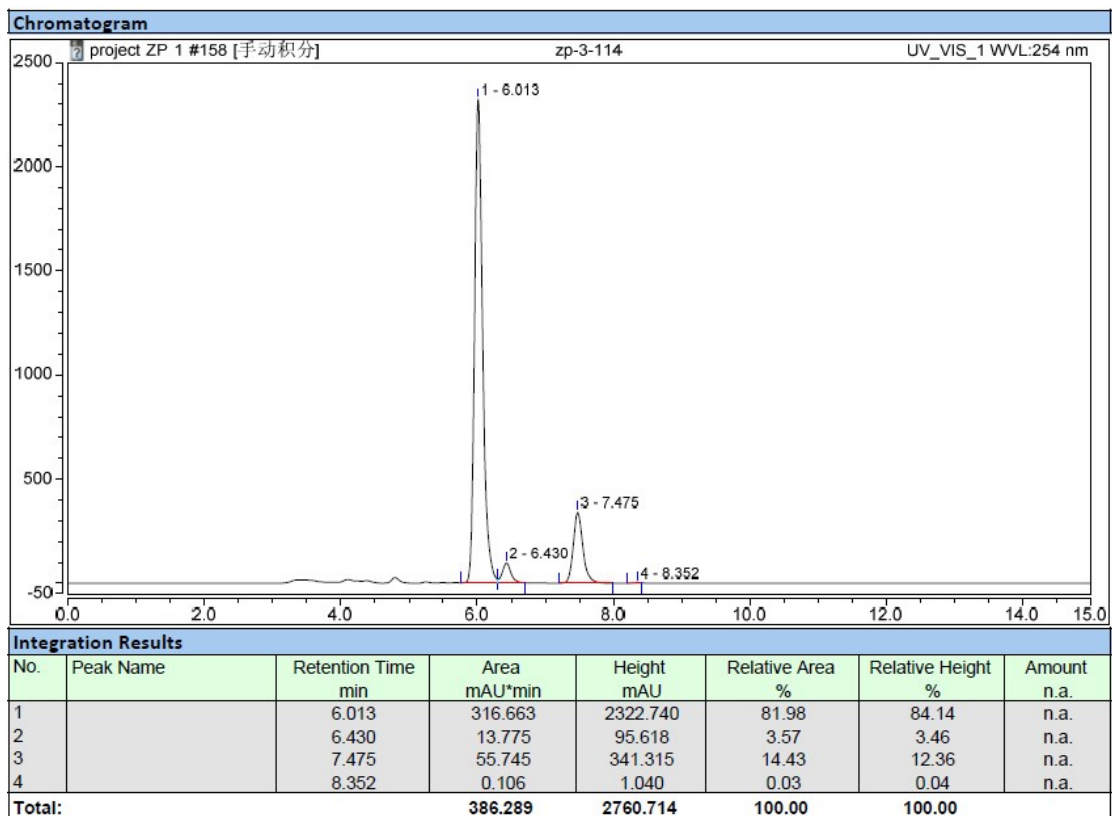

## Compound 3ab

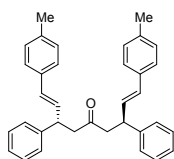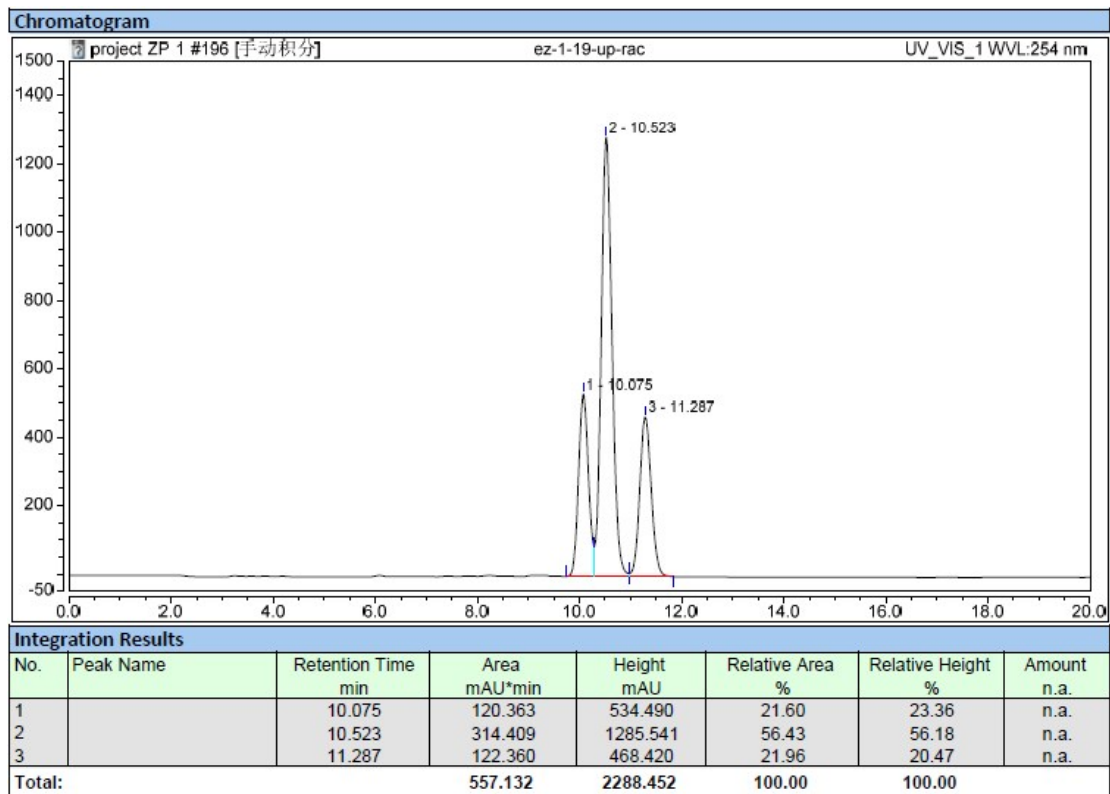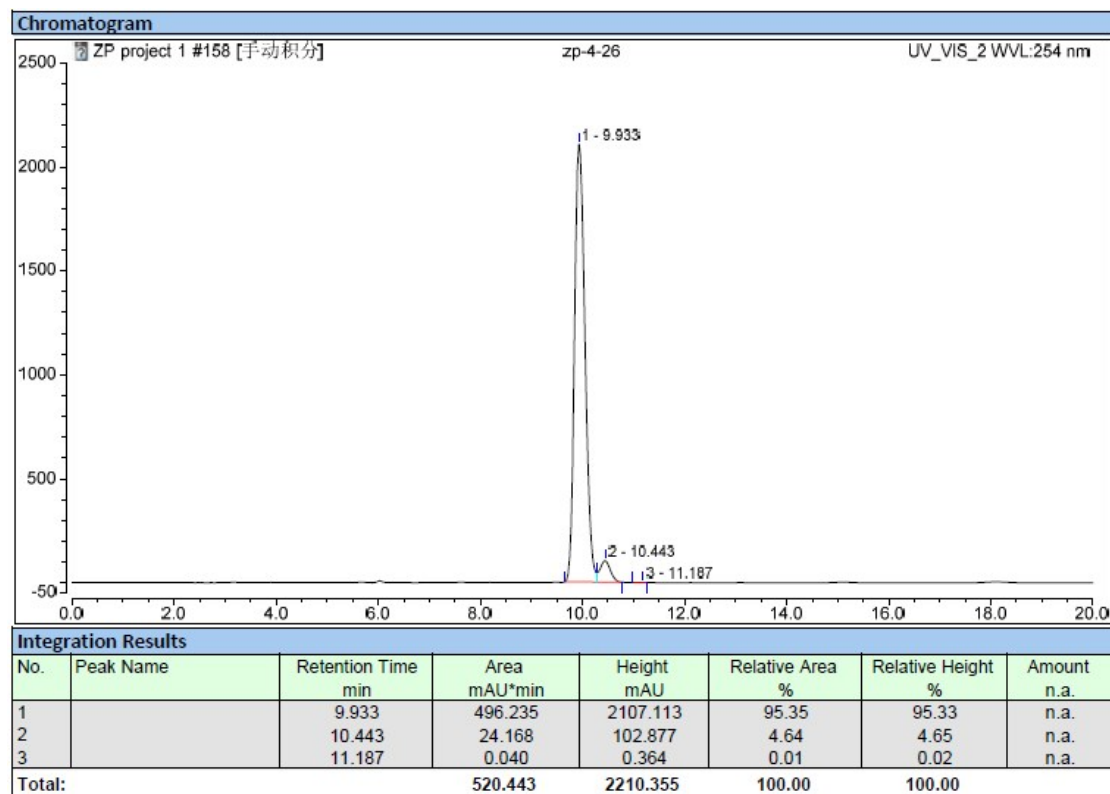

## Compound 4ac

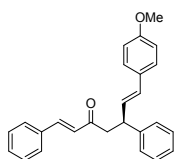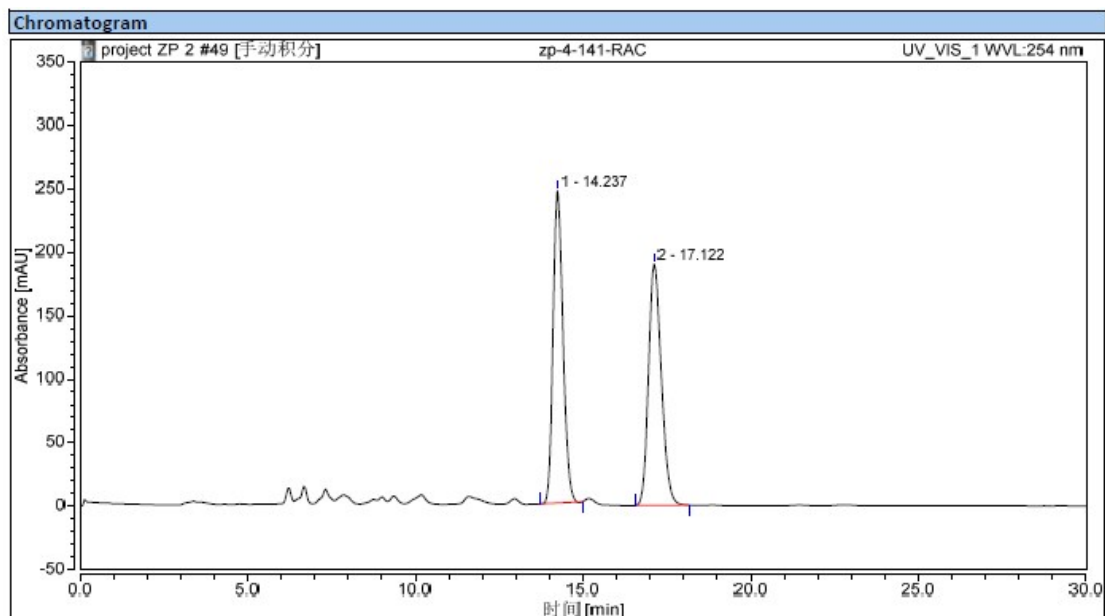

**Integration Results**

| No.           | Peak Name | Retention Time<br>min | Area<br>mAU*min | Height<br>mAU  | Relative Area<br>% | Relative Height<br>% | Amount<br>n.a. |
|---------------|-----------|-----------------------|-----------------|----------------|--------------------|----------------------|----------------|
| 1             |           | 14.237                | 84.199          | 246.089        | 50.04              | 56.39                | n.a.           |
| 2             |           | 17.122                | 84.069          | 190.296        | 49.96              | 43.61                | n.a.           |
| <b>Total:</b> |           |                       | <b>168.268</b>  | <b>436.385</b> | <b>100.00</b>      | <b>100.00</b>        |                |

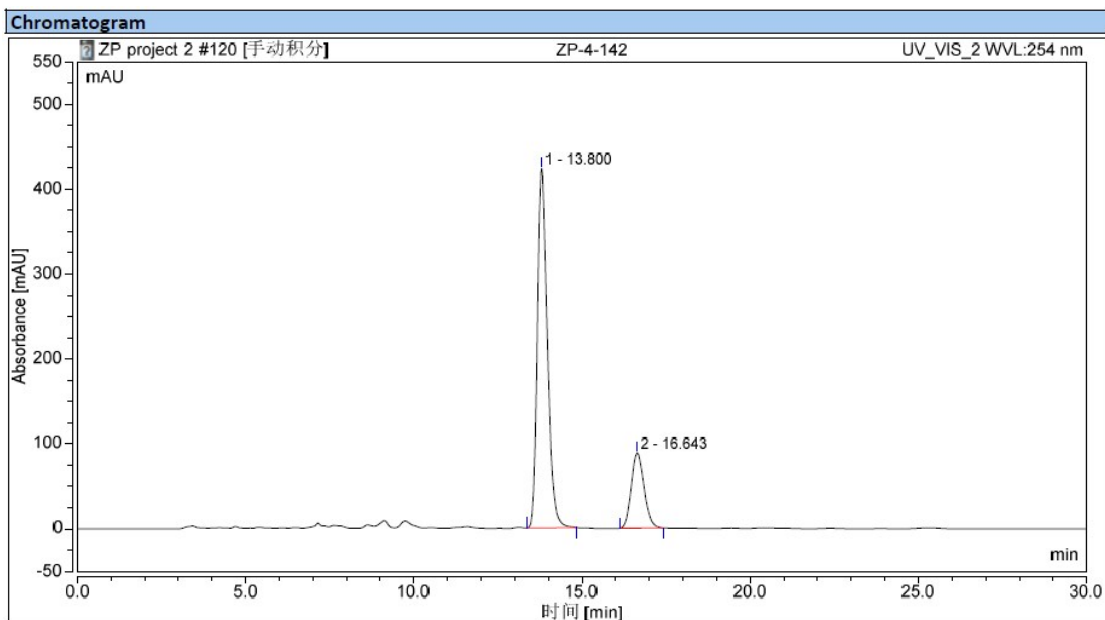

**Integration Results**

| No.           | Peak Name | Retention Time<br>min | Area<br>mAU*min | Height<br>mAU  | Relative Area<br>% | Relative Height<br>% | Amount<br>n.a. |
|---------------|-----------|-----------------------|-----------------|----------------|--------------------|----------------------|----------------|
| 1             |           | 13.800                | 145.774         | 423.370        | 78.89              | 82.65                | n.a.           |
| 2             |           | 16.643                | 38.996          | 88.866         | 21.11              | 17.35                | n.a.           |
| <b>Total:</b> |           |                       | <b>184.770</b>  | <b>512.236</b> | <b>100.00</b>      | <b>100.00</b>        |                |

## Compound 3ad

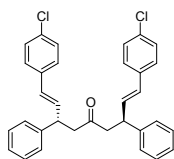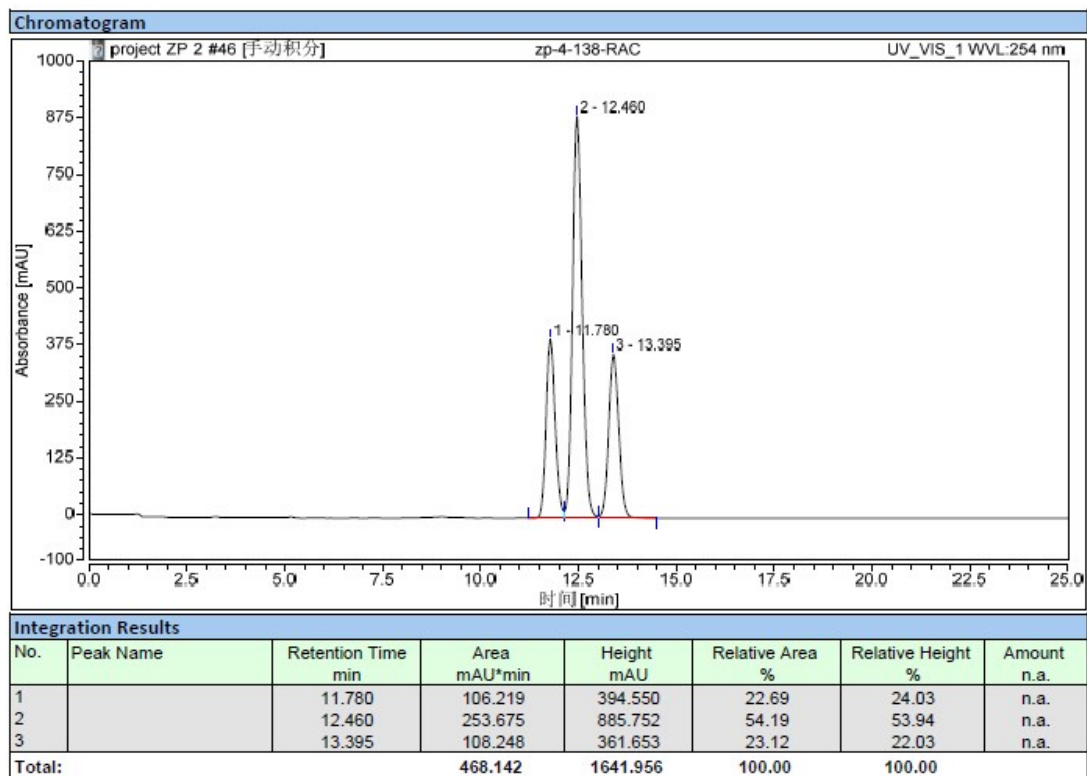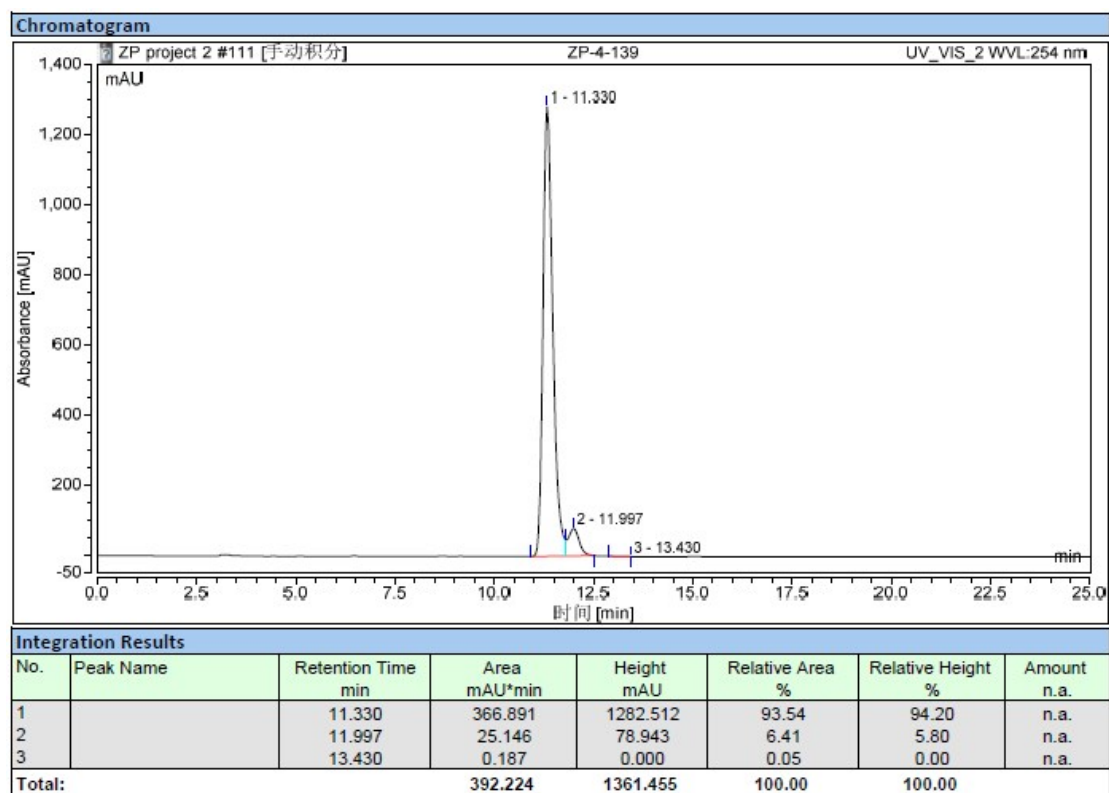

## Compound 3lb

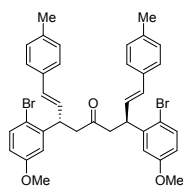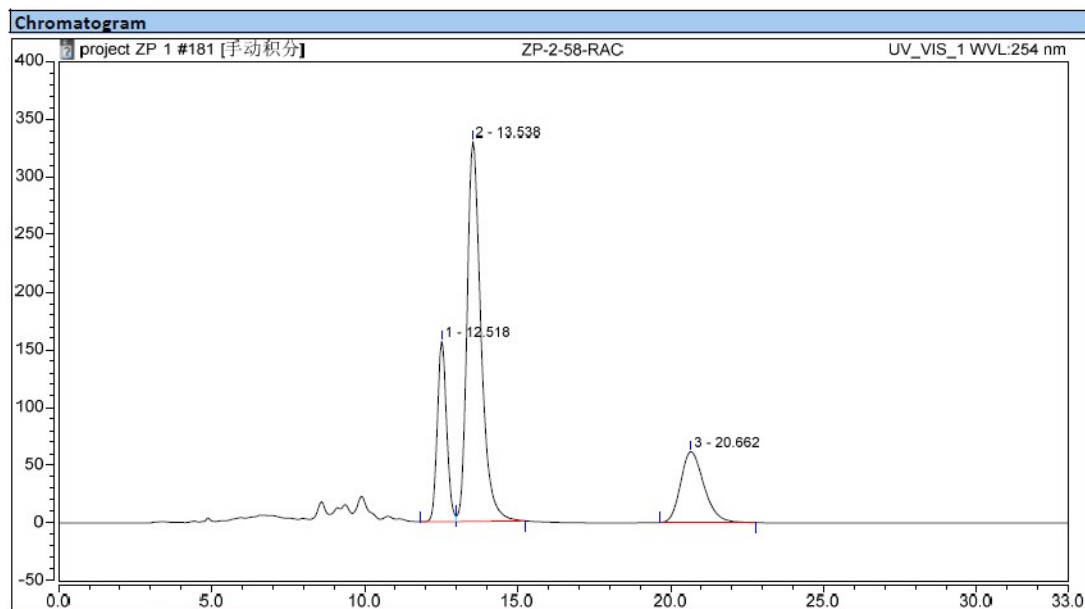

**Integration Results**

| No.           | Peak Name | Retention Time min | Area mAU*min   | Height mAU     | Relative Area % | Relative Height % | Amount |
|---------------|-----------|--------------------|----------------|----------------|-----------------|-------------------|--------|
| 1             |           | 12.518             | 55.334         | 156.224        | 19.58           | 28.57             | n.a.   |
| 2             |           | 13.538             | 173.117        | 329.234        | 61.24           | 60.21             | n.a.   |
| 3             |           | 20.662             | 54.218         | 61.396         | 19.18           | 11.23             | n.a.   |
| <b>Total:</b> |           |                    | <b>282.669</b> | <b>546.854</b> | <b>100.00</b>   | <b>100.00</b>     |        |

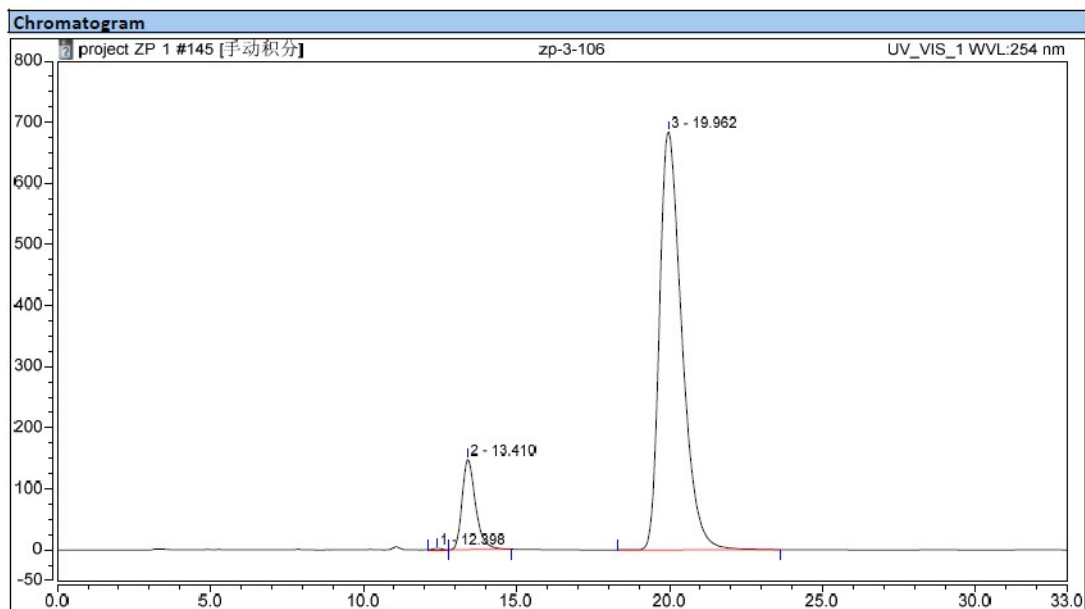

**Integration Results**

| No.           | Peak Name | Retention Time min | Area mAU*min   | Height mAU     | Relative Area % | Relative Height % | Amount |
|---------------|-----------|--------------------|----------------|----------------|-----------------|-------------------|--------|
| 1             |           | 12.398             | 0.698          | 2.217          | 0.11            | 0.27              | n.a.   |
| 2             |           | 13.410             | 75.003         | 147.730        | 11.45           | 17.69             | n.a.   |
| 3             |           | 19.962             | 579.249        | 685.064        | 88.44           | 82.04             | n.a.   |
| <b>Total:</b> |           |                    | <b>654.950</b> | <b>835.011</b> | <b>100.00</b>   | <b>100.00</b>     |        |

## Compound 3le

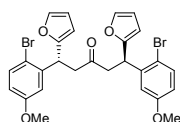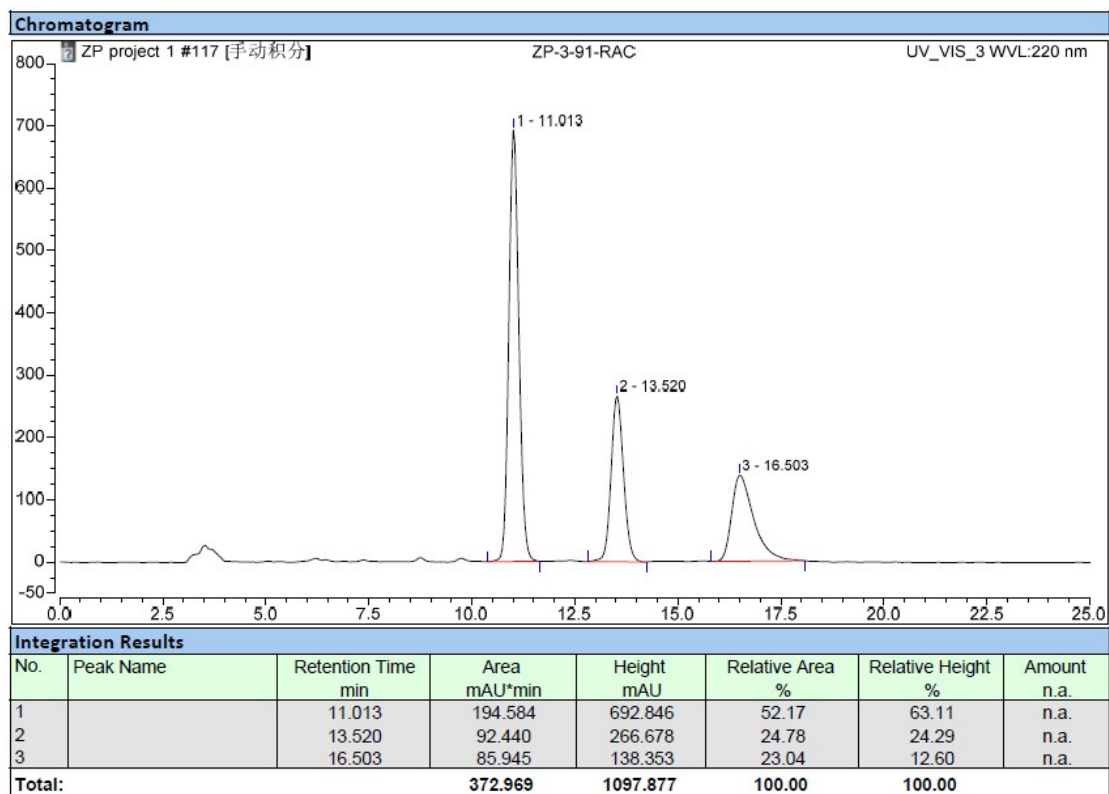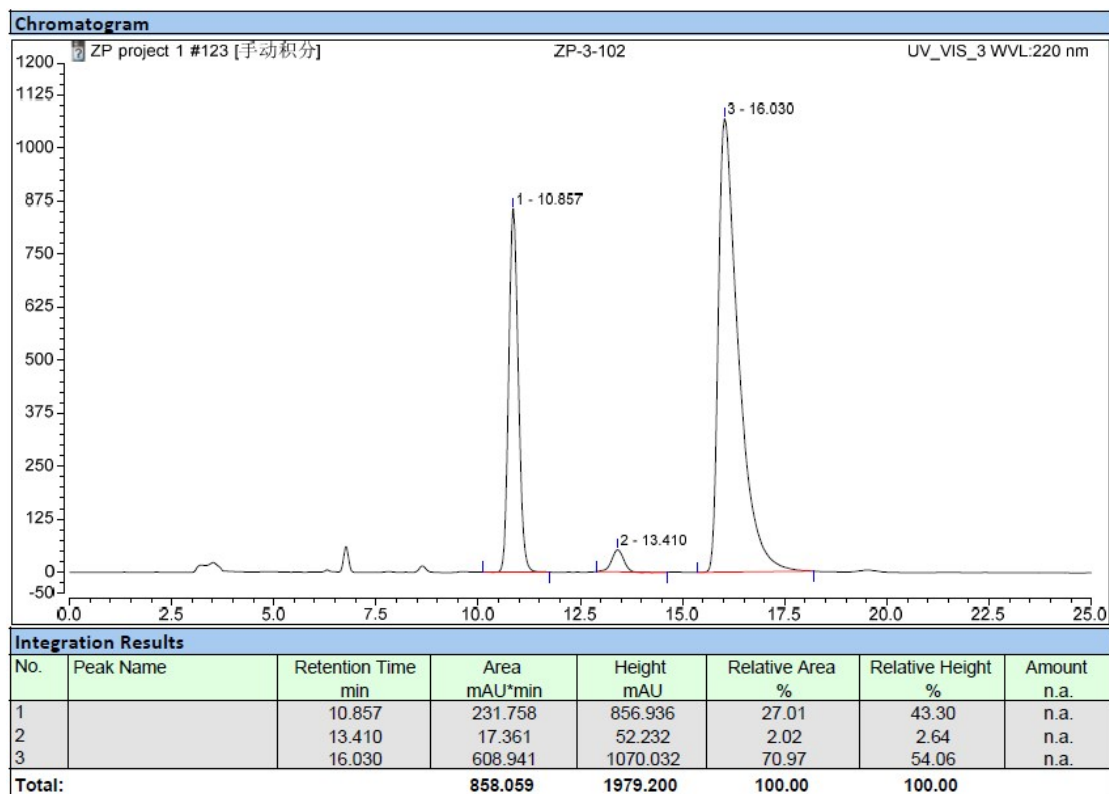



## Compound 3lf

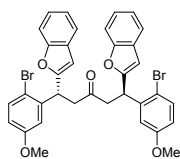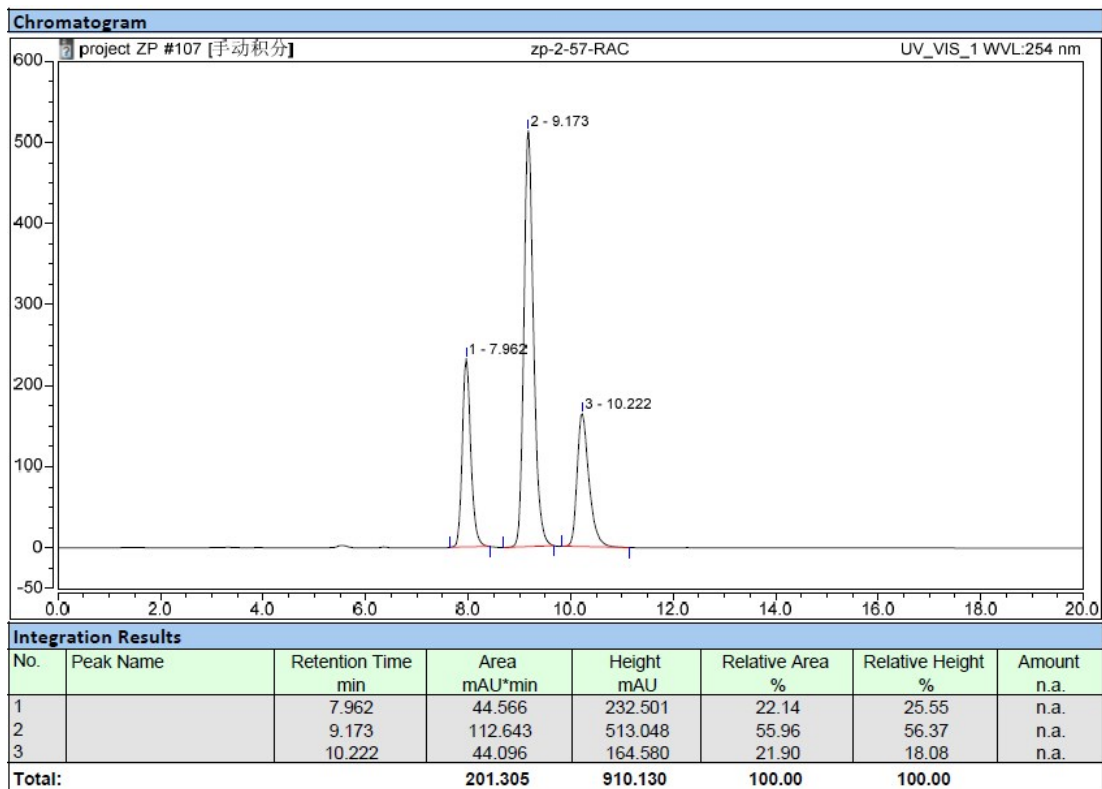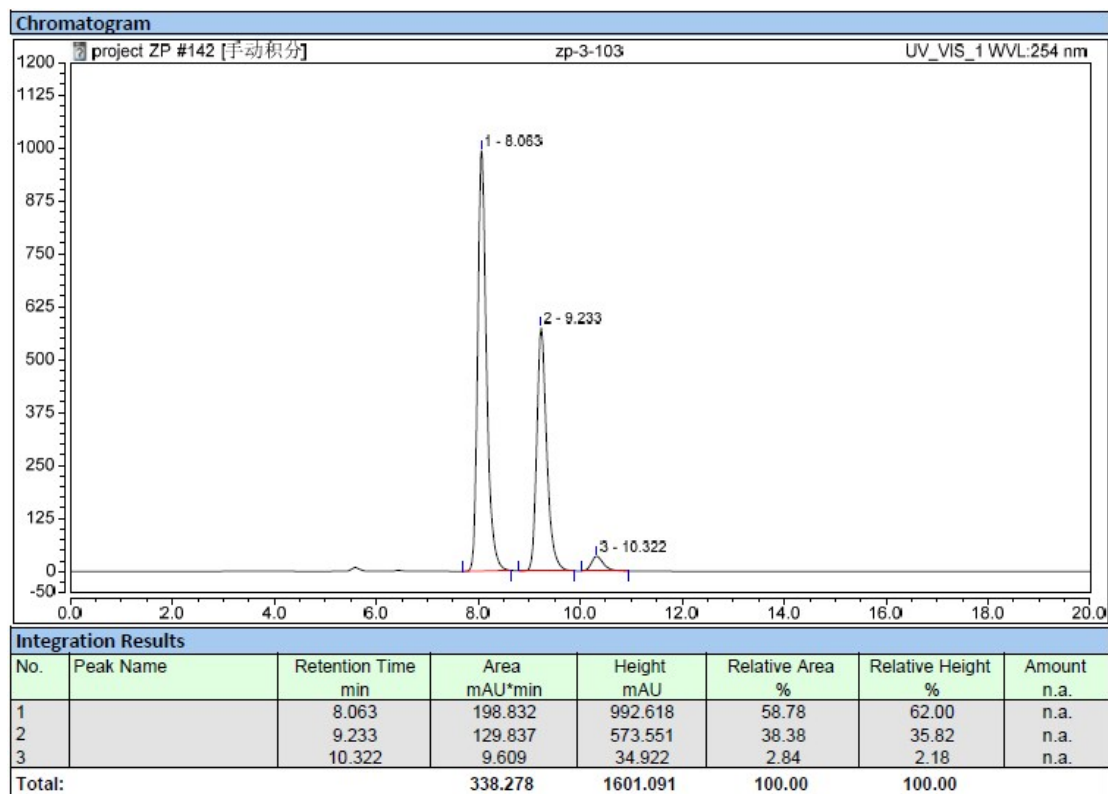

## Compound 4lg

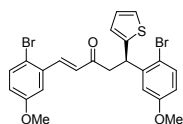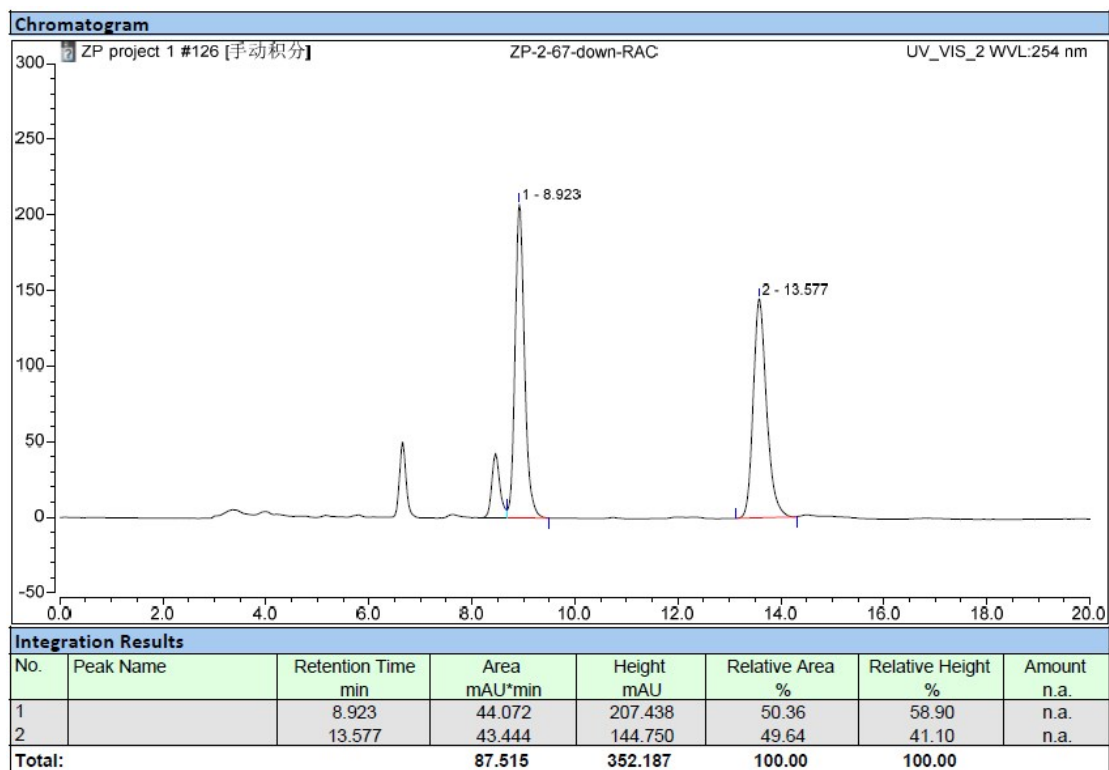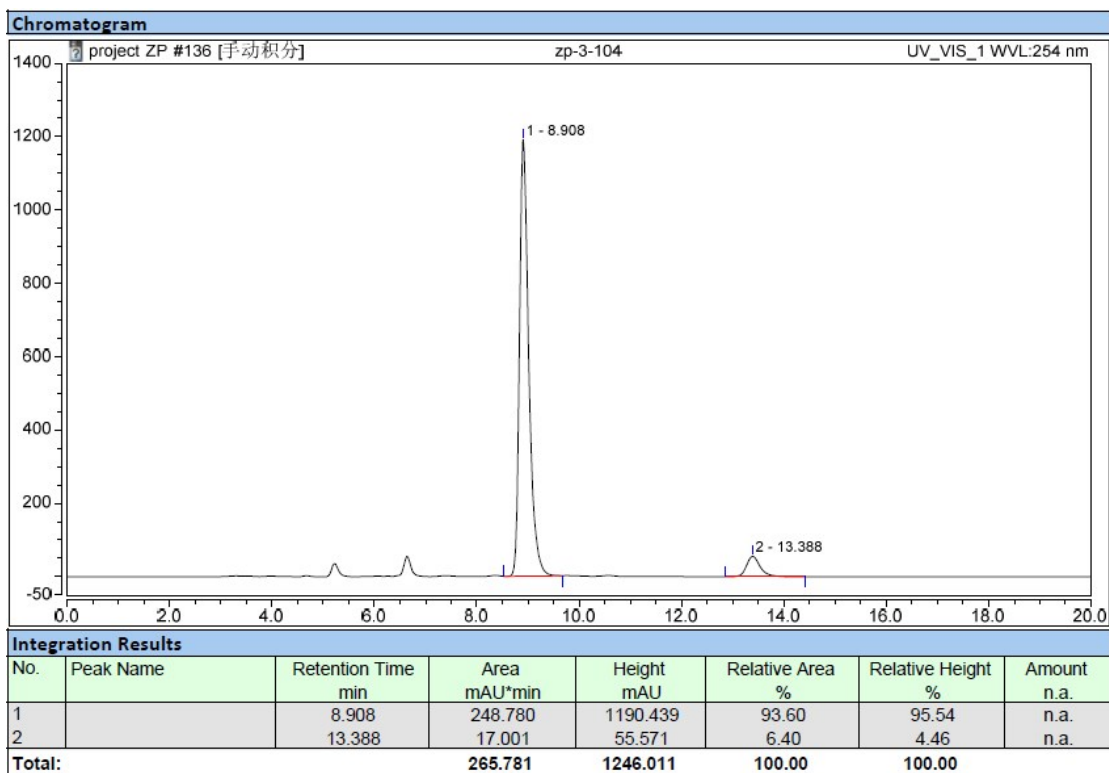

## Compound 4h

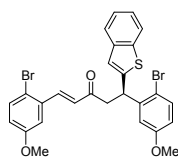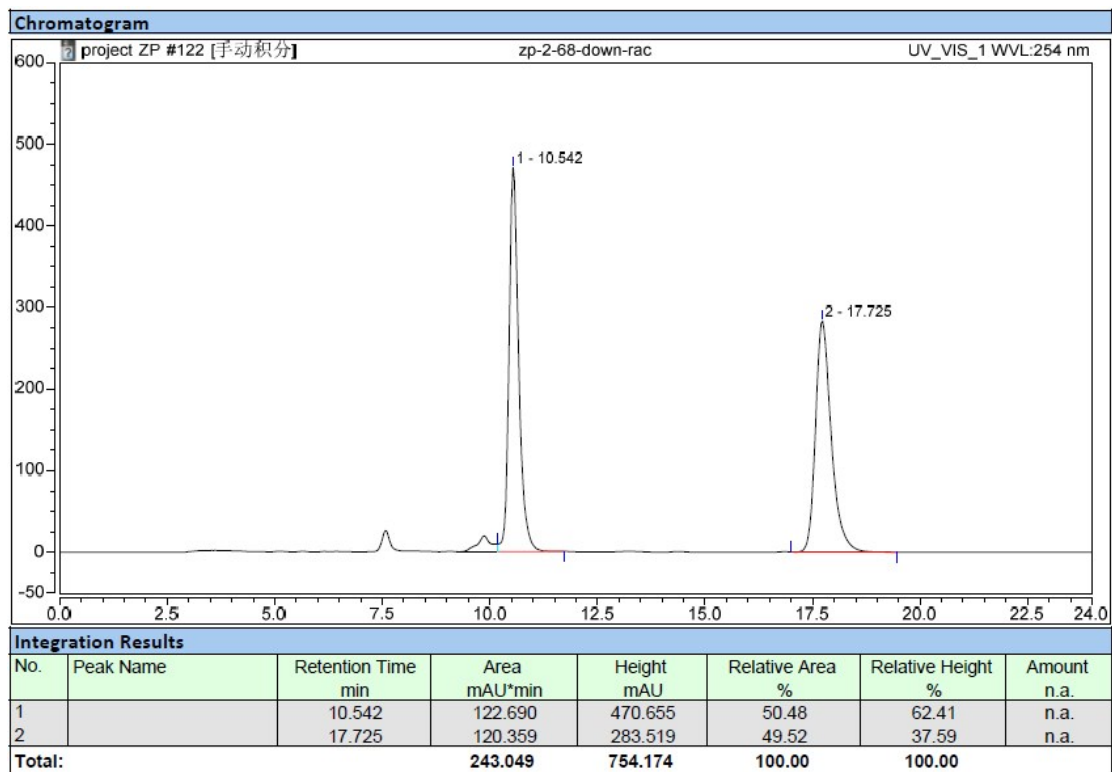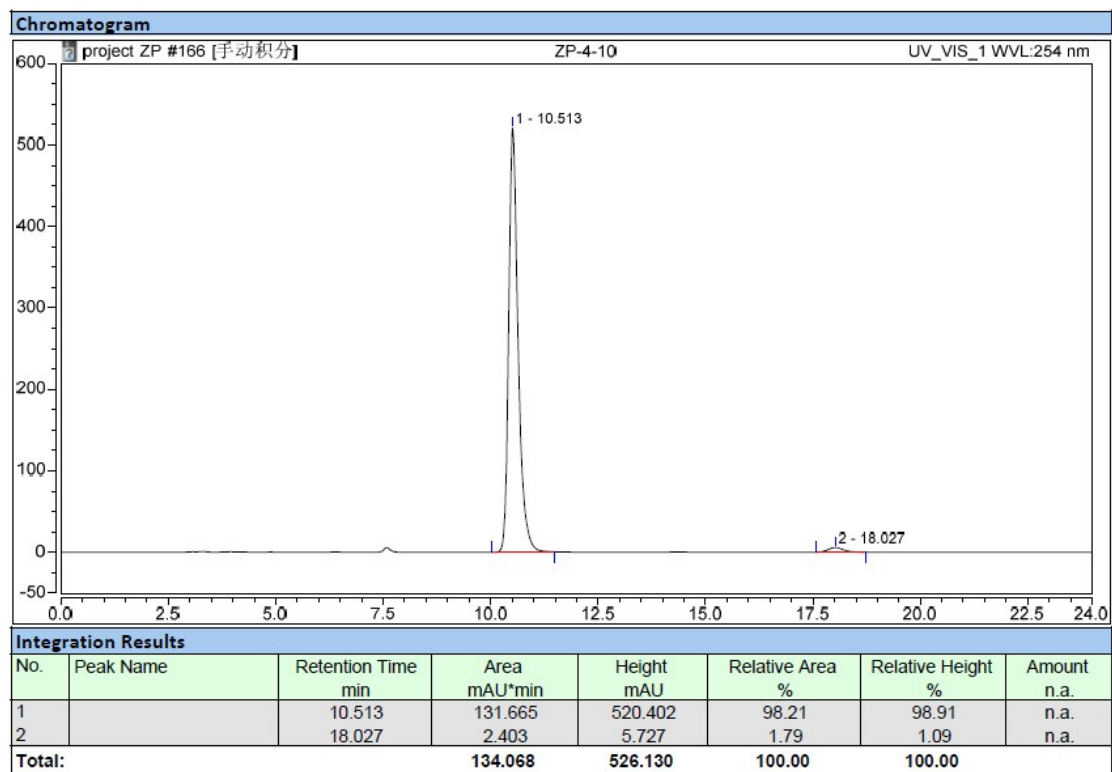

# Compound 4ai

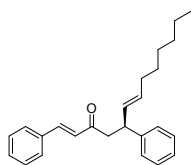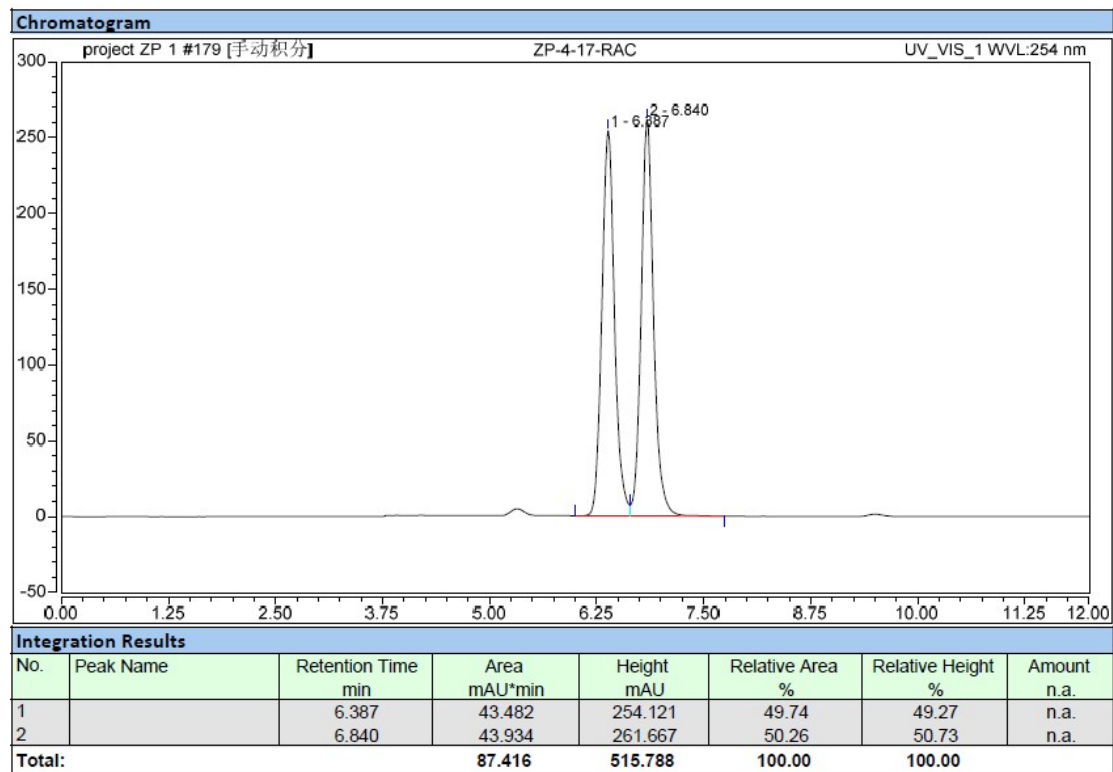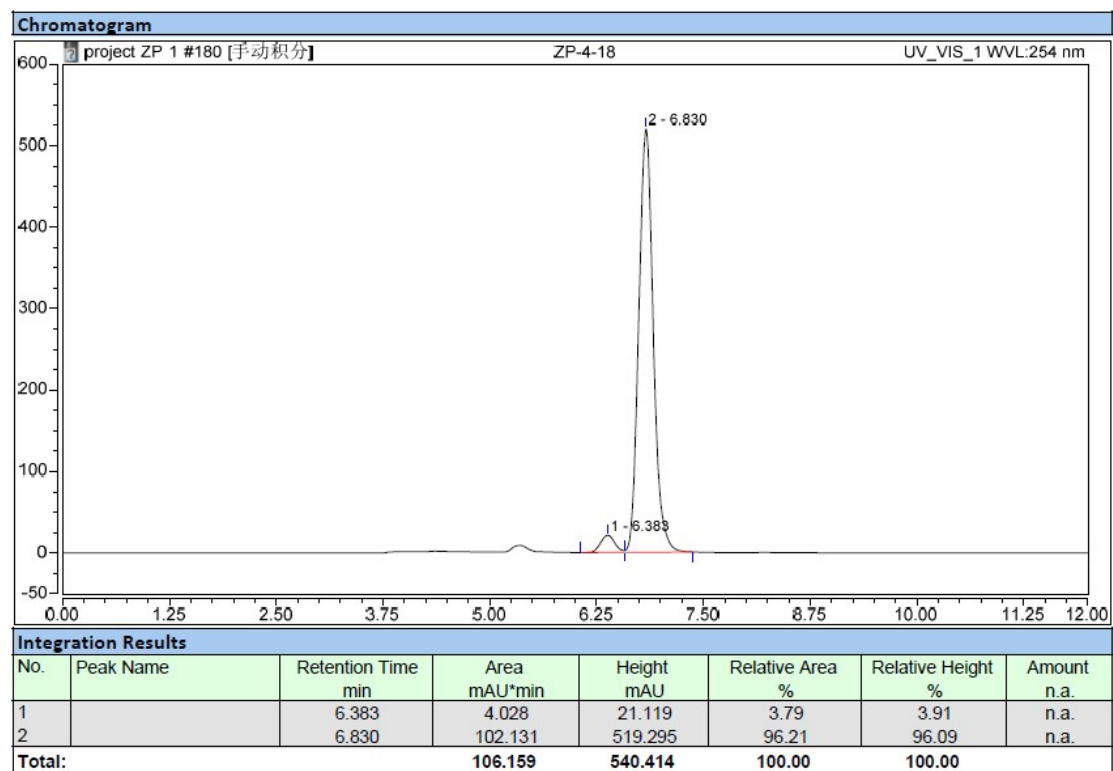

## Compound 3aa'

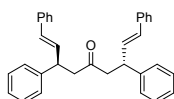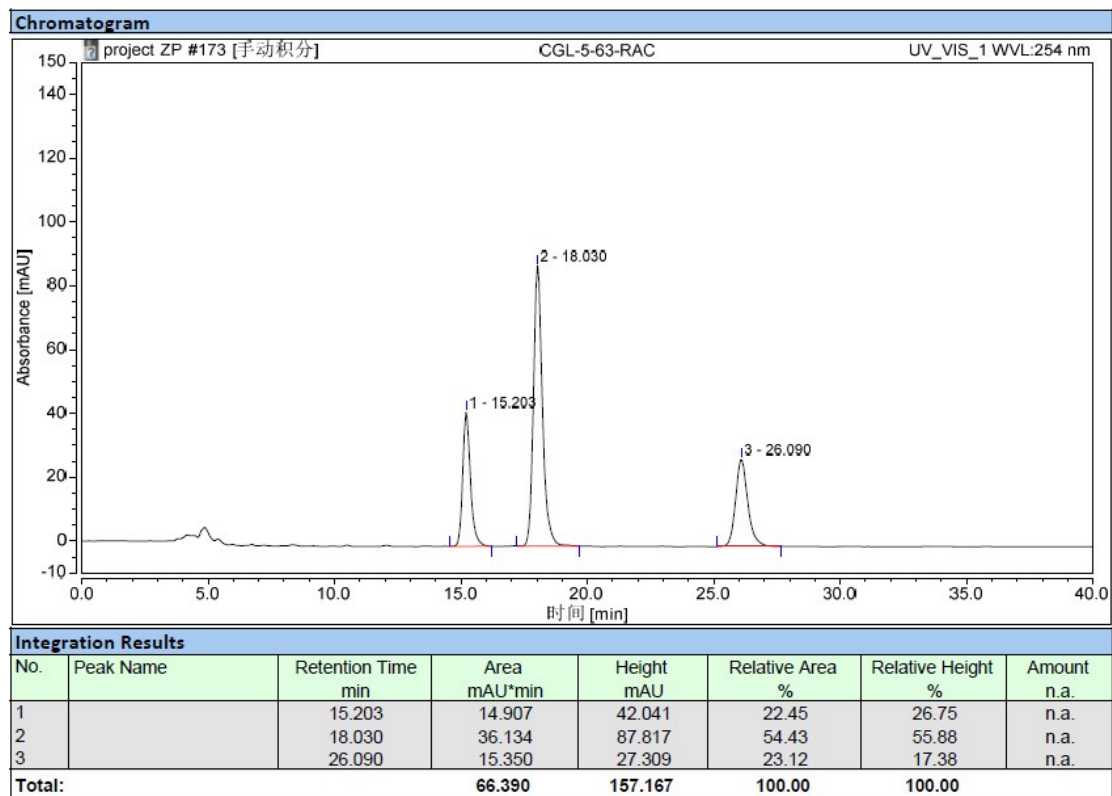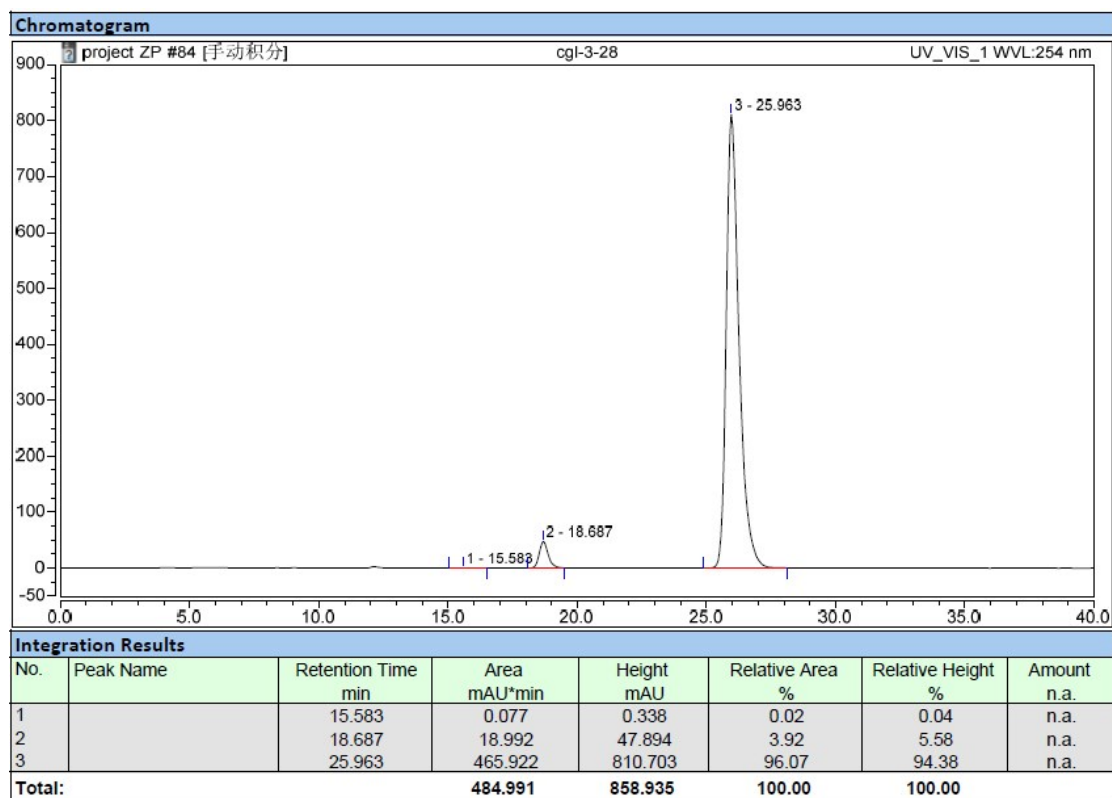

## Compound 3ea'

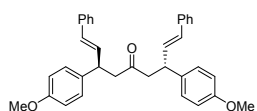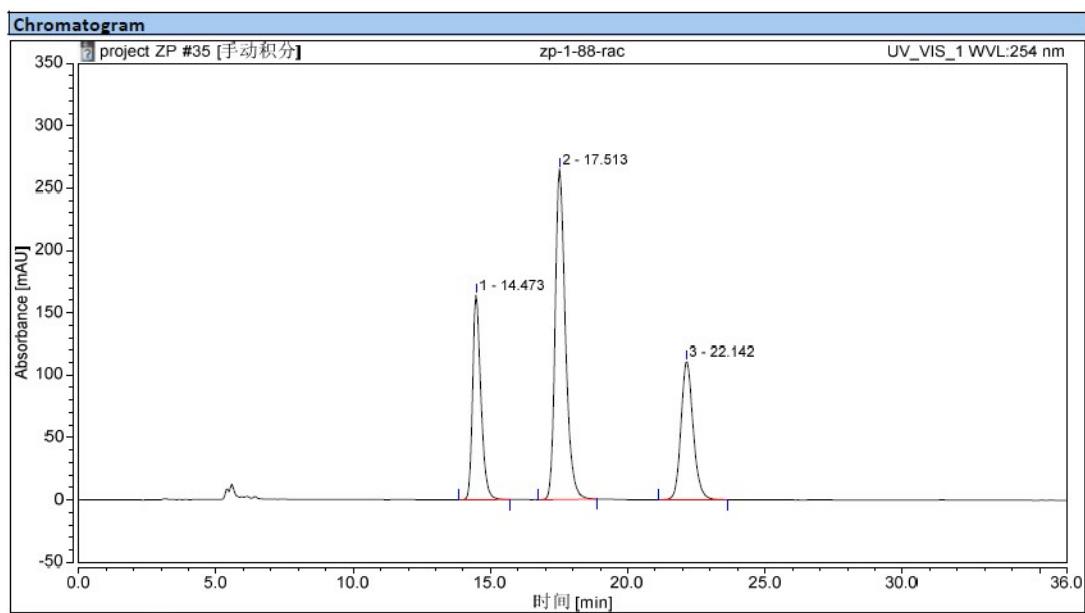

**Integration Results**

| No.           | Peak Name | Retention Time<br>min | Area<br>mAU*min | Height<br>mAU  | Relative Area<br>% | Relative Height<br>% | Amount<br>n.a. |
|---------------|-----------|-----------------------|-----------------|----------------|--------------------|----------------------|----------------|
| 1             |           | 14.473                | 57.393          | 164.433        | 25.03              | 30.38                | n.a.           |
| 2             |           | 17.513                | 114.775         | 265.375        | 50.05              | 49.03                | n.a.           |
| 3             |           | 22.142                | 57.144          | 111.409        | 24.92              | 20.58                | n.a.           |
| <b>Total:</b> |           |                       | <b>229.312</b>  | <b>541.217</b> | <b>100.00</b>      | <b>100.00</b>        |                |

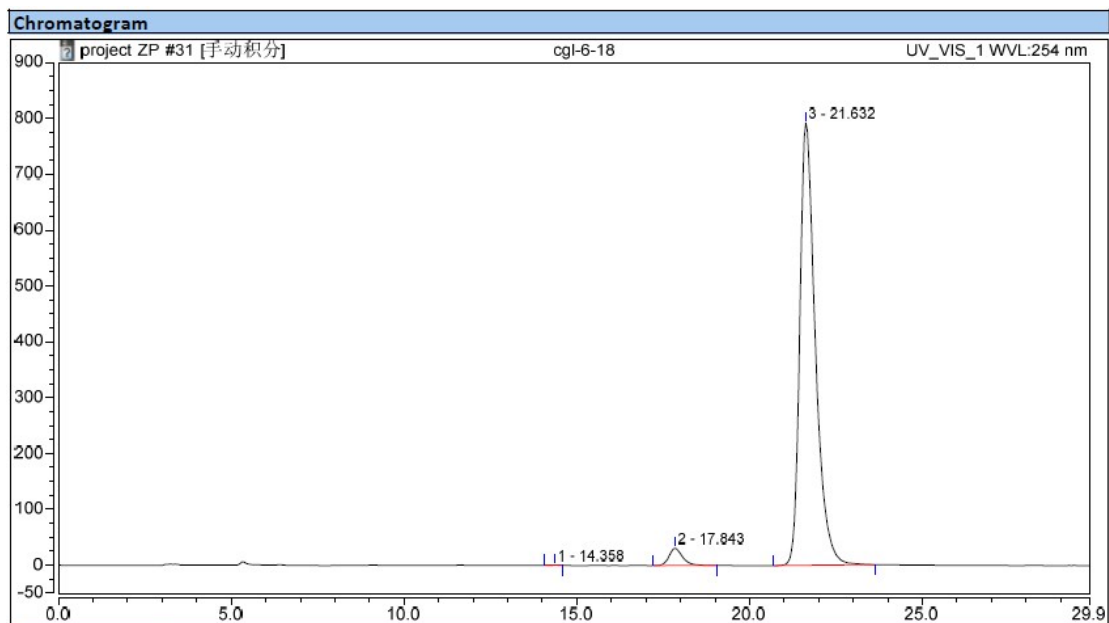

**Integration Results**

| No.           | Peak Name | Retention Time<br>min | Area<br>mAU*min | Height<br>mAU  | Relative Area<br>% | Relative Height<br>% | Amount<br>n.a. |
|---------------|-----------|-----------------------|-----------------|----------------|--------------------|----------------------|----------------|
| 1             |           | 14.358                | 0.083           | 0.282          | 0.02               | 0.03                 | n.a.           |
| 2             |           | 17.843                | 13.697          | 30.739         | 3.21               | 3.73                 | n.a.           |
| 3             |           | 21.632                | 413.360         | 792.357        | 96.77              | 96.23                | n.a.           |
| <b>Total:</b> |           |                       | <b>427.140</b>  | <b>823.379</b> | <b>100.00</b>      | <b>100.00</b>        |                |

## Compound 3ja'

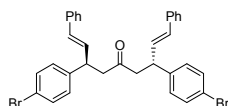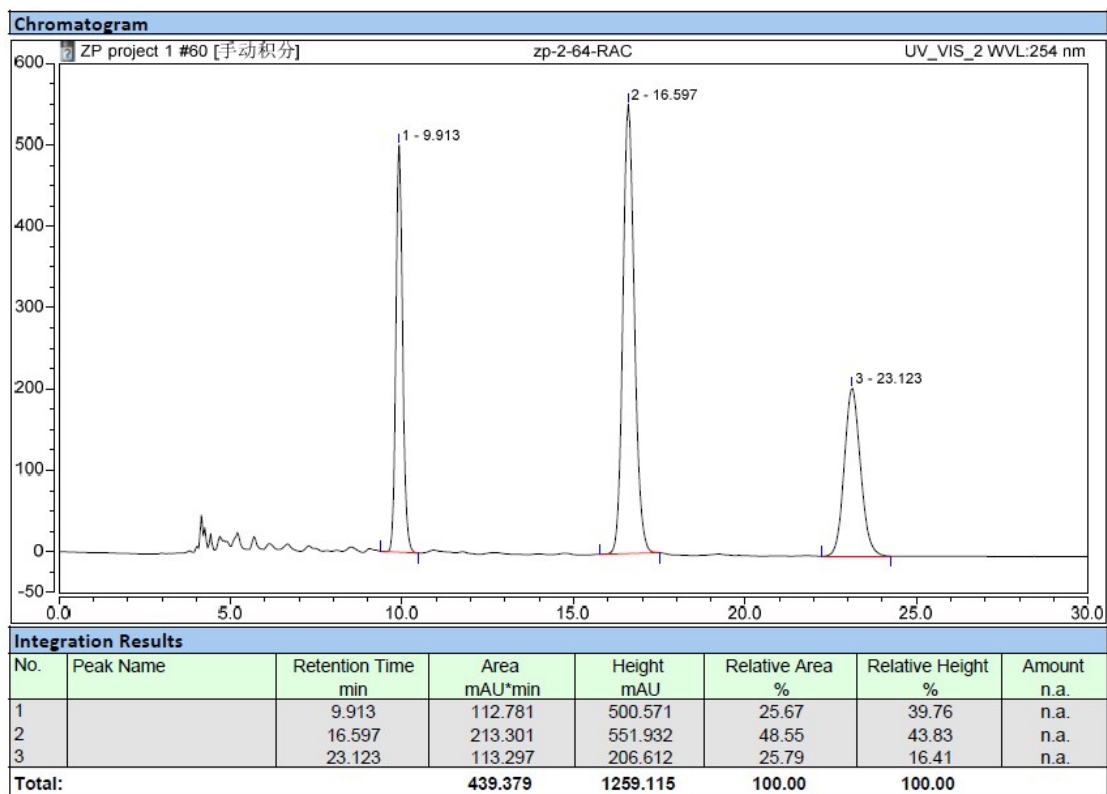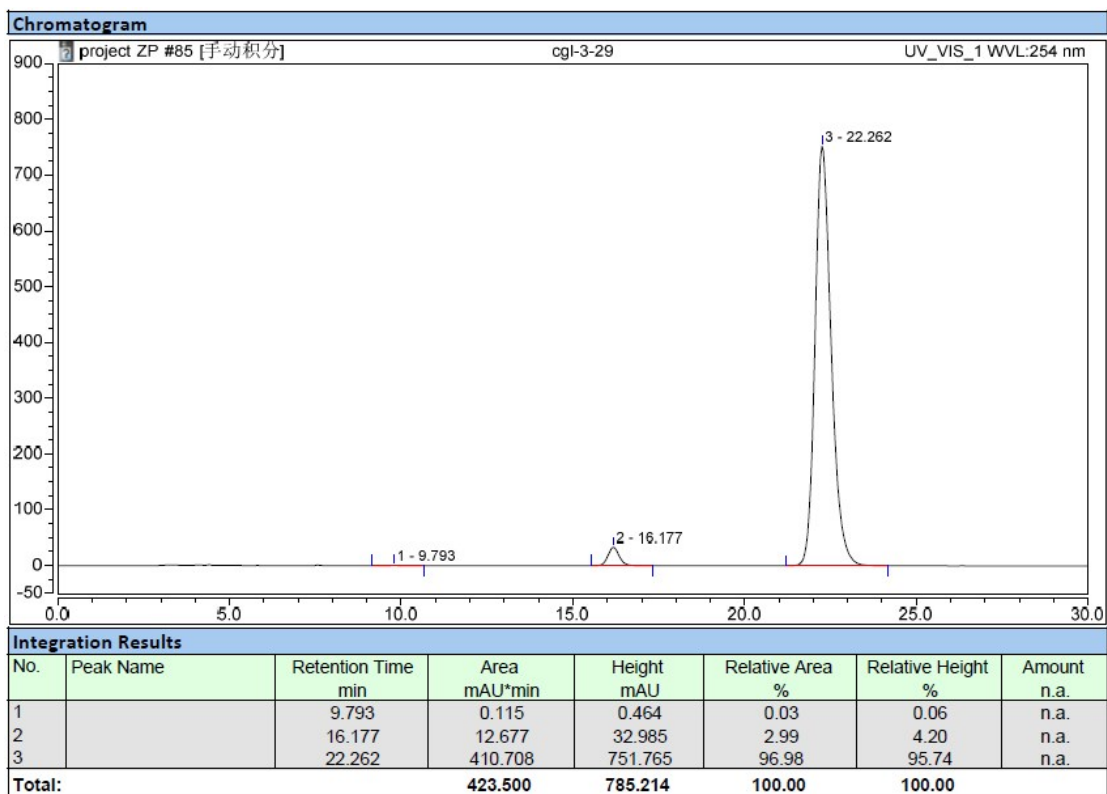

# Compound 3ka'

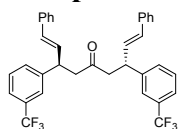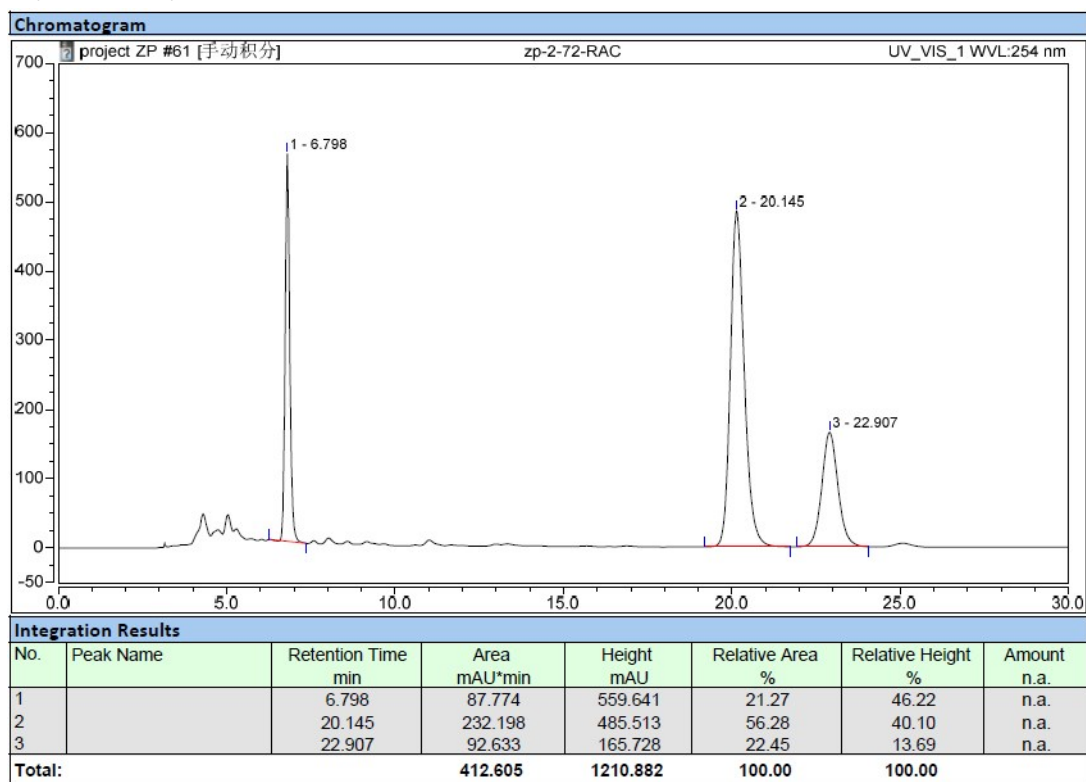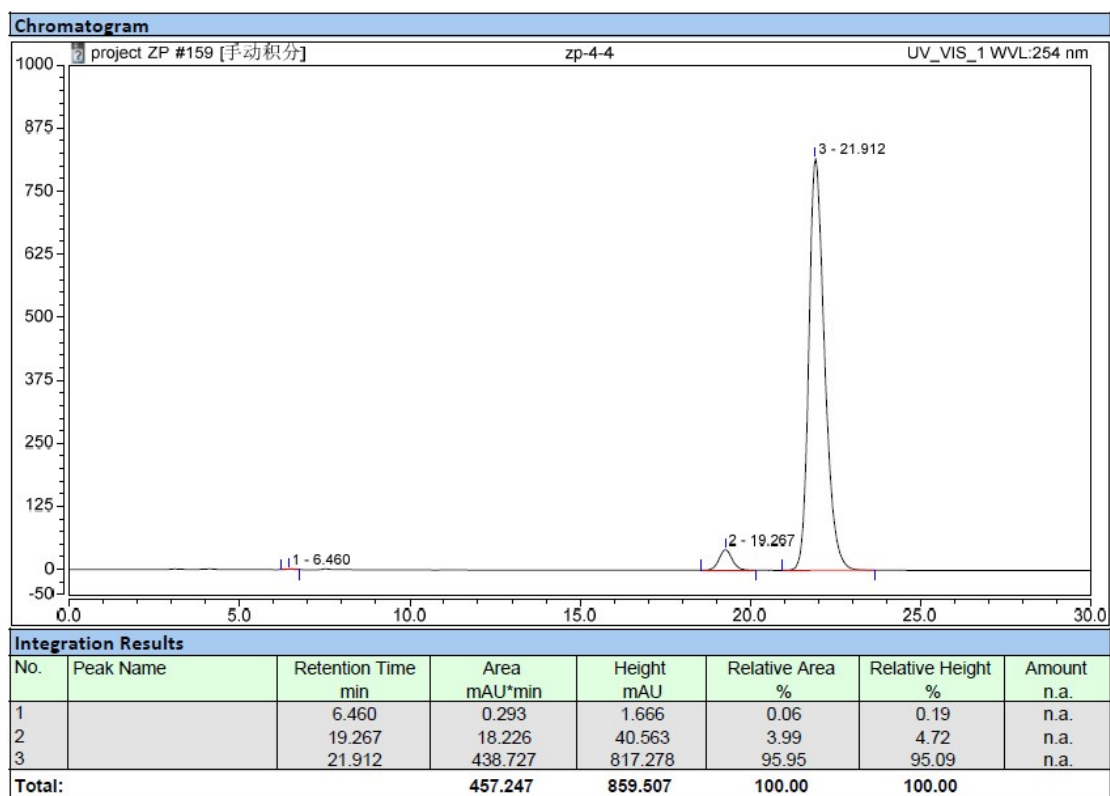



## Compound 3la'

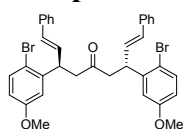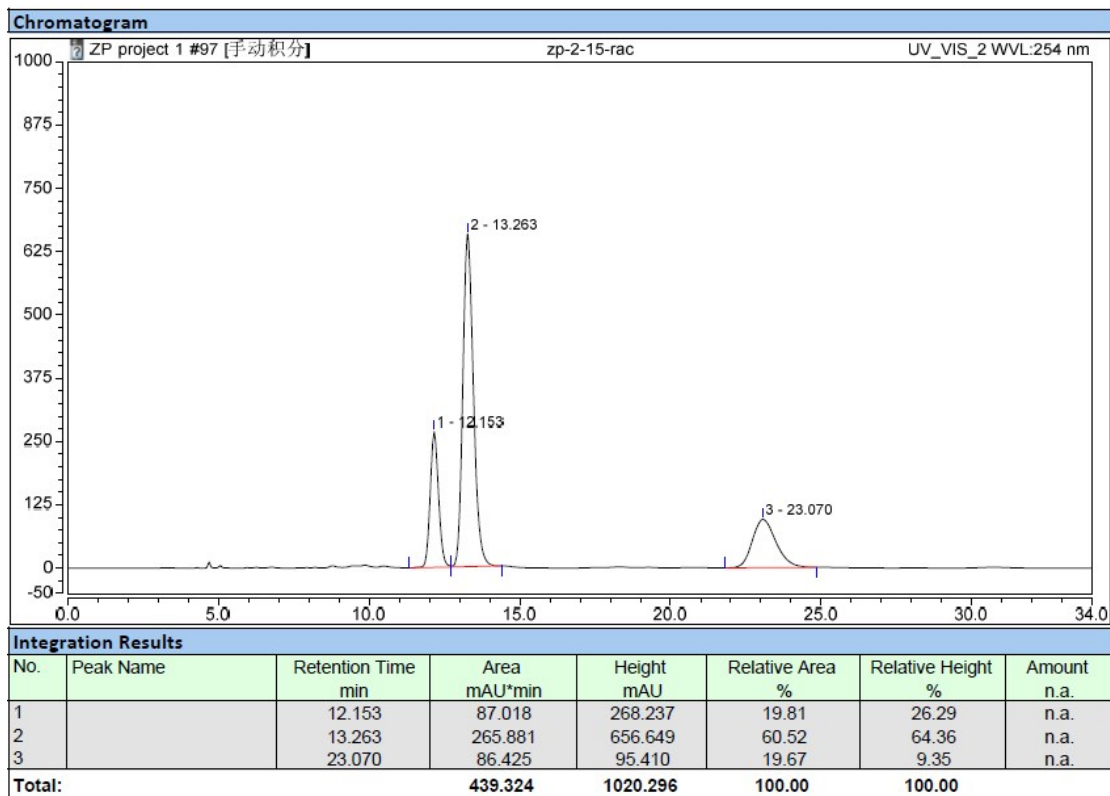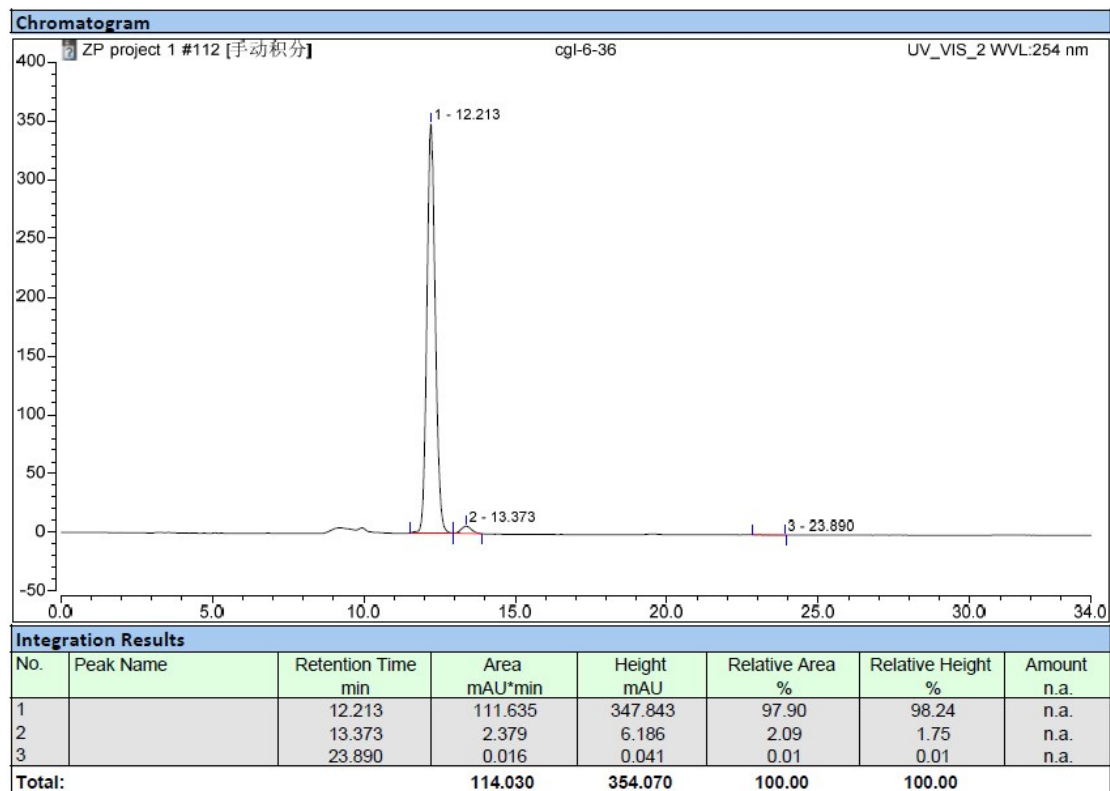

## Compound 3ma'

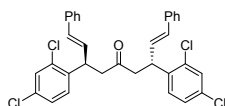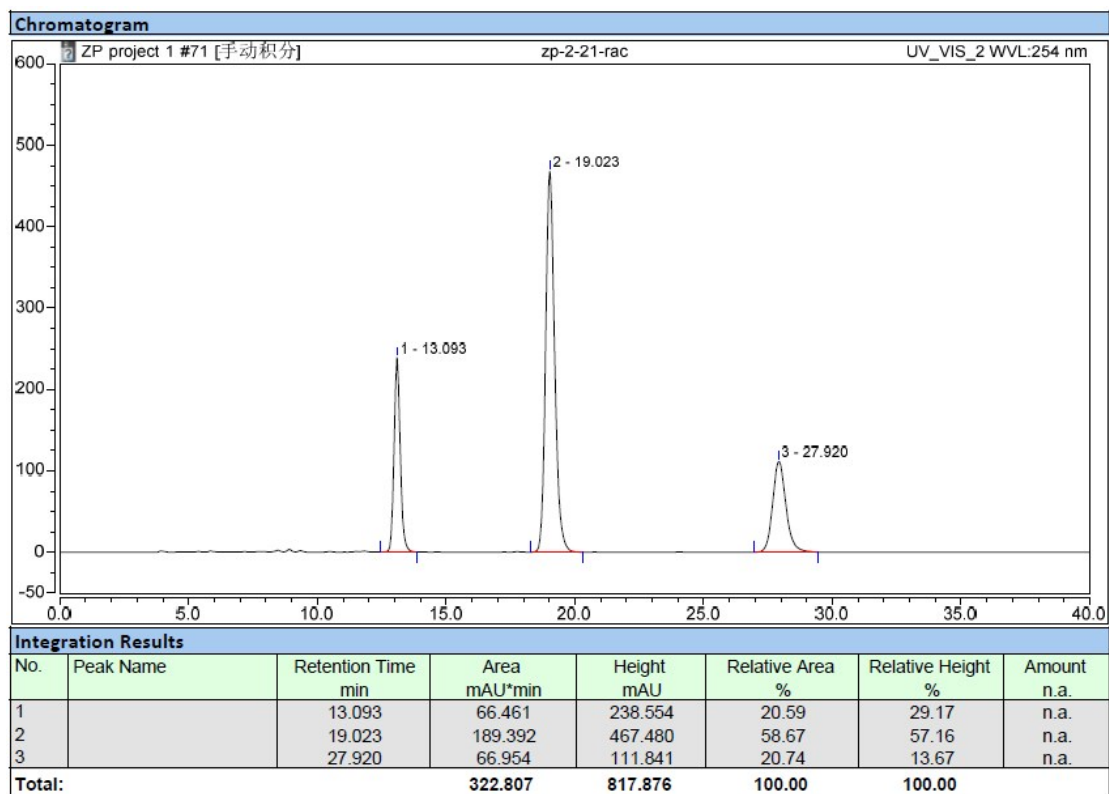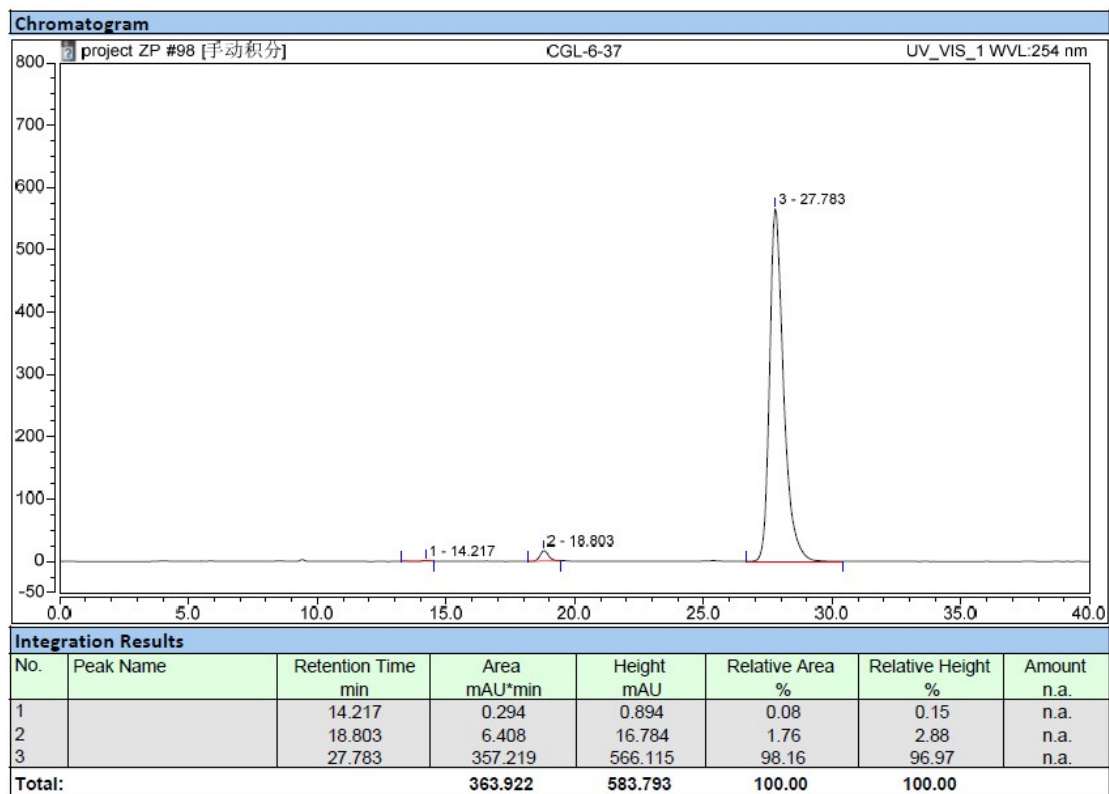

# Compound 3ra'

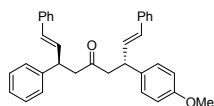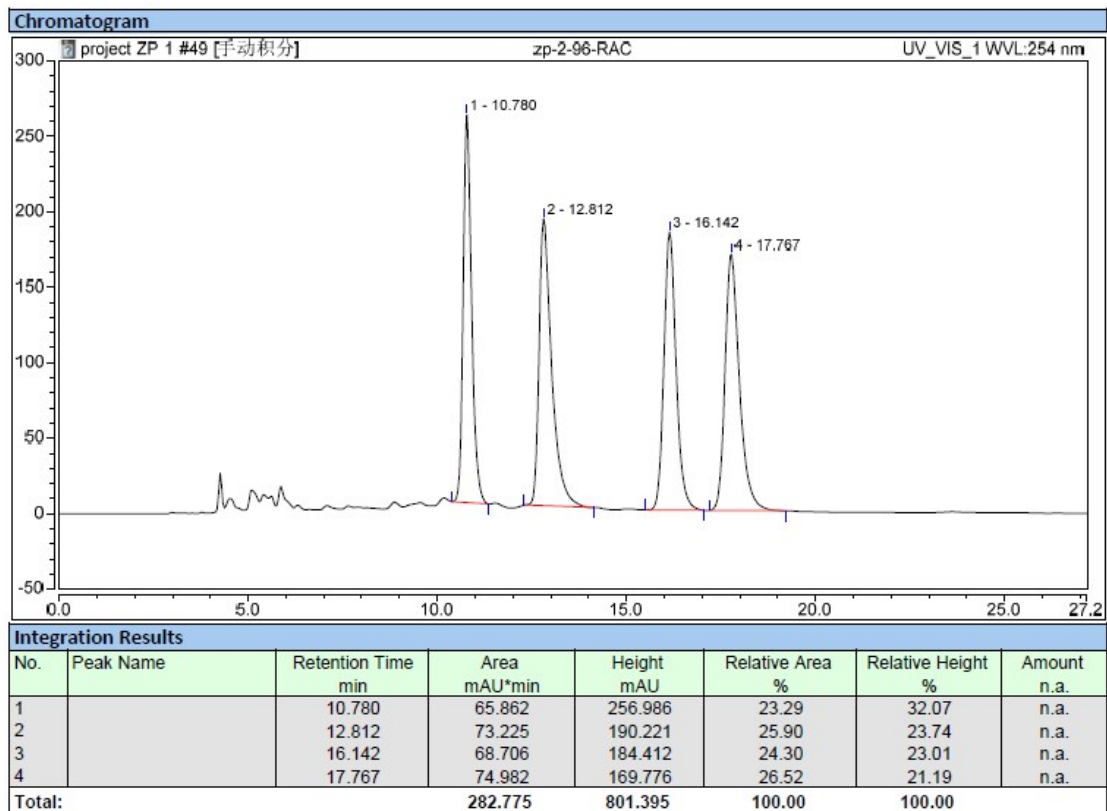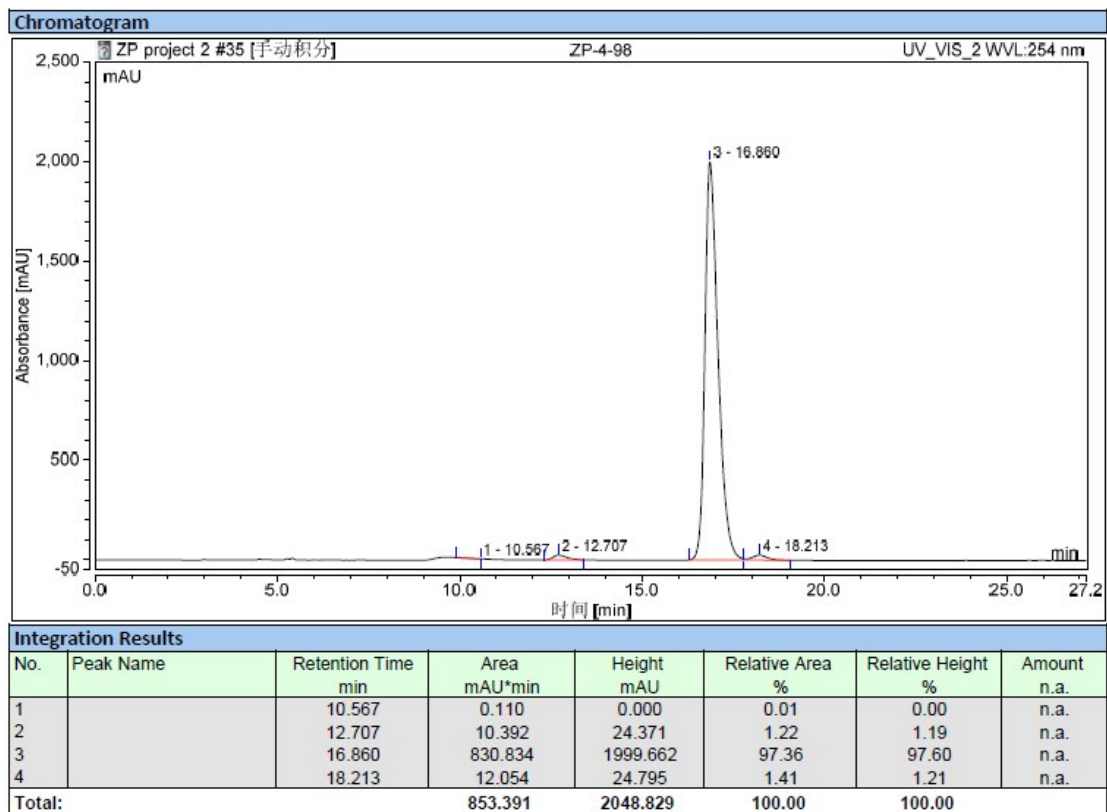

# Compound 3ta'

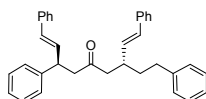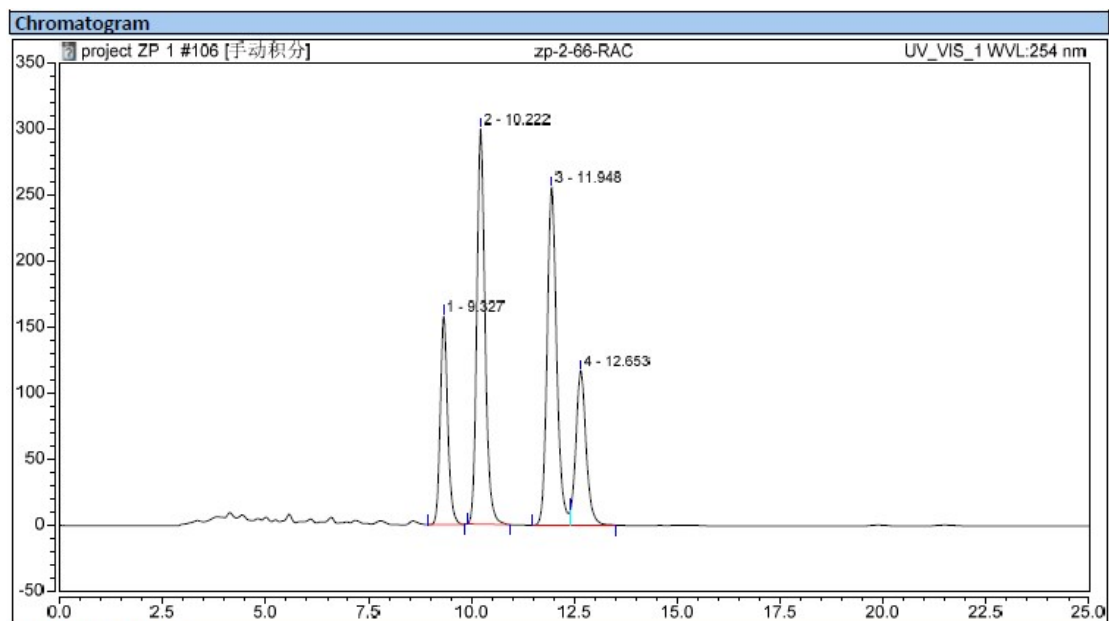

**Integration Results**

| No.    | Peak Name | Retention Time<br>min | Area<br>mAU*min | Height<br>mAU | Relative Area<br>% | Relative Height<br>% | Amount<br>n.a. |
|--------|-----------|-----------------------|-----------------|---------------|--------------------|----------------------|----------------|
| 1      |           | 9.327                 | 33.001          | 157.825       | 16.04              | 19.01                | n.a.           |
| 2      |           | 10.222                | 69.225          | 299.042       | 33.65              | 36.02                | n.a.           |
| 3      |           | 11.948                | 69.727          | 256.090       | 33.89              | 30.85                | n.a.           |
| 4      |           | 12.653                | 33.763          | 117.153       | 16.41              | 14.11                | n.a.           |
| Total: |           |                       | 205.716         | 830.110       | 100.00             | 100.00               |                |

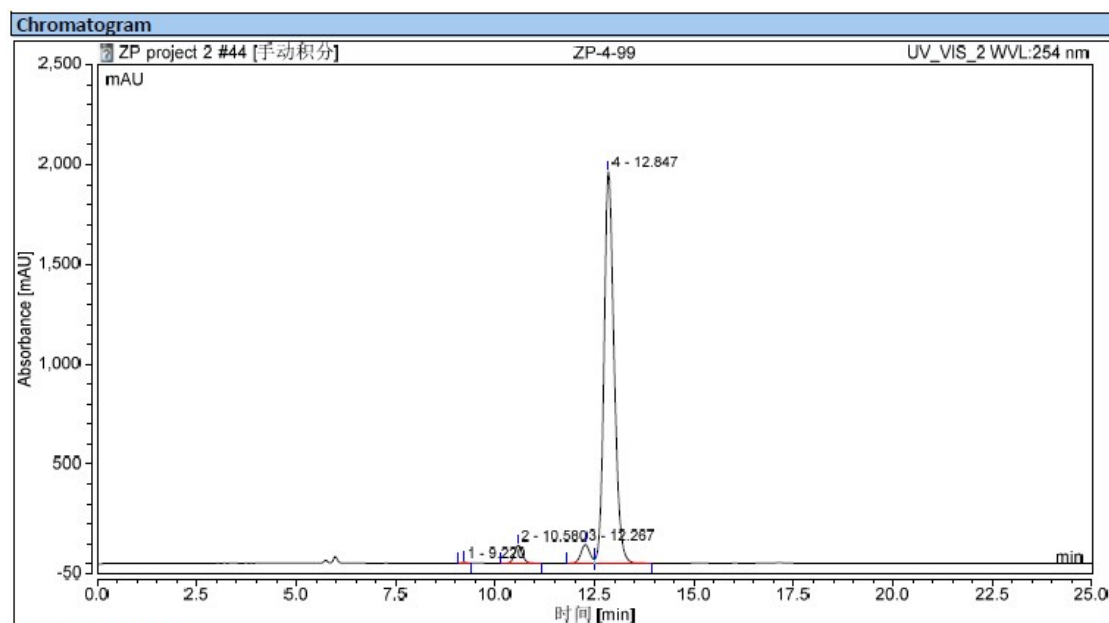

**Integration Results**

| No.    | Peak Name | Retention Time<br>min | Area<br>mAU*min | Height<br>mAU | Relative Area<br>% | Relative Height<br>% | Amount<br>n.a. |
|--------|-----------|-----------------------|-----------------|---------------|--------------------|----------------------|----------------|
| 1      |           | 9.220                 | 0.674           | 4.199         | 0.11               | 0.20                 | n.a.           |
| 2      |           | 10.580                | 20.602          | 90.588        | 3.32               | 4.21                 | n.a.           |
| 3      |           | 12.267                | 24.753          | 94.785        | 3.99               | 4.40                 | n.a.           |
| 4      |           | 12.847                | 574.501         | 1962.314      | 92.58              | 91.19                | n.a.           |
| Total: |           |                       | 620.529         | 2151.885      | 100.00             | 100.00               |                |

## Compound 3b'

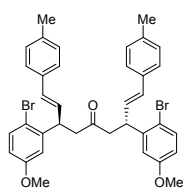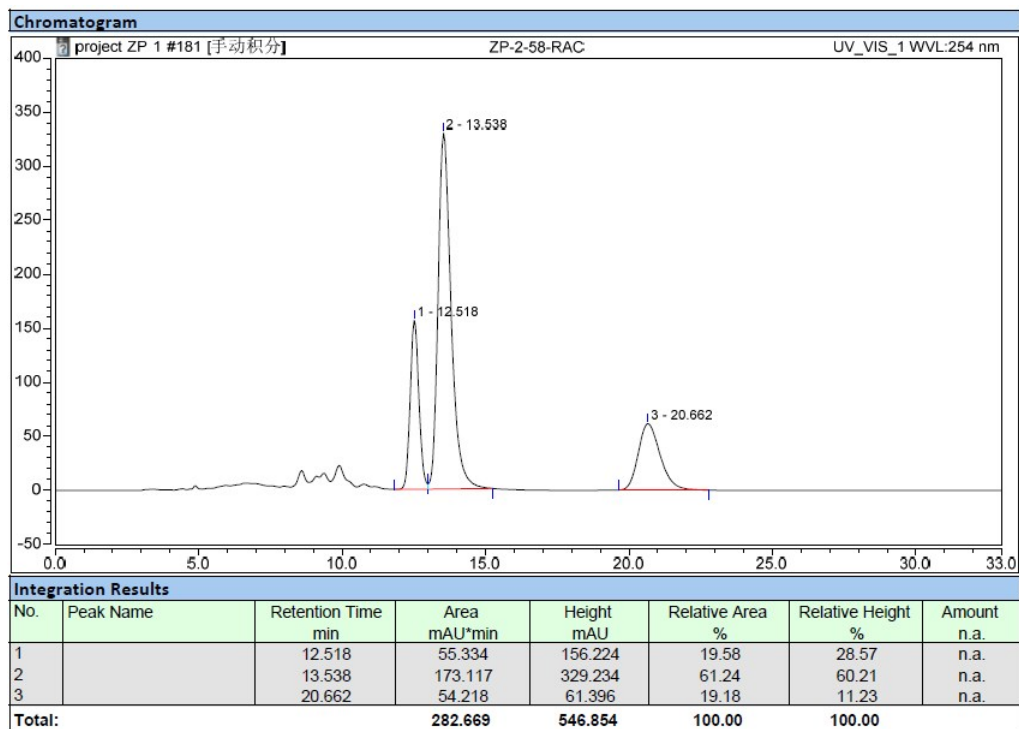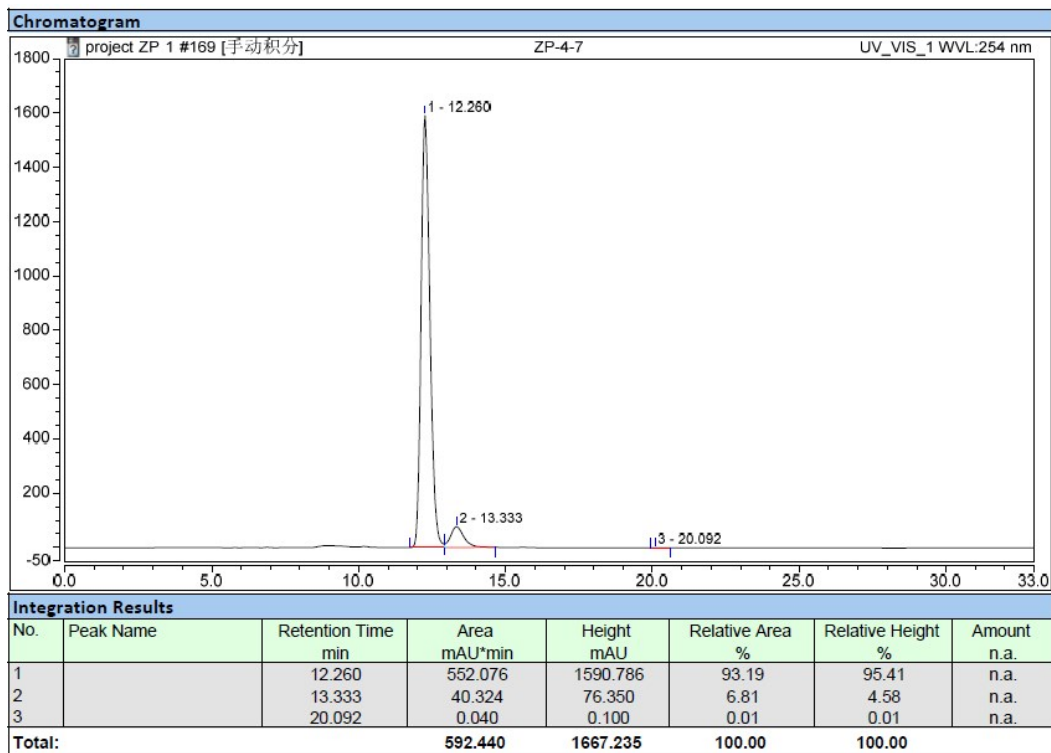

## Compound 3le'

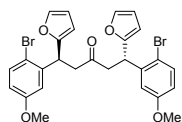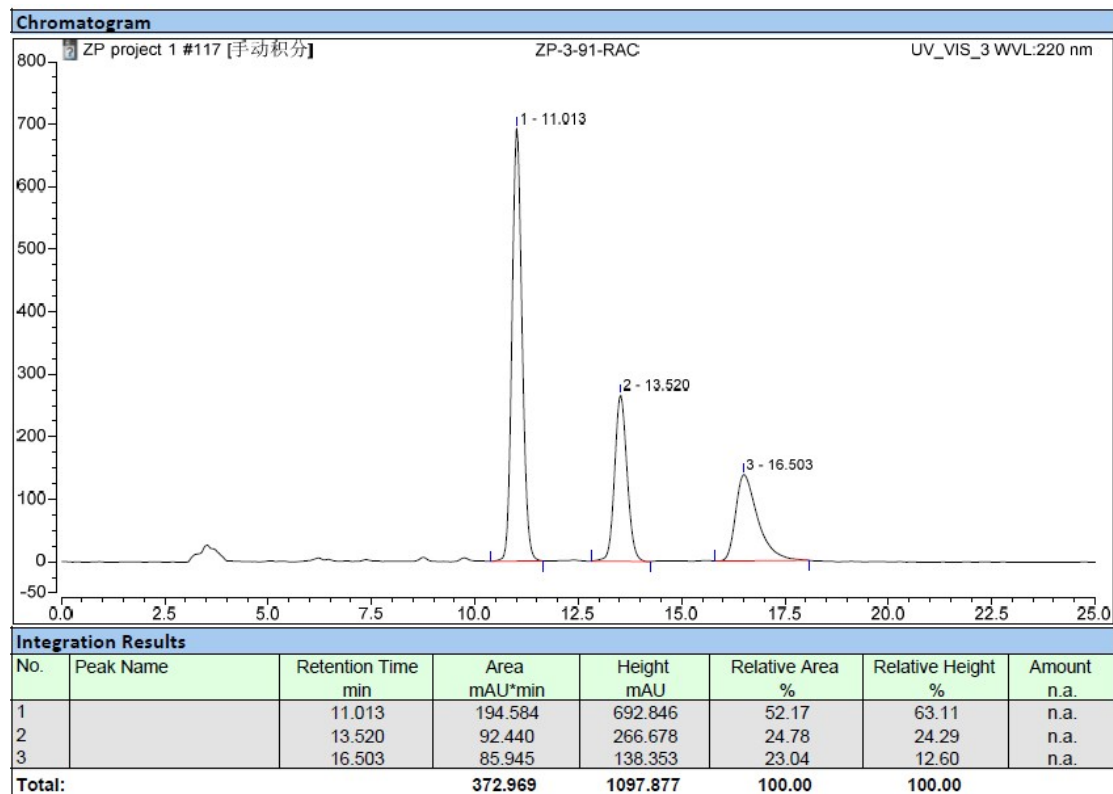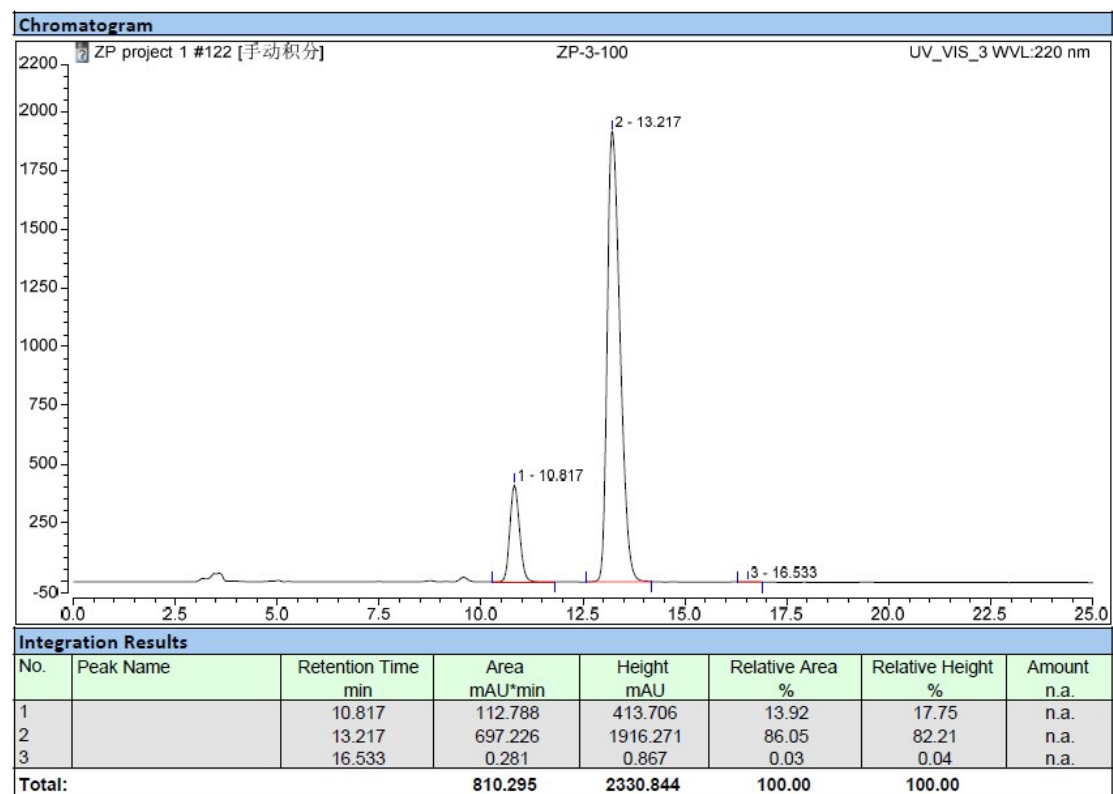

## Compound 3lf

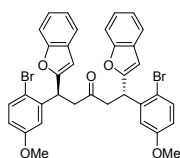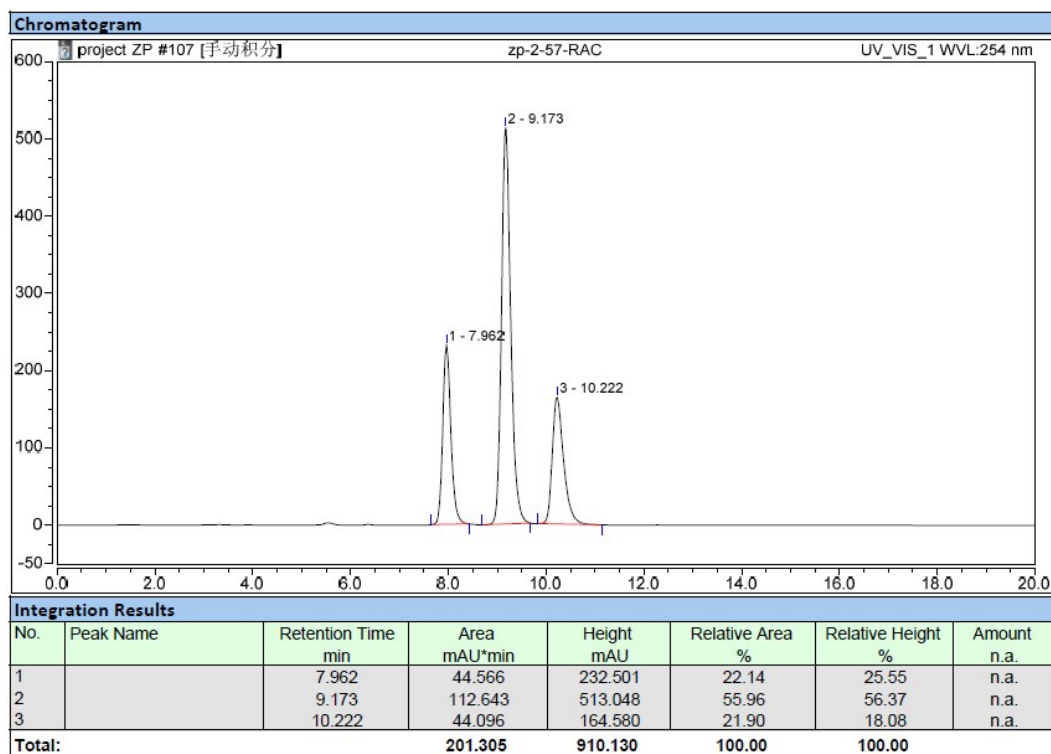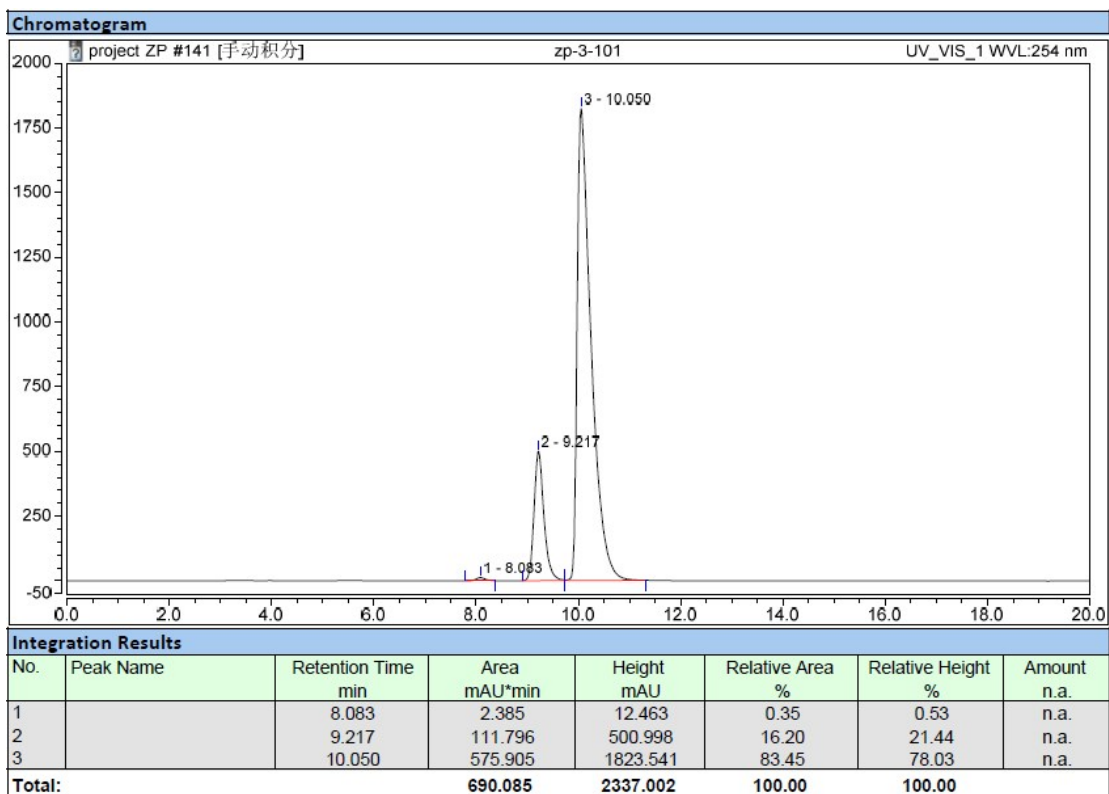

## Compound 3h'

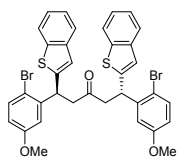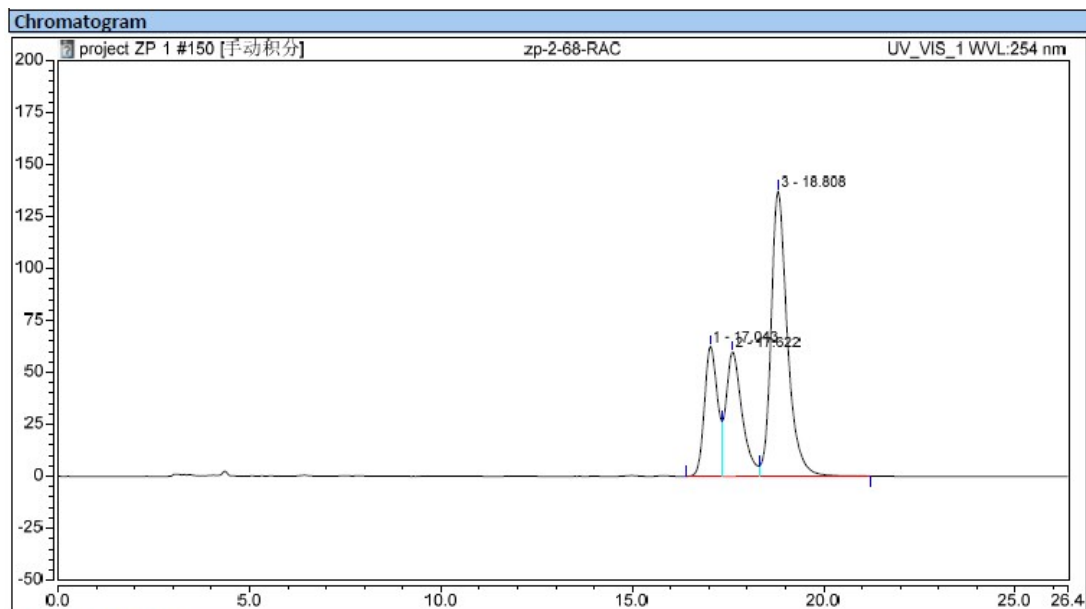

**Integration Results**

| No.           | Peak Name | Retention Time min | Area mAU*min   | Height mAU     | Relative Area % | Relative Height % | Amount |
|---------------|-----------|--------------------|----------------|----------------|-----------------|-------------------|--------|
| 1             |           | 17.043             | 24.923         | 62.553         | 20.46           | 24.07             | n.a.   |
| 2             |           | 17.622             | 29.211         | 60.004         | 23.98           | 23.09             | n.a.   |
| 3             |           | 18.808             | 67.666         | 137.287        | 55.55           | 52.83             | n.a.   |
| <b>Total:</b> |           |                    | <b>121.800</b> | <b>259.844</b> | <b>100.00</b>   | <b>100.00</b>     |        |

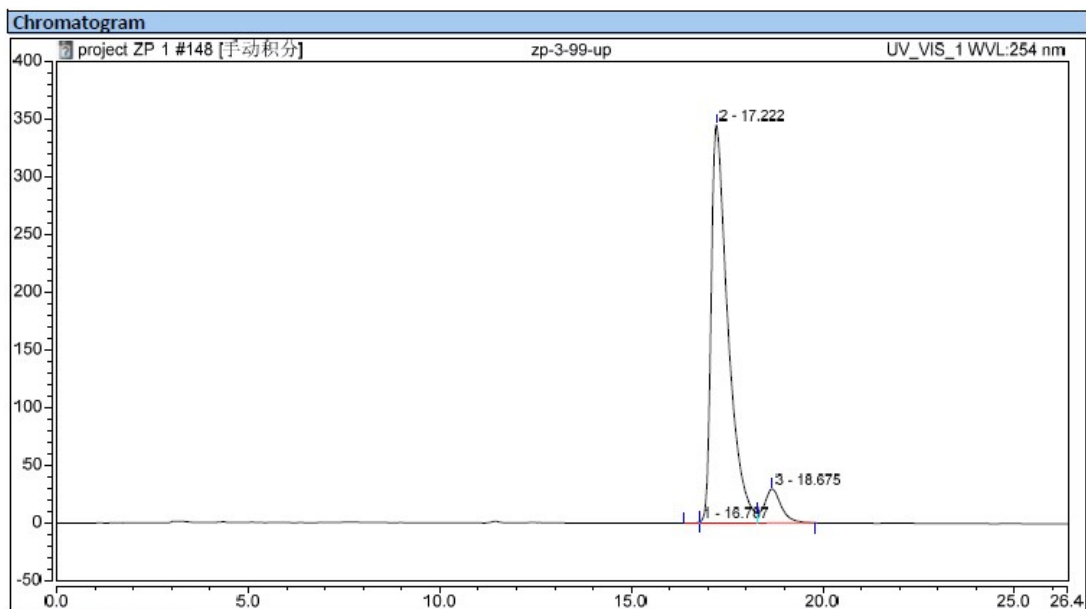

**Integration Results**

| No.           | Peak Name | Retention Time min | Area mAU*min   | Height mAU     | Relative Area % | Relative Height % | Amount |
|---------------|-----------|--------------------|----------------|----------------|-----------------|-------------------|--------|
| 1             |           | 16.787             | 0.060          | 1.006          | 0.03            | 0.27              | n.a.   |
| 2             |           | 17.222             | 175.453        | 344.923        | 91.97           | 91.86             | n.a.   |
| 3             |           | 18.675             | 15.259         | 29.561         | 8.00            | 7.87              | n.a.   |
| <b>Total:</b> |           |                    | <b>190.772</b> | <b>375.489</b> | <b>100.00</b>   | <b>100.00</b>     |        |



## Compound 3ea (scale-up version)

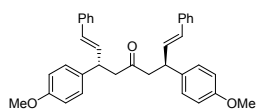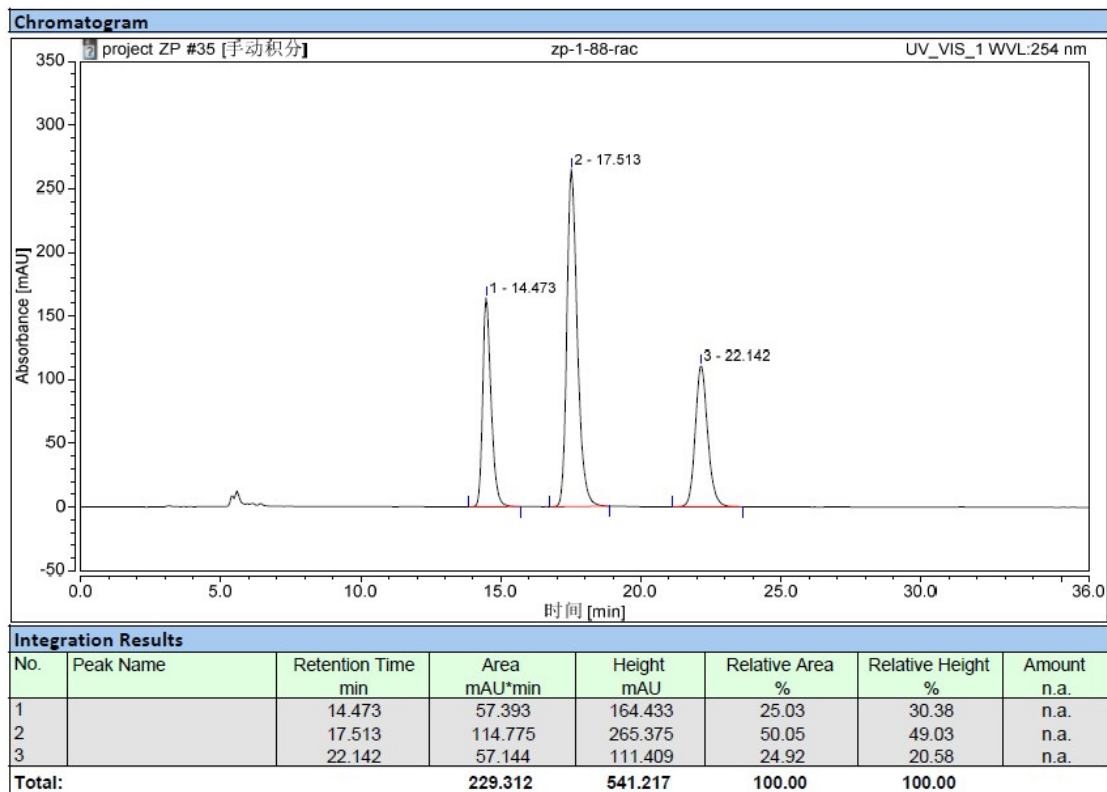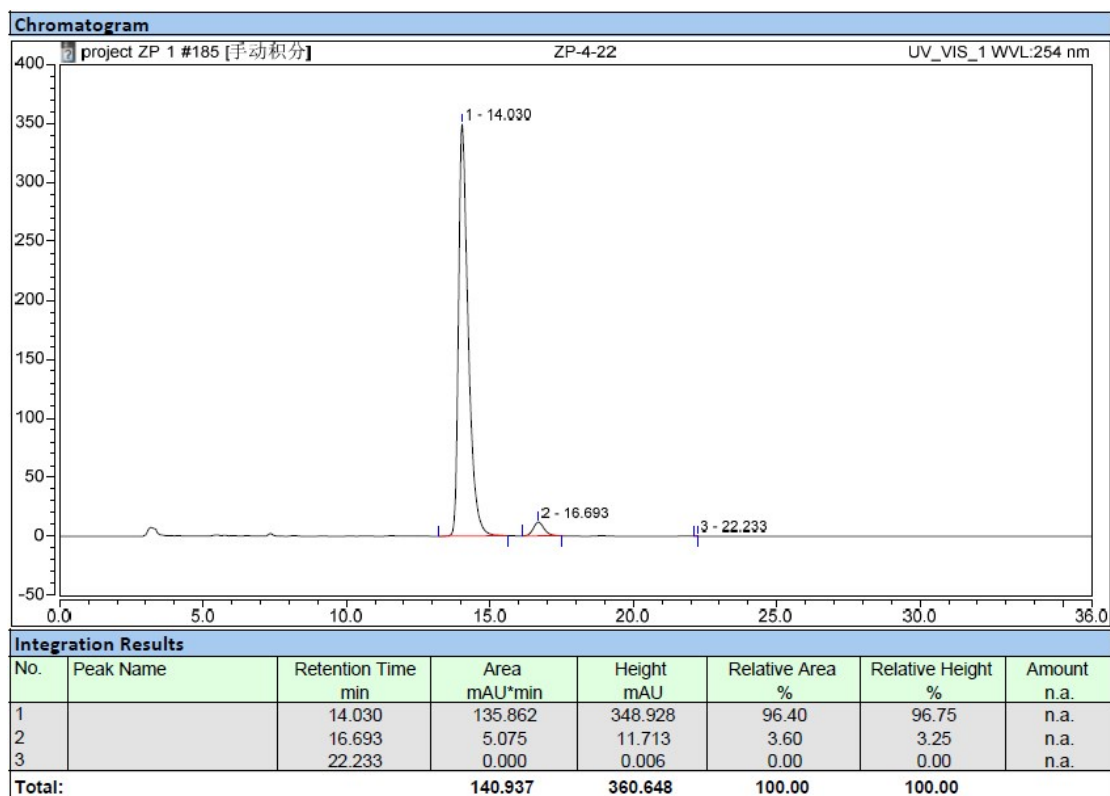

## Compound 5

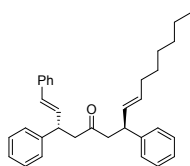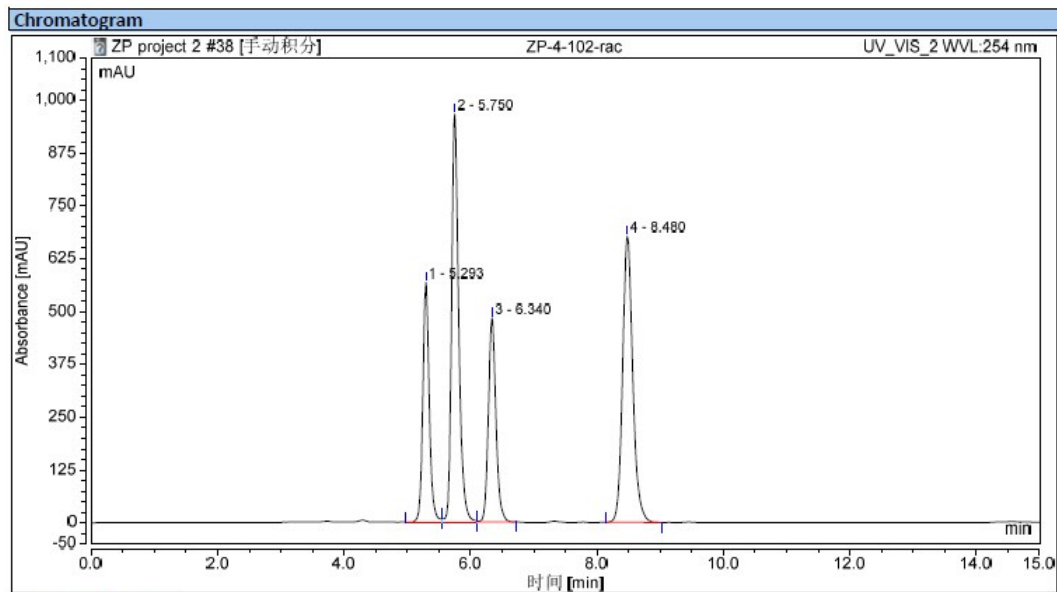

**Integration Results**

| No.           | Peak Name | Retention Time [min] | Area [mAU*min] | Height [mAU]    | Relative Area [%] | Relative Height [%] | Amount [n.a.] |
|---------------|-----------|----------------------|----------------|-----------------|-------------------|---------------------|---------------|
| 1             |           | 5.293                | 66.985         | 566.590         | 17.41             | 21.05               | n.a.          |
| 2             |           | 5.750                | 125.988        | 965.472         | 32.75             | 35.87               | n.a.          |
| 3             |           | 6.340                | 66.137         | 482.209         | 17.19             | 17.92               | n.a.          |
| 4             |           | 8.480                | 125.612        | 677.166         | 32.65             | 25.16               | n.a.          |
| <b>Total:</b> |           |                      | <b>384.721</b> | <b>2691.437</b> | <b>100.00</b>     | <b>100.00</b>       |               |

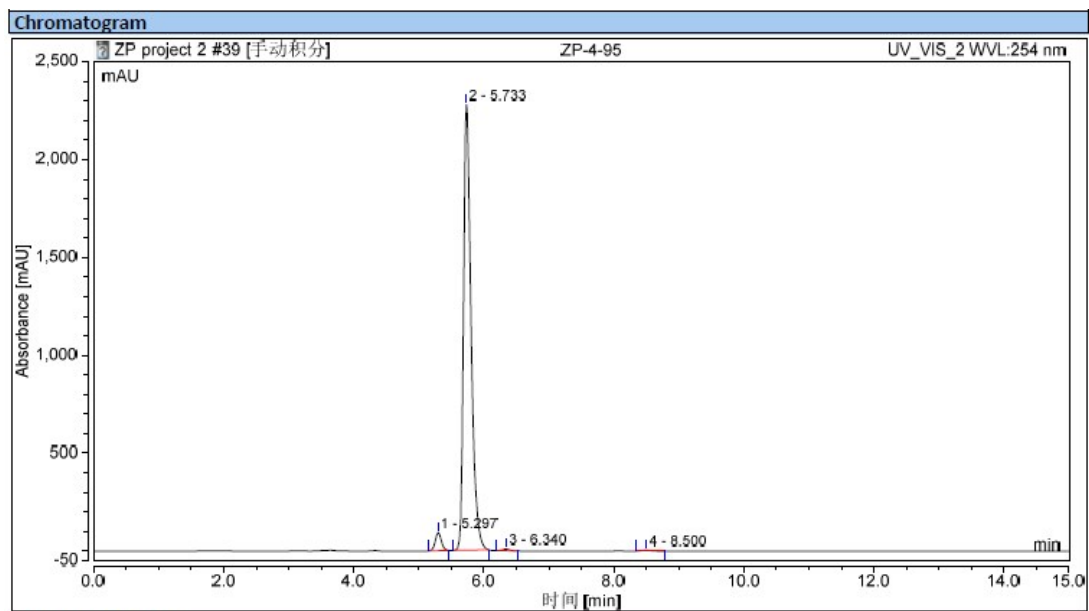

**Integration Results**

| No.           | Peak Name | Retention Time [min] | Area [mAU*min] | Height [mAU]    | Relative Area [%] | Relative Height [%] | Amount [n.a.] |
|---------------|-----------|----------------------|----------------|-----------------|-------------------|---------------------|---------------|
| 1             |           | 5.297                | 10.185         | 93.102          | 3.20              | 3.91                | n.a.          |
| 2             |           | 5.733                | 306.013        | 2276.318        | 96.27             | 95.57               | n.a.          |
| 3             |           | 6.340                | 1.132          | 9.147           | 0.36              | 0.38                | n.a.          |
| 4             |           | 8.500                | 0.524          | 3.226           | 0.16              | 0.14                | n.a.          |
| <b>Total:</b> |           |                      | <b>317.854</b> | <b>2381.793</b> | <b>100.00</b>     | <b>100.00</b>       |               |

## Compound 6

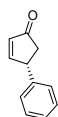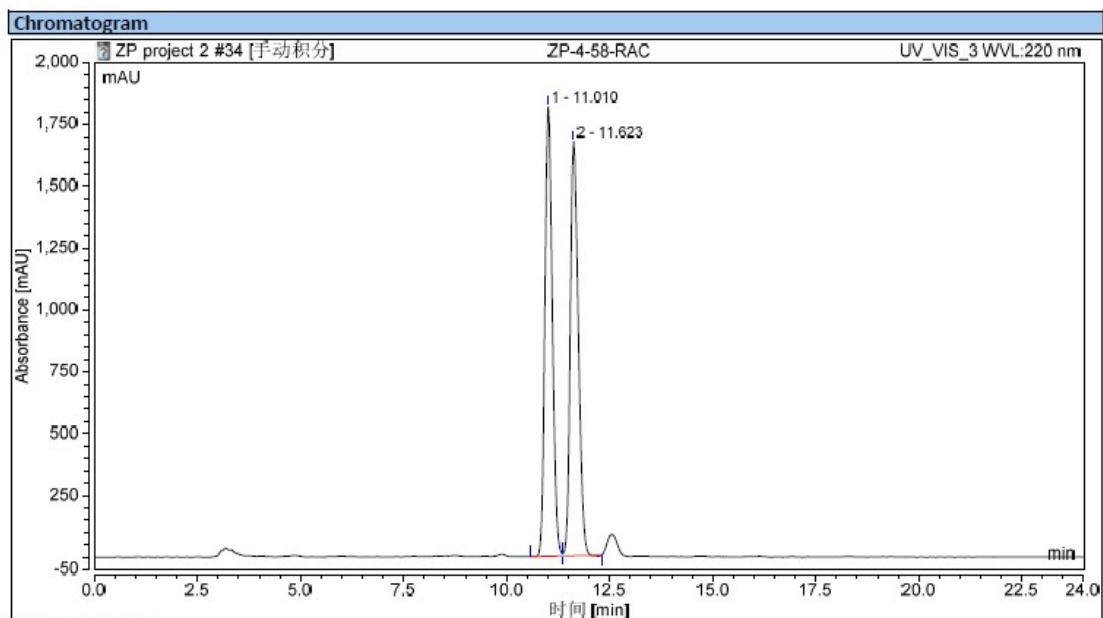

**Integration Results**

| No.    | Peak Name | Retention Time<br>min | Area<br>mAU*min | Height<br>mAU | Relative Area<br>% | Relative Height<br>% | Amount<br>n.a. |
|--------|-----------|-----------------------|-----------------|---------------|--------------------|----------------------|----------------|
| 1      |           | 11.010                | 380.334         | 1818.009      | 49.88              | 52.05                | n.a.           |
| 2      |           | 11.623                | 382.219         | 1675.121      | 50.12              | 47.95                | n.a.           |
| Total: |           |                       | 762.554         | 3493.130      | 100.00             | 100.00               |                |

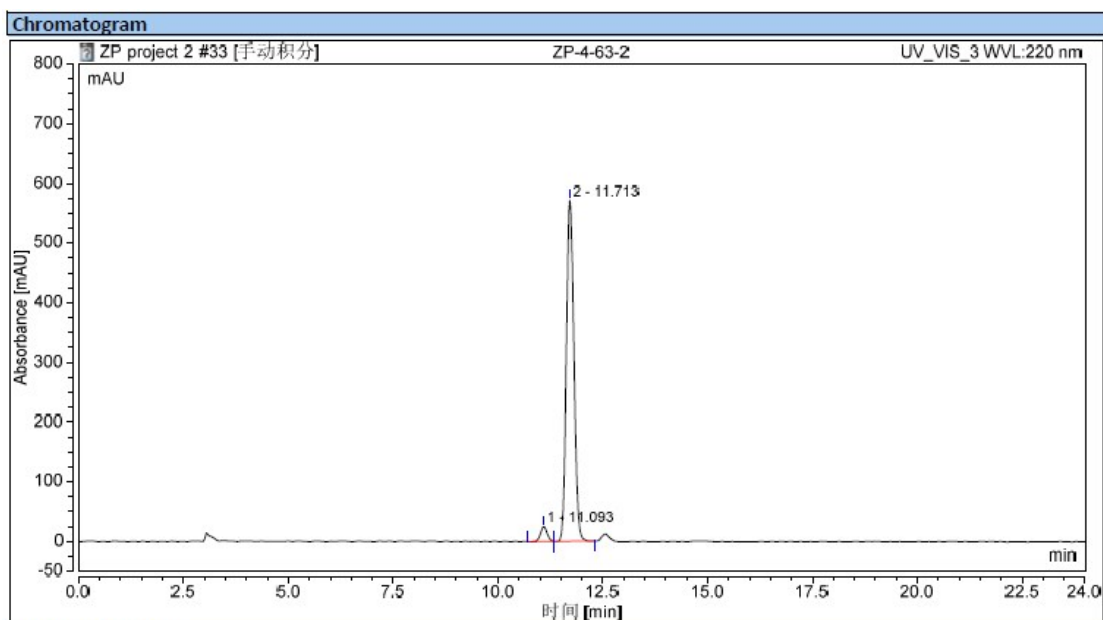

**Integration Results**

| No.    | Peak Name | Retention Time<br>min | Area<br>mAU*min | Height<br>mAU | Relative Area<br>% | Relative Height<br>% | Amount<br>n.a. |
|--------|-----------|-----------------------|-----------------|---------------|--------------------|----------------------|----------------|
| 1      |           | 11.093                | 4.527           | 25.236        | 3.68               | 4.23                 | n.a.           |
| 2      |           | 11.713                | 118.554         | 570.880       | 96.32              | 95.77                | n.a.           |
| Total: |           |                       | 123.081         | 596.117       | 100.00             | 100.00               |                |
